# Supplementary material for: Alterations in SARS-CoV-2 Omicron and Delta peptides presentation by HLA molecules
Source: PeerJ. 2022 Apr 27;10:e13354. doi: 10.7717/peerj.13354 (PMC9055995; doi:10.7717/peerj.13354)
Supplement: Supplemental Information 2 — ELISA absorbance values are presented for reference Wuhan/Delta peptide, four Omicron BA.1 peptides, two Omicron BA.2 peptides and the negative control (two biological replicates each). [file peerj-10-13354-s002.xlsx]

## Sheet: Table S2
Peptide	HLA-DRB1*03:01+, 1	HLA-DRB1*03:01+, 2	HLA-DRB1*03:01-, 1	HLA-DRB1*03:01-, 2
Wuhan/Delta	1.27098	1.08476	0.08647	0.137082
Omicron1	0.0838398	0.094413	0.0593507	0.072272
Omicron2	0.112247	0.141678	0.0653826	0.0614944
Omicron3	0.123791	0.137584	0.0975936	0.0749674
Omicron4	0.158412	0.124988	0.097937	0.093524
Omicron5	0.0839165	0.0750246	0.0584684	0.0621184
Omicron6	0.302126	0.406842	0.061164	0.0642432
Negative control	0.102252	0.0947252	0.0656919	0.0767483
