# Supplementary material for: Alterations in SARS-CoV-2 Omicron and Delta peptides presentation by HLA molecules
Source: PeerJ. 2022 Apr 27;10:e13354. doi: 10.7717/peerj.13354 (PMC9055995; doi:10.7717/peerj.13354)
Supplement: Supplemental Information 3 — The number of tightly binding peptides (affinity less or equal to 50 nM) was calculated for each out of 9576 HLA class I haplotypes from the theoretical library. [file peerj-10-13354-s003.xlsx]

## Sheet: Table S3
HLA-A	HLA-B	HLA-C	Wuhan, whole virus	Delta, whole virus	Omicron, whole virus	Wuhan, spike	Delta, spike	Omicron, spike
HLA-A*01:01	HLA-B*07:02	HLA-C*01:02	125	123	121	14	10	9
HLA-A*01:01	HLA-B*07:02	HLA-C*02:02	129	127	126	13	9	9
HLA-A*01:01	HLA-B*07:02	HLA-C*02:10	129	127	126	13	9	9
HLA-A*01:01	HLA-B*07:02	HLA-C*03:02	310	308	307	38	34	34
HLA-A*01:01	HLA-B*07:02	HLA-C*03:03	225	223	222	26	22	22
HLA-A*01:01	HLA-B*07:02	HLA-C*03:04	225	223	222	26	22	22
HLA-A*01:01	HLA-B*07:02	HLA-C*04:01	119	117	116	12	8	8
HLA-A*01:01	HLA-B*07:02	HLA-C*05:01	146	144	142	13	9	9
HLA-A*01:01	HLA-B*07:02	HLA-C*06:02	125	123	122	13	9	9
HLA-A*01:01	HLA-B*07:02	HLA-C*07:01	121	119	118	12	8	8
HLA-A*01:01	HLA-B*07:02	HLA-C*07:02	130	128	127	12	8	8
HLA-A*01:01	HLA-B*07:02	HLA-C*08:01	121	119	118	12	8	8
HLA-A*01:01	HLA-B*07:02	HLA-C*08:02	137	135	133	13	9	9
HLA-A*01:01	HLA-B*07:02	HLA-C*12:02	149	147	146	15	11	11
HLA-A*01:01	HLA-B*07:02	HLA-C*12:03	221	218	220	27	23	25
HLA-A*01:01	HLA-B*07:02	HLA-C*14:02	315	311	315	28	24	26
HLA-A*01:01	HLA-B*07:02	HLA-C*15:02	145	143	143	15	11	12
HLA-A*01:01	HLA-B*07:02	HLA-C*16:01	264	262	262	32	28	29
HLA-A*01:01	HLA-B*07:02	HLA-C*17:01	137	135	134	14	10	10
HLA-A*01:01	HLA-B*08:01	HLA-C*01:02	111	113	110	11	12	10
HLA-A*01:01	HLA-B*08:01	HLA-C*02:02	115	117	115	10	11	10
HLA-A*01:01	HLA-B*08:01	HLA-C*02:10	115	117	115	10	11	10
HLA-A*01:01	HLA-B*08:01	HLA-C*03:02	290	292	290	35	36	35
HLA-A*01:01	HLA-B*08:01	HLA-C*03:03	206	208	206	23	24	23
HLA-A*01:01	HLA-B*08:01	HLA-C*03:04	206	208	206	23	24	23
HLA-A*01:01	HLA-B*08:01	HLA-C*04:01	105	107	105	9	10	9
HLA-A*01:01	HLA-B*08:01	HLA-C*05:01	132	134	131	10	11	10
HLA-A*01:01	HLA-B*08:01	HLA-C*06:02	111	113	111	10	11	10
HLA-A*01:01	HLA-B*08:01	HLA-C*07:01	107	109	107	9	10	9
HLA-A*01:01	HLA-B*08:01	HLA-C*07:02	116	118	116	9	10	9
HLA-A*01:01	HLA-B*08:01	HLA-C*08:01	107	109	107	9	10	9
HLA-A*01:01	HLA-B*08:01	HLA-C*08:02	123	125	122	10	11	10
HLA-A*01:01	HLA-B*08:01	HLA-C*12:02	133	135	133	12	13	12
HLA-A*01:01	HLA-B*08:01	HLA-C*12:03	202	203	204	24	25	26
HLA-A*01:01	HLA-B*08:01	HLA-C*14:02	299	299	302	25	26	27
HLA-A*01:01	HLA-B*08:01	HLA-C*15:02	130	132	131	12	13	13
HLA-A*01:01	HLA-B*08:01	HLA-C*16:01	245	247	246	29	30	30
HLA-A*01:01	HLA-B*08:01	HLA-C*17:01	122	124	122	10	11	10
HLA-A*01:01	HLA-B*14:02	HLA-C*01:02	71	71	70	8	8	7
HLA-A*01:01	HLA-B*14:02	HLA-C*02:02	75	75	75	7	7	7
HLA-A*01:01	HLA-B*14:02	HLA-C*02:10	75	75	75	7	7	7
HLA-A*01:01	HLA-B*14:02	HLA-C*03:02	257	257	257	32	32	32
HLA-A*01:01	HLA-B*14:02	HLA-C*03:03	172	172	172	20	20	20
HLA-A*01:01	HLA-B*14:02	HLA-C*03:04	172	172	172	20	20	20
HLA-A*01:01	HLA-B*14:02	HLA-C*04:01	65	65	65	6	6	6
HLA-A*01:01	HLA-B*14:02	HLA-C*05:01	92	92	91	7	7	7
HLA-A*01:01	HLA-B*14:02	HLA-C*06:02	71	71	71	7	7	7
HLA-A*01:01	HLA-B*14:02	HLA-C*07:01	67	67	67	6	6	6
HLA-A*01:01	HLA-B*14:02	HLA-C*07:02	76	76	76	6	6	6
HLA-A*01:01	HLA-B*14:02	HLA-C*08:01	67	67	67	6	6	6
HLA-A*01:01	HLA-B*14:02	HLA-C*08:02	83	83	82	7	7	7
HLA-A*01:01	HLA-B*14:02	HLA-C*12:02	95	95	95	9	9	9
HLA-A*01:01	HLA-B*14:02	HLA-C*12:03	168	167	170	21	21	23
HLA-A*01:01	HLA-B*14:02	HLA-C*14:02	261	259	264	22	22	24
HLA-A*01:01	HLA-B*14:02	HLA-C*15:02	91	91	92	9	9	10
HLA-A*01:01	HLA-B*14:02	HLA-C*16:01	211	211	212	26	26	27
HLA-A*01:01	HLA-B*14:02	HLA-C*17:01	83	83	83	8	8	8
HLA-A*01:01	HLA-B*15:01	HLA-C*01:02	242	243	241	21	21	18
HLA-A*01:01	HLA-B*15:01	HLA-C*02:02	244	245	244	20	20	18
HLA-A*01:01	HLA-B*15:01	HLA-C*02:10	244	245	244	20	20	18
HLA-A*01:01	HLA-B*15:01	HLA-C*03:02	387	388	387	43	43	41
HLA-A*01:01	HLA-B*15:01	HLA-C*03:03	335	336	335	33	33	31
HLA-A*01:01	HLA-B*15:01	HLA-C*03:04	335	336	335	33	33	31
HLA-A*01:01	HLA-B*15:01	HLA-C*04:01	236	237	236	19	19	17
HLA-A*01:01	HLA-B*15:01	HLA-C*05:01	263	264	262	20	20	18
HLA-A*01:01	HLA-B*15:01	HLA-C*06:02	242	243	242	20	20	18
HLA-A*01:01	HLA-B*15:01	HLA-C*07:01	238	239	238	19	19	17
HLA-A*01:01	HLA-B*15:01	HLA-C*07:02	247	248	247	19	19	17
HLA-A*01:01	HLA-B*15:01	HLA-C*08:01	238	239	238	19	19	17
HLA-A*01:01	HLA-B*15:01	HLA-C*08:02	254	255	253	20	20	18
HLA-A*01:01	HLA-B*15:01	HLA-C*12:02	263	264	263	22	22	20
HLA-A*01:01	HLA-B*15:01	HLA-C*12:03	334	334	336	34	34	34
HLA-A*01:01	HLA-B*15:01	HLA-C*14:02	425	424	428	35	35	35
HLA-A*01:01	HLA-B*15:01	HLA-C*15:02	262	263	263	22	22	21
HLA-A*01:01	HLA-B*15:01	HLA-C*16:01	371	372	372	38	38	37
HLA-A*01:01	HLA-B*15:01	HLA-C*17:01	254	255	254	21	21	19
HLA-A*01:01	HLA-B*15:03	HLA-C*01:02	541	543	545	67	67	70
HLA-A*01:01	HLA-B*15:03	HLA-C*02:02	539	541	544	66	66	70
HLA-A*01:01	HLA-B*15:03	HLA-C*02:10	539	541	544	66	66	70
HLA-A*01:01	HLA-B*15:03	HLA-C*03:02	625	627	630	75	75	79
HLA-A*01:01	HLA-B*15:03	HLA-C*03:03	619	621	624	75	75	79
HLA-A*01:01	HLA-B*15:03	HLA-C*03:04	619	621	624	75	75	79
HLA-A*01:01	HLA-B*15:03	HLA-C*04:01	535	537	540	65	65	69
HLA-A*01:01	HLA-B*15:03	HLA-C*05:01	562	564	566	66	66	70
HLA-A*01:01	HLA-B*15:03	HLA-C*06:02	541	543	546	66	66	70
HLA-A*01:01	HLA-B*15:03	HLA-C*07:01	537	539	542	65	65	69
HLA-A*01:01	HLA-B*15:03	HLA-C*07:02	545	547	550	65	65	69
HLA-A*01:01	HLA-B*15:03	HLA-C*08:01	537	539	542	65	65	69
HLA-A*01:01	HLA-B*15:03	HLA-C*08:02	553	555	557	66	66	70
HLA-A*01:01	HLA-B*15:03	HLA-C*12:02	547	549	552	66	66	70
HLA-A*01:01	HLA-B*15:03	HLA-C*12:03	607	608	613	73	73	78
HLA-A*01:01	HLA-B*15:03	HLA-C*14:02	713	713	721	80	80	86
HLA-A*01:01	HLA-B*15:03	HLA-C*15:02	559	561	565	68	68	73
HLA-A*01:01	HLA-B*15:03	HLA-C*16:01	629	631	634	75	75	79
HLA-A*01:01	HLA-B*15:03	HLA-C*17:01	552	554	557	67	67	71
HLA-A*01:01	HLA-B*18:01	HLA-C*01:02	102	102	103	12	12	12
HLA-A*01:01	HLA-B*18:01	HLA-C*02:02	106	106	108	11	11	12
HLA-A*01:01	HLA-B*18:01	HLA-C*02:10	106	106	108	11	11	12
HLA-A*01:01	HLA-B*18:01	HLA-C*03:02	288	288	290	36	36	37
HLA-A*01:01	HLA-B*18:01	HLA-C*03:03	203	203	205	24	24	25
HLA-A*01:01	HLA-B*18:01	HLA-C*03:04	203	203	205	24	24	25
HLA-A*01:01	HLA-B*18:01	HLA-C*04:01	96	96	98	10	10	11
HLA-A*01:01	HLA-B*18:01	HLA-C*05:01	123	123	124	11	11	12
HLA-A*01:01	HLA-B*18:01	HLA-C*06:02	102	102	104	11	11	12
HLA-A*01:01	HLA-B*18:01	HLA-C*07:01	98	98	100	10	10	11
HLA-A*01:01	HLA-B*18:01	HLA-C*07:02	107	107	109	10	10	11
HLA-A*01:01	HLA-B*18:01	HLA-C*08:01	98	98	100	10	10	11
HLA-A*01:01	HLA-B*18:01	HLA-C*08:02	114	114	115	11	11	12
HLA-A*01:01	HLA-B*18:01	HLA-C*12:02	126	126	128	13	13	14
HLA-A*01:01	HLA-B*18:01	HLA-C*12:03	199	198	203	25	25	28
HLA-A*01:01	HLA-B*18:01	HLA-C*14:02	292	290	297	26	26	29
HLA-A*01:01	HLA-B*18:01	HLA-C*15:02	122	122	125	13	13	15
HLA-A*01:01	HLA-B*18:01	HLA-C*16:01	242	242	245	30	30	32
HLA-A*01:01	HLA-B*18:01	HLA-C*17:01	114	114	116	12	12	13
HLA-A*01:01	HLA-B*27:05	HLA-C*01:02	113	116	112	13	16	12
HLA-A*01:01	HLA-B*27:05	HLA-C*02:02	117	120	117	12	15	12
HLA-A*01:01	HLA-B*27:05	HLA-C*02:10	117	120	117	12	15	12
HLA-A*01:01	HLA-B*27:05	HLA-C*03:02	299	302	299	37	40	37
HLA-A*01:01	HLA-B*27:05	HLA-C*03:03	214	217	214	25	28	25
HLA-A*01:01	HLA-B*27:05	HLA-C*03:04	214	217	214	25	28	25
HLA-A*01:01	HLA-B*27:05	HLA-C*04:01	107	110	107	11	14	11
HLA-A*01:01	HLA-B*27:05	HLA-C*05:01	134	137	133	12	15	12
HLA-A*01:01	HLA-B*27:05	HLA-C*06:02	112	115	112	12	15	12
HLA-A*01:01	HLA-B*27:05	HLA-C*07:01	108	111	108	11	14	11
HLA-A*01:01	HLA-B*27:05	HLA-C*07:02	117	120	117	11	14	11
HLA-A*01:01	HLA-B*27:05	HLA-C*08:01	109	112	109	11	14	11
HLA-A*01:01	HLA-B*27:05	HLA-C*08:02	125	128	124	12	15	12
HLA-A*01:01	HLA-B*27:05	HLA-C*12:02	137	140	137	14	17	14
HLA-A*01:01	HLA-B*27:05	HLA-C*12:03	210	212	212	26	29	28
HLA-A*01:01	HLA-B*27:05	HLA-C*14:02	302	303	305	27	30	29
HLA-A*01:01	HLA-B*27:05	HLA-C*15:02	133	136	134	14	17	15
HLA-A*01:01	HLA-B*27:05	HLA-C*16:01	253	256	254	31	34	32
HLA-A*01:01	HLA-B*27:05	HLA-C*17:01	125	128	125	13	16	13
HLA-A*01:01	HLA-B*35:01	HLA-C*01:02	174	176	175	28	28	28
HLA-A*01:01	HLA-B*35:01	HLA-C*02:02	172	174	174	27	27	28
HLA-A*01:01	HLA-B*35:01	HLA-C*02:10	172	174	174	27	27	28
HLA-A*01:01	HLA-B*35:01	HLA-C*03:02	315	317	317	44	44	45
HLA-A*01:01	HLA-B*35:01	HLA-C*03:03	264	266	266	38	38	39
HLA-A*01:01	HLA-B*35:01	HLA-C*03:04	264	266	266	38	38	39
HLA-A*01:01	HLA-B*35:01	HLA-C*04:01	168	170	170	26	26	27
HLA-A*01:01	HLA-B*35:01	HLA-C*05:01	194	196	195	27	27	28
HLA-A*01:01	HLA-B*35:01	HLA-C*06:02	174	176	176	27	27	28
HLA-A*01:01	HLA-B*35:01	HLA-C*07:01	170	172	172	26	26	27
HLA-A*01:01	HLA-B*35:01	HLA-C*07:02	179	181	181	26	26	27
HLA-A*01:01	HLA-B*35:01	HLA-C*08:01	169	171	171	26	26	27
HLA-A*01:01	HLA-B*35:01	HLA-C*08:02	185	187	186	27	27	28
HLA-A*01:01	HLA-B*35:01	HLA-C*12:02	185	187	187	27	27	28
HLA-A*01:01	HLA-B*35:01	HLA-C*12:03	254	255	258	36	36	39
HLA-A*01:01	HLA-B*35:01	HLA-C*14:02	360	360	365	42	42	45
HLA-A*01:01	HLA-B*35:01	HLA-C*15:02	194	196	197	29	29	31
HLA-A*01:01	HLA-B*35:01	HLA-C*16:01	290	292	293	41	41	43
HLA-A*01:01	HLA-B*35:01	HLA-C*17:01	185	187	187	28	28	29
HLA-A*01:01	HLA-B*35:03	HLA-C*01:02	72	73	72	8	8	7
HLA-A*01:01	HLA-B*35:03	HLA-C*02:02	76	77	77	7	7	7
HLA-A*01:01	HLA-B*35:03	HLA-C*02:10	76	77	77	7	7	7
HLA-A*01:01	HLA-B*35:03	HLA-C*03:02	258	259	259	32	32	32
HLA-A*01:01	HLA-B*35:03	HLA-C*03:03	173	174	174	20	20	20
HLA-A*01:01	HLA-B*35:03	HLA-C*03:04	173	174	174	20	20	20
HLA-A*01:01	HLA-B*35:03	HLA-C*04:01	66	67	67	6	6	6
HLA-A*01:01	HLA-B*35:03	HLA-C*05:01	93	94	93	7	7	7
HLA-A*01:01	HLA-B*35:03	HLA-C*06:02	72	73	73	7	7	7
HLA-A*01:01	HLA-B*35:03	HLA-C*07:01	68	69	69	6	6	6
HLA-A*01:01	HLA-B*35:03	HLA-C*07:02	77	78	78	6	6	6
HLA-A*01:01	HLA-B*35:03	HLA-C*08:01	68	69	69	6	6	6
HLA-A*01:01	HLA-B*35:03	HLA-C*08:02	84	85	84	7	7	7
HLA-A*01:01	HLA-B*35:03	HLA-C*12:02	96	97	97	9	9	9
HLA-A*01:01	HLA-B*35:03	HLA-C*12:03	169	169	172	21	21	23
HLA-A*01:01	HLA-B*35:03	HLA-C*14:02	262	261	266	22	22	24
HLA-A*01:01	HLA-B*35:03	HLA-C*15:02	92	93	94	9	9	10
HLA-A*01:01	HLA-B*35:03	HLA-C*16:01	212	213	214	26	26	27
HLA-A*01:01	HLA-B*35:03	HLA-C*17:01	84	85	85	8	8	8
HLA-A*01:01	HLA-B*38:01	HLA-C*01:02	72	72	71	8	8	7
HLA-A*01:01	HLA-B*38:01	HLA-C*02:02	76	76	76	7	7	7
HLA-A*01:01	HLA-B*38:01	HLA-C*02:10	76	76	76	7	7	7
HLA-A*01:01	HLA-B*38:01	HLA-C*03:02	258	258	258	32	32	32
HLA-A*01:01	HLA-B*38:01	HLA-C*03:03	173	173	173	20	20	20
HLA-A*01:01	HLA-B*38:01	HLA-C*03:04	173	173	173	20	20	20
HLA-A*01:01	HLA-B*38:01	HLA-C*04:01	66	66	66	6	6	6
HLA-A*01:01	HLA-B*38:01	HLA-C*05:01	93	93	92	7	7	7
HLA-A*01:01	HLA-B*38:01	HLA-C*06:02	72	72	72	7	7	7
HLA-A*01:01	HLA-B*38:01	HLA-C*07:01	68	68	68	6	6	6
HLA-A*01:01	HLA-B*38:01	HLA-C*07:02	77	77	77	6	6	6
HLA-A*01:01	HLA-B*38:01	HLA-C*08:01	68	68	68	6	6	6
HLA-A*01:01	HLA-B*38:01	HLA-C*08:02	84	84	83	7	7	7
HLA-A*01:01	HLA-B*38:01	HLA-C*12:02	96	96	96	9	9	9
HLA-A*01:01	HLA-B*38:01	HLA-C*12:03	169	168	171	21	21	23
HLA-A*01:01	HLA-B*38:01	HLA-C*14:02	262	260	265	22	22	24
HLA-A*01:01	HLA-B*38:01	HLA-C*15:02	92	92	93	9	9	10
HLA-A*01:01	HLA-B*38:01	HLA-C*16:01	212	212	213	26	26	27
HLA-A*01:01	HLA-B*38:01	HLA-C*17:01	84	84	84	8	8	8
HLA-A*01:01	HLA-B*40:01	HLA-C*01:02	133	134	131	10	10	9
HLA-A*01:01	HLA-B*40:01	HLA-C*02:02	137	138	136	9	9	9
HLA-A*01:01	HLA-B*40:01	HLA-C*02:10	137	138	136	9	9	9
HLA-A*01:01	HLA-B*40:01	HLA-C*03:02	319	320	318	34	34	34
HLA-A*01:01	HLA-B*40:01	HLA-C*03:03	234	235	233	22	22	22
HLA-A*01:01	HLA-B*40:01	HLA-C*03:04	234	235	233	22	22	22
HLA-A*01:01	HLA-B*40:01	HLA-C*04:01	127	128	126	8	8	8
HLA-A*01:01	HLA-B*40:01	HLA-C*05:01	154	155	152	9	9	9
HLA-A*01:01	HLA-B*40:01	HLA-C*06:02	133	134	132	9	9	9
HLA-A*01:01	HLA-B*40:01	HLA-C*07:01	129	130	128	8	8	8
HLA-A*01:01	HLA-B*40:01	HLA-C*07:02	138	139	137	8	8	8
HLA-A*01:01	HLA-B*40:01	HLA-C*08:01	129	130	128	8	8	8
HLA-A*01:01	HLA-B*40:01	HLA-C*08:02	145	146	143	9	9	9
HLA-A*01:01	HLA-B*40:01	HLA-C*12:02	157	158	156	11	11	11
HLA-A*01:01	HLA-B*40:01	HLA-C*12:03	230	230	231	23	23	25
HLA-A*01:01	HLA-B*40:01	HLA-C*14:02	323	322	325	24	24	26
HLA-A*01:01	HLA-B*40:01	HLA-C*15:02	153	154	153	11	11	12
HLA-A*01:01	HLA-B*40:01	HLA-C*16:01	273	274	273	28	28	29
HLA-A*01:01	HLA-B*40:01	HLA-C*17:01	145	146	144	10	10	10
HLA-A*01:01	HLA-B*40:02	HLA-C*01:02	140	141	138	15	15	13
HLA-A*01:01	HLA-B*40:02	HLA-C*02:02	144	145	143	14	14	13
HLA-A*01:01	HLA-B*40:02	HLA-C*02:10	144	145	143	14	14	13
HLA-A*01:01	HLA-B*40:02	HLA-C*03:02	326	327	325	39	39	38
HLA-A*01:01	HLA-B*40:02	HLA-C*03:03	241	242	240	27	27	26
HLA-A*01:01	HLA-B*40:02	HLA-C*03:04	241	242	240	27	27	26
HLA-A*01:01	HLA-B*40:02	HLA-C*04:01	134	135	133	13	13	12
HLA-A*01:01	HLA-B*40:02	HLA-C*05:01	161	162	159	14	14	13
HLA-A*01:01	HLA-B*40:02	HLA-C*06:02	140	141	139	14	14	13
HLA-A*01:01	HLA-B*40:02	HLA-C*07:01	136	137	135	13	13	12
HLA-A*01:01	HLA-B*40:02	HLA-C*07:02	145	146	144	13	13	12
HLA-A*01:01	HLA-B*40:02	HLA-C*08:01	136	137	135	13	13	12
HLA-A*01:01	HLA-B*40:02	HLA-C*08:02	152	153	150	14	14	13
HLA-A*01:01	HLA-B*40:02	HLA-C*12:02	164	165	163	16	16	15
HLA-A*01:01	HLA-B*40:02	HLA-C*12:03	237	237	238	28	28	29
HLA-A*01:01	HLA-B*40:02	HLA-C*14:02	330	329	332	29	29	30
HLA-A*01:01	HLA-B*40:02	HLA-C*15:02	160	161	160	16	16	16
HLA-A*01:01	HLA-B*40:02	HLA-C*16:01	280	281	280	33	33	33
HLA-A*01:01	HLA-B*40:02	HLA-C*17:01	152	153	151	15	15	14
HLA-A*01:01	HLA-B*40:06	HLA-C*01:02	79	79	78	9	9	8
HLA-A*01:01	HLA-B*40:06	HLA-C*02:02	83	83	83	8	8	8
HLA-A*01:01	HLA-B*40:06	HLA-C*02:10	83	83	83	8	8	8
HLA-A*01:01	HLA-B*40:06	HLA-C*03:02	265	265	265	33	33	33
HLA-A*01:01	HLA-B*40:06	HLA-C*03:03	180	180	180	21	21	21
HLA-A*01:01	HLA-B*40:06	HLA-C*03:04	180	180	180	21	21	21
HLA-A*01:01	HLA-B*40:06	HLA-C*04:01	73	73	73	7	7	7
HLA-A*01:01	HLA-B*40:06	HLA-C*05:01	100	100	99	8	8	8
HLA-A*01:01	HLA-B*40:06	HLA-C*06:02	79	79	79	8	8	8
HLA-A*01:01	HLA-B*40:06	HLA-C*07:01	75	75	75	7	7	7
HLA-A*01:01	HLA-B*40:06	HLA-C*07:02	84	84	84	7	7	7
HLA-A*01:01	HLA-B*40:06	HLA-C*08:01	75	75	75	7	7	7
HLA-A*01:01	HLA-B*40:06	HLA-C*08:02	91	91	90	8	8	8
HLA-A*01:01	HLA-B*40:06	HLA-C*12:02	103	103	103	10	10	10
HLA-A*01:01	HLA-B*40:06	HLA-C*12:03	176	175	178	22	22	24
HLA-A*01:01	HLA-B*40:06	HLA-C*14:02	269	267	272	23	23	25
HLA-A*01:01	HLA-B*40:06	HLA-C*15:02	99	99	100	10	10	11
HLA-A*01:01	HLA-B*40:06	HLA-C*16:01	219	219	220	27	27	28
HLA-A*01:01	HLA-B*40:06	HLA-C*17:01	91	91	91	9	9	9
HLA-A*01:01	HLA-B*42:01	HLA-C*01:02	175	174	174	21	18	17
HLA-A*01:01	HLA-B*42:01	HLA-C*02:02	179	178	179	20	17	17
HLA-A*01:01	HLA-B*42:01	HLA-C*02:10	179	178	179	20	17	17
HLA-A*01:01	HLA-B*42:01	HLA-C*03:02	359	358	359	44	41	41
HLA-A*01:01	HLA-B*42:01	HLA-C*03:03	274	273	274	32	29	29
HLA-A*01:01	HLA-B*42:01	HLA-C*03:04	274	273	274	32	29	29
HLA-A*01:01	HLA-B*42:01	HLA-C*04:01	169	168	169	19	16	16
HLA-A*01:01	HLA-B*42:01	HLA-C*05:01	196	195	195	20	17	17
HLA-A*01:01	HLA-B*42:01	HLA-C*06:02	175	174	175	20	17	17
HLA-A*01:01	HLA-B*42:01	HLA-C*07:01	171	170	171	19	16	16
HLA-A*01:01	HLA-B*42:01	HLA-C*07:02	180	179	180	19	16	16
HLA-A*01:01	HLA-B*42:01	HLA-C*08:01	171	170	171	19	16	16
HLA-A*01:01	HLA-B*42:01	HLA-C*08:02	187	186	186	20	17	17
HLA-A*01:01	HLA-B*42:01	HLA-C*12:02	199	198	199	22	19	19
HLA-A*01:01	HLA-B*42:01	HLA-C*12:03	271	269	273	34	31	33
HLA-A*01:01	HLA-B*42:01	HLA-C*14:02	364	361	367	34	31	33
HLA-A*01:01	HLA-B*42:01	HLA-C*15:02	195	194	196	22	19	20
HLA-A*01:01	HLA-B*42:01	HLA-C*16:01	314	313	315	39	36	37
HLA-A*01:01	HLA-B*42:01	HLA-C*17:01	187	186	187	21	18	18
HLA-A*01:01	HLA-B*44:02	HLA-C*01:02	95	96	94	13	13	11
HLA-A*01:01	HLA-B*44:02	HLA-C*02:02	99	100	99	12	12	11
HLA-A*01:01	HLA-B*44:02	HLA-C*02:10	99	100	99	12	12	11
HLA-A*01:01	HLA-B*44:02	HLA-C*03:02	281	282	281	37	37	36
HLA-A*01:01	HLA-B*44:02	HLA-C*03:03	196	197	196	25	25	24
HLA-A*01:01	HLA-B*44:02	HLA-C*03:04	196	197	196	25	25	24
HLA-A*01:01	HLA-B*44:02	HLA-C*04:01	89	90	89	11	11	10
HLA-A*01:01	HLA-B*44:02	HLA-C*05:01	116	117	115	12	12	11
HLA-A*01:01	HLA-B*44:02	HLA-C*06:02	95	96	95	12	12	11
HLA-A*01:01	HLA-B*44:02	HLA-C*07:01	91	92	91	11	11	10
HLA-A*01:01	HLA-B*44:02	HLA-C*07:02	100	101	100	11	11	10
HLA-A*01:01	HLA-B*44:02	HLA-C*08:01	91	92	91	11	11	10
HLA-A*01:01	HLA-B*44:02	HLA-C*08:02	107	108	106	12	12	11
HLA-A*01:01	HLA-B*44:02	HLA-C*12:02	119	120	119	14	14	13
HLA-A*01:01	HLA-B*44:02	HLA-C*12:03	192	192	194	26	26	27
HLA-A*01:01	HLA-B*44:02	HLA-C*14:02	285	284	288	27	27	28
HLA-A*01:01	HLA-B*44:02	HLA-C*15:02	115	116	116	14	14	14
HLA-A*01:01	HLA-B*44:02	HLA-C*16:01	235	236	236	31	31	31
HLA-A*01:01	HLA-B*44:02	HLA-C*17:01	107	108	107	13	13	12
HLA-A*01:01	HLA-B*44:03	HLA-C*01:02	96	97	95	11	11	9
HLA-A*01:01	HLA-B*44:03	HLA-C*02:02	100	101	100	10	10	9
HLA-A*01:01	HLA-B*44:03	HLA-C*02:10	100	101	100	10	10	9
HLA-A*01:01	HLA-B*44:03	HLA-C*03:02	282	283	282	35	35	34
HLA-A*01:01	HLA-B*44:03	HLA-C*03:03	197	198	197	23	23	22
HLA-A*01:01	HLA-B*44:03	HLA-C*03:04	197	198	197	23	23	22
HLA-A*01:01	HLA-B*44:03	HLA-C*04:01	90	91	90	9	9	8
HLA-A*01:01	HLA-B*44:03	HLA-C*05:01	117	118	116	10	10	9
HLA-A*01:01	HLA-B*44:03	HLA-C*06:02	96	97	96	10	10	9
HLA-A*01:01	HLA-B*44:03	HLA-C*07:01	92	93	92	9	9	8
HLA-A*01:01	HLA-B*44:03	HLA-C*07:02	101	102	101	9	9	8
HLA-A*01:01	HLA-B*44:03	HLA-C*08:01	92	93	92	9	9	8
HLA-A*01:01	HLA-B*44:03	HLA-C*08:02	108	109	107	10	10	9
HLA-A*01:01	HLA-B*44:03	HLA-C*12:02	120	121	120	12	12	11
HLA-A*01:01	HLA-B*44:03	HLA-C*12:03	193	193	195	24	24	25
HLA-A*01:01	HLA-B*44:03	HLA-C*14:02	286	285	289	25	25	26
HLA-A*01:01	HLA-B*44:03	HLA-C*15:02	116	117	117	12	12	12
HLA-A*01:01	HLA-B*44:03	HLA-C*16:01	236	237	237	29	29	29
HLA-A*01:01	HLA-B*44:03	HLA-C*17:01	108	109	108	11	11	10
HLA-A*01:01	HLA-B*45:01	HLA-C*01:02	90	90	89	12	12	11
HLA-A*01:01	HLA-B*45:01	HLA-C*02:02	94	94	94	11	11	11
HLA-A*01:01	HLA-B*45:01	HLA-C*02:10	94	94	94	11	11	11
HLA-A*01:01	HLA-B*45:01	HLA-C*03:02	276	276	276	36	36	36
HLA-A*01:01	HLA-B*45:01	HLA-C*03:03	191	191	191	24	24	24
HLA-A*01:01	HLA-B*45:01	HLA-C*03:04	191	191	191	24	24	24
HLA-A*01:01	HLA-B*45:01	HLA-C*04:01	84	84	84	10	10	10
HLA-A*01:01	HLA-B*45:01	HLA-C*05:01	111	111	110	11	11	11
HLA-A*01:01	HLA-B*45:01	HLA-C*06:02	90	90	90	11	11	11
HLA-A*01:01	HLA-B*45:01	HLA-C*07:01	86	86	86	10	10	10
HLA-A*01:01	HLA-B*45:01	HLA-C*07:02	95	95	95	10	10	10
HLA-A*01:01	HLA-B*45:01	HLA-C*08:01	86	86	86	10	10	10
HLA-A*01:01	HLA-B*45:01	HLA-C*08:02	102	102	101	11	11	11
HLA-A*01:01	HLA-B*45:01	HLA-C*12:02	114	114	114	13	13	13
HLA-A*01:01	HLA-B*45:01	HLA-C*12:03	187	186	189	25	25	27
HLA-A*01:01	HLA-B*45:01	HLA-C*14:02	280	278	283	26	26	28
HLA-A*01:01	HLA-B*45:01	HLA-C*15:02	110	110	111	13	13	14
HLA-A*01:01	HLA-B*45:01	HLA-C*16:01	230	230	231	30	30	31
HLA-A*01:01	HLA-B*45:01	HLA-C*17:01	102	102	102	12	12	12
HLA-A*01:01	HLA-B*50:01	HLA-C*01:02	80	80	79	9	9	8
HLA-A*01:01	HLA-B*50:01	HLA-C*02:02	84	84	84	8	8	8
HLA-A*01:01	HLA-B*50:01	HLA-C*02:10	84	84	84	8	8	8
HLA-A*01:01	HLA-B*50:01	HLA-C*03:02	266	266	266	33	33	33
HLA-A*01:01	HLA-B*50:01	HLA-C*03:03	181	181	181	21	21	21
HLA-A*01:01	HLA-B*50:01	HLA-C*03:04	181	181	181	21	21	21
HLA-A*01:01	HLA-B*50:01	HLA-C*04:01	74	74	74	7	7	7
HLA-A*01:01	HLA-B*50:01	HLA-C*05:01	101	101	100	8	8	8
HLA-A*01:01	HLA-B*50:01	HLA-C*06:02	80	80	80	8	8	8
HLA-A*01:01	HLA-B*50:01	HLA-C*07:01	76	76	76	7	7	7
HLA-A*01:01	HLA-B*50:01	HLA-C*07:02	85	85	85	7	7	7
HLA-A*01:01	HLA-B*50:01	HLA-C*08:01	76	76	76	7	7	7
HLA-A*01:01	HLA-B*50:01	HLA-C*08:02	92	92	91	8	8	8
HLA-A*01:01	HLA-B*50:01	HLA-C*12:02	104	104	104	10	10	10
HLA-A*01:01	HLA-B*50:01	HLA-C*12:03	177	176	179	22	22	24
HLA-A*01:01	HLA-B*50:01	HLA-C*14:02	270	268	273	23	23	25
HLA-A*01:01	HLA-B*50:01	HLA-C*15:02	100	100	101	10	10	11
HLA-A*01:01	HLA-B*50:01	HLA-C*16:01	220	220	221	27	27	28
HLA-A*01:01	HLA-B*50:01	HLA-C*17:01	92	92	92	9	9	9
HLA-A*01:01	HLA-B*51:01	HLA-C*01:02	72	72	71	8	8	7
HLA-A*01:01	HLA-B*51:01	HLA-C*02:02	76	76	76	7	7	7
HLA-A*01:01	HLA-B*51:01	HLA-C*02:10	76	76	76	7	7	7
HLA-A*01:01	HLA-B*51:01	HLA-C*03:02	258	258	258	32	32	32
HLA-A*01:01	HLA-B*51:01	HLA-C*03:03	173	173	173	20	20	20
HLA-A*01:01	HLA-B*51:01	HLA-C*03:04	173	173	173	20	20	20
HLA-A*01:01	HLA-B*51:01	HLA-C*04:01	66	66	66	6	6	6
HLA-A*01:01	HLA-B*51:01	HLA-C*05:01	93	93	92	7	7	7
HLA-A*01:01	HLA-B*51:01	HLA-C*06:02	72	72	72	7	7	7
HLA-A*01:01	HLA-B*51:01	HLA-C*07:01	68	68	68	6	6	6
HLA-A*01:01	HLA-B*51:01	HLA-C*07:02	77	77	77	6	6	6
HLA-A*01:01	HLA-B*51:01	HLA-C*08:01	68	68	68	6	6	6
HLA-A*01:01	HLA-B*51:01	HLA-C*08:02	84	84	83	7	7	7
HLA-A*01:01	HLA-B*51:01	HLA-C*12:02	96	96	96	9	9	9
HLA-A*01:01	HLA-B*51:01	HLA-C*12:03	169	168	171	21	21	23
HLA-A*01:01	HLA-B*51:01	HLA-C*14:02	262	260	265	22	22	24
HLA-A*01:01	HLA-B*51:01	HLA-C*15:02	92	92	93	9	9	10
HLA-A*01:01	HLA-B*51:01	HLA-C*16:01	212	212	213	26	26	27
HLA-A*01:01	HLA-B*51:01	HLA-C*17:01	84	84	84	8	8	8
HLA-A*01:01	HLA-B*52:01	HLA-C*01:02	70	70	69	8	8	7
HLA-A*01:01	HLA-B*52:01	HLA-C*02:02	74	74	74	7	7	7
HLA-A*01:01	HLA-B*52:01	HLA-C*02:10	74	74	74	7	7	7
HLA-A*01:01	HLA-B*52:01	HLA-C*03:02	256	256	256	32	32	32
HLA-A*01:01	HLA-B*52:01	HLA-C*03:03	171	171	171	20	20	20
HLA-A*01:01	HLA-B*52:01	HLA-C*03:04	171	171	171	20	20	20
HLA-A*01:01	HLA-B*52:01	HLA-C*04:01	64	64	64	6	6	6
HLA-A*01:01	HLA-B*52:01	HLA-C*05:01	91	91	90	7	7	7
HLA-A*01:01	HLA-B*52:01	HLA-C*06:02	70	70	70	7	7	7
HLA-A*01:01	HLA-B*52:01	HLA-C*07:01	66	66	66	6	6	6
HLA-A*01:01	HLA-B*52:01	HLA-C*07:02	75	75	75	6	6	6
HLA-A*01:01	HLA-B*52:01	HLA-C*08:01	66	66	66	6	6	6
HLA-A*01:01	HLA-B*52:01	HLA-C*08:02	82	82	81	7	7	7
HLA-A*01:01	HLA-B*52:01	HLA-C*12:02	94	94	94	9	9	9
HLA-A*01:01	HLA-B*52:01	HLA-C*12:03	167	166	169	21	21	23
HLA-A*01:01	HLA-B*52:01	HLA-C*14:02	260	258	263	22	22	24
HLA-A*01:01	HLA-B*52:01	HLA-C*15:02	90	90	91	9	9	10
HLA-A*01:01	HLA-B*52:01	HLA-C*16:01	210	210	211	26	26	27
HLA-A*01:01	HLA-B*52:01	HLA-C*17:01	82	82	82	8	8	8
HLA-A*01:01	HLA-B*53:01	HLA-C*01:02	111	111	110	19	19	18
HLA-A*01:01	HLA-B*53:01	HLA-C*02:02	115	115	115	18	18	18
HLA-A*01:01	HLA-B*53:01	HLA-C*02:10	115	115	115	18	18	18
HLA-A*01:01	HLA-B*53:01	HLA-C*03:02	295	295	295	42	42	42
HLA-A*01:01	HLA-B*53:01	HLA-C*03:03	211	211	211	30	30	30
HLA-A*01:01	HLA-B*53:01	HLA-C*03:04	211	211	211	30	30	30
HLA-A*01:01	HLA-B*53:01	HLA-C*04:01	105	105	105	17	17	17
HLA-A*01:01	HLA-B*53:01	HLA-C*05:01	132	132	131	18	18	18
HLA-A*01:01	HLA-B*53:01	HLA-C*06:02	111	111	111	18	18	18
HLA-A*01:01	HLA-B*53:01	HLA-C*07:01	107	107	107	17	17	17
HLA-A*01:01	HLA-B*53:01	HLA-C*07:02	116	116	116	17	17	17
HLA-A*01:01	HLA-B*53:01	HLA-C*08:01	107	107	107	17	17	17
HLA-A*01:01	HLA-B*53:01	HLA-C*08:02	123	123	122	18	18	18
HLA-A*01:01	HLA-B*53:01	HLA-C*12:02	134	134	134	19	19	19
HLA-A*01:01	HLA-B*53:01	HLA-C*12:03	207	206	209	31	31	33
HLA-A*01:01	HLA-B*53:01	HLA-C*14:02	301	299	304	33	33	35
HLA-A*01:01	HLA-B*53:01	HLA-C*15:02	131	131	132	20	20	21
HLA-A*01:01	HLA-B*53:01	HLA-C*16:01	250	250	251	36	36	37
HLA-A*01:01	HLA-B*53:01	HLA-C*17:01	123	123	123	19	19	19
HLA-A*01:01	HLA-B*57:01	HLA-C*01:02	132	132	132	14	14	14
HLA-A*01:01	HLA-B*57:01	HLA-C*02:02	136	136	137	13	13	14
HLA-A*01:01	HLA-B*57:01	HLA-C*02:10	136	136	137	13	13	14
HLA-A*01:01	HLA-B*57:01	HLA-C*03:02	314	314	314	38	38	38
HLA-A*01:01	HLA-B*57:01	HLA-C*03:03	232	232	233	26	26	27
HLA-A*01:01	HLA-B*57:01	HLA-C*03:04	232	232	233	26	26	27
HLA-A*01:01	HLA-B*57:01	HLA-C*04:01	126	126	127	12	12	13
HLA-A*01:01	HLA-B*57:01	HLA-C*05:01	153	153	153	13	13	14
HLA-A*01:01	HLA-B*57:01	HLA-C*06:02	132	132	133	13	13	14
HLA-A*01:01	HLA-B*57:01	HLA-C*07:01	128	128	129	12	12	13
HLA-A*01:01	HLA-B*57:01	HLA-C*07:02	137	137	138	12	12	13
HLA-A*01:01	HLA-B*57:01	HLA-C*08:01	128	128	129	12	12	13
HLA-A*01:01	HLA-B*57:01	HLA-C*08:02	144	144	144	13	13	14
HLA-A*01:01	HLA-B*57:01	HLA-C*12:02	155	155	156	15	15	16
HLA-A*01:01	HLA-B*57:01	HLA-C*12:03	228	227	230	27	27	29
HLA-A*01:01	HLA-B*57:01	HLA-C*14:02	322	320	326	28	28	31
HLA-A*01:01	HLA-B*57:01	HLA-C*15:02	152	152	154	15	15	17
HLA-A*01:01	HLA-B*57:01	HLA-C*16:01	270	270	271	32	32	33
HLA-A*01:01	HLA-B*57:01	HLA-C*17:01	144	144	145	14	14	15
HLA-A*01:01	HLA-B*58:01	HLA-C*01:02	220	220	222	22	22	23
HLA-A*01:01	HLA-B*58:01	HLA-C*02:02	222	222	225	21	21	23
HLA-A*01:01	HLA-B*58:01	HLA-C*02:10	222	222	225	21	21	23
HLA-A*01:01	HLA-B*58:01	HLA-C*03:02	393	393	395	43	43	44
HLA-A*01:01	HLA-B*58:01	HLA-C*03:03	314	314	317	31	31	33
HLA-A*01:01	HLA-B*58:01	HLA-C*03:04	314	314	317	31	31	33
HLA-A*01:01	HLA-B*58:01	HLA-C*04:01	214	214	217	20	20	22
HLA-A*01:01	HLA-B*58:01	HLA-C*05:01	241	241	243	21	21	23
HLA-A*01:01	HLA-B*58:01	HLA-C*06:02	220	220	223	21	21	23
HLA-A*01:01	HLA-B*58:01	HLA-C*07:01	216	216	219	20	20	22
HLA-A*01:01	HLA-B*58:01	HLA-C*07:02	225	225	228	20	20	22
HLA-A*01:01	HLA-B*58:01	HLA-C*08:01	216	216	219	20	20	22
HLA-A*01:01	HLA-B*58:01	HLA-C*08:02	232	232	234	21	21	23
HLA-A*01:01	HLA-B*58:01	HLA-C*12:02	239	239	242	21	21	23
HLA-A*01:01	HLA-B*58:01	HLA-C*12:03	309	308	313	32	32	35
HLA-A*01:01	HLA-B*58:01	HLA-C*14:02	409	407	415	36	36	40
HLA-A*01:01	HLA-B*58:01	HLA-C*15:02	237	237	241	23	23	26
HLA-A*01:01	HLA-B*58:01	HLA-C*16:01	349	349	352	37	37	39
HLA-A*01:01	HLA-B*58:01	HLA-C*17:01	230	230	233	22	22	24
HLA-A*01:01	HLA-B*58:02	HLA-C*01:02	70	70	69	8	8	7
HLA-A*01:01	HLA-B*58:02	HLA-C*02:02	74	74	74	7	7	7
HLA-A*01:01	HLA-B*58:02	HLA-C*02:10	74	74	74	7	7	7
HLA-A*01:01	HLA-B*58:02	HLA-C*03:02	256	256	256	32	32	32
HLA-A*01:01	HLA-B*58:02	HLA-C*03:03	171	171	171	20	20	20
HLA-A*01:01	HLA-B*58:02	HLA-C*03:04	171	171	171	20	20	20
HLA-A*01:01	HLA-B*58:02	HLA-C*04:01	64	64	64	6	6	6
HLA-A*01:01	HLA-B*58:02	HLA-C*05:01	91	91	90	7	7	7
HLA-A*01:01	HLA-B*58:02	HLA-C*06:02	70	70	70	7	7	7
HLA-A*01:01	HLA-B*58:02	HLA-C*07:01	66	66	66	6	6	6
HLA-A*01:01	HLA-B*58:02	HLA-C*07:02	75	75	75	6	6	6
HLA-A*01:01	HLA-B*58:02	HLA-C*08:01	66	66	66	6	6	6
HLA-A*01:01	HLA-B*58:02	HLA-C*08:02	82	82	81	7	7	7
HLA-A*01:01	HLA-B*58:02	HLA-C*12:02	94	94	94	9	9	9
HLA-A*01:01	HLA-B*58:02	HLA-C*12:03	167	166	169	21	21	23
HLA-A*01:01	HLA-B*58:02	HLA-C*14:02	260	258	263	22	22	24
HLA-A*01:01	HLA-B*58:02	HLA-C*15:02	90	90	91	9	9	10
HLA-A*01:01	HLA-B*58:02	HLA-C*16:01	210	210	211	26	26	27
HLA-A*01:01	HLA-B*58:02	HLA-C*17:01	82	82	82	8	8	8
HLA-A*02:01	HLA-B*07:02	HLA-C*01:02	461	471	461	28	24	22
HLA-A*02:01	HLA-B*07:02	HLA-C*02:02	466	476	467	27	23	22
HLA-A*02:01	HLA-B*07:02	HLA-C*02:10	466	476	467	27	23	22
HLA-A*02:01	HLA-B*07:02	HLA-C*03:02	646	656	647	54	50	49
HLA-A*02:01	HLA-B*07:02	HLA-C*03:03	553	563	554	39	35	34
HLA-A*02:01	HLA-B*07:02	HLA-C*03:04	553	563	554	39	35	34
HLA-A*02:01	HLA-B*07:02	HLA-C*04:01	456	466	457	26	22	21
HLA-A*02:01	HLA-B*07:02	HLA-C*05:01	478	488	479	27	23	22
HLA-A*02:01	HLA-B*07:02	HLA-C*06:02	462	472	463	27	23	22
HLA-A*02:01	HLA-B*07:02	HLA-C*07:01	458	468	459	26	22	21
HLA-A*02:01	HLA-B*07:02	HLA-C*07:02	467	477	468	26	22	21
HLA-A*02:01	HLA-B*07:02	HLA-C*08:01	458	468	459	26	22	21
HLA-A*02:01	HLA-B*07:02	HLA-C*08:02	470	480	471	27	23	22
HLA-A*02:01	HLA-B*07:02	HLA-C*12:02	485	495	486	29	25	24
HLA-A*02:01	HLA-B*07:02	HLA-C*12:03	553	562	556	40	36	37
HLA-A*02:01	HLA-B*07:02	HLA-C*14:02	647	655	651	42	38	39
HLA-A*02:01	HLA-B*07:02	HLA-C*15:02	481	491	483	29	25	25
HLA-A*02:01	HLA-B*07:02	HLA-C*16:01	601	611	603	47	43	43
HLA-A*02:01	HLA-B*07:02	HLA-C*17:01	468	478	469	27	23	22
HLA-A*02:01	HLA-B*08:01	HLA-C*01:02	440	454	443	24	25	22
HLA-A*02:01	HLA-B*08:01	HLA-C*02:02	445	459	449	23	24	22
HLA-A*02:01	HLA-B*08:01	HLA-C*02:10	445	459	449	23	24	22
HLA-A*02:01	HLA-B*08:01	HLA-C*03:02	620	634	624	50	51	49
HLA-A*02:01	HLA-B*08:01	HLA-C*03:03	528	542	532	35	36	34
HLA-A*02:01	HLA-B*08:01	HLA-C*03:04	528	542	532	35	36	34
HLA-A*02:01	HLA-B*08:01	HLA-C*04:01	435	449	439	22	23	21
HLA-A*02:01	HLA-B*08:01	HLA-C*05:01	457	471	461	23	24	22
HLA-A*02:01	HLA-B*08:01	HLA-C*06:02	441	455	445	23	24	22
HLA-A*02:01	HLA-B*08:01	HLA-C*07:01	437	451	441	22	23	21
HLA-A*02:01	HLA-B*08:01	HLA-C*07:02	446	460	450	22	23	21
HLA-A*02:01	HLA-B*08:01	HLA-C*08:01	437	451	441	22	23	21
HLA-A*02:01	HLA-B*08:01	HLA-C*08:02	449	463	453	23	24	22
HLA-A*02:01	HLA-B*08:01	HLA-C*12:02	462	476	466	25	26	24
HLA-A*02:01	HLA-B*08:01	HLA-C*12:03	527	540	533	36	37	37
HLA-A*02:01	HLA-B*08:01	HLA-C*14:02	624	636	631	38	39	39
HLA-A*02:01	HLA-B*08:01	HLA-C*15:02	459	473	464	25	26	25
HLA-A*02:01	HLA-B*08:01	HLA-C*16:01	575	589	580	43	44	43
HLA-A*02:01	HLA-B*08:01	HLA-C*17:01	447	461	451	23	24	22
HLA-A*02:01	HLA-B*14:02	HLA-C*01:02	407	419	410	22	22	20
HLA-A*02:01	HLA-B*14:02	HLA-C*02:02	412	424	416	21	21	20
HLA-A*02:01	HLA-B*14:02	HLA-C*02:10	412	424	416	21	21	20
HLA-A*02:01	HLA-B*14:02	HLA-C*03:02	593	605	597	48	48	47
HLA-A*02:01	HLA-B*14:02	HLA-C*03:03	500	512	504	33	33	32
HLA-A*02:01	HLA-B*14:02	HLA-C*03:04	500	512	504	33	33	32
HLA-A*02:01	HLA-B*14:02	HLA-C*04:01	402	414	406	20	20	19
HLA-A*02:01	HLA-B*14:02	HLA-C*05:01	424	436	428	21	21	20
HLA-A*02:01	HLA-B*14:02	HLA-C*06:02	408	420	412	21	21	20
HLA-A*02:01	HLA-B*14:02	HLA-C*07:01	404	416	408	20	20	19
HLA-A*02:01	HLA-B*14:02	HLA-C*07:02	413	425	417	20	20	19
HLA-A*02:01	HLA-B*14:02	HLA-C*08:01	404	416	408	20	20	19
HLA-A*02:01	HLA-B*14:02	HLA-C*08:02	416	428	420	21	21	20
HLA-A*02:01	HLA-B*14:02	HLA-C*12:02	431	443	435	23	23	22
HLA-A*02:01	HLA-B*14:02	HLA-C*12:03	500	511	506	34	34	35
HLA-A*02:01	HLA-B*14:02	HLA-C*14:02	593	603	600	36	36	37
HLA-A*02:01	HLA-B*14:02	HLA-C*15:02	427	439	432	23	23	23
HLA-A*02:01	HLA-B*14:02	HLA-C*16:01	548	560	553	41	41	41
HLA-A*02:01	HLA-B*14:02	HLA-C*17:01	414	426	418	21	21	20
HLA-A*02:01	HLA-B*15:01	HLA-C*01:02	575	588	578	37	37	33
HLA-A*02:01	HLA-B*15:01	HLA-C*02:02	578	591	582	36	36	33
HLA-A*02:01	HLA-B*15:01	HLA-C*02:10	578	591	582	36	36	33
HLA-A*02:01	HLA-B*15:01	HLA-C*03:02	721	734	725	59	59	56
HLA-A*02:01	HLA-B*15:01	HLA-C*03:03	662	675	666	48	48	45
HLA-A*02:01	HLA-B*15:01	HLA-C*03:04	662	675	666	48	48	45
HLA-A*02:01	HLA-B*15:01	HLA-C*04:01	570	583	574	35	35	32
HLA-A*02:01	HLA-B*15:01	HLA-C*05:01	592	605	596	36	36	33
HLA-A*02:01	HLA-B*15:01	HLA-C*06:02	576	589	580	36	36	33
HLA-A*02:01	HLA-B*15:01	HLA-C*07:01	572	585	576	35	35	32
HLA-A*02:01	HLA-B*15:01	HLA-C*07:02	581	594	585	35	35	32
HLA-A*02:01	HLA-B*15:01	HLA-C*08:01	572	585	576	35	35	32
HLA-A*02:01	HLA-B*15:01	HLA-C*08:02	584	597	588	36	36	33
HLA-A*02:01	HLA-B*15:01	HLA-C*12:02	596	609	600	38	38	35
HLA-A*02:01	HLA-B*15:01	HLA-C*12:03	663	675	669	49	49	48
HLA-A*02:01	HLA-B*15:01	HLA-C*14:02	756	767	763	51	51	50
HLA-A*02:01	HLA-B*15:01	HLA-C*15:02	595	608	600	38	38	36
HLA-A*02:01	HLA-B*15:01	HLA-C*16:01	704	717	709	54	54	52
HLA-A*02:01	HLA-B*15:01	HLA-C*17:01	582	595	586	36	36	33
HLA-A*02:01	HLA-B*15:03	HLA-C*01:02	866	879	873	81	81	83
HLA-A*02:01	HLA-B*15:03	HLA-C*02:02	865	878	873	80	80	83
HLA-A*02:01	HLA-B*15:03	HLA-C*02:10	865	878	873	80	80	83
HLA-A*02:01	HLA-B*15:03	HLA-C*03:02	954	967	962	90	90	93
HLA-A*02:01	HLA-B*15:03	HLA-C*03:03	940	953	948	88	88	91
HLA-A*02:01	HLA-B*15:03	HLA-C*03:04	940	953	948	88	88	91
HLA-A*02:01	HLA-B*15:03	HLA-C*04:01	861	874	869	79	79	82
HLA-A*02:01	HLA-B*15:03	HLA-C*05:01	883	896	891	80	80	83
HLA-A*02:01	HLA-B*15:03	HLA-C*06:02	867	880	875	80	80	83
HLA-A*02:01	HLA-B*15:03	HLA-C*07:01	863	876	871	79	79	82
HLA-A*02:01	HLA-B*15:03	HLA-C*07:02	871	884	879	79	79	82
HLA-A*02:01	HLA-B*15:03	HLA-C*08:01	863	876	871	79	79	82
HLA-A*02:01	HLA-B*15:03	HLA-C*08:02	875	888	883	80	80	83
HLA-A*02:01	HLA-B*15:03	HLA-C*12:02	873	886	881	80	80	83
HLA-A*02:01	HLA-B*15:03	HLA-C*12:03	930	942	939	86	86	90
HLA-A*02:01	HLA-B*15:03	HLA-C*14:02	1037	1048	1048	94	94	99
HLA-A*02:01	HLA-B*15:03	HLA-C*15:02	884	897	893	82	82	86
HLA-A*02:01	HLA-B*15:03	HLA-C*16:01	956	969	964	90	90	93
HLA-A*02:01	HLA-B*15:03	HLA-C*17:01	872	885	880	80	80	83
HLA-A*02:01	HLA-B*18:01	HLA-C*01:02	438	450	443	26	26	25
HLA-A*02:01	HLA-B*18:01	HLA-C*02:02	443	455	449	25	25	25
HLA-A*02:01	HLA-B*18:01	HLA-C*02:10	443	455	449	25	25	25
HLA-A*02:01	HLA-B*18:01	HLA-C*03:02	624	636	630	52	52	52
HLA-A*02:01	HLA-B*18:01	HLA-C*03:03	531	543	537	37	37	37
HLA-A*02:01	HLA-B*18:01	HLA-C*03:04	531	543	537	37	37	37
HLA-A*02:01	HLA-B*18:01	HLA-C*04:01	433	445	439	24	24	24
HLA-A*02:01	HLA-B*18:01	HLA-C*05:01	455	467	461	25	25	25
HLA-A*02:01	HLA-B*18:01	HLA-C*06:02	439	451	445	25	25	25
HLA-A*02:01	HLA-B*18:01	HLA-C*07:01	435	447	441	24	24	24
HLA-A*02:01	HLA-B*18:01	HLA-C*07:02	444	456	450	24	24	24
HLA-A*02:01	HLA-B*18:01	HLA-C*08:01	435	447	441	24	24	24
HLA-A*02:01	HLA-B*18:01	HLA-C*08:02	447	459	453	25	25	25
HLA-A*02:01	HLA-B*18:01	HLA-C*12:02	462	474	468	27	27	27
HLA-A*02:01	HLA-B*18:01	HLA-C*12:03	531	542	539	38	38	40
HLA-A*02:01	HLA-B*18:01	HLA-C*14:02	624	634	633	40	40	42
HLA-A*02:01	HLA-B*18:01	HLA-C*15:02	458	470	465	27	27	28
HLA-A*02:01	HLA-B*18:01	HLA-C*16:01	579	591	586	45	45	46
HLA-A*02:01	HLA-B*18:01	HLA-C*17:01	445	457	451	25	25	25
HLA-A*02:01	HLA-B*27:05	HLA-C*01:02	448	463	451	27	30	25
HLA-A*02:01	HLA-B*27:05	HLA-C*02:02	453	468	457	26	29	25
HLA-A*02:01	HLA-B*27:05	HLA-C*02:10	453	468	457	26	29	25
HLA-A*02:01	HLA-B*27:05	HLA-C*03:02	634	649	638	53	56	52
HLA-A*02:01	HLA-B*27:05	HLA-C*03:03	541	556	545	38	41	37
HLA-A*02:01	HLA-B*27:05	HLA-C*03:04	541	556	545	38	41	37
HLA-A*02:01	HLA-B*27:05	HLA-C*04:01	443	458	447	25	28	24
HLA-A*02:01	HLA-B*27:05	HLA-C*05:01	465	480	469	26	29	25
HLA-A*02:01	HLA-B*27:05	HLA-C*06:02	448	463	452	26	29	25
HLA-A*02:01	HLA-B*27:05	HLA-C*07:01	444	459	448	25	28	24
HLA-A*02:01	HLA-B*27:05	HLA-C*07:02	453	468	457	25	28	24
HLA-A*02:01	HLA-B*27:05	HLA-C*08:01	445	460	449	25	28	24
HLA-A*02:01	HLA-B*27:05	HLA-C*08:02	457	472	461	26	29	25
HLA-A*02:01	HLA-B*27:05	HLA-C*12:02	472	487	476	28	31	27
HLA-A*02:01	HLA-B*27:05	HLA-C*12:03	541	555	547	39	42	40
HLA-A*02:01	HLA-B*27:05	HLA-C*14:02	633	646	640	41	44	42
HLA-A*02:01	HLA-B*27:05	HLA-C*15:02	468	483	473	28	31	28
HLA-A*02:01	HLA-B*27:05	HLA-C*16:01	589	604	594	46	49	46
HLA-A*02:01	HLA-B*27:05	HLA-C*17:01	455	470	459	26	29	25
HLA-A*02:01	HLA-B*35:01	HLA-C*01:02	513	527	518	42	42	41
HLA-A*02:01	HLA-B*35:01	HLA-C*02:02	511	525	517	41	41	41
HLA-A*02:01	HLA-B*35:01	HLA-C*02:10	511	525	517	41	41	41
HLA-A*02:01	HLA-B*35:01	HLA-C*03:02	652	666	658	60	60	60
HLA-A*02:01	HLA-B*35:01	HLA-C*03:03	595	609	601	51	51	51
HLA-A*02:01	HLA-B*35:01	HLA-C*03:04	595	609	601	51	51	51
HLA-A*02:01	HLA-B*35:01	HLA-C*04:01	508	522	514	40	40	40
HLA-A*02:01	HLA-B*35:01	HLA-C*05:01	529	543	535	41	41	41
HLA-A*02:01	HLA-B*35:01	HLA-C*06:02	514	528	520	41	41	41
HLA-A*02:01	HLA-B*35:01	HLA-C*07:01	510	524	516	40	40	40
HLA-A*02:01	HLA-B*35:01	HLA-C*07:02	519	533	525	40	40	40
HLA-A*02:01	HLA-B*35:01	HLA-C*08:01	509	523	515	40	40	40
HLA-A*02:01	HLA-B*35:01	HLA-C*08:02	521	535	527	41	41	41
HLA-A*02:01	HLA-B*35:01	HLA-C*12:02	523	537	529	41	41	41
HLA-A*02:01	HLA-B*35:01	HLA-C*12:03	588	601	596	49	49	51
HLA-A*02:01	HLA-B*35:01	HLA-C*14:02	695	707	704	56	56	58
HLA-A*02:01	HLA-B*35:01	HLA-C*15:02	533	547	540	43	43	44
HLA-A*02:01	HLA-B*35:01	HLA-C*16:01	628	642	635	56	56	57
HLA-A*02:01	HLA-B*35:01	HLA-C*17:01	519	533	525	41	41	41
HLA-A*02:01	HLA-B*35:03	HLA-C*01:02	408	421	412	22	22	20
HLA-A*02:01	HLA-B*35:03	HLA-C*02:02	413	426	418	21	21	20
HLA-A*02:01	HLA-B*35:03	HLA-C*02:10	413	426	418	21	21	20
HLA-A*02:01	HLA-B*35:03	HLA-C*03:02	594	607	599	48	48	47
HLA-A*02:01	HLA-B*35:03	HLA-C*03:03	501	514	506	33	33	32
HLA-A*02:01	HLA-B*35:03	HLA-C*03:04	501	514	506	33	33	32
HLA-A*02:01	HLA-B*35:03	HLA-C*04:01	403	416	408	20	20	19
HLA-A*02:01	HLA-B*35:03	HLA-C*05:01	425	438	430	21	21	20
HLA-A*02:01	HLA-B*35:03	HLA-C*06:02	409	422	414	21	21	20
HLA-A*02:01	HLA-B*35:03	HLA-C*07:01	405	418	410	20	20	19
HLA-A*02:01	HLA-B*35:03	HLA-C*07:02	414	427	419	20	20	19
HLA-A*02:01	HLA-B*35:03	HLA-C*08:01	405	418	410	20	20	19
HLA-A*02:01	HLA-B*35:03	HLA-C*08:02	417	430	422	21	21	20
HLA-A*02:01	HLA-B*35:03	HLA-C*12:02	432	445	437	23	23	22
HLA-A*02:01	HLA-B*35:03	HLA-C*12:03	501	513	508	34	34	35
HLA-A*02:01	HLA-B*35:03	HLA-C*14:02	594	605	602	36	36	37
HLA-A*02:01	HLA-B*35:03	HLA-C*15:02	428	441	434	23	23	23
HLA-A*02:01	HLA-B*35:03	HLA-C*16:01	549	562	555	41	41	41
HLA-A*02:01	HLA-B*35:03	HLA-C*17:01	415	428	420	21	21	20
HLA-A*02:01	HLA-B*38:01	HLA-C*01:02	408	420	411	22	22	20
HLA-A*02:01	HLA-B*38:01	HLA-C*02:02	413	425	417	21	21	20
HLA-A*02:01	HLA-B*38:01	HLA-C*02:10	413	425	417	21	21	20
HLA-A*02:01	HLA-B*38:01	HLA-C*03:02	594	606	598	48	48	47
HLA-A*02:01	HLA-B*38:01	HLA-C*03:03	501	513	505	33	33	32
HLA-A*02:01	HLA-B*38:01	HLA-C*03:04	501	513	505	33	33	32
HLA-A*02:01	HLA-B*38:01	HLA-C*04:01	403	415	407	20	20	19
HLA-A*02:01	HLA-B*38:01	HLA-C*05:01	425	437	429	21	21	20
HLA-A*02:01	HLA-B*38:01	HLA-C*06:02	409	421	413	21	21	20
HLA-A*02:01	HLA-B*38:01	HLA-C*07:01	405	417	409	20	20	19
HLA-A*02:01	HLA-B*38:01	HLA-C*07:02	414	426	418	20	20	19
HLA-A*02:01	HLA-B*38:01	HLA-C*08:01	405	417	409	20	20	19
HLA-A*02:01	HLA-B*38:01	HLA-C*08:02	417	429	421	21	21	20
HLA-A*02:01	HLA-B*38:01	HLA-C*12:02	432	444	436	23	23	22
HLA-A*02:01	HLA-B*38:01	HLA-C*12:03	501	512	507	34	34	35
HLA-A*02:01	HLA-B*38:01	HLA-C*14:02	594	604	601	36	36	37
HLA-A*02:01	HLA-B*38:01	HLA-C*15:02	428	440	433	23	23	23
HLA-A*02:01	HLA-B*38:01	HLA-C*16:01	549	561	554	41	41	41
HLA-A*02:01	HLA-B*38:01	HLA-C*17:01	415	427	419	21	21	20
HLA-A*02:01	HLA-B*40:01	HLA-C*01:02	469	482	471	24	24	22
HLA-A*02:01	HLA-B*40:01	HLA-C*02:02	474	487	477	23	23	22
HLA-A*02:01	HLA-B*40:01	HLA-C*02:10	474	487	477	23	23	22
HLA-A*02:01	HLA-B*40:01	HLA-C*03:02	655	668	658	50	50	49
HLA-A*02:01	HLA-B*40:01	HLA-C*03:03	562	575	565	35	35	34
HLA-A*02:01	HLA-B*40:01	HLA-C*03:04	562	575	565	35	35	34
HLA-A*02:01	HLA-B*40:01	HLA-C*04:01	464	477	467	22	22	21
HLA-A*02:01	HLA-B*40:01	HLA-C*05:01	486	499	489	23	23	22
HLA-A*02:01	HLA-B*40:01	HLA-C*06:02	470	483	473	23	23	22
HLA-A*02:01	HLA-B*40:01	HLA-C*07:01	466	479	469	22	22	21
HLA-A*02:01	HLA-B*40:01	HLA-C*07:02	475	488	478	22	22	21
HLA-A*02:01	HLA-B*40:01	HLA-C*08:01	466	479	469	22	22	21
HLA-A*02:01	HLA-B*40:01	HLA-C*08:02	478	491	481	23	23	22
HLA-A*02:01	HLA-B*40:01	HLA-C*12:02	493	506	496	25	25	24
HLA-A*02:01	HLA-B*40:01	HLA-C*12:03	562	574	567	36	36	37
HLA-A*02:01	HLA-B*40:01	HLA-C*14:02	655	666	661	38	38	39
HLA-A*02:01	HLA-B*40:01	HLA-C*15:02	489	502	493	25	25	25
HLA-A*02:01	HLA-B*40:01	HLA-C*16:01	610	623	614	43	43	43
HLA-A*02:01	HLA-B*40:01	HLA-C*17:01	476	489	479	23	23	22
HLA-A*02:01	HLA-B*40:02	HLA-C*01:02	476	489	478	29	29	26
HLA-A*02:01	HLA-B*40:02	HLA-C*02:02	481	494	484	28	28	26
HLA-A*02:01	HLA-B*40:02	HLA-C*02:10	481	494	484	28	28	26
HLA-A*02:01	HLA-B*40:02	HLA-C*03:02	662	675	665	55	55	53
HLA-A*02:01	HLA-B*40:02	HLA-C*03:03	569	582	572	40	40	38
HLA-A*02:01	HLA-B*40:02	HLA-C*03:04	569	582	572	40	40	38
HLA-A*02:01	HLA-B*40:02	HLA-C*04:01	471	484	474	27	27	25
HLA-A*02:01	HLA-B*40:02	HLA-C*05:01	493	506	496	28	28	26
HLA-A*02:01	HLA-B*40:02	HLA-C*06:02	477	490	480	28	28	26
HLA-A*02:01	HLA-B*40:02	HLA-C*07:01	473	486	476	27	27	25
HLA-A*02:01	HLA-B*40:02	HLA-C*07:02	482	495	485	27	27	25
HLA-A*02:01	HLA-B*40:02	HLA-C*08:01	473	486	476	27	27	25
HLA-A*02:01	HLA-B*40:02	HLA-C*08:02	485	498	488	28	28	26
HLA-A*02:01	HLA-B*40:02	HLA-C*12:02	500	513	503	30	30	28
HLA-A*02:01	HLA-B*40:02	HLA-C*12:03	569	581	574	41	41	41
HLA-A*02:01	HLA-B*40:02	HLA-C*14:02	662	673	668	43	43	43
HLA-A*02:01	HLA-B*40:02	HLA-C*15:02	496	509	500	30	30	29
HLA-A*02:01	HLA-B*40:02	HLA-C*16:01	617	630	621	48	48	47
HLA-A*02:01	HLA-B*40:02	HLA-C*17:01	483	496	486	28	28	26
HLA-A*02:01	HLA-B*40:06	HLA-C*01:02	415	427	418	23	23	21
HLA-A*02:01	HLA-B*40:06	HLA-C*02:02	420	432	424	22	22	21
HLA-A*02:01	HLA-B*40:06	HLA-C*02:10	420	432	424	22	22	21
HLA-A*02:01	HLA-B*40:06	HLA-C*03:02	601	613	605	49	49	48
HLA-A*02:01	HLA-B*40:06	HLA-C*03:03	508	520	512	34	34	33
HLA-A*02:01	HLA-B*40:06	HLA-C*03:04	508	520	512	34	34	33
HLA-A*02:01	HLA-B*40:06	HLA-C*04:01	410	422	414	21	21	20
HLA-A*02:01	HLA-B*40:06	HLA-C*05:01	432	444	436	22	22	21
HLA-A*02:01	HLA-B*40:06	HLA-C*06:02	416	428	420	22	22	21
HLA-A*02:01	HLA-B*40:06	HLA-C*07:01	412	424	416	21	21	20
HLA-A*02:01	HLA-B*40:06	HLA-C*07:02	421	433	425	21	21	20
HLA-A*02:01	HLA-B*40:06	HLA-C*08:01	412	424	416	21	21	20
HLA-A*02:01	HLA-B*40:06	HLA-C*08:02	424	436	428	22	22	21
HLA-A*02:01	HLA-B*40:06	HLA-C*12:02	439	451	443	24	24	23
HLA-A*02:01	HLA-B*40:06	HLA-C*12:03	508	519	514	35	35	36
HLA-A*02:01	HLA-B*40:06	HLA-C*14:02	601	611	608	37	37	38
HLA-A*02:01	HLA-B*40:06	HLA-C*15:02	435	447	440	24	24	24
HLA-A*02:01	HLA-B*40:06	HLA-C*16:01	556	568	561	42	42	42
HLA-A*02:01	HLA-B*40:06	HLA-C*17:01	422	434	426	22	22	21
HLA-A*02:01	HLA-B*42:01	HLA-C*01:02	511	522	514	35	32	30
HLA-A*02:01	HLA-B*42:01	HLA-C*02:02	516	527	520	34	31	30
HLA-A*02:01	HLA-B*42:01	HLA-C*02:10	516	527	520	34	31	30
HLA-A*02:01	HLA-B*42:01	HLA-C*03:02	695	706	699	60	57	56
HLA-A*02:01	HLA-B*42:01	HLA-C*03:03	602	613	606	45	42	41
HLA-A*02:01	HLA-B*42:01	HLA-C*03:04	602	613	606	45	42	41
HLA-A*02:01	HLA-B*42:01	HLA-C*04:01	506	517	510	33	30	29
HLA-A*02:01	HLA-B*42:01	HLA-C*05:01	528	539	532	34	31	30
HLA-A*02:01	HLA-B*42:01	HLA-C*06:02	512	523	516	34	31	30
HLA-A*02:01	HLA-B*42:01	HLA-C*07:01	508	519	512	33	30	29
HLA-A*02:01	HLA-B*42:01	HLA-C*07:02	517	528	521	33	30	29
HLA-A*02:01	HLA-B*42:01	HLA-C*08:01	508	519	512	33	30	29
HLA-A*02:01	HLA-B*42:01	HLA-C*08:02	520	531	524	34	31	30
HLA-A*02:01	HLA-B*42:01	HLA-C*12:02	535	546	539	36	33	32
HLA-A*02:01	HLA-B*42:01	HLA-C*12:03	603	613	609	47	44	45
HLA-A*02:01	HLA-B*42:01	HLA-C*14:02	696	705	703	48	45	46
HLA-A*02:01	HLA-B*42:01	HLA-C*15:02	531	542	536	36	33	33
HLA-A*02:01	HLA-B*42:01	HLA-C*16:01	651	662	656	54	51	51
HLA-A*02:01	HLA-B*42:01	HLA-C*17:01	518	529	522	34	31	30
HLA-A*02:01	HLA-B*44:02	HLA-C*01:02	431	444	434	27	27	24
HLA-A*02:01	HLA-B*44:02	HLA-C*02:02	436	449	440	26	26	24
HLA-A*02:01	HLA-B*44:02	HLA-C*02:10	436	449	440	26	26	24
HLA-A*02:01	HLA-B*44:02	HLA-C*03:02	617	630	621	53	53	51
HLA-A*02:01	HLA-B*44:02	HLA-C*03:03	524	537	528	38	38	36
HLA-A*02:01	HLA-B*44:02	HLA-C*03:04	524	537	528	38	38	36
HLA-A*02:01	HLA-B*44:02	HLA-C*04:01	426	439	430	25	25	23
HLA-A*02:01	HLA-B*44:02	HLA-C*05:01	448	461	452	26	26	24
HLA-A*02:01	HLA-B*44:02	HLA-C*06:02	432	445	436	26	26	24
HLA-A*02:01	HLA-B*44:02	HLA-C*07:01	428	441	432	25	25	23
HLA-A*02:01	HLA-B*44:02	HLA-C*07:02	437	450	441	25	25	23
HLA-A*02:01	HLA-B*44:02	HLA-C*08:01	428	441	432	25	25	23
HLA-A*02:01	HLA-B*44:02	HLA-C*08:02	440	453	444	26	26	24
HLA-A*02:01	HLA-B*44:02	HLA-C*12:02	455	468	459	28	28	26
HLA-A*02:01	HLA-B*44:02	HLA-C*12:03	524	536	530	39	39	39
HLA-A*02:01	HLA-B*44:02	HLA-C*14:02	617	628	624	41	41	41
HLA-A*02:01	HLA-B*44:02	HLA-C*15:02	451	464	456	28	28	27
HLA-A*02:01	HLA-B*44:02	HLA-C*16:01	572	585	577	46	46	45
HLA-A*02:01	HLA-B*44:02	HLA-C*17:01	438	451	442	26	26	24
HLA-A*02:01	HLA-B*44:03	HLA-C*01:02	433	446	436	25	25	22
HLA-A*02:01	HLA-B*44:03	HLA-C*02:02	438	451	442	24	24	22
HLA-A*02:01	HLA-B*44:03	HLA-C*02:10	438	451	442	24	24	22
HLA-A*02:01	HLA-B*44:03	HLA-C*03:02	619	632	623	51	51	49
HLA-A*02:01	HLA-B*44:03	HLA-C*03:03	526	539	530	36	36	34
HLA-A*02:01	HLA-B*44:03	HLA-C*03:04	526	539	530	36	36	34
HLA-A*02:01	HLA-B*44:03	HLA-C*04:01	428	441	432	23	23	21
HLA-A*02:01	HLA-B*44:03	HLA-C*05:01	450	463	454	24	24	22
HLA-A*02:01	HLA-B*44:03	HLA-C*06:02	434	447	438	24	24	22
HLA-A*02:01	HLA-B*44:03	HLA-C*07:01	430	443	434	23	23	21
HLA-A*02:01	HLA-B*44:03	HLA-C*07:02	439	452	443	23	23	21
HLA-A*02:01	HLA-B*44:03	HLA-C*08:01	430	443	434	23	23	21
HLA-A*02:01	HLA-B*44:03	HLA-C*08:02	442	455	446	24	24	22
HLA-A*02:01	HLA-B*44:03	HLA-C*12:02	457	470	461	26	26	24
HLA-A*02:01	HLA-B*44:03	HLA-C*12:03	526	538	532	37	37	37
HLA-A*02:01	HLA-B*44:03	HLA-C*14:02	619	630	626	39	39	39
HLA-A*02:01	HLA-B*44:03	HLA-C*15:02	453	466	458	26	26	25
HLA-A*02:01	HLA-B*44:03	HLA-C*16:01	574	587	579	44	44	43
HLA-A*02:01	HLA-B*44:03	HLA-C*17:01	440	453	444	24	24	22
HLA-A*02:01	HLA-B*45:01	HLA-C*01:02	426	438	429	26	26	24
HLA-A*02:01	HLA-B*45:01	HLA-C*02:02	431	443	435	25	25	24
HLA-A*02:01	HLA-B*45:01	HLA-C*02:10	431	443	435	25	25	24
HLA-A*02:01	HLA-B*45:01	HLA-C*03:02	612	624	616	52	52	51
HLA-A*02:01	HLA-B*45:01	HLA-C*03:03	519	531	523	37	37	36
HLA-A*02:01	HLA-B*45:01	HLA-C*03:04	519	531	523	37	37	36
HLA-A*02:01	HLA-B*45:01	HLA-C*04:01	421	433	425	24	24	23
HLA-A*02:01	HLA-B*45:01	HLA-C*05:01	443	455	447	25	25	24
HLA-A*02:01	HLA-B*45:01	HLA-C*06:02	427	439	431	25	25	24
HLA-A*02:01	HLA-B*45:01	HLA-C*07:01	423	435	427	24	24	23
HLA-A*02:01	HLA-B*45:01	HLA-C*07:02	432	444	436	24	24	23
HLA-A*02:01	HLA-B*45:01	HLA-C*08:01	423	435	427	24	24	23
HLA-A*02:01	HLA-B*45:01	HLA-C*08:02	435	447	439	25	25	24
HLA-A*02:01	HLA-B*45:01	HLA-C*12:02	450	462	454	27	27	26
HLA-A*02:01	HLA-B*45:01	HLA-C*12:03	519	530	525	38	38	39
HLA-A*02:01	HLA-B*45:01	HLA-C*14:02	612	622	619	40	40	41
HLA-A*02:01	HLA-B*45:01	HLA-C*15:02	446	458	451	27	27	27
HLA-A*02:01	HLA-B*45:01	HLA-C*16:01	567	579	572	45	45	45
HLA-A*02:01	HLA-B*45:01	HLA-C*17:01	433	445	437	25	25	24
HLA-A*02:01	HLA-B*50:01	HLA-C*01:02	416	428	419	23	23	21
HLA-A*02:01	HLA-B*50:01	HLA-C*02:02	421	433	425	22	22	21
HLA-A*02:01	HLA-B*50:01	HLA-C*02:10	421	433	425	22	22	21
HLA-A*02:01	HLA-B*50:01	HLA-C*03:02	602	614	606	49	49	48
HLA-A*02:01	HLA-B*50:01	HLA-C*03:03	509	521	513	34	34	33
HLA-A*02:01	HLA-B*50:01	HLA-C*03:04	509	521	513	34	34	33
HLA-A*02:01	HLA-B*50:01	HLA-C*04:01	411	423	415	21	21	20
HLA-A*02:01	HLA-B*50:01	HLA-C*05:01	433	445	437	22	22	21
HLA-A*02:01	HLA-B*50:01	HLA-C*06:02	417	429	421	22	22	21
HLA-A*02:01	HLA-B*50:01	HLA-C*07:01	413	425	417	21	21	20
HLA-A*02:01	HLA-B*50:01	HLA-C*07:02	422	434	426	21	21	20
HLA-A*02:01	HLA-B*50:01	HLA-C*08:01	413	425	417	21	21	20
HLA-A*02:01	HLA-B*50:01	HLA-C*08:02	425	437	429	22	22	21
HLA-A*02:01	HLA-B*50:01	HLA-C*12:02	440	452	444	24	24	23
HLA-A*02:01	HLA-B*50:01	HLA-C*12:03	509	520	515	35	35	36
HLA-A*02:01	HLA-B*50:01	HLA-C*14:02	602	612	609	37	37	38
HLA-A*02:01	HLA-B*50:01	HLA-C*15:02	436	448	441	24	24	24
HLA-A*02:01	HLA-B*50:01	HLA-C*16:01	557	569	562	42	42	42
HLA-A*02:01	HLA-B*50:01	HLA-C*17:01	423	435	427	22	22	21
HLA-A*02:01	HLA-B*51:01	HLA-C*01:02	408	420	411	22	22	20
HLA-A*02:01	HLA-B*51:01	HLA-C*02:02	413	425	417	21	21	20
HLA-A*02:01	HLA-B*51:01	HLA-C*02:10	413	425	417	21	21	20
HLA-A*02:01	HLA-B*51:01	HLA-C*03:02	594	606	598	48	48	47
HLA-A*02:01	HLA-B*51:01	HLA-C*03:03	501	513	505	33	33	32
HLA-A*02:01	HLA-B*51:01	HLA-C*03:04	501	513	505	33	33	32
HLA-A*02:01	HLA-B*51:01	HLA-C*04:01	403	415	407	20	20	19
HLA-A*02:01	HLA-B*51:01	HLA-C*05:01	425	437	429	21	21	20
HLA-A*02:01	HLA-B*51:01	HLA-C*06:02	409	421	413	21	21	20
HLA-A*02:01	HLA-B*51:01	HLA-C*07:01	405	417	409	20	20	19
HLA-A*02:01	HLA-B*51:01	HLA-C*07:02	414	426	418	20	20	19
HLA-A*02:01	HLA-B*51:01	HLA-C*08:01	405	417	409	20	20	19
HLA-A*02:01	HLA-B*51:01	HLA-C*08:02	417	429	421	21	21	20
HLA-A*02:01	HLA-B*51:01	HLA-C*12:02	432	444	436	23	23	22
HLA-A*02:01	HLA-B*51:01	HLA-C*12:03	501	512	507	34	34	35
HLA-A*02:01	HLA-B*51:01	HLA-C*14:02	594	604	601	36	36	37
HLA-A*02:01	HLA-B*51:01	HLA-C*15:02	428	440	433	23	23	23
HLA-A*02:01	HLA-B*51:01	HLA-C*16:01	549	561	554	41	41	41
HLA-A*02:01	HLA-B*51:01	HLA-C*17:01	415	427	419	21	21	20
HLA-A*02:01	HLA-B*52:01	HLA-C*01:02	406	418	409	22	22	20
HLA-A*02:01	HLA-B*52:01	HLA-C*02:02	411	423	415	21	21	20
HLA-A*02:01	HLA-B*52:01	HLA-C*02:10	411	423	415	21	21	20
HLA-A*02:01	HLA-B*52:01	HLA-C*03:02	592	604	596	48	48	47
HLA-A*02:01	HLA-B*52:01	HLA-C*03:03	499	511	503	33	33	32
HLA-A*02:01	HLA-B*52:01	HLA-C*03:04	499	511	503	33	33	32
HLA-A*02:01	HLA-B*52:01	HLA-C*04:01	401	413	405	20	20	19
HLA-A*02:01	HLA-B*52:01	HLA-C*05:01	423	435	427	21	21	20
HLA-A*02:01	HLA-B*52:01	HLA-C*06:02	407	419	411	21	21	20
HLA-A*02:01	HLA-B*52:01	HLA-C*07:01	403	415	407	20	20	19
HLA-A*02:01	HLA-B*52:01	HLA-C*07:02	412	424	416	20	20	19
HLA-A*02:01	HLA-B*52:01	HLA-C*08:01	403	415	407	20	20	19
HLA-A*02:01	HLA-B*52:01	HLA-C*08:02	415	427	419	21	21	20
HLA-A*02:01	HLA-B*52:01	HLA-C*12:02	430	442	434	23	23	22
HLA-A*02:01	HLA-B*52:01	HLA-C*12:03	499	510	505	34	34	35
HLA-A*02:01	HLA-B*52:01	HLA-C*14:02	592	602	599	36	36	37
HLA-A*02:01	HLA-B*52:01	HLA-C*15:02	426	438	431	23	23	23
HLA-A*02:01	HLA-B*52:01	HLA-C*16:01	547	559	552	41	41	41
HLA-A*02:01	HLA-B*52:01	HLA-C*17:01	413	425	417	21	21	20
HLA-A*02:01	HLA-B*53:01	HLA-C*01:02	447	459	450	33	33	31
HLA-A*02:01	HLA-B*53:01	HLA-C*02:02	452	464	456	32	32	31
HLA-A*02:01	HLA-B*53:01	HLA-C*02:10	452	464	456	32	32	31
HLA-A*02:01	HLA-B*53:01	HLA-C*03:02	631	643	635	58	58	57
HLA-A*02:01	HLA-B*53:01	HLA-C*03:03	539	551	543	43	43	42
HLA-A*02:01	HLA-B*53:01	HLA-C*03:04	539	551	543	43	43	42
HLA-A*02:01	HLA-B*53:01	HLA-C*04:01	442	454	446	31	31	30
HLA-A*02:01	HLA-B*53:01	HLA-C*05:01	464	476	468	32	32	31
HLA-A*02:01	HLA-B*53:01	HLA-C*06:02	448	460	452	32	32	31
HLA-A*02:01	HLA-B*53:01	HLA-C*07:01	444	456	448	31	31	30
HLA-A*02:01	HLA-B*53:01	HLA-C*07:02	453	465	457	31	31	30
HLA-A*02:01	HLA-B*53:01	HLA-C*08:01	444	456	448	31	31	30
HLA-A*02:01	HLA-B*53:01	HLA-C*08:02	456	468	460	32	32	31
HLA-A*02:01	HLA-B*53:01	HLA-C*12:02	470	482	474	33	33	32
HLA-A*02:01	HLA-B*53:01	HLA-C*12:03	539	550	545	44	44	45
HLA-A*02:01	HLA-B*53:01	HLA-C*14:02	633	643	640	47	47	48
HLA-A*02:01	HLA-B*53:01	HLA-C*15:02	467	479	472	34	34	34
HLA-A*02:01	HLA-B*53:01	HLA-C*16:01	587	599	592	51	51	51
HLA-A*02:01	HLA-B*53:01	HLA-C*17:01	454	466	458	32	32	31
HLA-A*02:01	HLA-B*57:01	HLA-C*01:02	468	480	472	28	28	27
HLA-A*02:01	HLA-B*57:01	HLA-C*02:02	473	485	478	27	27	27
HLA-A*02:01	HLA-B*57:01	HLA-C*02:10	473	485	478	27	27	27
HLA-A*02:01	HLA-B*57:01	HLA-C*03:02	650	662	654	54	54	53
HLA-A*02:01	HLA-B*57:01	HLA-C*03:03	560	572	565	39	39	39
HLA-A*02:01	HLA-B*57:01	HLA-C*03:04	560	572	565	39	39	39
HLA-A*02:01	HLA-B*57:01	HLA-C*04:01	463	475	468	26	26	26
HLA-A*02:01	HLA-B*57:01	HLA-C*05:01	485	497	490	27	27	27
HLA-A*02:01	HLA-B*57:01	HLA-C*06:02	469	481	474	27	27	27
HLA-A*02:01	HLA-B*57:01	HLA-C*07:01	465	477	470	26	26	26
HLA-A*02:01	HLA-B*57:01	HLA-C*07:02	474	486	479	26	26	26
HLA-A*02:01	HLA-B*57:01	HLA-C*08:01	465	477	470	26	26	26
HLA-A*02:01	HLA-B*57:01	HLA-C*08:02	477	489	482	27	27	27
HLA-A*02:01	HLA-B*57:01	HLA-C*12:02	491	503	496	29	29	29
HLA-A*02:01	HLA-B*57:01	HLA-C*12:03	560	571	566	40	40	41
HLA-A*02:01	HLA-B*57:01	HLA-C*14:02	654	664	662	42	42	44
HLA-A*02:01	HLA-B*57:01	HLA-C*15:02	488	500	494	29	29	30
HLA-A*02:01	HLA-B*57:01	HLA-C*16:01	607	619	612	47	47	47
HLA-A*02:01	HLA-B*57:01	HLA-C*17:01	475	487	480	27	27	27
HLA-A*02:01	HLA-B*58:01	HLA-C*01:02	556	568	562	36	36	36
HLA-A*02:01	HLA-B*58:01	HLA-C*02:02	559	571	566	35	35	36
HLA-A*02:01	HLA-B*58:01	HLA-C*02:10	559	571	566	35	35	36
HLA-A*02:01	HLA-B*58:01	HLA-C*03:02	729	741	735	59	59	59
HLA-A*02:01	HLA-B*58:01	HLA-C*03:03	642	654	649	44	44	45
HLA-A*02:01	HLA-B*58:01	HLA-C*03:04	642	654	649	44	44	45
HLA-A*02:01	HLA-B*58:01	HLA-C*04:01	551	563	558	34	34	35
HLA-A*02:01	HLA-B*58:01	HLA-C*05:01	573	585	580	35	35	36
HLA-A*02:01	HLA-B*58:01	HLA-C*06:02	557	569	564	35	35	36
HLA-A*02:01	HLA-B*58:01	HLA-C*07:01	553	565	560	34	34	35
HLA-A*02:01	HLA-B*58:01	HLA-C*07:02	562	574	569	34	34	35
HLA-A*02:01	HLA-B*58:01	HLA-C*08:01	553	565	560	34	34	35
HLA-A*02:01	HLA-B*58:01	HLA-C*08:02	565	577	572	35	35	36
HLA-A*02:01	HLA-B*58:01	HLA-C*12:02	575	587	582	35	35	36
HLA-A*02:01	HLA-B*58:01	HLA-C*12:03	641	652	649	45	45	47
HLA-A*02:01	HLA-B*58:01	HLA-C*14:02	741	751	751	50	50	53
HLA-A*02:01	HLA-B*58:01	HLA-C*15:02	573	585	581	37	37	39
HLA-A*02:01	HLA-B*58:01	HLA-C*16:01	686	698	693	52	52	53
HLA-A*02:01	HLA-B*58:01	HLA-C*17:01	561	573	568	35	35	36
HLA-A*02:01	HLA-B*58:02	HLA-C*01:02	406	418	409	22	22	20
HLA-A*02:01	HLA-B*58:02	HLA-C*02:02	411	423	415	21	21	20
HLA-A*02:01	HLA-B*58:02	HLA-C*02:10	411	423	415	21	21	20
HLA-A*02:01	HLA-B*58:02	HLA-C*03:02	592	604	596	48	48	47
HLA-A*02:01	HLA-B*58:02	HLA-C*03:03	499	511	503	33	33	32
HLA-A*02:01	HLA-B*58:02	HLA-C*03:04	499	511	503	33	33	32
HLA-A*02:01	HLA-B*58:02	HLA-C*04:01	401	413	405	20	20	19
HLA-A*02:01	HLA-B*58:02	HLA-C*05:01	423	435	427	21	21	20
HLA-A*02:01	HLA-B*58:02	HLA-C*06:02	407	419	411	21	21	20
HLA-A*02:01	HLA-B*58:02	HLA-C*07:01	403	415	407	20	20	19
HLA-A*02:01	HLA-B*58:02	HLA-C*07:02	412	424	416	20	20	19
HLA-A*02:01	HLA-B*58:02	HLA-C*08:01	403	415	407	20	20	19
HLA-A*02:01	HLA-B*58:02	HLA-C*08:02	415	427	419	21	21	20
HLA-A*02:01	HLA-B*58:02	HLA-C*12:02	430	442	434	23	23	22
HLA-A*02:01	HLA-B*58:02	HLA-C*12:03	499	510	505	34	34	35
HLA-A*02:01	HLA-B*58:02	HLA-C*14:02	592	602	599	36	36	37
HLA-A*02:01	HLA-B*58:02	HLA-C*15:02	426	438	431	23	23	23
HLA-A*02:01	HLA-B*58:02	HLA-C*16:01	547	559	552	41	41	41
HLA-A*02:01	HLA-B*58:02	HLA-C*17:01	413	425	417	21	21	20
HLA-A*02:02	HLA-B*07:02	HLA-C*01:02	732	743	737	55	51	51
HLA-A*02:02	HLA-B*07:02	HLA-C*02:02	735	746	741	53	49	50
HLA-A*02:02	HLA-B*07:02	HLA-C*02:10	735	746	741	53	49	50
HLA-A*02:02	HLA-B*07:02	HLA-C*03:02	908	919	914	79	75	76
HLA-A*02:02	HLA-B*07:02	HLA-C*03:03	811	822	817	64	60	61
HLA-A*02:02	HLA-B*07:02	HLA-C*03:04	811	822	817	64	60	61
HLA-A*02:02	HLA-B*07:02	HLA-C*04:01	727	738	733	53	49	50
HLA-A*02:02	HLA-B*07:02	HLA-C*05:01	749	760	755	54	50	51
HLA-A*02:02	HLA-B*07:02	HLA-C*06:02	733	744	739	54	50	51
HLA-A*02:02	HLA-B*07:02	HLA-C*07:01	729	740	735	53	49	50
HLA-A*02:02	HLA-B*07:02	HLA-C*07:02	738	749	744	53	49	50
HLA-A*02:02	HLA-B*07:02	HLA-C*08:01	729	740	735	53	49	50
HLA-A*02:02	HLA-B*07:02	HLA-C*08:02	741	752	747	54	50	51
HLA-A*02:02	HLA-B*07:02	HLA-C*12:02	754	765	760	55	51	52
HLA-A*02:02	HLA-B*07:02	HLA-C*12:03	818	828	826	66	62	65
HLA-A*02:02	HLA-B*07:02	HLA-C*14:02	915	924	924	68	64	67
HLA-A*02:02	HLA-B*07:02	HLA-C*15:02	747	758	754	55	51	53
HLA-A*02:02	HLA-B*07:02	HLA-C*16:01	866	877	873	73	69	71
HLA-A*02:02	HLA-B*07:02	HLA-C*17:01	735	746	741	53	49	50
HLA-A*02:02	HLA-B*08:01	HLA-C*01:02	709	724	717	50	51	50
HLA-A*02:02	HLA-B*08:01	HLA-C*02:02	712	727	721	48	49	49
HLA-A*02:02	HLA-B*08:01	HLA-C*02:10	712	727	721	48	49	49
HLA-A*02:02	HLA-B*08:01	HLA-C*03:02	880	895	889	74	75	75
HLA-A*02:02	HLA-B*08:01	HLA-C*03:03	784	799	793	59	60	60
HLA-A*02:02	HLA-B*08:01	HLA-C*03:04	784	799	793	59	60	60
HLA-A*02:02	HLA-B*08:01	HLA-C*04:01	704	719	713	48	49	49
HLA-A*02:02	HLA-B*08:01	HLA-C*05:01	726	741	735	49	50	50
HLA-A*02:02	HLA-B*08:01	HLA-C*06:02	710	725	719	49	50	50
HLA-A*02:02	HLA-B*08:01	HLA-C*07:01	706	721	715	48	49	49
HLA-A*02:02	HLA-B*08:01	HLA-C*07:02	715	730	724	48	49	49
HLA-A*02:02	HLA-B*08:01	HLA-C*08:01	706	721	715	48	49	49
HLA-A*02:02	HLA-B*08:01	HLA-C*08:02	718	733	727	49	50	50
HLA-A*02:02	HLA-B*08:01	HLA-C*12:02	729	744	738	50	51	51
HLA-A*02:02	HLA-B*08:01	HLA-C*12:03	790	804	801	61	62	64
HLA-A*02:02	HLA-B*08:01	HLA-C*14:02	890	903	902	63	64	66
HLA-A*02:02	HLA-B*08:01	HLA-C*15:02	723	738	733	50	51	52
HLA-A*02:02	HLA-B*08:01	HLA-C*16:01	838	853	848	68	69	70
HLA-A*02:02	HLA-B*08:01	HLA-C*17:01	712	727	721	48	49	49
HLA-A*02:02	HLA-B*14:02	HLA-C*01:02	678	691	686	49	49	49
HLA-A*02:02	HLA-B*14:02	HLA-C*02:02	681	694	690	47	47	48
HLA-A*02:02	HLA-B*14:02	HLA-C*02:10	681	694	690	47	47	48
HLA-A*02:02	HLA-B*14:02	HLA-C*03:02	855	868	864	73	73	74
HLA-A*02:02	HLA-B*14:02	HLA-C*03:03	758	771	767	58	58	59
HLA-A*02:02	HLA-B*14:02	HLA-C*03:04	758	771	767	58	58	59
HLA-A*02:02	HLA-B*14:02	HLA-C*04:01	673	686	682	47	47	48
HLA-A*02:02	HLA-B*14:02	HLA-C*05:01	695	708	704	48	48	49
HLA-A*02:02	HLA-B*14:02	HLA-C*06:02	679	692	688	48	48	49
HLA-A*02:02	HLA-B*14:02	HLA-C*07:01	675	688	684	47	47	48
HLA-A*02:02	HLA-B*14:02	HLA-C*07:02	684	697	693	47	47	48
HLA-A*02:02	HLA-B*14:02	HLA-C*08:01	675	688	684	47	47	48
HLA-A*02:02	HLA-B*14:02	HLA-C*08:02	687	700	696	48	48	49
HLA-A*02:02	HLA-B*14:02	HLA-C*12:02	700	713	709	49	49	50
HLA-A*02:02	HLA-B*14:02	HLA-C*12:03	765	777	776	60	60	63
HLA-A*02:02	HLA-B*14:02	HLA-C*14:02	861	872	873	62	62	65
HLA-A*02:02	HLA-B*14:02	HLA-C*15:02	693	706	703	49	49	51
HLA-A*02:02	HLA-B*14:02	HLA-C*16:01	813	826	823	67	67	69
HLA-A*02:02	HLA-B*14:02	HLA-C*17:01	681	694	690	47	47	48
HLA-A*02:02	HLA-B*15:01	HLA-C*01:02	844	858	852	64	64	62
HLA-A*02:02	HLA-B*15:01	HLA-C*02:02	845	859	854	62	62	61
HLA-A*02:02	HLA-B*15:01	HLA-C*02:10	845	859	854	62	62	61
HLA-A*02:02	HLA-B*15:01	HLA-C*03:02	982	996	991	84	84	83
HLA-A*02:02	HLA-B*15:01	HLA-C*03:03	919	933	928	73	73	72
HLA-A*02:02	HLA-B*15:01	HLA-C*03:04	919	933	928	73	73	72
HLA-A*02:02	HLA-B*15:01	HLA-C*04:01	839	853	848	62	62	61
HLA-A*02:02	HLA-B*15:01	HLA-C*05:01	861	875	870	63	63	62
HLA-A*02:02	HLA-B*15:01	HLA-C*06:02	845	859	854	63	63	62
HLA-A*02:02	HLA-B*15:01	HLA-C*07:01	841	855	850	62	62	61
HLA-A*02:02	HLA-B*15:01	HLA-C*07:02	850	864	859	62	62	61
HLA-A*02:02	HLA-B*15:01	HLA-C*08:01	841	855	850	62	62	61
HLA-A*02:02	HLA-B*15:01	HLA-C*08:02	853	867	862	63	63	62
HLA-A*02:02	HLA-B*15:01	HLA-C*12:02	863	877	872	64	64	63
HLA-A*02:02	HLA-B*15:01	HLA-C*12:03	926	939	937	75	75	76
HLA-A*02:02	HLA-B*15:01	HLA-C*14:02	1022	1034	1034	77	77	78
HLA-A*02:02	HLA-B*15:01	HLA-C*15:02	859	873	869	64	64	64
HLA-A*02:02	HLA-B*15:01	HLA-C*16:01	967	981	977	80	80	80
HLA-A*02:02	HLA-B*15:01	HLA-C*17:01	847	861	856	62	62	61
HLA-A*02:02	HLA-B*15:03	HLA-C*01:02	1131	1145	1143	107	107	111
HLA-A*02:02	HLA-B*15:03	HLA-C*02:02	1128	1142	1141	105	105	110
HLA-A*02:02	HLA-B*15:03	HLA-C*02:10	1128	1142	1141	105	105	110
HLA-A*02:02	HLA-B*15:03	HLA-C*03:02	1212	1226	1225	115	115	120
HLA-A*02:02	HLA-B*15:03	HLA-C*03:03	1194	1208	1207	113	113	118
HLA-A*02:02	HLA-B*15:03	HLA-C*03:04	1194	1208	1207	113	113	118
HLA-A*02:02	HLA-B*15:03	HLA-C*04:01	1126	1140	1139	105	105	110
HLA-A*02:02	HLA-B*15:03	HLA-C*05:01	1148	1162	1161	106	106	111
HLA-A*02:02	HLA-B*15:03	HLA-C*06:02	1132	1146	1145	106	106	111
HLA-A*02:02	HLA-B*15:03	HLA-C*07:01	1128	1142	1141	105	105	110
HLA-A*02:02	HLA-B*15:03	HLA-C*07:02	1136	1150	1149	105	105	110
HLA-A*02:02	HLA-B*15:03	HLA-C*08:01	1128	1142	1141	105	105	110
HLA-A*02:02	HLA-B*15:03	HLA-C*08:02	1140	1154	1153	106	106	111
HLA-A*02:02	HLA-B*15:03	HLA-C*12:02	1136	1150	1149	105	105	110
HLA-A*02:02	HLA-B*15:03	HLA-C*12:03	1189	1202	1203	111	111	117
HLA-A*02:02	HLA-B*15:03	HLA-C*14:02	1300	1312	1316	120	120	127
HLA-A*02:02	HLA-B*15:03	HLA-C*15:02	1144	1158	1158	107	107	113
HLA-A*02:02	HLA-B*15:03	HLA-C*16:01	1215	1229	1228	115	115	120
HLA-A*02:02	HLA-B*15:03	HLA-C*17:01	1133	1147	1146	105	105	110
HLA-A*02:02	HLA-B*18:01	HLA-C*01:02	709	722	719	53	53	54
HLA-A*02:02	HLA-B*18:01	HLA-C*02:02	712	725	723	51	51	53
HLA-A*02:02	HLA-B*18:01	HLA-C*02:10	712	725	723	51	51	53
HLA-A*02:02	HLA-B*18:01	HLA-C*03:02	886	899	897	77	77	79
HLA-A*02:02	HLA-B*18:01	HLA-C*03:03	789	802	800	62	62	64
HLA-A*02:02	HLA-B*18:01	HLA-C*03:04	789	802	800	62	62	64
HLA-A*02:02	HLA-B*18:01	HLA-C*04:01	704	717	715	51	51	53
HLA-A*02:02	HLA-B*18:01	HLA-C*05:01	726	739	737	52	52	54
HLA-A*02:02	HLA-B*18:01	HLA-C*06:02	710	723	721	52	52	54
HLA-A*02:02	HLA-B*18:01	HLA-C*07:01	706	719	717	51	51	53
HLA-A*02:02	HLA-B*18:01	HLA-C*07:02	715	728	726	51	51	53
HLA-A*02:02	HLA-B*18:01	HLA-C*08:01	706	719	717	51	51	53
HLA-A*02:02	HLA-B*18:01	HLA-C*08:02	718	731	729	52	52	54
HLA-A*02:02	HLA-B*18:01	HLA-C*12:02	731	744	742	53	53	55
HLA-A*02:02	HLA-B*18:01	HLA-C*12:03	796	808	809	64	64	68
HLA-A*02:02	HLA-B*18:01	HLA-C*14:02	892	903	906	66	66	70
HLA-A*02:02	HLA-B*18:01	HLA-C*15:02	724	737	736	53	53	56
HLA-A*02:02	HLA-B*18:01	HLA-C*16:01	844	857	856	71	71	74
HLA-A*02:02	HLA-B*18:01	HLA-C*17:01	712	725	723	51	51	53
HLA-A*02:02	HLA-B*27:05	HLA-C*01:02	719	735	727	54	57	54
HLA-A*02:02	HLA-B*27:05	HLA-C*02:02	722	738	731	52	55	53
HLA-A*02:02	HLA-B*27:05	HLA-C*02:10	722	738	731	52	55	53
HLA-A*02:02	HLA-B*27:05	HLA-C*03:02	896	912	905	78	81	79
HLA-A*02:02	HLA-B*27:05	HLA-C*03:03	799	815	808	63	66	64
HLA-A*02:02	HLA-B*27:05	HLA-C*03:04	799	815	808	63	66	64
HLA-A*02:02	HLA-B*27:05	HLA-C*04:01	714	730	723	52	55	53
HLA-A*02:02	HLA-B*27:05	HLA-C*05:01	736	752	745	53	56	54
HLA-A*02:02	HLA-B*27:05	HLA-C*06:02	719	735	728	53	56	54
HLA-A*02:02	HLA-B*27:05	HLA-C*07:01	715	731	724	52	55	53
HLA-A*02:02	HLA-B*27:05	HLA-C*07:02	724	740	733	52	55	53
HLA-A*02:02	HLA-B*27:05	HLA-C*08:01	716	732	725	52	55	53
HLA-A*02:02	HLA-B*27:05	HLA-C*08:02	728	744	737	53	56	54
HLA-A*02:02	HLA-B*27:05	HLA-C*12:02	741	757	750	54	57	55
HLA-A*02:02	HLA-B*27:05	HLA-C*12:03	806	821	817	65	68	68
HLA-A*02:02	HLA-B*27:05	HLA-C*14:02	901	915	913	67	70	70
HLA-A*02:02	HLA-B*27:05	HLA-C*15:02	734	750	744	54	57	56
HLA-A*02:02	HLA-B*27:05	HLA-C*16:01	854	870	864	72	75	74
HLA-A*02:02	HLA-B*27:05	HLA-C*17:01	722	738	731	52	55	53
HLA-A*02:02	HLA-B*35:01	HLA-C*01:02	784	799	794	69	69	70
HLA-A*02:02	HLA-B*35:01	HLA-C*02:02	780	795	791	67	67	69
HLA-A*02:02	HLA-B*35:01	HLA-C*02:10	780	795	791	67	67	69
HLA-A*02:02	HLA-B*35:01	HLA-C*03:02	915	930	926	85	85	87
HLA-A*02:02	HLA-B*35:01	HLA-C*03:03	853	868	864	76	76	78
HLA-A*02:02	HLA-B*35:01	HLA-C*03:04	853	868	864	76	76	78
HLA-A*02:02	HLA-B*35:01	HLA-C*04:01	779	794	790	67	67	69
HLA-A*02:02	HLA-B*35:01	HLA-C*05:01	800	815	811	68	68	70
HLA-A*02:02	HLA-B*35:01	HLA-C*06:02	785	800	796	68	68	70
HLA-A*02:02	HLA-B*35:01	HLA-C*07:01	781	796	792	67	67	69
HLA-A*02:02	HLA-B*35:01	HLA-C*07:02	790	805	801	67	67	69
HLA-A*02:02	HLA-B*35:01	HLA-C*08:01	780	795	791	67	67	69
HLA-A*02:02	HLA-B*35:01	HLA-C*08:02	792	807	803	68	68	70
HLA-A*02:02	HLA-B*35:01	HLA-C*12:02	792	807	803	67	67	69
HLA-A*02:02	HLA-B*35:01	HLA-C*12:03	853	867	866	75	75	79
HLA-A*02:02	HLA-B*35:01	HLA-C*14:02	963	976	977	82	82	86
HLA-A*02:02	HLA-B*35:01	HLA-C*15:02	799	814	811	69	69	72
HLA-A*02:02	HLA-B*35:01	HLA-C*16:01	893	908	905	82	82	85
HLA-A*02:02	HLA-B*35:01	HLA-C*17:01	786	801	797	67	67	69
HLA-A*02:02	HLA-B*35:03	HLA-C*01:02	679	693	688	49	49	49
HLA-A*02:02	HLA-B*35:03	HLA-C*02:02	682	696	692	47	47	48
HLA-A*02:02	HLA-B*35:03	HLA-C*02:10	682	696	692	47	47	48
HLA-A*02:02	HLA-B*35:03	HLA-C*03:02	856	870	866	73	73	74
HLA-A*02:02	HLA-B*35:03	HLA-C*03:03	759	773	769	58	58	59
HLA-A*02:02	HLA-B*35:03	HLA-C*03:04	759	773	769	58	58	59
HLA-A*02:02	HLA-B*35:03	HLA-C*04:01	674	688	684	47	47	48
HLA-A*02:02	HLA-B*35:03	HLA-C*05:01	696	710	706	48	48	49
HLA-A*02:02	HLA-B*35:03	HLA-C*06:02	680	694	690	48	48	49
HLA-A*02:02	HLA-B*35:03	HLA-C*07:01	676	690	686	47	47	48
HLA-A*02:02	HLA-B*35:03	HLA-C*07:02	685	699	695	47	47	48
HLA-A*02:02	HLA-B*35:03	HLA-C*08:01	676	690	686	47	47	48
HLA-A*02:02	HLA-B*35:03	HLA-C*08:02	688	702	698	48	48	49
HLA-A*02:02	HLA-B*35:03	HLA-C*12:02	701	715	711	49	49	50
HLA-A*02:02	HLA-B*35:03	HLA-C*12:03	766	779	778	60	60	63
HLA-A*02:02	HLA-B*35:03	HLA-C*14:02	862	874	875	62	62	65
HLA-A*02:02	HLA-B*35:03	HLA-C*15:02	694	708	705	49	49	51
HLA-A*02:02	HLA-B*35:03	HLA-C*16:01	814	828	825	67	67	69
HLA-A*02:02	HLA-B*35:03	HLA-C*17:01	682	696	692	47	47	48
HLA-A*02:02	HLA-B*38:01	HLA-C*01:02	679	692	687	49	49	49
HLA-A*02:02	HLA-B*38:01	HLA-C*02:02	682	695	691	47	47	48
HLA-A*02:02	HLA-B*38:01	HLA-C*02:10	682	695	691	47	47	48
HLA-A*02:02	HLA-B*38:01	HLA-C*03:02	856	869	865	73	73	74
HLA-A*02:02	HLA-B*38:01	HLA-C*03:03	759	772	768	58	58	59
HLA-A*02:02	HLA-B*38:01	HLA-C*03:04	759	772	768	58	58	59
HLA-A*02:02	HLA-B*38:01	HLA-C*04:01	674	687	683	47	47	48
HLA-A*02:02	HLA-B*38:01	HLA-C*05:01	696	709	705	48	48	49
HLA-A*02:02	HLA-B*38:01	HLA-C*06:02	680	693	689	48	48	49
HLA-A*02:02	HLA-B*38:01	HLA-C*07:01	676	689	685	47	47	48
HLA-A*02:02	HLA-B*38:01	HLA-C*07:02	685	698	694	47	47	48
HLA-A*02:02	HLA-B*38:01	HLA-C*08:01	676	689	685	47	47	48
HLA-A*02:02	HLA-B*38:01	HLA-C*08:02	688	701	697	48	48	49
HLA-A*02:02	HLA-B*38:01	HLA-C*12:02	701	714	710	49	49	50
HLA-A*02:02	HLA-B*38:01	HLA-C*12:03	766	778	777	60	60	63
HLA-A*02:02	HLA-B*38:01	HLA-C*14:02	862	873	874	62	62	65
HLA-A*02:02	HLA-B*38:01	HLA-C*15:02	694	707	704	49	49	51
HLA-A*02:02	HLA-B*38:01	HLA-C*16:01	814	827	824	67	67	69
HLA-A*02:02	HLA-B*38:01	HLA-C*17:01	682	695	691	47	47	48
HLA-A*02:02	HLA-B*40:01	HLA-C*01:02	740	754	747	51	51	51
HLA-A*02:02	HLA-B*40:01	HLA-C*02:02	743	757	751	49	49	50
HLA-A*02:02	HLA-B*40:01	HLA-C*02:10	743	757	751	49	49	50
HLA-A*02:02	HLA-B*40:01	HLA-C*03:02	917	931	925	75	75	76
HLA-A*02:02	HLA-B*40:01	HLA-C*03:03	820	834	828	60	60	61
HLA-A*02:02	HLA-B*40:01	HLA-C*03:04	820	834	828	60	60	61
HLA-A*02:02	HLA-B*40:01	HLA-C*04:01	735	749	743	49	49	50
HLA-A*02:02	HLA-B*40:01	HLA-C*05:01	757	771	765	50	50	51
HLA-A*02:02	HLA-B*40:01	HLA-C*06:02	741	755	749	50	50	51
HLA-A*02:02	HLA-B*40:01	HLA-C*07:01	737	751	745	49	49	50
HLA-A*02:02	HLA-B*40:01	HLA-C*07:02	746	760	754	49	49	50
HLA-A*02:02	HLA-B*40:01	HLA-C*08:01	737	751	745	49	49	50
HLA-A*02:02	HLA-B*40:01	HLA-C*08:02	749	763	757	50	50	51
HLA-A*02:02	HLA-B*40:01	HLA-C*12:02	762	776	770	51	51	52
HLA-A*02:02	HLA-B*40:01	HLA-C*12:03	827	840	837	62	62	65
HLA-A*02:02	HLA-B*40:01	HLA-C*14:02	923	935	934	64	64	67
HLA-A*02:02	HLA-B*40:01	HLA-C*15:02	755	769	764	51	51	53
HLA-A*02:02	HLA-B*40:01	HLA-C*16:01	875	889	884	69	69	71
HLA-A*02:02	HLA-B*40:01	HLA-C*17:01	743	757	751	49	49	50
HLA-A*02:02	HLA-B*40:02	HLA-C*01:02	747	761	754	56	56	55
HLA-A*02:02	HLA-B*40:02	HLA-C*02:02	750	764	758	54	54	54
HLA-A*02:02	HLA-B*40:02	HLA-C*02:10	750	764	758	54	54	54
HLA-A*02:02	HLA-B*40:02	HLA-C*03:02	924	938	932	80	80	80
HLA-A*02:02	HLA-B*40:02	HLA-C*03:03	827	841	835	65	65	65
HLA-A*02:02	HLA-B*40:02	HLA-C*03:04	827	841	835	65	65	65
HLA-A*02:02	HLA-B*40:02	HLA-C*04:01	742	756	750	54	54	54
HLA-A*02:02	HLA-B*40:02	HLA-C*05:01	764	778	772	55	55	55
HLA-A*02:02	HLA-B*40:02	HLA-C*06:02	748	762	756	55	55	55
HLA-A*02:02	HLA-B*40:02	HLA-C*07:01	744	758	752	54	54	54
HLA-A*02:02	HLA-B*40:02	HLA-C*07:02	753	767	761	54	54	54
HLA-A*02:02	HLA-B*40:02	HLA-C*08:01	744	758	752	54	54	54
HLA-A*02:02	HLA-B*40:02	HLA-C*08:02	756	770	764	55	55	55
HLA-A*02:02	HLA-B*40:02	HLA-C*12:02	769	783	777	56	56	56
HLA-A*02:02	HLA-B*40:02	HLA-C*12:03	834	847	844	67	67	69
HLA-A*02:02	HLA-B*40:02	HLA-C*14:02	930	942	941	69	69	71
HLA-A*02:02	HLA-B*40:02	HLA-C*15:02	762	776	771	56	56	57
HLA-A*02:02	HLA-B*40:02	HLA-C*16:01	882	896	891	74	74	75
HLA-A*02:02	HLA-B*40:02	HLA-C*17:01	750	764	758	54	54	54
HLA-A*02:02	HLA-B*40:06	HLA-C*01:02	686	699	694	50	50	50
HLA-A*02:02	HLA-B*40:06	HLA-C*02:02	689	702	698	48	48	49
HLA-A*02:02	HLA-B*40:06	HLA-C*02:10	689	702	698	48	48	49
HLA-A*02:02	HLA-B*40:06	HLA-C*03:02	863	876	872	74	74	75
HLA-A*02:02	HLA-B*40:06	HLA-C*03:03	766	779	775	59	59	60
HLA-A*02:02	HLA-B*40:06	HLA-C*03:04	766	779	775	59	59	60
HLA-A*02:02	HLA-B*40:06	HLA-C*04:01	681	694	690	48	48	49
HLA-A*02:02	HLA-B*40:06	HLA-C*05:01	703	716	712	49	49	50
HLA-A*02:02	HLA-B*40:06	HLA-C*06:02	687	700	696	49	49	50
HLA-A*02:02	HLA-B*40:06	HLA-C*07:01	683	696	692	48	48	49
HLA-A*02:02	HLA-B*40:06	HLA-C*07:02	692	705	701	48	48	49
HLA-A*02:02	HLA-B*40:06	HLA-C*08:01	683	696	692	48	48	49
HLA-A*02:02	HLA-B*40:06	HLA-C*08:02	695	708	704	49	49	50
HLA-A*02:02	HLA-B*40:06	HLA-C*12:02	708	721	717	50	50	51
HLA-A*02:02	HLA-B*40:06	HLA-C*12:03	773	785	784	61	61	64
HLA-A*02:02	HLA-B*40:06	HLA-C*14:02	869	880	881	63	63	66
HLA-A*02:02	HLA-B*40:06	HLA-C*15:02	701	714	711	50	50	52
HLA-A*02:02	HLA-B*40:06	HLA-C*16:01	821	834	831	68	68	70
HLA-A*02:02	HLA-B*40:06	HLA-C*17:01	689	702	698	48	48	49
HLA-A*02:02	HLA-B*42:01	HLA-C*01:02	780	792	788	61	58	58
HLA-A*02:02	HLA-B*42:01	HLA-C*02:02	783	795	792	59	56	57
HLA-A*02:02	HLA-B*42:01	HLA-C*02:10	783	795	792	59	56	57
HLA-A*02:02	HLA-B*42:01	HLA-C*03:02	956	968	965	85	82	83
HLA-A*02:02	HLA-B*42:01	HLA-C*03:03	859	871	868	70	67	68
HLA-A*02:02	HLA-B*42:01	HLA-C*03:04	859	871	868	70	67	68
HLA-A*02:02	HLA-B*42:01	HLA-C*04:01	775	787	784	59	56	57
HLA-A*02:02	HLA-B*42:01	HLA-C*05:01	797	809	806	60	57	58
HLA-A*02:02	HLA-B*42:01	HLA-C*06:02	781	793	790	60	57	58
HLA-A*02:02	HLA-B*42:01	HLA-C*07:01	777	789	786	59	56	57
HLA-A*02:02	HLA-B*42:01	HLA-C*07:02	786	798	795	59	56	57
HLA-A*02:02	HLA-B*42:01	HLA-C*08:01	777	789	786	59	56	57
HLA-A*02:02	HLA-B*42:01	HLA-C*08:02	789	801	798	60	57	58
HLA-A*02:02	HLA-B*42:01	HLA-C*12:02	802	814	811	61	58	59
HLA-A*02:02	HLA-B*42:01	HLA-C*12:03	866	877	877	72	69	72
HLA-A*02:02	HLA-B*42:01	HLA-C*14:02	963	973	975	74	71	74
HLA-A*02:02	HLA-B*42:01	HLA-C*15:02	795	807	805	61	58	60
HLA-A*02:02	HLA-B*42:01	HLA-C*16:01	914	926	924	79	76	78
HLA-A*02:02	HLA-B*42:01	HLA-C*17:01	783	795	792	59	56	57
HLA-A*02:02	HLA-B*44:02	HLA-C*01:02	702	716	710	54	54	53
HLA-A*02:02	HLA-B*44:02	HLA-C*02:02	705	719	714	52	52	52
HLA-A*02:02	HLA-B*44:02	HLA-C*02:10	705	719	714	52	52	52
HLA-A*02:02	HLA-B*44:02	HLA-C*03:02	879	893	888	78	78	78
HLA-A*02:02	HLA-B*44:02	HLA-C*03:03	782	796	791	63	63	63
HLA-A*02:02	HLA-B*44:02	HLA-C*03:04	782	796	791	63	63	63
HLA-A*02:02	HLA-B*44:02	HLA-C*04:01	697	711	706	52	52	52
HLA-A*02:02	HLA-B*44:02	HLA-C*05:01	719	733	728	53	53	53
HLA-A*02:02	HLA-B*44:02	HLA-C*06:02	703	717	712	53	53	53
HLA-A*02:02	HLA-B*44:02	HLA-C*07:01	699	713	708	52	52	52
HLA-A*02:02	HLA-B*44:02	HLA-C*07:02	708	722	717	52	52	52
HLA-A*02:02	HLA-B*44:02	HLA-C*08:01	699	713	708	52	52	52
HLA-A*02:02	HLA-B*44:02	HLA-C*08:02	711	725	720	53	53	53
HLA-A*02:02	HLA-B*44:02	HLA-C*12:02	724	738	733	54	54	54
HLA-A*02:02	HLA-B*44:02	HLA-C*12:03	789	802	800	65	65	67
HLA-A*02:02	HLA-B*44:02	HLA-C*14:02	885	897	897	67	67	69
HLA-A*02:02	HLA-B*44:02	HLA-C*15:02	717	731	727	54	54	55
HLA-A*02:02	HLA-B*44:02	HLA-C*16:01	837	851	847	72	72	73
HLA-A*02:02	HLA-B*44:02	HLA-C*17:01	705	719	714	52	52	52
HLA-A*02:02	HLA-B*44:03	HLA-C*01:02	704	718	712	52	52	51
HLA-A*02:02	HLA-B*44:03	HLA-C*02:02	707	721	716	50	50	50
HLA-A*02:02	HLA-B*44:03	HLA-C*02:10	707	721	716	50	50	50
HLA-A*02:02	HLA-B*44:03	HLA-C*03:02	881	895	890	76	76	76
HLA-A*02:02	HLA-B*44:03	HLA-C*03:03	784	798	793	61	61	61
HLA-A*02:02	HLA-B*44:03	HLA-C*03:04	784	798	793	61	61	61
HLA-A*02:02	HLA-B*44:03	HLA-C*04:01	699	713	708	50	50	50
HLA-A*02:02	HLA-B*44:03	HLA-C*05:01	721	735	730	51	51	51
HLA-A*02:02	HLA-B*44:03	HLA-C*06:02	705	719	714	51	51	51
HLA-A*02:02	HLA-B*44:03	HLA-C*07:01	701	715	710	50	50	50
HLA-A*02:02	HLA-B*44:03	HLA-C*07:02	710	724	719	50	50	50
HLA-A*02:02	HLA-B*44:03	HLA-C*08:01	701	715	710	50	50	50
HLA-A*02:02	HLA-B*44:03	HLA-C*08:02	713	727	722	51	51	51
HLA-A*02:02	HLA-B*44:03	HLA-C*12:02	726	740	735	52	52	52
HLA-A*02:02	HLA-B*44:03	HLA-C*12:03	791	804	802	63	63	65
HLA-A*02:02	HLA-B*44:03	HLA-C*14:02	887	899	899	65	65	67
HLA-A*02:02	HLA-B*44:03	HLA-C*15:02	719	733	729	52	52	53
HLA-A*02:02	HLA-B*44:03	HLA-C*16:01	839	853	849	70	70	71
HLA-A*02:02	HLA-B*44:03	HLA-C*17:01	707	721	716	50	50	50
HLA-A*02:02	HLA-B*45:01	HLA-C*01:02	696	709	704	53	53	53
HLA-A*02:02	HLA-B*45:01	HLA-C*02:02	699	712	708	51	51	52
HLA-A*02:02	HLA-B*45:01	HLA-C*02:10	699	712	708	51	51	52
HLA-A*02:02	HLA-B*45:01	HLA-C*03:02	873	886	882	77	77	78
HLA-A*02:02	HLA-B*45:01	HLA-C*03:03	776	789	785	62	62	63
HLA-A*02:02	HLA-B*45:01	HLA-C*03:04	776	789	785	62	62	63
HLA-A*02:02	HLA-B*45:01	HLA-C*04:01	691	704	700	51	51	52
HLA-A*02:02	HLA-B*45:01	HLA-C*05:01	713	726	722	52	52	53
HLA-A*02:02	HLA-B*45:01	HLA-C*06:02	697	710	706	52	52	53
HLA-A*02:02	HLA-B*45:01	HLA-C*07:01	693	706	702	51	51	52
HLA-A*02:02	HLA-B*45:01	HLA-C*07:02	702	715	711	51	51	52
HLA-A*02:02	HLA-B*45:01	HLA-C*08:01	693	706	702	51	51	52
HLA-A*02:02	HLA-B*45:01	HLA-C*08:02	705	718	714	52	52	53
HLA-A*02:02	HLA-B*45:01	HLA-C*12:02	718	731	727	53	53	54
HLA-A*02:02	HLA-B*45:01	HLA-C*12:03	783	795	794	64	64	67
HLA-A*02:02	HLA-B*45:01	HLA-C*14:02	879	890	891	66	66	69
HLA-A*02:02	HLA-B*45:01	HLA-C*15:02	711	724	721	53	53	55
HLA-A*02:02	HLA-B*45:01	HLA-C*16:01	831	844	841	71	71	73
HLA-A*02:02	HLA-B*45:01	HLA-C*17:01	699	712	708	51	51	52
HLA-A*02:02	HLA-B*50:01	HLA-C*01:02	687	700	695	50	50	50
HLA-A*02:02	HLA-B*50:01	HLA-C*02:02	690	703	699	48	48	49
HLA-A*02:02	HLA-B*50:01	HLA-C*02:10	690	703	699	48	48	49
HLA-A*02:02	HLA-B*50:01	HLA-C*03:02	864	877	873	74	74	75
HLA-A*02:02	HLA-B*50:01	HLA-C*03:03	767	780	776	59	59	60
HLA-A*02:02	HLA-B*50:01	HLA-C*03:04	767	780	776	59	59	60
HLA-A*02:02	HLA-B*50:01	HLA-C*04:01	682	695	691	48	48	49
HLA-A*02:02	HLA-B*50:01	HLA-C*05:01	704	717	713	49	49	50
HLA-A*02:02	HLA-B*50:01	HLA-C*06:02	688	701	697	49	49	50
HLA-A*02:02	HLA-B*50:01	HLA-C*07:01	684	697	693	48	48	49
HLA-A*02:02	HLA-B*50:01	HLA-C*07:02	693	706	702	48	48	49
HLA-A*02:02	HLA-B*50:01	HLA-C*08:01	684	697	693	48	48	49
HLA-A*02:02	HLA-B*50:01	HLA-C*08:02	696	709	705	49	49	50
HLA-A*02:02	HLA-B*50:01	HLA-C*12:02	709	722	718	50	50	51
HLA-A*02:02	HLA-B*50:01	HLA-C*12:03	774	786	785	61	61	64
HLA-A*02:02	HLA-B*50:01	HLA-C*14:02	870	881	882	63	63	66
HLA-A*02:02	HLA-B*50:01	HLA-C*15:02	702	715	712	50	50	52
HLA-A*02:02	HLA-B*50:01	HLA-C*16:01	822	835	832	68	68	70
HLA-A*02:02	HLA-B*50:01	HLA-C*17:01	690	703	699	48	48	49
HLA-A*02:02	HLA-B*51:01	HLA-C*01:02	679	692	687	49	49	49
HLA-A*02:02	HLA-B*51:01	HLA-C*02:02	682	695	691	47	47	48
HLA-A*02:02	HLA-B*51:01	HLA-C*02:10	682	695	691	47	47	48
HLA-A*02:02	HLA-B*51:01	HLA-C*03:02	856	869	865	73	73	74
HLA-A*02:02	HLA-B*51:01	HLA-C*03:03	759	772	768	58	58	59
HLA-A*02:02	HLA-B*51:01	HLA-C*03:04	759	772	768	58	58	59
HLA-A*02:02	HLA-B*51:01	HLA-C*04:01	674	687	683	47	47	48
HLA-A*02:02	HLA-B*51:01	HLA-C*05:01	696	709	705	48	48	49
HLA-A*02:02	HLA-B*51:01	HLA-C*06:02	680	693	689	48	48	49
HLA-A*02:02	HLA-B*51:01	HLA-C*07:01	676	689	685	47	47	48
HLA-A*02:02	HLA-B*51:01	HLA-C*07:02	685	698	694	47	47	48
HLA-A*02:02	HLA-B*51:01	HLA-C*08:01	676	689	685	47	47	48
HLA-A*02:02	HLA-B*51:01	HLA-C*08:02	688	701	697	48	48	49
HLA-A*02:02	HLA-B*51:01	HLA-C*12:02	701	714	710	49	49	50
HLA-A*02:02	HLA-B*51:01	HLA-C*12:03	766	778	777	60	60	63
HLA-A*02:02	HLA-B*51:01	HLA-C*14:02	862	873	874	62	62	65
HLA-A*02:02	HLA-B*51:01	HLA-C*15:02	694	707	704	49	49	51
HLA-A*02:02	HLA-B*51:01	HLA-C*16:01	814	827	824	67	67	69
HLA-A*02:02	HLA-B*51:01	HLA-C*17:01	682	695	691	47	47	48
HLA-A*02:02	HLA-B*52:01	HLA-C*01:02	677	690	685	49	49	49
HLA-A*02:02	HLA-B*52:01	HLA-C*02:02	680	693	689	47	47	48
HLA-A*02:02	HLA-B*52:01	HLA-C*02:10	680	693	689	47	47	48
HLA-A*02:02	HLA-B*52:01	HLA-C*03:02	854	867	863	73	73	74
HLA-A*02:02	HLA-B*52:01	HLA-C*03:03	757	770	766	58	58	59
HLA-A*02:02	HLA-B*52:01	HLA-C*03:04	757	770	766	58	58	59
HLA-A*02:02	HLA-B*52:01	HLA-C*04:01	672	685	681	47	47	48
HLA-A*02:02	HLA-B*52:01	HLA-C*05:01	694	707	703	48	48	49
HLA-A*02:02	HLA-B*52:01	HLA-C*06:02	678	691	687	48	48	49
HLA-A*02:02	HLA-B*52:01	HLA-C*07:01	674	687	683	47	47	48
HLA-A*02:02	HLA-B*52:01	HLA-C*07:02	683	696	692	47	47	48
HLA-A*02:02	HLA-B*52:01	HLA-C*08:01	674	687	683	47	47	48
HLA-A*02:02	HLA-B*52:01	HLA-C*08:02	686	699	695	48	48	49
HLA-A*02:02	HLA-B*52:01	HLA-C*12:02	699	712	708	49	49	50
HLA-A*02:02	HLA-B*52:01	HLA-C*12:03	764	776	775	60	60	63
HLA-A*02:02	HLA-B*52:01	HLA-C*14:02	860	871	872	62	62	65
HLA-A*02:02	HLA-B*52:01	HLA-C*15:02	692	705	702	49	49	51
HLA-A*02:02	HLA-B*52:01	HLA-C*16:01	812	825	822	67	67	69
HLA-A*02:02	HLA-B*52:01	HLA-C*17:01	680	693	689	47	47	48
HLA-A*02:02	HLA-B*53:01	HLA-C*01:02	718	731	726	60	60	60
HLA-A*02:02	HLA-B*53:01	HLA-C*02:02	721	734	730	58	58	59
HLA-A*02:02	HLA-B*53:01	HLA-C*02:10	721	734	730	58	58	59
HLA-A*02:02	HLA-B*53:01	HLA-C*03:02	893	906	902	83	83	84
HLA-A*02:02	HLA-B*53:01	HLA-C*03:03	797	810	806	68	68	69
HLA-A*02:02	HLA-B*53:01	HLA-C*03:04	797	810	806	68	68	69
HLA-A*02:02	HLA-B*53:01	HLA-C*04:01	713	726	722	58	58	59
HLA-A*02:02	HLA-B*53:01	HLA-C*05:01	735	748	744	59	59	60
HLA-A*02:02	HLA-B*53:01	HLA-C*06:02	719	732	728	59	59	60
HLA-A*02:02	HLA-B*53:01	HLA-C*07:01	715	728	724	58	58	59
HLA-A*02:02	HLA-B*53:01	HLA-C*07:02	724	737	733	58	58	59
HLA-A*02:02	HLA-B*53:01	HLA-C*08:01	715	728	724	58	58	59
HLA-A*02:02	HLA-B*53:01	HLA-C*08:02	727	740	736	59	59	60
HLA-A*02:02	HLA-B*53:01	HLA-C*12:02	739	752	748	59	59	60
HLA-A*02:02	HLA-B*53:01	HLA-C*12:03	804	816	815	70	70	73
HLA-A*02:02	HLA-B*53:01	HLA-C*14:02	901	912	913	73	73	76
HLA-A*02:02	HLA-B*53:01	HLA-C*15:02	733	746	743	60	60	62
HLA-A*02:02	HLA-B*53:01	HLA-C*16:01	852	865	862	77	77	79
HLA-A*02:02	HLA-B*53:01	HLA-C*17:01	721	734	730	58	58	59
HLA-A*02:02	HLA-B*57:01	HLA-C*01:02	739	752	748	55	55	56
HLA-A*02:02	HLA-B*57:01	HLA-C*02:02	742	755	752	53	53	55
HLA-A*02:02	HLA-B*57:01	HLA-C*02:10	742	755	752	53	53	55
HLA-A*02:02	HLA-B*57:01	HLA-C*03:02	912	925	921	79	79	80
HLA-A*02:02	HLA-B*57:01	HLA-C*03:03	818	831	828	64	64	66
HLA-A*02:02	HLA-B*57:01	HLA-C*03:04	818	831	828	64	64	66
HLA-A*02:02	HLA-B*57:01	HLA-C*04:01	734	747	744	53	53	55
HLA-A*02:02	HLA-B*57:01	HLA-C*05:01	756	769	766	54	54	56
HLA-A*02:02	HLA-B*57:01	HLA-C*06:02	740	753	750	54	54	56
HLA-A*02:02	HLA-B*57:01	HLA-C*07:01	736	749	746	53	53	55
HLA-A*02:02	HLA-B*57:01	HLA-C*07:02	745	758	755	53	53	55
HLA-A*02:02	HLA-B*57:01	HLA-C*08:01	736	749	746	53	53	55
HLA-A*02:02	HLA-B*57:01	HLA-C*08:02	748	761	758	54	54	56
HLA-A*02:02	HLA-B*57:01	HLA-C*12:02	760	773	770	55	55	57
HLA-A*02:02	HLA-B*57:01	HLA-C*12:03	825	837	836	66	66	69
HLA-A*02:02	HLA-B*57:01	HLA-C*14:02	922	933	935	68	68	72
HLA-A*02:02	HLA-B*57:01	HLA-C*15:02	754	767	765	55	55	58
HLA-A*02:02	HLA-B*57:01	HLA-C*16:01	872	885	882	73	73	75
HLA-A*02:02	HLA-B*57:01	HLA-C*17:01	742	755	752	53	53	55
HLA-A*02:02	HLA-B*58:01	HLA-C*01:02	826	839	837	63	63	65
HLA-A*02:02	HLA-B*58:01	HLA-C*02:02	828	841	840	61	61	64
HLA-A*02:02	HLA-B*58:01	HLA-C*02:10	828	841	840	61	61	64
HLA-A*02:02	HLA-B*58:01	HLA-C*03:02	991	1004	1002	84	84	86
HLA-A*02:02	HLA-B*58:01	HLA-C*03:03	900	913	912	69	69	72
HLA-A*02:02	HLA-B*58:01	HLA-C*03:04	900	913	912	69	69	72
HLA-A*02:02	HLA-B*58:01	HLA-C*04:01	821	834	833	61	61	64
HLA-A*02:02	HLA-B*58:01	HLA-C*05:01	843	856	855	62	62	65
HLA-A*02:02	HLA-B*58:01	HLA-C*06:02	827	840	839	62	62	65
HLA-A*02:02	HLA-B*58:01	HLA-C*07:01	823	836	835	61	61	64
HLA-A*02:02	HLA-B*58:01	HLA-C*07:02	832	845	844	61	61	64
HLA-A*02:02	HLA-B*58:01	HLA-C*08:01	823	836	835	61	61	64
HLA-A*02:02	HLA-B*58:01	HLA-C*08:02	835	848	847	62	62	65
HLA-A*02:02	HLA-B*58:01	HLA-C*12:02	844	857	856	61	61	64
HLA-A*02:02	HLA-B*58:01	HLA-C*12:03	906	918	919	71	71	75
HLA-A*02:02	HLA-B*58:01	HLA-C*14:02	1008	1019	1023	76	76	81
HLA-A*02:02	HLA-B*58:01	HLA-C*15:02	839	852	852	63	63	67
HLA-A*02:02	HLA-B*58:01	HLA-C*16:01	951	964	963	78	78	81
HLA-A*02:02	HLA-B*58:01	HLA-C*17:01	828	841	840	61	61	64
HLA-A*02:02	HLA-B*58:02	HLA-C*01:02	677	690	685	49	49	49
HLA-A*02:02	HLA-B*58:02	HLA-C*02:02	680	693	689	47	47	48
HLA-A*02:02	HLA-B*58:02	HLA-C*02:10	680	693	689	47	47	48
HLA-A*02:02	HLA-B*58:02	HLA-C*03:02	854	867	863	73	73	74
HLA-A*02:02	HLA-B*58:02	HLA-C*03:03	757	770	766	58	58	59
HLA-A*02:02	HLA-B*58:02	HLA-C*03:04	757	770	766	58	58	59
HLA-A*02:02	HLA-B*58:02	HLA-C*04:01	672	685	681	47	47	48
HLA-A*02:02	HLA-B*58:02	HLA-C*05:01	694	707	703	48	48	49
HLA-A*02:02	HLA-B*58:02	HLA-C*06:02	678	691	687	48	48	49
HLA-A*02:02	HLA-B*58:02	HLA-C*07:01	674	687	683	47	47	48
HLA-A*02:02	HLA-B*58:02	HLA-C*07:02	683	696	692	47	47	48
HLA-A*02:02	HLA-B*58:02	HLA-C*08:01	674	687	683	47	47	48
HLA-A*02:02	HLA-B*58:02	HLA-C*08:02	686	699	695	48	48	49
HLA-A*02:02	HLA-B*58:02	HLA-C*12:02	699	712	708	49	49	50
HLA-A*02:02	HLA-B*58:02	HLA-C*12:03	764	776	775	60	60	63
HLA-A*02:02	HLA-B*58:02	HLA-C*14:02	860	871	872	62	62	65
HLA-A*02:02	HLA-B*58:02	HLA-C*15:02	692	705	702	49	49	51
HLA-A*02:02	HLA-B*58:02	HLA-C*16:01	812	825	822	67	67	69
HLA-A*02:02	HLA-B*58:02	HLA-C*17:01	680	693	689	47	47	48
HLA-A*02:06	HLA-B*07:02	HLA-C*01:02	423	426	424	42	37	36
HLA-A*02:06	HLA-B*07:02	HLA-C*02:02	426	429	428	40	35	35
HLA-A*02:06	HLA-B*07:02	HLA-C*02:10	426	429	428	40	35	35
HLA-A*02:06	HLA-B*07:02	HLA-C*03:02	598	601	600	66	61	61
HLA-A*02:06	HLA-B*07:02	HLA-C*03:03	498	501	500	51	46	46
HLA-A*02:06	HLA-B*07:02	HLA-C*03:04	498	501	500	51	46	46
HLA-A*02:06	HLA-B*07:02	HLA-C*04:01	418	421	420	40	35	35
HLA-A*02:06	HLA-B*07:02	HLA-C*05:01	439	442	440	41	36	36
HLA-A*02:06	HLA-B*07:02	HLA-C*06:02	424	427	426	41	36	36
HLA-A*02:06	HLA-B*07:02	HLA-C*07:01	420	423	422	40	35	35
HLA-A*02:06	HLA-B*07:02	HLA-C*07:02	429	432	431	40	35	35
HLA-A*02:06	HLA-B*07:02	HLA-C*08:01	419	422	421	40	35	35
HLA-A*02:06	HLA-B*07:02	HLA-C*08:02	432	435	433	41	36	36
HLA-A*02:06	HLA-B*07:02	HLA-C*12:02	445	448	447	42	37	37
HLA-A*02:06	HLA-B*07:02	HLA-C*12:03	501	503	504	52	47	48
HLA-A*02:06	HLA-B*07:02	HLA-C*14:02	610	611	615	55	50	52
HLA-A*02:06	HLA-B*07:02	HLA-C*15:02	433	436	435	41	36	36
HLA-A*02:06	HLA-B*07:02	HLA-C*16:01	553	556	555	59	54	54
HLA-A*02:06	HLA-B*07:02	HLA-C*17:01	425	428	427	40	35	35
HLA-A*02:06	HLA-B*08:01	HLA-C*01:02	405	412	409	38	38	36
HLA-A*02:06	HLA-B*08:01	HLA-C*02:02	408	415	413	36	36	35
HLA-A*02:06	HLA-B*08:01	HLA-C*02:10	408	415	413	36	36	35
HLA-A*02:06	HLA-B*08:01	HLA-C*03:02	575	582	580	62	62	61
HLA-A*02:06	HLA-B*08:01	HLA-C*03:03	476	483	481	47	47	46
HLA-A*02:06	HLA-B*08:01	HLA-C*03:04	476	483	481	47	47	46
HLA-A*02:06	HLA-B*08:01	HLA-C*04:01	400	407	405	36	36	35
HLA-A*02:06	HLA-B*08:01	HLA-C*05:01	421	428	425	37	37	36
HLA-A*02:06	HLA-B*08:01	HLA-C*06:02	406	413	411	37	37	36
HLA-A*02:06	HLA-B*08:01	HLA-C*07:01	402	409	407	36	36	35
HLA-A*02:06	HLA-B*08:01	HLA-C*07:02	411	418	416	36	36	35
HLA-A*02:06	HLA-B*08:01	HLA-C*08:01	401	408	406	36	36	35
HLA-A*02:06	HLA-B*08:01	HLA-C*08:02	414	421	418	37	37	36
HLA-A*02:06	HLA-B*08:01	HLA-C*12:02	425	432	430	38	38	37
HLA-A*02:06	HLA-B*08:01	HLA-C*12:03	478	484	484	48	48	48
HLA-A*02:06	HLA-B*08:01	HLA-C*14:02	590	595	598	51	51	52
HLA-A*02:06	HLA-B*08:01	HLA-C*15:02	414	421	419	37	37	36
HLA-A*02:06	HLA-B*08:01	HLA-C*16:01	530	537	535	55	55	54
HLA-A*02:06	HLA-B*08:01	HLA-C*17:01	407	414	412	36	36	35
HLA-A*02:06	HLA-B*14:02	HLA-C*01:02	369	374	373	36	35	34
HLA-A*02:06	HLA-B*14:02	HLA-C*02:02	372	377	377	34	33	33
HLA-A*02:06	HLA-B*14:02	HLA-C*02:10	372	377	377	34	33	33
HLA-A*02:06	HLA-B*14:02	HLA-C*03:02	545	550	550	60	59	59
HLA-A*02:06	HLA-B*14:02	HLA-C*03:03	445	450	450	45	44	44
HLA-A*02:06	HLA-B*14:02	HLA-C*03:04	445	450	450	45	44	44
HLA-A*02:06	HLA-B*14:02	HLA-C*04:01	364	369	369	34	33	33
HLA-A*02:06	HLA-B*14:02	HLA-C*05:01	385	390	389	35	34	34
HLA-A*02:06	HLA-B*14:02	HLA-C*06:02	370	375	375	35	34	34
HLA-A*02:06	HLA-B*14:02	HLA-C*07:01	366	371	371	34	33	33
HLA-A*02:06	HLA-B*14:02	HLA-C*07:02	375	380	380	34	33	33
HLA-A*02:06	HLA-B*14:02	HLA-C*08:01	365	370	370	34	33	33
HLA-A*02:06	HLA-B*14:02	HLA-C*08:02	378	383	382	35	34	34
HLA-A*02:06	HLA-B*14:02	HLA-C*12:02	391	396	396	36	35	35
HLA-A*02:06	HLA-B*14:02	HLA-C*12:03	448	452	454	46	45	46
HLA-A*02:06	HLA-B*14:02	HLA-C*14:02	556	559	564	49	48	50
HLA-A*02:06	HLA-B*14:02	HLA-C*15:02	379	384	384	35	34	34
HLA-A*02:06	HLA-B*14:02	HLA-C*16:01	500	505	505	53	52	52
HLA-A*02:06	HLA-B*14:02	HLA-C*17:01	371	376	376	34	33	33
HLA-A*02:06	HLA-B*15:01	HLA-C*01:02	536	542	540	50	49	46
HLA-A*02:06	HLA-B*15:01	HLA-C*02:02	537	543	542	48	47	45
HLA-A*02:06	HLA-B*15:01	HLA-C*02:10	537	543	542	48	47	45
HLA-A*02:06	HLA-B*15:01	HLA-C*03:02	672	678	677	70	69	67
HLA-A*02:06	HLA-B*15:01	HLA-C*03:03	607	613	612	59	58	56
HLA-A*02:06	HLA-B*15:01	HLA-C*03:04	607	613	612	59	58	56
HLA-A*02:06	HLA-B*15:01	HLA-C*04:01	531	537	536	48	47	45
HLA-A*02:06	HLA-B*15:01	HLA-C*05:01	552	558	556	49	48	46
HLA-A*02:06	HLA-B*15:01	HLA-C*06:02	537	543	542	49	48	46
HLA-A*02:06	HLA-B*15:01	HLA-C*07:01	533	539	538	48	47	45
HLA-A*02:06	HLA-B*15:01	HLA-C*07:02	542	548	547	48	47	45
HLA-A*02:06	HLA-B*15:01	HLA-C*08:01	532	538	537	48	47	45
HLA-A*02:06	HLA-B*15:01	HLA-C*08:02	545	551	549	49	48	46
HLA-A*02:06	HLA-B*15:01	HLA-C*12:02	555	561	560	50	49	47
HLA-A*02:06	HLA-B*15:01	HLA-C*12:03	610	615	616	60	59	58
HLA-A*02:06	HLA-B*15:01	HLA-C*14:02	717	721	725	63	62	62
HLA-A*02:06	HLA-B*15:01	HLA-C*15:02	546	552	551	49	48	46
HLA-A*02:06	HLA-B*15:01	HLA-C*16:01	655	661	660	65	64	62
HLA-A*02:06	HLA-B*15:01	HLA-C*17:01	538	544	543	48	47	45
HLA-A*02:06	HLA-B*15:03	HLA-C*01:02	818	824	826	92	91	94
HLA-A*02:06	HLA-B*15:03	HLA-C*02:02	815	821	824	90	89	93
HLA-A*02:06	HLA-B*15:03	HLA-C*02:10	815	821	824	90	89	93
HLA-A*02:06	HLA-B*15:03	HLA-C*03:02	897	903	906	100	99	103
HLA-A*02:06	HLA-B*15:03	HLA-C*03:03	877	883	886	98	97	101
HLA-A*02:06	HLA-B*15:03	HLA-C*03:04	877	883	886	98	97	101
HLA-A*02:06	HLA-B*15:03	HLA-C*04:01	813	819	822	90	89	93
HLA-A*02:06	HLA-B*15:03	HLA-C*05:01	834	840	842	91	90	94
HLA-A*02:06	HLA-B*15:03	HLA-C*06:02	819	825	828	91	90	94
HLA-A*02:06	HLA-B*15:03	HLA-C*07:01	815	821	824	90	89	93
HLA-A*02:06	HLA-B*15:03	HLA-C*07:02	823	829	832	90	89	93
HLA-A*02:06	HLA-B*15:03	HLA-C*08:01	814	820	823	90	89	93
HLA-A*02:06	HLA-B*15:03	HLA-C*08:02	827	833	835	91	90	94
HLA-A*02:06	HLA-B*15:03	HLA-C*12:02	823	829	832	90	89	93
HLA-A*02:06	HLA-B*15:03	HLA-C*12:03	868	873	877	95	94	98
HLA-A*02:06	HLA-B*15:03	HLA-C*14:02	990	994	1002	105	104	110
HLA-A*02:06	HLA-B*15:03	HLA-C*15:02	826	832	835	91	90	94
HLA-A*02:06	HLA-B*15:03	HLA-C*16:01	898	904	906	99	98	101
HLA-A*02:06	HLA-B*15:03	HLA-C*17:01	819	825	828	90	89	93
HLA-A*02:06	HLA-B*18:01	HLA-C*01:02	400	405	406	40	39	39
HLA-A*02:06	HLA-B*18:01	HLA-C*02:02	403	408	410	38	37	38
HLA-A*02:06	HLA-B*18:01	HLA-C*02:10	403	408	410	38	37	38
HLA-A*02:06	HLA-B*18:01	HLA-C*03:02	576	581	583	64	63	64
HLA-A*02:06	HLA-B*18:01	HLA-C*03:03	476	481	483	49	48	49
HLA-A*02:06	HLA-B*18:01	HLA-C*03:04	476	481	483	49	48	49
HLA-A*02:06	HLA-B*18:01	HLA-C*04:01	395	400	402	38	37	38
HLA-A*02:06	HLA-B*18:01	HLA-C*05:01	416	421	422	39	38	39
HLA-A*02:06	HLA-B*18:01	HLA-C*06:02	401	406	408	39	38	39
HLA-A*02:06	HLA-B*18:01	HLA-C*07:01	397	402	404	38	37	38
HLA-A*02:06	HLA-B*18:01	HLA-C*07:02	406	411	413	38	37	38
HLA-A*02:06	HLA-B*18:01	HLA-C*08:01	396	401	403	38	37	38
HLA-A*02:06	HLA-B*18:01	HLA-C*08:02	409	414	415	39	38	39
HLA-A*02:06	HLA-B*18:01	HLA-C*12:02	422	427	429	40	39	40
HLA-A*02:06	HLA-B*18:01	HLA-C*12:03	479	483	487	50	49	51
HLA-A*02:06	HLA-B*18:01	HLA-C*14:02	587	590	597	53	52	55
HLA-A*02:06	HLA-B*18:01	HLA-C*15:02	410	415	417	39	38	39
HLA-A*02:06	HLA-B*18:01	HLA-C*16:01	531	536	538	57	56	57
HLA-A*02:06	HLA-B*18:01	HLA-C*17:01	402	407	409	38	37	38
HLA-A*02:06	HLA-B*27:05	HLA-C*01:02	411	419	415	41	43	39
HLA-A*02:06	HLA-B*27:05	HLA-C*02:02	414	422	419	39	41	38
HLA-A*02:06	HLA-B*27:05	HLA-C*02:10	414	422	419	39	41	38
HLA-A*02:06	HLA-B*27:05	HLA-C*03:02	587	595	592	65	67	64
HLA-A*02:06	HLA-B*27:05	HLA-C*03:03	487	495	492	50	52	49
HLA-A*02:06	HLA-B*27:05	HLA-C*03:04	487	495	492	50	52	49
HLA-A*02:06	HLA-B*27:05	HLA-C*04:01	406	414	411	39	41	38
HLA-A*02:06	HLA-B*27:05	HLA-C*05:01	427	435	431	40	42	39
HLA-A*02:06	HLA-B*27:05	HLA-C*06:02	411	419	416	40	42	39
HLA-A*02:06	HLA-B*27:05	HLA-C*07:01	407	415	412	39	41	38
HLA-A*02:06	HLA-B*27:05	HLA-C*07:02	416	424	421	39	41	38
HLA-A*02:06	HLA-B*27:05	HLA-C*08:01	407	415	412	39	41	38
HLA-A*02:06	HLA-B*27:05	HLA-C*08:02	420	428	424	40	42	39
HLA-A*02:06	HLA-B*27:05	HLA-C*12:02	433	441	438	41	43	40
HLA-A*02:06	HLA-B*27:05	HLA-C*12:03	490	497	496	51	53	51
HLA-A*02:06	HLA-B*27:05	HLA-C*14:02	597	603	605	54	56	55
HLA-A*02:06	HLA-B*27:05	HLA-C*15:02	421	429	426	40	42	39
HLA-A*02:06	HLA-B*27:05	HLA-C*16:01	542	550	547	58	60	57
HLA-A*02:06	HLA-B*27:05	HLA-C*17:01	413	421	418	39	41	38
HLA-A*02:06	HLA-B*35:01	HLA-C*01:02	476	483	482	56	55	55
HLA-A*02:06	HLA-B*35:01	HLA-C*02:02	472	479	479	54	53	54
HLA-A*02:06	HLA-B*35:01	HLA-C*02:10	472	479	479	54	53	54
HLA-A*02:06	HLA-B*35:01	HLA-C*03:02	605	612	612	72	71	72
HLA-A*02:06	HLA-B*35:01	HLA-C*03:03	541	548	548	63	62	63
HLA-A*02:06	HLA-B*35:01	HLA-C*03:04	541	548	548	63	62	63
HLA-A*02:06	HLA-B*35:01	HLA-C*04:01	471	478	478	54	53	54
HLA-A*02:06	HLA-B*35:01	HLA-C*05:01	491	498	497	55	54	55
HLA-A*02:06	HLA-B*35:01	HLA-C*06:02	477	484	484	55	54	55
HLA-A*02:06	HLA-B*35:01	HLA-C*07:01	473	480	480	54	53	54
HLA-A*02:06	HLA-B*35:01	HLA-C*07:02	482	489	489	54	53	54
HLA-A*02:06	HLA-B*35:01	HLA-C*08:01	471	478	478	54	53	54
HLA-A*02:06	HLA-B*35:01	HLA-C*08:02	484	491	490	55	54	55
HLA-A*02:06	HLA-B*35:01	HLA-C*12:02	484	491	491	54	53	54
HLA-A*02:06	HLA-B*35:01	HLA-C*12:03	537	543	545	61	60	62
HLA-A*02:06	HLA-B*35:01	HLA-C*14:02	659	664	669	69	68	71
HLA-A*02:06	HLA-B*35:01	HLA-C*15:02	486	493	493	55	54	55
HLA-A*02:06	HLA-B*35:01	HLA-C*16:01	581	588	588	68	67	68
HLA-A*02:06	HLA-B*35:01	HLA-C*17:01	477	484	484	54	53	54
HLA-A*02:06	HLA-B*35:03	HLA-C*01:02	370	376	375	36	35	34
HLA-A*02:06	HLA-B*35:03	HLA-C*02:02	373	379	379	34	33	33
HLA-A*02:06	HLA-B*35:03	HLA-C*02:10	373	379	379	34	33	33
HLA-A*02:06	HLA-B*35:03	HLA-C*03:02	546	552	552	60	59	59
HLA-A*02:06	HLA-B*35:03	HLA-C*03:03	446	452	452	45	44	44
HLA-A*02:06	HLA-B*35:03	HLA-C*03:04	446	452	452	45	44	44
HLA-A*02:06	HLA-B*35:03	HLA-C*04:01	365	371	371	34	33	33
HLA-A*02:06	HLA-B*35:03	HLA-C*05:01	386	392	391	35	34	34
HLA-A*02:06	HLA-B*35:03	HLA-C*06:02	371	377	377	35	34	34
HLA-A*02:06	HLA-B*35:03	HLA-C*07:01	367	373	373	34	33	33
HLA-A*02:06	HLA-B*35:03	HLA-C*07:02	376	382	382	34	33	33
HLA-A*02:06	HLA-B*35:03	HLA-C*08:01	366	372	372	34	33	33
HLA-A*02:06	HLA-B*35:03	HLA-C*08:02	379	385	384	35	34	34
HLA-A*02:06	HLA-B*35:03	HLA-C*12:02	392	398	398	36	35	35
HLA-A*02:06	HLA-B*35:03	HLA-C*12:03	449	454	456	46	45	46
HLA-A*02:06	HLA-B*35:03	HLA-C*14:02	557	561	566	49	48	50
HLA-A*02:06	HLA-B*35:03	HLA-C*15:02	380	386	386	35	34	34
HLA-A*02:06	HLA-B*35:03	HLA-C*16:01	501	507	507	53	52	52
HLA-A*02:06	HLA-B*35:03	HLA-C*17:01	372	378	378	34	33	33
HLA-A*02:06	HLA-B*38:01	HLA-C*01:02	370	375	374	36	35	34
HLA-A*02:06	HLA-B*38:01	HLA-C*02:02	373	378	378	34	33	33
HLA-A*02:06	HLA-B*38:01	HLA-C*02:10	373	378	378	34	33	33
HLA-A*02:06	HLA-B*38:01	HLA-C*03:02	546	551	551	60	59	59
HLA-A*02:06	HLA-B*38:01	HLA-C*03:03	446	451	451	45	44	44
HLA-A*02:06	HLA-B*38:01	HLA-C*03:04	446	451	451	45	44	44
HLA-A*02:06	HLA-B*38:01	HLA-C*04:01	365	370	370	34	33	33
HLA-A*02:06	HLA-B*38:01	HLA-C*05:01	386	391	390	35	34	34
HLA-A*02:06	HLA-B*38:01	HLA-C*06:02	371	376	376	35	34	34
HLA-A*02:06	HLA-B*38:01	HLA-C*07:01	367	372	372	34	33	33
HLA-A*02:06	HLA-B*38:01	HLA-C*07:02	376	381	381	34	33	33
HLA-A*02:06	HLA-B*38:01	HLA-C*08:01	366	371	371	34	33	33
HLA-A*02:06	HLA-B*38:01	HLA-C*08:02	379	384	383	35	34	34
HLA-A*02:06	HLA-B*38:01	HLA-C*12:02	392	397	397	36	35	35
HLA-A*02:06	HLA-B*38:01	HLA-C*12:03	449	453	455	46	45	46
HLA-A*02:06	HLA-B*38:01	HLA-C*14:02	557	560	565	49	48	50
HLA-A*02:06	HLA-B*38:01	HLA-C*15:02	380	385	385	35	34	34
HLA-A*02:06	HLA-B*38:01	HLA-C*16:01	501	506	506	53	52	52
HLA-A*02:06	HLA-B*38:01	HLA-C*17:01	372	377	377	34	33	33
HLA-A*02:06	HLA-B*40:01	HLA-C*01:02	431	437	434	38	37	36
HLA-A*02:06	HLA-B*40:01	HLA-C*02:02	434	440	438	36	35	35
HLA-A*02:06	HLA-B*40:01	HLA-C*02:10	434	440	438	36	35	35
HLA-A*02:06	HLA-B*40:01	HLA-C*03:02	607	613	611	62	61	61
HLA-A*02:06	HLA-B*40:01	HLA-C*03:03	507	513	511	47	46	46
HLA-A*02:06	HLA-B*40:01	HLA-C*03:04	507	513	511	47	46	46
HLA-A*02:06	HLA-B*40:01	HLA-C*04:01	426	432	430	36	35	35
HLA-A*02:06	HLA-B*40:01	HLA-C*05:01	447	453	450	37	36	36
HLA-A*02:06	HLA-B*40:01	HLA-C*06:02	432	438	436	37	36	36
HLA-A*02:06	HLA-B*40:01	HLA-C*07:01	428	434	432	36	35	35
HLA-A*02:06	HLA-B*40:01	HLA-C*07:02	437	443	441	36	35	35
HLA-A*02:06	HLA-B*40:01	HLA-C*08:01	427	433	431	36	35	35
HLA-A*02:06	HLA-B*40:01	HLA-C*08:02	440	446	443	37	36	36
HLA-A*02:06	HLA-B*40:01	HLA-C*12:02	453	459	457	38	37	37
HLA-A*02:06	HLA-B*40:01	HLA-C*12:03	510	515	515	48	47	48
HLA-A*02:06	HLA-B*40:01	HLA-C*14:02	618	622	625	51	50	52
HLA-A*02:06	HLA-B*40:01	HLA-C*15:02	441	447	445	37	36	36
HLA-A*02:06	HLA-B*40:01	HLA-C*16:01	562	568	566	55	54	54
HLA-A*02:06	HLA-B*40:01	HLA-C*17:01	433	439	437	36	35	35
HLA-A*02:06	HLA-B*40:02	HLA-C*01:02	438	444	441	43	42	40
HLA-A*02:06	HLA-B*40:02	HLA-C*02:02	441	447	445	41	40	39
HLA-A*02:06	HLA-B*40:02	HLA-C*02:10	441	447	445	41	40	39
HLA-A*02:06	HLA-B*40:02	HLA-C*03:02	614	620	618	67	66	65
HLA-A*02:06	HLA-B*40:02	HLA-C*03:03	514	520	518	52	51	50
HLA-A*02:06	HLA-B*40:02	HLA-C*03:04	514	520	518	52	51	50
HLA-A*02:06	HLA-B*40:02	HLA-C*04:01	433	439	437	41	40	39
HLA-A*02:06	HLA-B*40:02	HLA-C*05:01	454	460	457	42	41	40
HLA-A*02:06	HLA-B*40:02	HLA-C*06:02	439	445	443	42	41	40
HLA-A*02:06	HLA-B*40:02	HLA-C*07:01	435	441	439	41	40	39
HLA-A*02:06	HLA-B*40:02	HLA-C*07:02	444	450	448	41	40	39
HLA-A*02:06	HLA-B*40:02	HLA-C*08:01	434	440	438	41	40	39
HLA-A*02:06	HLA-B*40:02	HLA-C*08:02	447	453	450	42	41	40
HLA-A*02:06	HLA-B*40:02	HLA-C*12:02	460	466	464	43	42	41
HLA-A*02:06	HLA-B*40:02	HLA-C*12:03	517	522	522	53	52	52
HLA-A*02:06	HLA-B*40:02	HLA-C*14:02	625	629	632	56	55	56
HLA-A*02:06	HLA-B*40:02	HLA-C*15:02	448	454	452	42	41	40
HLA-A*02:06	HLA-B*40:02	HLA-C*16:01	569	575	573	60	59	58
HLA-A*02:06	HLA-B*40:02	HLA-C*17:01	440	446	444	41	40	39
HLA-A*02:06	HLA-B*40:06	HLA-C*01:02	377	382	381	37	36	35
HLA-A*02:06	HLA-B*40:06	HLA-C*02:02	380	385	385	35	34	34
HLA-A*02:06	HLA-B*40:06	HLA-C*02:10	380	385	385	35	34	34
HLA-A*02:06	HLA-B*40:06	HLA-C*03:02	553	558	558	61	60	60
HLA-A*02:06	HLA-B*40:06	HLA-C*03:03	453	458	458	46	45	45
HLA-A*02:06	HLA-B*40:06	HLA-C*03:04	453	458	458	46	45	45
HLA-A*02:06	HLA-B*40:06	HLA-C*04:01	372	377	377	35	34	34
HLA-A*02:06	HLA-B*40:06	HLA-C*05:01	393	398	397	36	35	35
HLA-A*02:06	HLA-B*40:06	HLA-C*06:02	378	383	383	36	35	35
HLA-A*02:06	HLA-B*40:06	HLA-C*07:01	374	379	379	35	34	34
HLA-A*02:06	HLA-B*40:06	HLA-C*07:02	383	388	388	35	34	34
HLA-A*02:06	HLA-B*40:06	HLA-C*08:01	373	378	378	35	34	34
HLA-A*02:06	HLA-B*40:06	HLA-C*08:02	386	391	390	36	35	35
HLA-A*02:06	HLA-B*40:06	HLA-C*12:02	399	404	404	37	36	36
HLA-A*02:06	HLA-B*40:06	HLA-C*12:03	456	460	462	47	46	47
HLA-A*02:06	HLA-B*40:06	HLA-C*14:02	564	567	572	50	49	51
HLA-A*02:06	HLA-B*40:06	HLA-C*15:02	387	392	392	36	35	35
HLA-A*02:06	HLA-B*40:06	HLA-C*16:01	508	513	513	54	53	53
HLA-A*02:06	HLA-B*40:06	HLA-C*17:01	379	384	384	35	34	34
HLA-A*02:06	HLA-B*42:01	HLA-C*01:02	471	475	475	48	44	43
HLA-A*02:06	HLA-B*42:01	HLA-C*02:02	474	478	479	46	42	42
HLA-A*02:06	HLA-B*42:01	HLA-C*02:10	474	478	479	46	42	42
HLA-A*02:06	HLA-B*42:01	HLA-C*03:02	646	650	651	72	68	68
HLA-A*02:06	HLA-B*42:01	HLA-C*03:03	546	550	551	57	53	53
HLA-A*02:06	HLA-B*42:01	HLA-C*03:04	546	550	551	57	53	53
HLA-A*02:06	HLA-B*42:01	HLA-C*04:01	466	470	471	46	42	42
HLA-A*02:06	HLA-B*42:01	HLA-C*05:01	487	491	491	47	43	43
HLA-A*02:06	HLA-B*42:01	HLA-C*06:02	472	476	477	47	43	43
HLA-A*02:06	HLA-B*42:01	HLA-C*07:01	468	472	473	46	42	42
HLA-A*02:06	HLA-B*42:01	HLA-C*07:02	477	481	482	46	42	42
HLA-A*02:06	HLA-B*42:01	HLA-C*08:01	467	471	472	46	42	42
HLA-A*02:06	HLA-B*42:01	HLA-C*08:02	480	484	484	47	43	43
HLA-A*02:06	HLA-B*42:01	HLA-C*12:02	493	497	498	48	44	44
HLA-A*02:06	HLA-B*42:01	HLA-C*12:03	549	552	555	58	54	55
HLA-A*02:06	HLA-B*42:01	HLA-C*14:02	658	660	666	61	57	59
HLA-A*02:06	HLA-B*42:01	HLA-C*15:02	481	485	486	47	43	43
HLA-A*02:06	HLA-B*42:01	HLA-C*16:01	601	605	606	65	61	61
HLA-A*02:06	HLA-B*42:01	HLA-C*17:01	473	477	478	46	42	42
HLA-A*02:06	HLA-B*44:02	HLA-C*01:02	393	399	397	41	40	38
HLA-A*02:06	HLA-B*44:02	HLA-C*02:02	396	402	401	39	38	37
HLA-A*02:06	HLA-B*44:02	HLA-C*02:10	396	402	401	39	38	37
HLA-A*02:06	HLA-B*44:02	HLA-C*03:02	569	575	574	65	64	63
HLA-A*02:06	HLA-B*44:02	HLA-C*03:03	469	475	474	50	49	48
HLA-A*02:06	HLA-B*44:02	HLA-C*03:04	469	475	474	50	49	48
HLA-A*02:06	HLA-B*44:02	HLA-C*04:01	388	394	393	39	38	37
HLA-A*02:06	HLA-B*44:02	HLA-C*05:01	409	415	413	40	39	38
HLA-A*02:06	HLA-B*44:02	HLA-C*06:02	394	400	399	40	39	38
HLA-A*02:06	HLA-B*44:02	HLA-C*07:01	390	396	395	39	38	37
HLA-A*02:06	HLA-B*44:02	HLA-C*07:02	399	405	404	39	38	37
HLA-A*02:06	HLA-B*44:02	HLA-C*08:01	389	395	394	39	38	37
HLA-A*02:06	HLA-B*44:02	HLA-C*08:02	402	408	406	40	39	38
HLA-A*02:06	HLA-B*44:02	HLA-C*12:02	415	421	420	41	40	39
HLA-A*02:06	HLA-B*44:02	HLA-C*12:03	472	477	478	51	50	50
HLA-A*02:06	HLA-B*44:02	HLA-C*14:02	580	584	588	54	53	54
HLA-A*02:06	HLA-B*44:02	HLA-C*15:02	403	409	408	40	39	38
HLA-A*02:06	HLA-B*44:02	HLA-C*16:01	524	530	529	58	57	56
HLA-A*02:06	HLA-B*44:02	HLA-C*17:01	395	401	400	39	38	37
HLA-A*02:06	HLA-B*44:03	HLA-C*01:02	395	401	399	39	38	36
HLA-A*02:06	HLA-B*44:03	HLA-C*02:02	398	404	403	37	36	35
HLA-A*02:06	HLA-B*44:03	HLA-C*02:10	398	404	403	37	36	35
HLA-A*02:06	HLA-B*44:03	HLA-C*03:02	571	577	576	63	62	61
HLA-A*02:06	HLA-B*44:03	HLA-C*03:03	471	477	476	48	47	46
HLA-A*02:06	HLA-B*44:03	HLA-C*03:04	471	477	476	48	47	46
HLA-A*02:06	HLA-B*44:03	HLA-C*04:01	390	396	395	37	36	35
HLA-A*02:06	HLA-B*44:03	HLA-C*05:01	411	417	415	38	37	36
HLA-A*02:06	HLA-B*44:03	HLA-C*06:02	396	402	401	38	37	36
HLA-A*02:06	HLA-B*44:03	HLA-C*07:01	392	398	397	37	36	35
HLA-A*02:06	HLA-B*44:03	HLA-C*07:02	401	407	406	37	36	35
HLA-A*02:06	HLA-B*44:03	HLA-C*08:01	391	397	396	37	36	35
HLA-A*02:06	HLA-B*44:03	HLA-C*08:02	404	410	408	38	37	36
HLA-A*02:06	HLA-B*44:03	HLA-C*12:02	417	423	422	39	38	37
HLA-A*02:06	HLA-B*44:03	HLA-C*12:03	474	479	480	49	48	48
HLA-A*02:06	HLA-B*44:03	HLA-C*14:02	582	586	590	52	51	52
HLA-A*02:06	HLA-B*44:03	HLA-C*15:02	405	411	410	38	37	36
HLA-A*02:06	HLA-B*44:03	HLA-C*16:01	526	532	531	56	55	54
HLA-A*02:06	HLA-B*44:03	HLA-C*17:01	397	403	402	37	36	35
HLA-A*02:06	HLA-B*45:01	HLA-C*01:02	388	393	392	40	39	38
HLA-A*02:06	HLA-B*45:01	HLA-C*02:02	391	396	396	38	37	37
HLA-A*02:06	HLA-B*45:01	HLA-C*02:10	391	396	396	38	37	37
HLA-A*02:06	HLA-B*45:01	HLA-C*03:02	564	569	569	64	63	63
HLA-A*02:06	HLA-B*45:01	HLA-C*03:03	464	469	469	49	48	48
HLA-A*02:06	HLA-B*45:01	HLA-C*03:04	464	469	469	49	48	48
HLA-A*02:06	HLA-B*45:01	HLA-C*04:01	383	388	388	38	37	37
HLA-A*02:06	HLA-B*45:01	HLA-C*05:01	404	409	408	39	38	38
HLA-A*02:06	HLA-B*45:01	HLA-C*06:02	389	394	394	39	38	38
HLA-A*02:06	HLA-B*45:01	HLA-C*07:01	385	390	390	38	37	37
HLA-A*02:06	HLA-B*45:01	HLA-C*07:02	394	399	399	38	37	37
HLA-A*02:06	HLA-B*45:01	HLA-C*08:01	384	389	389	38	37	37
HLA-A*02:06	HLA-B*45:01	HLA-C*08:02	397	402	401	39	38	38
HLA-A*02:06	HLA-B*45:01	HLA-C*12:02	410	415	415	40	39	39
HLA-A*02:06	HLA-B*45:01	HLA-C*12:03	467	471	473	50	49	50
HLA-A*02:06	HLA-B*45:01	HLA-C*14:02	575	578	583	53	52	54
HLA-A*02:06	HLA-B*45:01	HLA-C*15:02	398	403	403	39	38	38
HLA-A*02:06	HLA-B*45:01	HLA-C*16:01	519	524	524	57	56	56
HLA-A*02:06	HLA-B*45:01	HLA-C*17:01	390	395	395	38	37	37
HLA-A*02:06	HLA-B*50:01	HLA-C*01:02	378	383	382	37	36	35
HLA-A*02:06	HLA-B*50:01	HLA-C*02:02	381	386	386	35	34	34
HLA-A*02:06	HLA-B*50:01	HLA-C*02:10	381	386	386	35	34	34
HLA-A*02:06	HLA-B*50:01	HLA-C*03:02	554	559	559	61	60	60
HLA-A*02:06	HLA-B*50:01	HLA-C*03:03	454	459	459	46	45	45
HLA-A*02:06	HLA-B*50:01	HLA-C*03:04	454	459	459	46	45	45
HLA-A*02:06	HLA-B*50:01	HLA-C*04:01	373	378	378	35	34	34
HLA-A*02:06	HLA-B*50:01	HLA-C*05:01	394	399	398	36	35	35
HLA-A*02:06	HLA-B*50:01	HLA-C*06:02	379	384	384	36	35	35
HLA-A*02:06	HLA-B*50:01	HLA-C*07:01	375	380	380	35	34	34
HLA-A*02:06	HLA-B*50:01	HLA-C*07:02	384	389	389	35	34	34
HLA-A*02:06	HLA-B*50:01	HLA-C*08:01	374	379	379	35	34	34
HLA-A*02:06	HLA-B*50:01	HLA-C*08:02	387	392	391	36	35	35
HLA-A*02:06	HLA-B*50:01	HLA-C*12:02	400	405	405	37	36	36
HLA-A*02:06	HLA-B*50:01	HLA-C*12:03	457	461	463	47	46	47
HLA-A*02:06	HLA-B*50:01	HLA-C*14:02	565	568	573	50	49	51
HLA-A*02:06	HLA-B*50:01	HLA-C*15:02	388	393	393	36	35	35
HLA-A*02:06	HLA-B*50:01	HLA-C*16:01	509	514	514	54	53	53
HLA-A*02:06	HLA-B*50:01	HLA-C*17:01	380	385	385	35	34	34
HLA-A*02:06	HLA-B*51:01	HLA-C*01:02	370	375	374	36	35	34
HLA-A*02:06	HLA-B*51:01	HLA-C*02:02	373	378	378	34	33	33
HLA-A*02:06	HLA-B*51:01	HLA-C*02:10	373	378	378	34	33	33
HLA-A*02:06	HLA-B*51:01	HLA-C*03:02	546	551	551	60	59	59
HLA-A*02:06	HLA-B*51:01	HLA-C*03:03	446	451	451	45	44	44
HLA-A*02:06	HLA-B*51:01	HLA-C*03:04	446	451	451	45	44	44
HLA-A*02:06	HLA-B*51:01	HLA-C*04:01	365	370	370	34	33	33
HLA-A*02:06	HLA-B*51:01	HLA-C*05:01	386	391	390	35	34	34
HLA-A*02:06	HLA-B*51:01	HLA-C*06:02	371	376	376	35	34	34
HLA-A*02:06	HLA-B*51:01	HLA-C*07:01	367	372	372	34	33	33
HLA-A*02:06	HLA-B*51:01	HLA-C*07:02	376	381	381	34	33	33
HLA-A*02:06	HLA-B*51:01	HLA-C*08:01	366	371	371	34	33	33
HLA-A*02:06	HLA-B*51:01	HLA-C*08:02	379	384	383	35	34	34
HLA-A*02:06	HLA-B*51:01	HLA-C*12:02	392	397	397	36	35	35
HLA-A*02:06	HLA-B*51:01	HLA-C*12:03	449	453	455	46	45	46
HLA-A*02:06	HLA-B*51:01	HLA-C*14:02	557	560	565	49	48	50
HLA-A*02:06	HLA-B*51:01	HLA-C*15:02	380	385	385	35	34	34
HLA-A*02:06	HLA-B*51:01	HLA-C*16:01	501	506	506	53	52	52
HLA-A*02:06	HLA-B*51:01	HLA-C*17:01	372	377	377	34	33	33
HLA-A*02:06	HLA-B*52:01	HLA-C*01:02	368	373	372	36	35	34
HLA-A*02:06	HLA-B*52:01	HLA-C*02:02	371	376	376	34	33	33
HLA-A*02:06	HLA-B*52:01	HLA-C*02:10	371	376	376	34	33	33
HLA-A*02:06	HLA-B*52:01	HLA-C*03:02	544	549	549	60	59	59
HLA-A*02:06	HLA-B*52:01	HLA-C*03:03	444	449	449	45	44	44
HLA-A*02:06	HLA-B*52:01	HLA-C*03:04	444	449	449	45	44	44
HLA-A*02:06	HLA-B*52:01	HLA-C*04:01	363	368	368	34	33	33
HLA-A*02:06	HLA-B*52:01	HLA-C*05:01	384	389	388	35	34	34
HLA-A*02:06	HLA-B*52:01	HLA-C*06:02	369	374	374	35	34	34
HLA-A*02:06	HLA-B*52:01	HLA-C*07:01	365	370	370	34	33	33
HLA-A*02:06	HLA-B*52:01	HLA-C*07:02	374	379	379	34	33	33
HLA-A*02:06	HLA-B*52:01	HLA-C*08:01	364	369	369	34	33	33
HLA-A*02:06	HLA-B*52:01	HLA-C*08:02	377	382	381	35	34	34
HLA-A*02:06	HLA-B*52:01	HLA-C*12:02	390	395	395	36	35	35
HLA-A*02:06	HLA-B*52:01	HLA-C*12:03	447	451	453	46	45	46
HLA-A*02:06	HLA-B*52:01	HLA-C*14:02	555	558	563	49	48	50
HLA-A*02:06	HLA-B*52:01	HLA-C*15:02	378	383	383	35	34	34
HLA-A*02:06	HLA-B*52:01	HLA-C*16:01	499	504	504	53	52	52
HLA-A*02:06	HLA-B*52:01	HLA-C*17:01	370	375	375	34	33	33
HLA-A*02:06	HLA-B*53:01	HLA-C*01:02	409	414	413	47	46	45
HLA-A*02:06	HLA-B*53:01	HLA-C*02:02	412	417	417	45	44	44
HLA-A*02:06	HLA-B*53:01	HLA-C*02:10	412	417	417	45	44	44
HLA-A*02:06	HLA-B*53:01	HLA-C*03:02	583	588	588	70	69	69
HLA-A*02:06	HLA-B*53:01	HLA-C*03:03	484	489	489	55	54	54
HLA-A*02:06	HLA-B*53:01	HLA-C*03:04	484	489	489	55	54	54
HLA-A*02:06	HLA-B*53:01	HLA-C*04:01	404	409	409	45	44	44
HLA-A*02:06	HLA-B*53:01	HLA-C*05:01	425	430	429	46	45	45
HLA-A*02:06	HLA-B*53:01	HLA-C*06:02	410	415	415	46	45	45
HLA-A*02:06	HLA-B*53:01	HLA-C*07:01	406	411	411	45	44	44
HLA-A*02:06	HLA-B*53:01	HLA-C*07:02	415	420	420	45	44	44
HLA-A*02:06	HLA-B*53:01	HLA-C*08:01	405	410	410	45	44	44
HLA-A*02:06	HLA-B*53:01	HLA-C*08:02	418	423	422	46	45	45
HLA-A*02:06	HLA-B*53:01	HLA-C*12:02	430	435	435	46	45	45
HLA-A*02:06	HLA-B*53:01	HLA-C*12:03	487	491	493	56	55	56
HLA-A*02:06	HLA-B*53:01	HLA-C*14:02	596	599	604	60	59	61
HLA-A*02:06	HLA-B*53:01	HLA-C*15:02	419	424	424	46	45	45
HLA-A*02:06	HLA-B*53:01	HLA-C*16:01	539	544	544	63	62	62
HLA-A*02:06	HLA-B*53:01	HLA-C*17:01	411	416	416	45	44	44
HLA-A*02:06	HLA-B*57:01	HLA-C*01:02	430	435	435	42	41	41
HLA-A*02:06	HLA-B*57:01	HLA-C*02:02	433	438	439	40	39	40
HLA-A*02:06	HLA-B*57:01	HLA-C*02:10	433	438	439	40	39	40
HLA-A*02:06	HLA-B*57:01	HLA-C*03:02	602	607	607	66	65	65
HLA-A*02:06	HLA-B*57:01	HLA-C*03:03	505	510	511	51	50	51
HLA-A*02:06	HLA-B*57:01	HLA-C*03:04	505	510	511	51	50	51
HLA-A*02:06	HLA-B*57:01	HLA-C*04:01	425	430	431	40	39	40
HLA-A*02:06	HLA-B*57:01	HLA-C*05:01	446	451	451	41	40	41
HLA-A*02:06	HLA-B*57:01	HLA-C*06:02	431	436	437	41	40	41
HLA-A*02:06	HLA-B*57:01	HLA-C*07:01	427	432	433	40	39	40
HLA-A*02:06	HLA-B*57:01	HLA-C*07:02	436	441	442	40	39	40
HLA-A*02:06	HLA-B*57:01	HLA-C*08:01	426	431	432	40	39	40
HLA-A*02:06	HLA-B*57:01	HLA-C*08:02	439	444	444	41	40	41
HLA-A*02:06	HLA-B*57:01	HLA-C*12:02	451	456	457	42	41	42
HLA-A*02:06	HLA-B*57:01	HLA-C*12:03	508	512	514	52	51	52
HLA-A*02:06	HLA-B*57:01	HLA-C*14:02	617	620	626	55	54	57
HLA-A*02:06	HLA-B*57:01	HLA-C*15:02	440	445	446	41	40	41
HLA-A*02:06	HLA-B*57:01	HLA-C*16:01	559	564	564	59	58	58
HLA-A*02:06	HLA-B*57:01	HLA-C*17:01	432	437	438	40	39	40
HLA-A*02:06	HLA-B*58:01	HLA-C*01:02	515	520	522	50	49	50
HLA-A*02:06	HLA-B*58:01	HLA-C*02:02	517	522	525	48	47	49
HLA-A*02:06	HLA-B*58:01	HLA-C*02:10	517	522	525	48	47	49
HLA-A*02:06	HLA-B*58:01	HLA-C*03:02	680	685	687	71	70	71
HLA-A*02:06	HLA-B*58:01	HLA-C*03:03	586	591	594	56	55	57
HLA-A*02:06	HLA-B*58:01	HLA-C*03:04	586	591	594	56	55	57
HLA-A*02:06	HLA-B*58:01	HLA-C*04:01	510	515	518	48	47	49
HLA-A*02:06	HLA-B*58:01	HLA-C*05:01	531	536	538	49	48	50
HLA-A*02:06	HLA-B*58:01	HLA-C*06:02	516	521	524	49	48	50
HLA-A*02:06	HLA-B*58:01	HLA-C*07:01	512	517	520	48	47	49
HLA-A*02:06	HLA-B*58:01	HLA-C*07:02	521	526	529	48	47	49
HLA-A*02:06	HLA-B*58:01	HLA-C*08:01	511	516	519	48	47	49
HLA-A*02:06	HLA-B*58:01	HLA-C*08:02	524	529	531	49	48	50
HLA-A*02:06	HLA-B*58:01	HLA-C*12:02	533	538	541	48	47	49
HLA-A*02:06	HLA-B*58:01	HLA-C*12:03	587	591	595	57	56	58
HLA-A*02:06	HLA-B*58:01	HLA-C*14:02	701	704	712	63	62	66
HLA-A*02:06	HLA-B*58:01	HLA-C*15:02	523	528	531	49	48	50
HLA-A*02:06	HLA-B*58:01	HLA-C*16:01	636	641	643	64	63	64
HLA-A*02:06	HLA-B*58:01	HLA-C*17:01	516	521	524	48	47	49
HLA-A*02:06	HLA-B*58:02	HLA-C*01:02	368	373	372	36	35	34
HLA-A*02:06	HLA-B*58:02	HLA-C*02:02	371	376	376	34	33	33
HLA-A*02:06	HLA-B*58:02	HLA-C*02:10	371	376	376	34	33	33
HLA-A*02:06	HLA-B*58:02	HLA-C*03:02	544	549	549	60	59	59
HLA-A*02:06	HLA-B*58:02	HLA-C*03:03	444	449	449	45	44	44
HLA-A*02:06	HLA-B*58:02	HLA-C*03:04	444	449	449	45	44	44
HLA-A*02:06	HLA-B*58:02	HLA-C*04:01	363	368	368	34	33	33
HLA-A*02:06	HLA-B*58:02	HLA-C*05:01	384	389	388	35	34	34
HLA-A*02:06	HLA-B*58:02	HLA-C*06:02	369	374	374	35	34	34
HLA-A*02:06	HLA-B*58:02	HLA-C*07:01	365	370	370	34	33	33
HLA-A*02:06	HLA-B*58:02	HLA-C*07:02	374	379	379	34	33	33
HLA-A*02:06	HLA-B*58:02	HLA-C*08:01	364	369	369	34	33	33
HLA-A*02:06	HLA-B*58:02	HLA-C*08:02	377	382	381	35	34	34
HLA-A*02:06	HLA-B*58:02	HLA-C*12:02	390	395	395	36	35	35
HLA-A*02:06	HLA-B*58:02	HLA-C*12:03	447	451	453	46	45	46
HLA-A*02:06	HLA-B*58:02	HLA-C*14:02	555	558	563	49	48	50
HLA-A*02:06	HLA-B*58:02	HLA-C*15:02	378	383	383	35	34	34
HLA-A*02:06	HLA-B*58:02	HLA-C*16:01	499	504	504	53	52	52
HLA-A*02:06	HLA-B*58:02	HLA-C*17:01	370	375	375	34	33	33
HLA-A*02:11	HLA-B*07:02	HLA-C*01:02	1132	1146	1145	89	85	89
HLA-A*02:11	HLA-B*07:02	HLA-C*02:02	1135	1149	1149	87	83	88
HLA-A*02:11	HLA-B*07:02	HLA-C*02:10	1135	1149	1149	87	83	88
HLA-A*02:11	HLA-B*07:02	HLA-C*03:02	1305	1319	1319	113	109	114
HLA-A*02:11	HLA-B*07:02	HLA-C*03:03	1208	1222	1222	98	94	99
HLA-A*02:11	HLA-B*07:02	HLA-C*03:04	1208	1222	1222	98	94	99
HLA-A*02:11	HLA-B*07:02	HLA-C*04:01	1127	1141	1141	87	83	88
HLA-A*02:11	HLA-B*07:02	HLA-C*05:01	1146	1160	1160	88	84	89
HLA-A*02:11	HLA-B*07:02	HLA-C*06:02	1133	1147	1147	88	84	89
HLA-A*02:11	HLA-B*07:02	HLA-C*07:01	1129	1143	1143	87	83	88
HLA-A*02:11	HLA-B*07:02	HLA-C*07:02	1138	1152	1152	87	83	88
HLA-A*02:11	HLA-B*07:02	HLA-C*08:01	1128	1142	1142	87	83	88
HLA-A*02:11	HLA-B*07:02	HLA-C*08:02	1139	1153	1153	88	84	89
HLA-A*02:11	HLA-B*07:02	HLA-C*12:02	1154	1168	1168	89	85	90
HLA-A*02:11	HLA-B*07:02	HLA-C*12:03	1209	1222	1224	99	95	101
HLA-A*02:11	HLA-B*07:02	HLA-C*14:02	1315	1327	1332	102	98	105
HLA-A*02:11	HLA-B*07:02	HLA-C*15:02	1142	1156	1156	87	83	88
HLA-A*02:11	HLA-B*07:02	HLA-C*16:01	1262	1276	1276	106	102	107
HLA-A*02:11	HLA-B*07:02	HLA-C*17:01	1134	1148	1148	87	83	88
HLA-A*02:11	HLA-B*08:01	HLA-C*01:02	1108	1126	1124	84	85	88
HLA-A*02:11	HLA-B*08:01	HLA-C*02:02	1111	1129	1128	82	83	87
HLA-A*02:11	HLA-B*08:01	HLA-C*02:10	1111	1129	1128	82	83	87
HLA-A*02:11	HLA-B*08:01	HLA-C*03:02	1276	1294	1293	108	109	113
HLA-A*02:11	HLA-B*08:01	HLA-C*03:03	1181	1199	1198	93	94	98
HLA-A*02:11	HLA-B*08:01	HLA-C*03:04	1181	1199	1198	93	94	98
HLA-A*02:11	HLA-B*08:01	HLA-C*04:01	1103	1121	1120	82	83	87
HLA-A*02:11	HLA-B*08:01	HLA-C*05:01	1122	1140	1139	83	84	88
HLA-A*02:11	HLA-B*08:01	HLA-C*06:02	1109	1127	1126	83	84	88
HLA-A*02:11	HLA-B*08:01	HLA-C*07:01	1105	1123	1122	82	83	87
HLA-A*02:11	HLA-B*08:01	HLA-C*07:02	1114	1132	1131	82	83	87
HLA-A*02:11	HLA-B*08:01	HLA-C*08:01	1104	1122	1121	82	83	87
HLA-A*02:11	HLA-B*08:01	HLA-C*08:02	1115	1133	1132	83	84	88
HLA-A*02:11	HLA-B*08:01	HLA-C*12:02	1128	1146	1145	84	85	89
HLA-A*02:11	HLA-B*08:01	HLA-C*12:03	1181	1198	1199	94	95	100
HLA-A*02:11	HLA-B*08:01	HLA-C*14:02	1289	1305	1309	97	98	104
HLA-A*02:11	HLA-B*08:01	HLA-C*15:02	1117	1135	1134	82	83	87
HLA-A*02:11	HLA-B*08:01	HLA-C*16:01	1234	1252	1251	101	102	106
HLA-A*02:11	HLA-B*08:01	HLA-C*17:01	1110	1128	1127	82	83	87
HLA-A*02:11	HLA-B*14:02	HLA-C*01:02	1078	1094	1094	83	83	87
HLA-A*02:11	HLA-B*14:02	HLA-C*02:02	1081	1097	1098	81	81	86
HLA-A*02:11	HLA-B*14:02	HLA-C*02:10	1081	1097	1098	81	81	86
HLA-A*02:11	HLA-B*14:02	HLA-C*03:02	1252	1268	1269	107	107	112
HLA-A*02:11	HLA-B*14:02	HLA-C*03:03	1155	1171	1172	92	92	97
HLA-A*02:11	HLA-B*14:02	HLA-C*03:04	1155	1171	1172	92	92	97
HLA-A*02:11	HLA-B*14:02	HLA-C*04:01	1073	1089	1090	81	81	86
HLA-A*02:11	HLA-B*14:02	HLA-C*05:01	1092	1108	1109	82	82	87
HLA-A*02:11	HLA-B*14:02	HLA-C*06:02	1079	1095	1096	82	82	87
HLA-A*02:11	HLA-B*14:02	HLA-C*07:01	1075	1091	1092	81	81	86
HLA-A*02:11	HLA-B*14:02	HLA-C*07:02	1084	1100	1101	81	81	86
HLA-A*02:11	HLA-B*14:02	HLA-C*08:01	1074	1090	1091	81	81	86
HLA-A*02:11	HLA-B*14:02	HLA-C*08:02	1085	1101	1102	82	82	87
HLA-A*02:11	HLA-B*14:02	HLA-C*12:02	1100	1116	1117	83	83	88
HLA-A*02:11	HLA-B*14:02	HLA-C*12:03	1156	1171	1174	93	93	99
HLA-A*02:11	HLA-B*14:02	HLA-C*14:02	1261	1275	1281	96	96	103
HLA-A*02:11	HLA-B*14:02	HLA-C*15:02	1088	1104	1105	81	81	86
HLA-A*02:11	HLA-B*14:02	HLA-C*16:01	1209	1225	1226	100	100	105
HLA-A*02:11	HLA-B*14:02	HLA-C*17:01	1080	1096	1097	81	81	86
HLA-A*02:11	HLA-B*15:01	HLA-C*01:02	1240	1257	1256	98	98	100
HLA-A*02:11	HLA-B*15:01	HLA-C*02:02	1241	1258	1258	96	96	99
HLA-A*02:11	HLA-B*15:01	HLA-C*02:10	1241	1258	1258	96	96	99
HLA-A*02:11	HLA-B*15:01	HLA-C*03:02	1376	1393	1393	118	118	121
HLA-A*02:11	HLA-B*15:01	HLA-C*03:03	1312	1329	1329	107	107	110
HLA-A*02:11	HLA-B*15:01	HLA-C*03:04	1312	1329	1329	107	107	110
HLA-A*02:11	HLA-B*15:01	HLA-C*04:01	1235	1252	1252	96	96	99
HLA-A*02:11	HLA-B*15:01	HLA-C*05:01	1254	1271	1271	97	97	100
HLA-A*02:11	HLA-B*15:01	HLA-C*06:02	1241	1258	1258	97	97	100
HLA-A*02:11	HLA-B*15:01	HLA-C*07:01	1237	1254	1254	96	96	99
HLA-A*02:11	HLA-B*15:01	HLA-C*07:02	1246	1263	1263	96	96	99
HLA-A*02:11	HLA-B*15:01	HLA-C*08:01	1236	1253	1253	96	96	99
HLA-A*02:11	HLA-B*15:01	HLA-C*08:02	1247	1264	1264	97	97	100
HLA-A*02:11	HLA-B*15:01	HLA-C*12:02	1259	1276	1276	98	98	101
HLA-A*02:11	HLA-B*15:01	HLA-C*12:03	1313	1329	1331	108	108	112
HLA-A*02:11	HLA-B*15:01	HLA-C*14:02	1418	1433	1438	111	111	116
HLA-A*02:11	HLA-B*15:01	HLA-C*15:02	1250	1267	1267	96	96	99
HLA-A*02:11	HLA-B*15:01	HLA-C*16:01	1359	1376	1376	113	113	116
HLA-A*02:11	HLA-B*15:01	HLA-C*17:01	1242	1259	1259	96	96	99
HLA-A*02:11	HLA-B*15:03	HLA-C*01:02	1526	1543	1546	140	140	148
HLA-A*02:11	HLA-B*15:03	HLA-C*02:02	1523	1540	1544	138	138	147
HLA-A*02:11	HLA-B*15:03	HLA-C*02:10	1523	1540	1544	138	138	147
HLA-A*02:11	HLA-B*15:03	HLA-C*03:02	1605	1622	1626	148	148	157
HLA-A*02:11	HLA-B*15:03	HLA-C*03:03	1586	1603	1607	146	146	155
HLA-A*02:11	HLA-B*15:03	HLA-C*03:04	1586	1603	1607	146	146	155
HLA-A*02:11	HLA-B*15:03	HLA-C*04:01	1521	1538	1542	138	138	147
HLA-A*02:11	HLA-B*15:03	HLA-C*05:01	1540	1557	1561	139	139	148
HLA-A*02:11	HLA-B*15:03	HLA-C*06:02	1527	1544	1548	139	139	148
HLA-A*02:11	HLA-B*15:03	HLA-C*07:01	1523	1540	1544	138	138	147
HLA-A*02:11	HLA-B*15:03	HLA-C*07:02	1531	1548	1552	138	138	147
HLA-A*02:11	HLA-B*15:03	HLA-C*08:01	1522	1539	1543	138	138	147
HLA-A*02:11	HLA-B*15:03	HLA-C*08:02	1533	1550	1554	139	139	148
HLA-A*02:11	HLA-B*15:03	HLA-C*12:02	1531	1548	1552	138	138	147
HLA-A*02:11	HLA-B*15:03	HLA-C*12:03	1575	1591	1596	143	143	152
HLA-A*02:11	HLA-B*15:03	HLA-C*14:02	1695	1710	1719	153	153	164
HLA-A*02:11	HLA-B*15:03	HLA-C*15:02	1534	1551	1555	138	138	147
HLA-A*02:11	HLA-B*15:03	HLA-C*16:01	1606	1623	1626	147	147	155
HLA-A*02:11	HLA-B*15:03	HLA-C*17:01	1527	1544	1548	138	138	147
HLA-A*02:11	HLA-B*18:01	HLA-C*01:02	1109	1125	1127	87	87	92
HLA-A*02:11	HLA-B*18:01	HLA-C*02:02	1112	1128	1131	85	85	91
HLA-A*02:11	HLA-B*18:01	HLA-C*02:10	1112	1128	1131	85	85	91
HLA-A*02:11	HLA-B*18:01	HLA-C*03:02	1283	1299	1302	111	111	117
HLA-A*02:11	HLA-B*18:01	HLA-C*03:03	1186	1202	1205	96	96	102
HLA-A*02:11	HLA-B*18:01	HLA-C*03:04	1186	1202	1205	96	96	102
HLA-A*02:11	HLA-B*18:01	HLA-C*04:01	1104	1120	1123	85	85	91
HLA-A*02:11	HLA-B*18:01	HLA-C*05:01	1123	1139	1142	86	86	92
HLA-A*02:11	HLA-B*18:01	HLA-C*06:02	1110	1126	1129	86	86	92
HLA-A*02:11	HLA-B*18:01	HLA-C*07:01	1106	1122	1125	85	85	91
HLA-A*02:11	HLA-B*18:01	HLA-C*07:02	1115	1131	1134	85	85	91
HLA-A*02:11	HLA-B*18:01	HLA-C*08:01	1105	1121	1124	85	85	91
HLA-A*02:11	HLA-B*18:01	HLA-C*08:02	1116	1132	1135	86	86	92
HLA-A*02:11	HLA-B*18:01	HLA-C*12:02	1131	1147	1150	87	87	93
HLA-A*02:11	HLA-B*18:01	HLA-C*12:03	1187	1202	1207	97	97	104
HLA-A*02:11	HLA-B*18:01	HLA-C*14:02	1292	1306	1314	100	100	108
HLA-A*02:11	HLA-B*18:01	HLA-C*15:02	1119	1135	1138	85	85	91
HLA-A*02:11	HLA-B*18:01	HLA-C*16:01	1240	1256	1259	104	104	110
HLA-A*02:11	HLA-B*18:01	HLA-C*17:01	1111	1127	1130	85	85	91
HLA-A*02:11	HLA-B*27:05	HLA-C*01:02	1118	1137	1134	88	91	92
HLA-A*02:11	HLA-B*27:05	HLA-C*02:02	1121	1140	1138	86	89	91
HLA-A*02:11	HLA-B*27:05	HLA-C*02:10	1121	1140	1138	86	89	91
HLA-A*02:11	HLA-B*27:05	HLA-C*03:02	1292	1311	1309	112	115	117
HLA-A*02:11	HLA-B*27:05	HLA-C*03:03	1195	1214	1212	97	100	102
HLA-A*02:11	HLA-B*27:05	HLA-C*03:04	1195	1214	1212	97	100	102
HLA-A*02:11	HLA-B*27:05	HLA-C*04:01	1113	1132	1130	86	89	91
HLA-A*02:11	HLA-B*27:05	HLA-C*05:01	1132	1151	1149	87	90	92
HLA-A*02:11	HLA-B*27:05	HLA-C*06:02	1118	1137	1135	87	90	92
HLA-A*02:11	HLA-B*27:05	HLA-C*07:01	1114	1133	1131	86	89	91
HLA-A*02:11	HLA-B*27:05	HLA-C*07:02	1123	1142	1140	86	89	91
HLA-A*02:11	HLA-B*27:05	HLA-C*08:01	1114	1133	1131	86	89	91
HLA-A*02:11	HLA-B*27:05	HLA-C*08:02	1125	1144	1142	87	90	92
HLA-A*02:11	HLA-B*27:05	HLA-C*12:02	1140	1159	1157	88	91	93
HLA-A*02:11	HLA-B*27:05	HLA-C*12:03	1196	1214	1214	98	101	104
HLA-A*02:11	HLA-B*27:05	HLA-C*14:02	1300	1317	1320	101	104	108
HLA-A*02:11	HLA-B*27:05	HLA-C*15:02	1128	1147	1145	86	89	91
HLA-A*02:11	HLA-B*27:05	HLA-C*16:01	1249	1268	1266	105	108	110
HLA-A*02:11	HLA-B*27:05	HLA-C*17:01	1120	1139	1137	86	89	91
HLA-A*02:11	HLA-B*35:01	HLA-C*01:02	1183	1201	1201	103	103	108
HLA-A*02:11	HLA-B*35:01	HLA-C*02:02	1179	1197	1198	101	101	107
HLA-A*02:11	HLA-B*35:01	HLA-C*02:10	1179	1197	1198	101	101	107
HLA-A*02:11	HLA-B*35:01	HLA-C*03:02	1311	1329	1330	119	119	125
HLA-A*02:11	HLA-B*35:01	HLA-C*03:03	1249	1267	1268	110	110	116
HLA-A*02:11	HLA-B*35:01	HLA-C*03:04	1249	1267	1268	110	110	116
HLA-A*02:11	HLA-B*35:01	HLA-C*04:01	1178	1196	1197	101	101	107
HLA-A*02:11	HLA-B*35:01	HLA-C*05:01	1196	1214	1215	102	102	108
HLA-A*02:11	HLA-B*35:01	HLA-C*06:02	1184	1202	1203	102	102	108
HLA-A*02:11	HLA-B*35:01	HLA-C*07:01	1180	1198	1199	101	101	107
HLA-A*02:11	HLA-B*35:01	HLA-C*07:02	1189	1207	1208	101	101	107
HLA-A*02:11	HLA-B*35:01	HLA-C*08:01	1178	1196	1197	101	101	107
HLA-A*02:11	HLA-B*35:01	HLA-C*08:02	1189	1207	1208	102	102	108
HLA-A*02:11	HLA-B*35:01	HLA-C*12:02	1191	1209	1210	101	101	107
HLA-A*02:11	HLA-B*35:01	HLA-C*12:03	1243	1260	1263	108	108	115
HLA-A*02:11	HLA-B*35:01	HLA-C*14:02	1362	1378	1384	116	116	124
HLA-A*02:11	HLA-B*35:01	HLA-C*15:02	1193	1211	1212	101	101	107
HLA-A*02:11	HLA-B*35:01	HLA-C*16:01	1288	1306	1307	115	115	121
HLA-A*02:11	HLA-B*35:01	HLA-C*17:01	1184	1202	1203	101	101	107
HLA-A*02:11	HLA-B*35:03	HLA-C*01:02	1079	1096	1096	83	83	87
HLA-A*02:11	HLA-B*35:03	HLA-C*02:02	1082	1099	1100	81	81	86
HLA-A*02:11	HLA-B*35:03	HLA-C*02:10	1082	1099	1100	81	81	86
HLA-A*02:11	HLA-B*35:03	HLA-C*03:02	1253	1270	1271	107	107	112
HLA-A*02:11	HLA-B*35:03	HLA-C*03:03	1156	1173	1174	92	92	97
HLA-A*02:11	HLA-B*35:03	HLA-C*03:04	1156	1173	1174	92	92	97
HLA-A*02:11	HLA-B*35:03	HLA-C*04:01	1074	1091	1092	81	81	86
HLA-A*02:11	HLA-B*35:03	HLA-C*05:01	1093	1110	1111	82	82	87
HLA-A*02:11	HLA-B*35:03	HLA-C*06:02	1080	1097	1098	82	82	87
HLA-A*02:11	HLA-B*35:03	HLA-C*07:01	1076	1093	1094	81	81	86
HLA-A*02:11	HLA-B*35:03	HLA-C*07:02	1085	1102	1103	81	81	86
HLA-A*02:11	HLA-B*35:03	HLA-C*08:01	1075	1092	1093	81	81	86
HLA-A*02:11	HLA-B*35:03	HLA-C*08:02	1086	1103	1104	82	82	87
HLA-A*02:11	HLA-B*35:03	HLA-C*12:02	1101	1118	1119	83	83	88
HLA-A*02:11	HLA-B*35:03	HLA-C*12:03	1157	1173	1176	93	93	99
HLA-A*02:11	HLA-B*35:03	HLA-C*14:02	1262	1277	1283	96	96	103
HLA-A*02:11	HLA-B*35:03	HLA-C*15:02	1089	1106	1107	81	81	86
HLA-A*02:11	HLA-B*35:03	HLA-C*16:01	1210	1227	1228	100	100	105
HLA-A*02:11	HLA-B*35:03	HLA-C*17:01	1081	1098	1099	81	81	86
HLA-A*02:11	HLA-B*38:01	HLA-C*01:02	1079	1095	1095	83	83	87
HLA-A*02:11	HLA-B*38:01	HLA-C*02:02	1082	1098	1099	81	81	86
HLA-A*02:11	HLA-B*38:01	HLA-C*02:10	1082	1098	1099	81	81	86
HLA-A*02:11	HLA-B*38:01	HLA-C*03:02	1253	1269	1270	107	107	112
[truncated: 7,577 more rows]
