# Supplementary material for: Alterations in SARS-CoV-2 Omicron and Delta peptides presentation by HLA molecules
Source: PeerJ. 2022 Apr 27;10:e13354. doi: 10.7717/peerj.13354 (PMC9055995; doi:10.7717/peerj.13354)
Supplement: Supplemental Information 4 — The number of tightly binding peptides (affinity less or equal to 50 nM) was calculated for each out of 38400 HLA class II haplotypes from the theoretical library. [file peerj-10-13354-s004.xlsx]

## Sheet: Table S4
HLA-DR	HLA-DP	HLA-DQ	Wuhan, whole virus	Delta, whole virus	Omicron, whole virus	Wuhan, spike	Delta, spike	Omicron, spike
HLA-DRB1*01:01	HLA-DPA1*01:03/DPB1*02:01	HLA-DQA1*01:01/DQB1*02:01	5813	5801	5856	759	759	769
HLA-DRB1*01:01	HLA-DPA1*01:03/DPB1*02:01	HLA-DQA1*01:01/DQB1*05:01	5813	5801	5856	759	759	769
HLA-DRB1*01:01	HLA-DPA1*01:03/DPB1*02:01	HLA-DQA1*01:01/DQB1*05:02	5813	5801	5856	759	759	769
HLA-DRB1*01:01	HLA-DPA1*01:03/DPB1*02:01	HLA-DQA1*01:01/DQB1*05:03	5813	5801	5856	759	759	769
HLA-DRB1*01:01	HLA-DPA1*01:03/DPB1*02:01	HLA-DQA1*01:01/DQB1*06:01	5813	5801	5856	759	759	769
HLA-DRB1*01:01	HLA-DPA1*01:03/DPB1*02:01	HLA-DQA1*01:01/DQB1*06:02	5813	5801	5856	759	759	769
HLA-DRB1*01:01	HLA-DPA1*01:03/DPB1*02:01	HLA-DQA1*01:01/DQB1*06:04	5813	5801	5856	759	759	769
HLA-DRB1*01:01	HLA-DPA1*01:03/DPB1*02:01	HLA-DQA1*01:02/DQB1*02:01	5813	5801	5856	759	759	769
HLA-DRB1*01:01	HLA-DPA1*01:03/DPB1*02:01	HLA-DQA1*01:02/DQB1*05:01	6895	6884	6939	833	833	842
HLA-DRB1*01:01	HLA-DPA1*01:03/DPB1*02:01	HLA-DQA1*01:02/DQB1*05:02	5813	5801	5856	759	759	769
HLA-DRB1*01:01	HLA-DPA1*01:03/DPB1*02:01	HLA-DQA1*01:02/DQB1*05:03	5823	5811	5866	759	759	769
HLA-DRB1*01:01	HLA-DPA1*01:03/DPB1*02:01	HLA-DQA1*01:02/DQB1*06:01	5846	5834	5889	789	789	799
HLA-DRB1*01:01	HLA-DPA1*01:03/DPB1*02:01	HLA-DQA1*01:02/DQB1*06:02	5982	5971	6026	789	790	800
HLA-DRB1*01:01	HLA-DPA1*01:03/DPB1*02:01	HLA-DQA1*01:02/DQB1*06:03	5813	5801	5856	759	759	769
HLA-DRB1*01:01	HLA-DPA1*01:03/DPB1*02:01	HLA-DQA1*01:02/DQB1*06:04	5813	5801	5856	759	759	769
HLA-DRB1*01:01	HLA-DPA1*01:03/DPB1*02:01	HLA-DQA1*01:02/DQB1*06:09	5813	5801	5856	759	759	769
HLA-DRB1*01:01	HLA-DPA1*01:03/DPB1*02:01	HLA-DQA1*01:03/DQB1*03:03	5813	5801	5856	759	759	769
HLA-DRB1*01:01	HLA-DPA1*01:03/DPB1*02:01	HLA-DQA1*01:03/DQB1*05:02	5813	5801	5856	759	759	769
HLA-DRB1*01:01	HLA-DPA1*01:03/DPB1*02:01	HLA-DQA1*01:03/DQB1*05:03	5813	5801	5856	759	759	769
HLA-DRB1*01:01	HLA-DPA1*01:03/DPB1*02:01	HLA-DQA1*01:03/DQB1*06:01	5846	5834	5889	791	791	801
HLA-DRB1*01:01	HLA-DPA1*01:03/DPB1*02:01	HLA-DQA1*01:03/DQB1*06:02	5853	5841	5896	788	788	798
HLA-DRB1*01:01	HLA-DPA1*01:03/DPB1*02:01	HLA-DQA1*01:03/DQB1*06:03	5813	5801	5856	759	759	769
HLA-DRB1*01:01	HLA-DPA1*01:03/DPB1*02:01	HLA-DQA1*01:03/DQB1*06:09	5813	5801	5856	759	759	769
HLA-DRB1*01:01	HLA-DPA1*01:03/DPB1*02:01	HLA-DQA1*02:01/DQB1*02:01	5813	5801	5856	759	759	769
HLA-DRB1*01:01	HLA-DPA1*01:03/DPB1*02:01	HLA-DQA1*02:01/DQB1*02:02	5813	5801	5856	759	759	769
HLA-DRB1*01:01	HLA-DPA1*01:03/DPB1*02:01	HLA-DQA1*02:01/DQB1*03:03	5815	5803	5858	761	761	771
HLA-DRB1*01:01	HLA-DPA1*01:03/DPB1*02:01	HLA-DQA1*02:01/DQB1*04:02	5813	5801	5856	759	759	769
HLA-DRB1*01:01	HLA-DPA1*01:03/DPB1*02:01	HLA-DQA1*02:01/DQB1*06:04	5813	5801	5856	759	759	769
HLA-DRB1*01:01	HLA-DPA1*01:03/DPB1*02:01	HLA-DQA1*03:01/DQB1*03:02	5813	5801	5856	759	759	769
HLA-DRB1*01:01	HLA-DPA1*01:03/DPB1*02:01	HLA-DQA1*03:01/DQB1*06:01	5813	5801	5856	759	759	769
HLA-DRB1*01:01	HLA-DPA1*01:03/DPB1*02:01	HLA-DQA1*04:01/DQB1*02:01	5813	5801	5856	759	759	769
HLA-DRB1*01:01	HLA-DPA1*01:03/DPB1*02:01	HLA-DQA1*04:01/DQB1*03:01	5819	5807	5862	759	759	769
HLA-DRB1*01:01	HLA-DPA1*01:03/DPB1*02:01	HLA-DQA1*04:01/DQB1*03:02	5813	5801	5856	759	759	769
HLA-DRB1*01:01	HLA-DPA1*01:03/DPB1*02:01	HLA-DQA1*04:01/DQB1*03:03	5813	5801	5856	759	759	769
HLA-DRB1*01:01	HLA-DPA1*01:03/DPB1*02:01	HLA-DQA1*04:01/DQB1*04:02	5813	5801	5856	759	759	769
HLA-DRB1*01:01	HLA-DPA1*01:03/DPB1*02:01	HLA-DQA1*05:01/DQB1*02:01	5813	5801	5856	759	759	769
HLA-DRB1*01:01	HLA-DPA1*01:03/DPB1*02:01	HLA-DQA1*05:01/DQB1*03:01	6123	6111	6166	866	866	876
HLA-DRB1*01:01	HLA-DPA1*01:03/DPB1*02:01	HLA-DQA1*05:01/DQB1*03:02	5813	5801	5856	759	759	769
HLA-DRB1*01:01	HLA-DPA1*01:03/DPB1*02:01	HLA-DQA1*05:01/DQB1*06:01	5813	5801	5856	759	759	769
HLA-DRB1*01:01	HLA-DPA1*01:03/DPB1*02:01	HLA-DQA1*05:01/DQB1*06:02	5813	5801	5856	759	759	769
HLA-DRB1*01:01	HLA-DPA1*01:03/DPB1*02:01	HLA-DQA1*05:01/DQB1*06:03	5813	5801	5856	759	759	769
HLA-DRB1*01:01	HLA-DPA1*01:03/DPB1*02:01	HLA-DQA1*05:01/DQB1*06:04	5813	5801	5856	759	759	769
HLA-DRB1*01:01	HLA-DPA1*01:03/DPB1*02:01	HLA-DQA1*06:01/DQB1*02:01	5813	5801	5856	759	759	769
HLA-DRB1*01:01	HLA-DPA1*01:03/DPB1*02:01	HLA-DQA1*06:01/DQB1*03:01	5895	5883	5938	782	782	792
HLA-DRB1*01:01	HLA-DPA1*01:03/DPB1*02:01	HLA-DQA1*06:01/DQB1*03:03	5813	5801	5856	759	759	769
HLA-DRB1*01:01	HLA-DPA1*01:03/DPB1*02:01	HLA-DQA1*06:01/DQB1*04:02	5813	5801	5856	759	759	769
HLA-DRB1*01:01	HLA-DPA1*01:03/DPB1*02:01	HLA-DQA1*06:01/DQB1*06:01	5813	5801	5856	759	759	769
HLA-DRB1*01:01	HLA-DPA1*01:03/DPB1*02:01	HLA-DQA1*06:01/DQB1*06:03	5813	5801	5856	759	759	769
HLA-DRB1*01:01	HLA-DPA1*01:03/DPB1*03:01	HLA-DQA1*01:01/DQB1*02:01	4936	4933	4987	589	591	600
HLA-DRB1*01:01	HLA-DPA1*01:03/DPB1*03:01	HLA-DQA1*01:01/DQB1*05:01	4936	4933	4987	589	591	600
HLA-DRB1*01:01	HLA-DPA1*01:03/DPB1*03:01	HLA-DQA1*01:01/DQB1*05:02	4936	4933	4987	589	591	600
HLA-DRB1*01:01	HLA-DPA1*01:03/DPB1*03:01	HLA-DQA1*01:01/DQB1*05:03	4936	4933	4987	589	591	600
HLA-DRB1*01:01	HLA-DPA1*01:03/DPB1*03:01	HLA-DQA1*01:01/DQB1*06:01	4936	4933	4987	589	591	600
HLA-DRB1*01:01	HLA-DPA1*01:03/DPB1*03:01	HLA-DQA1*01:01/DQB1*06:02	4936	4933	4987	589	591	600
HLA-DRB1*01:01	HLA-DPA1*01:03/DPB1*03:01	HLA-DQA1*01:01/DQB1*06:04	4936	4933	4987	589	591	600
HLA-DRB1*01:01	HLA-DPA1*01:03/DPB1*03:01	HLA-DQA1*01:02/DQB1*02:01	4936	4933	4987	589	591	600
HLA-DRB1*01:01	HLA-DPA1*01:03/DPB1*03:01	HLA-DQA1*01:02/DQB1*05:01	6091	6089	6143	668	670	678
HLA-DRB1*01:01	HLA-DPA1*01:03/DPB1*03:01	HLA-DQA1*01:02/DQB1*05:02	4936	4933	4987	589	591	600
HLA-DRB1*01:01	HLA-DPA1*01:03/DPB1*03:01	HLA-DQA1*01:02/DQB1*05:03	4946	4943	4997	589	591	600
HLA-DRB1*01:01	HLA-DPA1*01:03/DPB1*03:01	HLA-DQA1*01:02/DQB1*06:01	4969	4966	5020	619	621	630
HLA-DRB1*01:01	HLA-DPA1*01:03/DPB1*03:01	HLA-DQA1*01:02/DQB1*06:02	5105	5103	5157	619	622	631
HLA-DRB1*01:01	HLA-DPA1*01:03/DPB1*03:01	HLA-DQA1*01:02/DQB1*06:03	4936	4933	4987	589	591	600
HLA-DRB1*01:01	HLA-DPA1*01:03/DPB1*03:01	HLA-DQA1*01:02/DQB1*06:04	4936	4933	4987	589	591	600
HLA-DRB1*01:01	HLA-DPA1*01:03/DPB1*03:01	HLA-DQA1*01:02/DQB1*06:09	4936	4933	4987	589	591	600
HLA-DRB1*01:01	HLA-DPA1*01:03/DPB1*03:01	HLA-DQA1*01:03/DQB1*03:03	4936	4933	4987	589	591	600
HLA-DRB1*01:01	HLA-DPA1*01:03/DPB1*03:01	HLA-DQA1*01:03/DQB1*05:02	4936	4933	4987	589	591	600
HLA-DRB1*01:01	HLA-DPA1*01:03/DPB1*03:01	HLA-DQA1*01:03/DQB1*05:03	4936	4933	4987	589	591	600
HLA-DRB1*01:01	HLA-DPA1*01:03/DPB1*03:01	HLA-DQA1*01:03/DQB1*06:01	4969	4966	5020	621	623	632
HLA-DRB1*01:01	HLA-DPA1*01:03/DPB1*03:01	HLA-DQA1*01:03/DQB1*06:02	4976	4973	5027	618	620	629
HLA-DRB1*01:01	HLA-DPA1*01:03/DPB1*03:01	HLA-DQA1*01:03/DQB1*06:03	4936	4933	4987	589	591	600
HLA-DRB1*01:01	HLA-DPA1*01:03/DPB1*03:01	HLA-DQA1*01:03/DQB1*06:09	4936	4933	4987	589	591	600
HLA-DRB1*01:01	HLA-DPA1*01:03/DPB1*03:01	HLA-DQA1*02:01/DQB1*02:01	4936	4933	4987	589	591	600
HLA-DRB1*01:01	HLA-DPA1*01:03/DPB1*03:01	HLA-DQA1*02:01/DQB1*02:02	4936	4933	4987	589	591	600
HLA-DRB1*01:01	HLA-DPA1*01:03/DPB1*03:01	HLA-DQA1*02:01/DQB1*03:03	4938	4935	4989	591	593	602
HLA-DRB1*01:01	HLA-DPA1*01:03/DPB1*03:01	HLA-DQA1*02:01/DQB1*04:02	4936	4933	4987	589	591	600
HLA-DRB1*01:01	HLA-DPA1*01:03/DPB1*03:01	HLA-DQA1*02:01/DQB1*06:04	4936	4933	4987	589	591	600
HLA-DRB1*01:01	HLA-DPA1*01:03/DPB1*03:01	HLA-DQA1*03:01/DQB1*03:02	4936	4933	4987	589	591	600
HLA-DRB1*01:01	HLA-DPA1*01:03/DPB1*03:01	HLA-DQA1*03:01/DQB1*06:01	4936	4933	4987	589	591	600
HLA-DRB1*01:01	HLA-DPA1*01:03/DPB1*03:01	HLA-DQA1*04:01/DQB1*02:01	4936	4933	4987	589	591	600
HLA-DRB1*01:01	HLA-DPA1*01:03/DPB1*03:01	HLA-DQA1*04:01/DQB1*03:01	4942	4939	4993	589	591	600
HLA-DRB1*01:01	HLA-DPA1*01:03/DPB1*03:01	HLA-DQA1*04:01/DQB1*03:02	4936	4933	4987	589	591	600
HLA-DRB1*01:01	HLA-DPA1*01:03/DPB1*03:01	HLA-DQA1*04:01/DQB1*03:03	4936	4933	4987	589	591	600
HLA-DRB1*01:01	HLA-DPA1*01:03/DPB1*03:01	HLA-DQA1*04:01/DQB1*04:02	4936	4933	4987	589	591	600
HLA-DRB1*01:01	HLA-DPA1*01:03/DPB1*03:01	HLA-DQA1*05:01/DQB1*02:01	4936	4933	4987	589	591	600
HLA-DRB1*01:01	HLA-DPA1*01:03/DPB1*03:01	HLA-DQA1*05:01/DQB1*03:01	5246	5243	5297	696	698	707
HLA-DRB1*01:01	HLA-DPA1*01:03/DPB1*03:01	HLA-DQA1*05:01/DQB1*03:02	4936	4933	4987	589	591	600
HLA-DRB1*01:01	HLA-DPA1*01:03/DPB1*03:01	HLA-DQA1*05:01/DQB1*06:01	4936	4933	4987	589	591	600
HLA-DRB1*01:01	HLA-DPA1*01:03/DPB1*03:01	HLA-DQA1*05:01/DQB1*06:02	4936	4933	4987	589	591	600
HLA-DRB1*01:01	HLA-DPA1*01:03/DPB1*03:01	HLA-DQA1*05:01/DQB1*06:03	4936	4933	4987	589	591	600
HLA-DRB1*01:01	HLA-DPA1*01:03/DPB1*03:01	HLA-DQA1*05:01/DQB1*06:04	4936	4933	4987	589	591	600
HLA-DRB1*01:01	HLA-DPA1*01:03/DPB1*03:01	HLA-DQA1*06:01/DQB1*02:01	4936	4933	4987	589	591	600
HLA-DRB1*01:01	HLA-DPA1*01:03/DPB1*03:01	HLA-DQA1*06:01/DQB1*03:01	5018	5015	5069	612	614	623
HLA-DRB1*01:01	HLA-DPA1*01:03/DPB1*03:01	HLA-DQA1*06:01/DQB1*03:03	4936	4933	4987	589	591	600
HLA-DRB1*01:01	HLA-DPA1*01:03/DPB1*03:01	HLA-DQA1*06:01/DQB1*04:02	4936	4933	4987	589	591	600
HLA-DRB1*01:01	HLA-DPA1*01:03/DPB1*03:01	HLA-DQA1*06:01/DQB1*06:01	4936	4933	4987	589	591	600
HLA-DRB1*01:01	HLA-DPA1*01:03/DPB1*03:01	HLA-DQA1*06:01/DQB1*06:03	4936	4933	4987	589	591	600
HLA-DRB1*01:01	HLA-DPA1*01:03/DPB1*04:01	HLA-DQA1*01:01/DQB1*02:01	5620	5615	5672	709	709	721
HLA-DRB1*01:01	HLA-DPA1*01:03/DPB1*04:01	HLA-DQA1*01:01/DQB1*05:01	5620	5615	5672	709	709	721
HLA-DRB1*01:01	HLA-DPA1*01:03/DPB1*04:01	HLA-DQA1*01:01/DQB1*05:02	5620	5615	5672	709	709	721
HLA-DRB1*01:01	HLA-DPA1*01:03/DPB1*04:01	HLA-DQA1*01:01/DQB1*05:03	5620	5615	5672	709	709	721
HLA-DRB1*01:01	HLA-DPA1*01:03/DPB1*04:01	HLA-DQA1*01:01/DQB1*06:01	5620	5615	5672	709	709	721
HLA-DRB1*01:01	HLA-DPA1*01:03/DPB1*04:01	HLA-DQA1*01:01/DQB1*06:02	5620	5615	5672	709	709	721
HLA-DRB1*01:01	HLA-DPA1*01:03/DPB1*04:01	HLA-DQA1*01:01/DQB1*06:04	5620	5615	5672	709	709	721
HLA-DRB1*01:01	HLA-DPA1*01:03/DPB1*04:01	HLA-DQA1*01:02/DQB1*02:01	5620	5615	5672	709	709	721
HLA-DRB1*01:01	HLA-DPA1*01:03/DPB1*04:01	HLA-DQA1*01:02/DQB1*05:01	6708	6704	6761	788	788	799
HLA-DRB1*01:01	HLA-DPA1*01:03/DPB1*04:01	HLA-DQA1*01:02/DQB1*05:02	5620	5615	5672	709	709	721
HLA-DRB1*01:01	HLA-DPA1*01:03/DPB1*04:01	HLA-DQA1*01:02/DQB1*05:03	5630	5625	5682	709	709	721
HLA-DRB1*01:01	HLA-DPA1*01:03/DPB1*04:01	HLA-DQA1*01:02/DQB1*06:01	5653	5648	5705	739	739	751
HLA-DRB1*01:01	HLA-DPA1*01:03/DPB1*04:01	HLA-DQA1*01:02/DQB1*06:02	5789	5785	5842	739	740	752
HLA-DRB1*01:01	HLA-DPA1*01:03/DPB1*04:01	HLA-DQA1*01:02/DQB1*06:03	5620	5615	5672	709	709	721
HLA-DRB1*01:01	HLA-DPA1*01:03/DPB1*04:01	HLA-DQA1*01:02/DQB1*06:04	5620	5615	5672	709	709	721
HLA-DRB1*01:01	HLA-DPA1*01:03/DPB1*04:01	HLA-DQA1*01:02/DQB1*06:09	5620	5615	5672	709	709	721
HLA-DRB1*01:01	HLA-DPA1*01:03/DPB1*04:01	HLA-DQA1*01:03/DQB1*03:03	5620	5615	5672	709	709	721
HLA-DRB1*01:01	HLA-DPA1*01:03/DPB1*04:01	HLA-DQA1*01:03/DQB1*05:02	5620	5615	5672	709	709	721
HLA-DRB1*01:01	HLA-DPA1*01:03/DPB1*04:01	HLA-DQA1*01:03/DQB1*05:03	5620	5615	5672	709	709	721
HLA-DRB1*01:01	HLA-DPA1*01:03/DPB1*04:01	HLA-DQA1*01:03/DQB1*06:01	5653	5648	5705	741	741	753
HLA-DRB1*01:01	HLA-DPA1*01:03/DPB1*04:01	HLA-DQA1*01:03/DQB1*06:02	5660	5655	5712	738	738	750
HLA-DRB1*01:01	HLA-DPA1*01:03/DPB1*04:01	HLA-DQA1*01:03/DQB1*06:03	5620	5615	5672	709	709	721
HLA-DRB1*01:01	HLA-DPA1*01:03/DPB1*04:01	HLA-DQA1*01:03/DQB1*06:09	5620	5615	5672	709	709	721
HLA-DRB1*01:01	HLA-DPA1*01:03/DPB1*04:01	HLA-DQA1*02:01/DQB1*02:01	5620	5615	5672	709	709	721
HLA-DRB1*01:01	HLA-DPA1*01:03/DPB1*04:01	HLA-DQA1*02:01/DQB1*02:02	5620	5615	5672	709	709	721
HLA-DRB1*01:01	HLA-DPA1*01:03/DPB1*04:01	HLA-DQA1*02:01/DQB1*03:03	5622	5617	5674	711	711	723
HLA-DRB1*01:01	HLA-DPA1*01:03/DPB1*04:01	HLA-DQA1*02:01/DQB1*04:02	5620	5615	5672	709	709	721
HLA-DRB1*01:01	HLA-DPA1*01:03/DPB1*04:01	HLA-DQA1*02:01/DQB1*06:04	5620	5615	5672	709	709	721
HLA-DRB1*01:01	HLA-DPA1*01:03/DPB1*04:01	HLA-DQA1*03:01/DQB1*03:02	5620	5615	5672	709	709	721
HLA-DRB1*01:01	HLA-DPA1*01:03/DPB1*04:01	HLA-DQA1*03:01/DQB1*06:01	5620	5615	5672	709	709	721
HLA-DRB1*01:01	HLA-DPA1*01:03/DPB1*04:01	HLA-DQA1*04:01/DQB1*02:01	5620	5615	5672	709	709	721
HLA-DRB1*01:01	HLA-DPA1*01:03/DPB1*04:01	HLA-DQA1*04:01/DQB1*03:01	5626	5621	5678	709	709	721
HLA-DRB1*01:01	HLA-DPA1*01:03/DPB1*04:01	HLA-DQA1*04:01/DQB1*03:02	5620	5615	5672	709	709	721
HLA-DRB1*01:01	HLA-DPA1*01:03/DPB1*04:01	HLA-DQA1*04:01/DQB1*03:03	5620	5615	5672	709	709	721
HLA-DRB1*01:01	HLA-DPA1*01:03/DPB1*04:01	HLA-DQA1*04:01/DQB1*04:02	5620	5615	5672	709	709	721
HLA-DRB1*01:01	HLA-DPA1*01:03/DPB1*04:01	HLA-DQA1*05:01/DQB1*02:01	5620	5615	5672	709	709	721
HLA-DRB1*01:01	HLA-DPA1*01:03/DPB1*04:01	HLA-DQA1*05:01/DQB1*03:01	5930	5925	5982	816	816	828
HLA-DRB1*01:01	HLA-DPA1*01:03/DPB1*04:01	HLA-DQA1*05:01/DQB1*03:02	5620	5615	5672	709	709	721
HLA-DRB1*01:01	HLA-DPA1*01:03/DPB1*04:01	HLA-DQA1*05:01/DQB1*06:01	5620	5615	5672	709	709	721
HLA-DRB1*01:01	HLA-DPA1*01:03/DPB1*04:01	HLA-DQA1*05:01/DQB1*06:02	5620	5615	5672	709	709	721
HLA-DRB1*01:01	HLA-DPA1*01:03/DPB1*04:01	HLA-DQA1*05:01/DQB1*06:03	5620	5615	5672	709	709	721
HLA-DRB1*01:01	HLA-DPA1*01:03/DPB1*04:01	HLA-DQA1*05:01/DQB1*06:04	5620	5615	5672	709	709	721
HLA-DRB1*01:01	HLA-DPA1*01:03/DPB1*04:01	HLA-DQA1*06:01/DQB1*02:01	5620	5615	5672	709	709	721
HLA-DRB1*01:01	HLA-DPA1*01:03/DPB1*04:01	HLA-DQA1*06:01/DQB1*03:01	5702	5697	5754	732	732	744
HLA-DRB1*01:01	HLA-DPA1*01:03/DPB1*04:01	HLA-DQA1*06:01/DQB1*03:03	5620	5615	5672	709	709	721
HLA-DRB1*01:01	HLA-DPA1*01:03/DPB1*04:01	HLA-DQA1*06:01/DQB1*04:02	5620	5615	5672	709	709	721
HLA-DRB1*01:01	HLA-DPA1*01:03/DPB1*04:01	HLA-DQA1*06:01/DQB1*06:01	5620	5615	5672	709	709	721
HLA-DRB1*01:01	HLA-DPA1*01:03/DPB1*04:01	HLA-DQA1*06:01/DQB1*06:03	5620	5615	5672	709	709	721
HLA-DRB1*01:01	HLA-DPA1*01:03/DPB1*04:02	HLA-DQA1*01:01/DQB1*02:01	4957	4952	5008	617	617	628
HLA-DRB1*01:01	HLA-DPA1*01:03/DPB1*04:02	HLA-DQA1*01:01/DQB1*05:01	4957	4952	5008	617	617	628
HLA-DRB1*01:01	HLA-DPA1*01:03/DPB1*04:02	HLA-DQA1*01:01/DQB1*05:02	4957	4952	5008	617	617	628
HLA-DRB1*01:01	HLA-DPA1*01:03/DPB1*04:02	HLA-DQA1*01:01/DQB1*05:03	4957	4952	5008	617	617	628
HLA-DRB1*01:01	HLA-DPA1*01:03/DPB1*04:02	HLA-DQA1*01:01/DQB1*06:01	4957	4952	5008	617	617	628
HLA-DRB1*01:01	HLA-DPA1*01:03/DPB1*04:02	HLA-DQA1*01:01/DQB1*06:02	4957	4952	5008	617	617	628
HLA-DRB1*01:01	HLA-DPA1*01:03/DPB1*04:02	HLA-DQA1*01:01/DQB1*06:04	4957	4952	5008	617	617	628
HLA-DRB1*01:01	HLA-DPA1*01:03/DPB1*04:02	HLA-DQA1*01:02/DQB1*02:01	4957	4952	5008	617	617	628
HLA-DRB1*01:01	HLA-DPA1*01:03/DPB1*04:02	HLA-DQA1*01:02/DQB1*05:01	6112	6108	6164	696	696	706
HLA-DRB1*01:01	HLA-DPA1*01:03/DPB1*04:02	HLA-DQA1*01:02/DQB1*05:02	4957	4952	5008	617	617	628
HLA-DRB1*01:01	HLA-DPA1*01:03/DPB1*04:02	HLA-DQA1*01:02/DQB1*05:03	4967	4962	5018	617	617	628
HLA-DRB1*01:01	HLA-DPA1*01:03/DPB1*04:02	HLA-DQA1*01:02/DQB1*06:01	4990	4985	5041	647	647	658
HLA-DRB1*01:01	HLA-DPA1*01:03/DPB1*04:02	HLA-DQA1*01:02/DQB1*06:02	5126	5122	5178	647	648	659
HLA-DRB1*01:01	HLA-DPA1*01:03/DPB1*04:02	HLA-DQA1*01:02/DQB1*06:03	4957	4952	5008	617	617	628
HLA-DRB1*01:01	HLA-DPA1*01:03/DPB1*04:02	HLA-DQA1*01:02/DQB1*06:04	4957	4952	5008	617	617	628
HLA-DRB1*01:01	HLA-DPA1*01:03/DPB1*04:02	HLA-DQA1*01:02/DQB1*06:09	4957	4952	5008	617	617	628
HLA-DRB1*01:01	HLA-DPA1*01:03/DPB1*04:02	HLA-DQA1*01:03/DQB1*03:03	4957	4952	5008	617	617	628
HLA-DRB1*01:01	HLA-DPA1*01:03/DPB1*04:02	HLA-DQA1*01:03/DQB1*05:02	4957	4952	5008	617	617	628
HLA-DRB1*01:01	HLA-DPA1*01:03/DPB1*04:02	HLA-DQA1*01:03/DQB1*05:03	4957	4952	5008	617	617	628
HLA-DRB1*01:01	HLA-DPA1*01:03/DPB1*04:02	HLA-DQA1*01:03/DQB1*06:01	4990	4985	5041	649	649	660
HLA-DRB1*01:01	HLA-DPA1*01:03/DPB1*04:02	HLA-DQA1*01:03/DQB1*06:02	4997	4992	5048	646	646	657
HLA-DRB1*01:01	HLA-DPA1*01:03/DPB1*04:02	HLA-DQA1*01:03/DQB1*06:03	4957	4952	5008	617	617	628
HLA-DRB1*01:01	HLA-DPA1*01:03/DPB1*04:02	HLA-DQA1*01:03/DQB1*06:09	4957	4952	5008	617	617	628
HLA-DRB1*01:01	HLA-DPA1*01:03/DPB1*04:02	HLA-DQA1*02:01/DQB1*02:01	4957	4952	5008	617	617	628
HLA-DRB1*01:01	HLA-DPA1*01:03/DPB1*04:02	HLA-DQA1*02:01/DQB1*02:02	4957	4952	5008	617	617	628
HLA-DRB1*01:01	HLA-DPA1*01:03/DPB1*04:02	HLA-DQA1*02:01/DQB1*03:03	4959	4954	5010	619	619	630
HLA-DRB1*01:01	HLA-DPA1*01:03/DPB1*04:02	HLA-DQA1*02:01/DQB1*04:02	4957	4952	5008	617	617	628
HLA-DRB1*01:01	HLA-DPA1*01:03/DPB1*04:02	HLA-DQA1*02:01/DQB1*06:04	4957	4952	5008	617	617	628
HLA-DRB1*01:01	HLA-DPA1*01:03/DPB1*04:02	HLA-DQA1*03:01/DQB1*03:02	4957	4952	5008	617	617	628
HLA-DRB1*01:01	HLA-DPA1*01:03/DPB1*04:02	HLA-DQA1*03:01/DQB1*06:01	4957	4952	5008	617	617	628
HLA-DRB1*01:01	HLA-DPA1*01:03/DPB1*04:02	HLA-DQA1*04:01/DQB1*02:01	4957	4952	5008	617	617	628
HLA-DRB1*01:01	HLA-DPA1*01:03/DPB1*04:02	HLA-DQA1*04:01/DQB1*03:01	4963	4958	5014	617	617	628
HLA-DRB1*01:01	HLA-DPA1*01:03/DPB1*04:02	HLA-DQA1*04:01/DQB1*03:02	4957	4952	5008	617	617	628
HLA-DRB1*01:01	HLA-DPA1*01:03/DPB1*04:02	HLA-DQA1*04:01/DQB1*03:03	4957	4952	5008	617	617	628
HLA-DRB1*01:01	HLA-DPA1*01:03/DPB1*04:02	HLA-DQA1*04:01/DQB1*04:02	4957	4952	5008	617	617	628
HLA-DRB1*01:01	HLA-DPA1*01:03/DPB1*04:02	HLA-DQA1*05:01/DQB1*02:01	4957	4952	5008	617	617	628
HLA-DRB1*01:01	HLA-DPA1*01:03/DPB1*04:02	HLA-DQA1*05:01/DQB1*03:01	5267	5262	5318	724	724	735
HLA-DRB1*01:01	HLA-DPA1*01:03/DPB1*04:02	HLA-DQA1*05:01/DQB1*03:02	4957	4952	5008	617	617	628
HLA-DRB1*01:01	HLA-DPA1*01:03/DPB1*04:02	HLA-DQA1*05:01/DQB1*06:01	4957	4952	5008	617	617	628
HLA-DRB1*01:01	HLA-DPA1*01:03/DPB1*04:02	HLA-DQA1*05:01/DQB1*06:02	4957	4952	5008	617	617	628
HLA-DRB1*01:01	HLA-DPA1*01:03/DPB1*04:02	HLA-DQA1*05:01/DQB1*06:03	4957	4952	5008	617	617	628
HLA-DRB1*01:01	HLA-DPA1*01:03/DPB1*04:02	HLA-DQA1*05:01/DQB1*06:04	4957	4952	5008	617	617	628
HLA-DRB1*01:01	HLA-DPA1*01:03/DPB1*04:02	HLA-DQA1*06:01/DQB1*02:01	4957	4952	5008	617	617	628
HLA-DRB1*01:01	HLA-DPA1*01:03/DPB1*04:02	HLA-DQA1*06:01/DQB1*03:01	5039	5034	5090	640	640	651
HLA-DRB1*01:01	HLA-DPA1*01:03/DPB1*04:02	HLA-DQA1*06:01/DQB1*03:03	4957	4952	5008	617	617	628
HLA-DRB1*01:01	HLA-DPA1*01:03/DPB1*04:02	HLA-DQA1*06:01/DQB1*04:02	4957	4952	5008	617	617	628
HLA-DRB1*01:01	HLA-DPA1*01:03/DPB1*04:02	HLA-DQA1*06:01/DQB1*06:01	4957	4952	5008	617	617	628
HLA-DRB1*01:01	HLA-DPA1*01:03/DPB1*04:02	HLA-DQA1*06:01/DQB1*06:03	4957	4952	5008	617	617	628
HLA-DRB1*01:01	HLA-DPA1*01:03/DPB1*05:01	HLA-DQA1*01:01/DQB1*02:01	4929	4924	4980	590	590	601
HLA-DRB1*01:01	HLA-DPA1*01:03/DPB1*05:01	HLA-DQA1*01:01/DQB1*05:01	4929	4924	4980	590	590	601
HLA-DRB1*01:01	HLA-DPA1*01:03/DPB1*05:01	HLA-DQA1*01:01/DQB1*05:02	4929	4924	4980	590	590	601
HLA-DRB1*01:01	HLA-DPA1*01:03/DPB1*05:01	HLA-DQA1*01:01/DQB1*05:03	4929	4924	4980	590	590	601
HLA-DRB1*01:01	HLA-DPA1*01:03/DPB1*05:01	HLA-DQA1*01:01/DQB1*06:01	4929	4924	4980	590	590	601
HLA-DRB1*01:01	HLA-DPA1*01:03/DPB1*05:01	HLA-DQA1*01:01/DQB1*06:02	4929	4924	4980	590	590	601
HLA-DRB1*01:01	HLA-DPA1*01:03/DPB1*05:01	HLA-DQA1*01:01/DQB1*06:04	4929	4924	4980	590	590	601
HLA-DRB1*01:01	HLA-DPA1*01:03/DPB1*05:01	HLA-DQA1*01:02/DQB1*02:01	4929	4924	4980	590	590	601
HLA-DRB1*01:01	HLA-DPA1*01:03/DPB1*05:01	HLA-DQA1*01:02/DQB1*05:01	6084	6080	6136	669	669	679
HLA-DRB1*01:01	HLA-DPA1*01:03/DPB1*05:01	HLA-DQA1*01:02/DQB1*05:02	4929	4924	4980	590	590	601
HLA-DRB1*01:01	HLA-DPA1*01:03/DPB1*05:01	HLA-DQA1*01:02/DQB1*05:03	4939	4934	4990	590	590	601
HLA-DRB1*01:01	HLA-DPA1*01:03/DPB1*05:01	HLA-DQA1*01:02/DQB1*06:01	4962	4957	5013	620	620	631
HLA-DRB1*01:01	HLA-DPA1*01:03/DPB1*05:01	HLA-DQA1*01:02/DQB1*06:02	5098	5094	5150	620	621	632
HLA-DRB1*01:01	HLA-DPA1*01:03/DPB1*05:01	HLA-DQA1*01:02/DQB1*06:03	4929	4924	4980	590	590	601
HLA-DRB1*01:01	HLA-DPA1*01:03/DPB1*05:01	HLA-DQA1*01:02/DQB1*06:04	4929	4924	4980	590	590	601
HLA-DRB1*01:01	HLA-DPA1*01:03/DPB1*05:01	HLA-DQA1*01:02/DQB1*06:09	4929	4924	4980	590	590	601
HLA-DRB1*01:01	HLA-DPA1*01:03/DPB1*05:01	HLA-DQA1*01:03/DQB1*03:03	4929	4924	4980	590	590	601
HLA-DRB1*01:01	HLA-DPA1*01:03/DPB1*05:01	HLA-DQA1*01:03/DQB1*05:02	4929	4924	4980	590	590	601
HLA-DRB1*01:01	HLA-DPA1*01:03/DPB1*05:01	HLA-DQA1*01:03/DQB1*05:03	4929	4924	4980	590	590	601
HLA-DRB1*01:01	HLA-DPA1*01:03/DPB1*05:01	HLA-DQA1*01:03/DQB1*06:01	4962	4957	5013	622	622	633
HLA-DRB1*01:01	HLA-DPA1*01:03/DPB1*05:01	HLA-DQA1*01:03/DQB1*06:02	4969	4964	5020	619	619	630
HLA-DRB1*01:01	HLA-DPA1*01:03/DPB1*05:01	HLA-DQA1*01:03/DQB1*06:03	4929	4924	4980	590	590	601
HLA-DRB1*01:01	HLA-DPA1*01:03/DPB1*05:01	HLA-DQA1*01:03/DQB1*06:09	4929	4924	4980	590	590	601
HLA-DRB1*01:01	HLA-DPA1*01:03/DPB1*05:01	HLA-DQA1*02:01/DQB1*02:01	4929	4924	4980	590	590	601
HLA-DRB1*01:01	HLA-DPA1*01:03/DPB1*05:01	HLA-DQA1*02:01/DQB1*02:02	4929	4924	4980	590	590	601
HLA-DRB1*01:01	HLA-DPA1*01:03/DPB1*05:01	HLA-DQA1*02:01/DQB1*03:03	4931	4926	4982	592	592	603
HLA-DRB1*01:01	HLA-DPA1*01:03/DPB1*05:01	HLA-DQA1*02:01/DQB1*04:02	4929	4924	4980	590	590	601
HLA-DRB1*01:01	HLA-DPA1*01:03/DPB1*05:01	HLA-DQA1*02:01/DQB1*06:04	4929	4924	4980	590	590	601
HLA-DRB1*01:01	HLA-DPA1*01:03/DPB1*05:01	HLA-DQA1*03:01/DQB1*03:02	4929	4924	4980	590	590	601
HLA-DRB1*01:01	HLA-DPA1*01:03/DPB1*05:01	HLA-DQA1*03:01/DQB1*06:01	4929	4924	4980	590	590	601
HLA-DRB1*01:01	HLA-DPA1*01:03/DPB1*05:01	HLA-DQA1*04:01/DQB1*02:01	4929	4924	4980	590	590	601
HLA-DRB1*01:01	HLA-DPA1*01:03/DPB1*05:01	HLA-DQA1*04:01/DQB1*03:01	4935	4930	4986	590	590	601
HLA-DRB1*01:01	HLA-DPA1*01:03/DPB1*05:01	HLA-DQA1*04:01/DQB1*03:02	4929	4924	4980	590	590	601
HLA-DRB1*01:01	HLA-DPA1*01:03/DPB1*05:01	HLA-DQA1*04:01/DQB1*03:03	4929	4924	4980	590	590	601
HLA-DRB1*01:01	HLA-DPA1*01:03/DPB1*05:01	HLA-DQA1*04:01/DQB1*04:02	4929	4924	4980	590	590	601
HLA-DRB1*01:01	HLA-DPA1*01:03/DPB1*05:01	HLA-DQA1*05:01/DQB1*02:01	4929	4924	4980	590	590	601
HLA-DRB1*01:01	HLA-DPA1*01:03/DPB1*05:01	HLA-DQA1*05:01/DQB1*03:01	5239	5234	5290	697	697	708
HLA-DRB1*01:01	HLA-DPA1*01:03/DPB1*05:01	HLA-DQA1*05:01/DQB1*03:02	4929	4924	4980	590	590	601
HLA-DRB1*01:01	HLA-DPA1*01:03/DPB1*05:01	HLA-DQA1*05:01/DQB1*06:01	4929	4924	4980	590	590	601
HLA-DRB1*01:01	HLA-DPA1*01:03/DPB1*05:01	HLA-DQA1*05:01/DQB1*06:02	4929	4924	4980	590	590	601
HLA-DRB1*01:01	HLA-DPA1*01:03/DPB1*05:01	HLA-DQA1*05:01/DQB1*06:03	4929	4924	4980	590	590	601
HLA-DRB1*01:01	HLA-DPA1*01:03/DPB1*05:01	HLA-DQA1*05:01/DQB1*06:04	4929	4924	4980	590	590	601
HLA-DRB1*01:01	HLA-DPA1*01:03/DPB1*05:01	HLA-DQA1*06:01/DQB1*02:01	4929	4924	4980	590	590	601
HLA-DRB1*01:01	HLA-DPA1*01:03/DPB1*05:01	HLA-DQA1*06:01/DQB1*03:01	5011	5006	5062	613	613	624
HLA-DRB1*01:01	HLA-DPA1*01:03/DPB1*05:01	HLA-DQA1*06:01/DQB1*03:03	4929	4924	4980	590	590	601
HLA-DRB1*01:01	HLA-DPA1*01:03/DPB1*05:01	HLA-DQA1*06:01/DQB1*04:02	4929	4924	4980	590	590	601
HLA-DRB1*01:01	HLA-DPA1*01:03/DPB1*05:01	HLA-DQA1*06:01/DQB1*06:01	4929	4924	4980	590	590	601
HLA-DRB1*01:01	HLA-DPA1*01:03/DPB1*05:01	HLA-DQA1*06:01/DQB1*06:03	4929	4924	4980	590	590	601
HLA-DRB1*01:01	HLA-DPA1*01:03/DPB1*06:01	HLA-DQA1*01:01/DQB1*02:01	4950	4945	5001	611	611	622
HLA-DRB1*01:01	HLA-DPA1*01:03/DPB1*06:01	HLA-DQA1*01:01/DQB1*05:01	4950	4945	5001	611	611	622
HLA-DRB1*01:01	HLA-DPA1*01:03/DPB1*06:01	HLA-DQA1*01:01/DQB1*05:02	4950	4945	5001	611	611	622
HLA-DRB1*01:01	HLA-DPA1*01:03/DPB1*06:01	HLA-DQA1*01:01/DQB1*05:03	4950	4945	5001	611	611	622
HLA-DRB1*01:01	HLA-DPA1*01:03/DPB1*06:01	HLA-DQA1*01:01/DQB1*06:01	4950	4945	5001	611	611	622
HLA-DRB1*01:01	HLA-DPA1*01:03/DPB1*06:01	HLA-DQA1*01:01/DQB1*06:02	4950	4945	5001	611	611	622
HLA-DRB1*01:01	HLA-DPA1*01:03/DPB1*06:01	HLA-DQA1*01:01/DQB1*06:04	4950	4945	5001	611	611	622
HLA-DRB1*01:01	HLA-DPA1*01:03/DPB1*06:01	HLA-DQA1*01:02/DQB1*02:01	4950	4945	5001	611	611	622
HLA-DRB1*01:01	HLA-DPA1*01:03/DPB1*06:01	HLA-DQA1*01:02/DQB1*05:01	6105	6101	6157	690	690	700
HLA-DRB1*01:01	HLA-DPA1*01:03/DPB1*06:01	HLA-DQA1*01:02/DQB1*05:02	4950	4945	5001	611	611	622
HLA-DRB1*01:01	HLA-DPA1*01:03/DPB1*06:01	HLA-DQA1*01:02/DQB1*05:03	4960	4955	5011	611	611	622
HLA-DRB1*01:01	HLA-DPA1*01:03/DPB1*06:01	HLA-DQA1*01:02/DQB1*06:01	4983	4978	5034	641	641	652
HLA-DRB1*01:01	HLA-DPA1*01:03/DPB1*06:01	HLA-DQA1*01:02/DQB1*06:02	5119	5115	5171	641	642	653
HLA-DRB1*01:01	HLA-DPA1*01:03/DPB1*06:01	HLA-DQA1*01:02/DQB1*06:03	4950	4945	5001	611	611	622
HLA-DRB1*01:01	HLA-DPA1*01:03/DPB1*06:01	HLA-DQA1*01:02/DQB1*06:04	4950	4945	5001	611	611	622
HLA-DRB1*01:01	HLA-DPA1*01:03/DPB1*06:01	HLA-DQA1*01:02/DQB1*06:09	4950	4945	5001	611	611	622
HLA-DRB1*01:01	HLA-DPA1*01:03/DPB1*06:01	HLA-DQA1*01:03/DQB1*03:03	4950	4945	5001	611	611	622
HLA-DRB1*01:01	HLA-DPA1*01:03/DPB1*06:01	HLA-DQA1*01:03/DQB1*05:02	4950	4945	5001	611	611	622
HLA-DRB1*01:01	HLA-DPA1*01:03/DPB1*06:01	HLA-DQA1*01:03/DQB1*05:03	4950	4945	5001	611	611	622
HLA-DRB1*01:01	HLA-DPA1*01:03/DPB1*06:01	HLA-DQA1*01:03/DQB1*06:01	4983	4978	5034	643	643	654
HLA-DRB1*01:01	HLA-DPA1*01:03/DPB1*06:01	HLA-DQA1*01:03/DQB1*06:02	4990	4985	5041	640	640	651
HLA-DRB1*01:01	HLA-DPA1*01:03/DPB1*06:01	HLA-DQA1*01:03/DQB1*06:03	4950	4945	5001	611	611	622
HLA-DRB1*01:01	HLA-DPA1*01:03/DPB1*06:01	HLA-DQA1*01:03/DQB1*06:09	4950	4945	5001	611	611	622
HLA-DRB1*01:01	HLA-DPA1*01:03/DPB1*06:01	HLA-DQA1*02:01/DQB1*02:01	4950	4945	5001	611	611	622
HLA-DRB1*01:01	HLA-DPA1*01:03/DPB1*06:01	HLA-DQA1*02:01/DQB1*02:02	4950	4945	5001	611	611	622
HLA-DRB1*01:01	HLA-DPA1*01:03/DPB1*06:01	HLA-DQA1*02:01/DQB1*03:03	4952	4947	5003	613	613	624
HLA-DRB1*01:01	HLA-DPA1*01:03/DPB1*06:01	HLA-DQA1*02:01/DQB1*04:02	4950	4945	5001	611	611	622
HLA-DRB1*01:01	HLA-DPA1*01:03/DPB1*06:01	HLA-DQA1*02:01/DQB1*06:04	4950	4945	5001	611	611	622
HLA-DRB1*01:01	HLA-DPA1*01:03/DPB1*06:01	HLA-DQA1*03:01/DQB1*03:02	4950	4945	5001	611	611	622
HLA-DRB1*01:01	HLA-DPA1*01:03/DPB1*06:01	HLA-DQA1*03:01/DQB1*06:01	4950	4945	5001	611	611	622
HLA-DRB1*01:01	HLA-DPA1*01:03/DPB1*06:01	HLA-DQA1*04:01/DQB1*02:01	4950	4945	5001	611	611	622
HLA-DRB1*01:01	HLA-DPA1*01:03/DPB1*06:01	HLA-DQA1*04:01/DQB1*03:01	4956	4951	5007	611	611	622
HLA-DRB1*01:01	HLA-DPA1*01:03/DPB1*06:01	HLA-DQA1*04:01/DQB1*03:02	4950	4945	5001	611	611	622
HLA-DRB1*01:01	HLA-DPA1*01:03/DPB1*06:01	HLA-DQA1*04:01/DQB1*03:03	4950	4945	5001	611	611	622
HLA-DRB1*01:01	HLA-DPA1*01:03/DPB1*06:01	HLA-DQA1*04:01/DQB1*04:02	4950	4945	5001	611	611	622
HLA-DRB1*01:01	HLA-DPA1*01:03/DPB1*06:01	HLA-DQA1*05:01/DQB1*02:01	4950	4945	5001	611	611	622
HLA-DRB1*01:01	HLA-DPA1*01:03/DPB1*06:01	HLA-DQA1*05:01/DQB1*03:01	5260	5255	5311	718	718	729
HLA-DRB1*01:01	HLA-DPA1*01:03/DPB1*06:01	HLA-DQA1*05:01/DQB1*03:02	4950	4945	5001	611	611	622
HLA-DRB1*01:01	HLA-DPA1*01:03/DPB1*06:01	HLA-DQA1*05:01/DQB1*06:01	4950	4945	5001	611	611	622
HLA-DRB1*01:01	HLA-DPA1*01:03/DPB1*06:01	HLA-DQA1*05:01/DQB1*06:02	4950	4945	5001	611	611	622
HLA-DRB1*01:01	HLA-DPA1*01:03/DPB1*06:01	HLA-DQA1*05:01/DQB1*06:03	4950	4945	5001	611	611	622
HLA-DRB1*01:01	HLA-DPA1*01:03/DPB1*06:01	HLA-DQA1*05:01/DQB1*06:04	4950	4945	5001	611	611	622
HLA-DRB1*01:01	HLA-DPA1*01:03/DPB1*06:01	HLA-DQA1*06:01/DQB1*02:01	4950	4945	5001	611	611	622
HLA-DRB1*01:01	HLA-DPA1*01:03/DPB1*06:01	HLA-DQA1*06:01/DQB1*03:01	5032	5027	5083	634	634	645
HLA-DRB1*01:01	HLA-DPA1*01:03/DPB1*06:01	HLA-DQA1*06:01/DQB1*03:03	4950	4945	5001	611	611	622
HLA-DRB1*01:01	HLA-DPA1*01:03/DPB1*06:01	HLA-DQA1*06:01/DQB1*04:02	4950	4945	5001	611	611	622
HLA-DRB1*01:01	HLA-DPA1*01:03/DPB1*06:01	HLA-DQA1*06:01/DQB1*06:01	4950	4945	5001	611	611	622
HLA-DRB1*01:01	HLA-DPA1*01:03/DPB1*06:01	HLA-DQA1*06:01/DQB1*06:03	4950	4945	5001	611	611	622
HLA-DRB1*01:01	HLA-DPA1*01:03/DPB1*11:01	HLA-DQA1*01:01/DQB1*02:01	4930	4925	4981	591	591	602
HLA-DRB1*01:01	HLA-DPA1*01:03/DPB1*11:01	HLA-DQA1*01:01/DQB1*05:01	4930	4925	4981	591	591	602
HLA-DRB1*01:01	HLA-DPA1*01:03/DPB1*11:01	HLA-DQA1*01:01/DQB1*05:02	4930	4925	4981	591	591	602
HLA-DRB1*01:01	HLA-DPA1*01:03/DPB1*11:01	HLA-DQA1*01:01/DQB1*05:03	4930	4925	4981	591	591	602
HLA-DRB1*01:01	HLA-DPA1*01:03/DPB1*11:01	HLA-DQA1*01:01/DQB1*06:01	4930	4925	4981	591	591	602
HLA-DRB1*01:01	HLA-DPA1*01:03/DPB1*11:01	HLA-DQA1*01:01/DQB1*06:02	4930	4925	4981	591	591	602
HLA-DRB1*01:01	HLA-DPA1*01:03/DPB1*11:01	HLA-DQA1*01:01/DQB1*06:04	4930	4925	4981	591	591	602
HLA-DRB1*01:01	HLA-DPA1*01:03/DPB1*11:01	HLA-DQA1*01:02/DQB1*02:01	4930	4925	4981	591	591	602
HLA-DRB1*01:01	HLA-DPA1*01:03/DPB1*11:01	HLA-DQA1*01:02/DQB1*05:01	6085	6081	6137	670	670	680
HLA-DRB1*01:01	HLA-DPA1*01:03/DPB1*11:01	HLA-DQA1*01:02/DQB1*05:02	4930	4925	4981	591	591	602
HLA-DRB1*01:01	HLA-DPA1*01:03/DPB1*11:01	HLA-DQA1*01:02/DQB1*05:03	4940	4935	4991	591	591	602
HLA-DRB1*01:01	HLA-DPA1*01:03/DPB1*11:01	HLA-DQA1*01:02/DQB1*06:01	4963	4958	5014	621	621	632
HLA-DRB1*01:01	HLA-DPA1*01:03/DPB1*11:01	HLA-DQA1*01:02/DQB1*06:02	5099	5095	5151	621	622	633
HLA-DRB1*01:01	HLA-DPA1*01:03/DPB1*11:01	HLA-DQA1*01:02/DQB1*06:03	4930	4925	4981	591	591	602
HLA-DRB1*01:01	HLA-DPA1*01:03/DPB1*11:01	HLA-DQA1*01:02/DQB1*06:04	4930	4925	4981	591	591	602
HLA-DRB1*01:01	HLA-DPA1*01:03/DPB1*11:01	HLA-DQA1*01:02/DQB1*06:09	4930	4925	4981	591	591	602
HLA-DRB1*01:01	HLA-DPA1*01:03/DPB1*11:01	HLA-DQA1*01:03/DQB1*03:03	4930	4925	4981	591	591	602
HLA-DRB1*01:01	HLA-DPA1*01:03/DPB1*11:01	HLA-DQA1*01:03/DQB1*05:02	4930	4925	4981	591	591	602
HLA-DRB1*01:01	HLA-DPA1*01:03/DPB1*11:01	HLA-DQA1*01:03/DQB1*05:03	4930	4925	4981	591	591	602
HLA-DRB1*01:01	HLA-DPA1*01:03/DPB1*11:01	HLA-DQA1*01:03/DQB1*06:01	4963	4958	5014	623	623	634
HLA-DRB1*01:01	HLA-DPA1*01:03/DPB1*11:01	HLA-DQA1*01:03/DQB1*06:02	4970	4965	5021	620	620	631
HLA-DRB1*01:01	HLA-DPA1*01:03/DPB1*11:01	HLA-DQA1*01:03/DQB1*06:03	4930	4925	4981	591	591	602
HLA-DRB1*01:01	HLA-DPA1*01:03/DPB1*11:01	HLA-DQA1*01:03/DQB1*06:09	4930	4925	4981	591	591	602
HLA-DRB1*01:01	HLA-DPA1*01:03/DPB1*11:01	HLA-DQA1*02:01/DQB1*02:01	4930	4925	4981	591	591	602
HLA-DRB1*01:01	HLA-DPA1*01:03/DPB1*11:01	HLA-DQA1*02:01/DQB1*02:02	4930	4925	4981	591	591	602
HLA-DRB1*01:01	HLA-DPA1*01:03/DPB1*11:01	HLA-DQA1*02:01/DQB1*03:03	4932	4927	4983	593	593	604
HLA-DRB1*01:01	HLA-DPA1*01:03/DPB1*11:01	HLA-DQA1*02:01/DQB1*04:02	4930	4925	4981	591	591	602
HLA-DRB1*01:01	HLA-DPA1*01:03/DPB1*11:01	HLA-DQA1*02:01/DQB1*06:04	4930	4925	4981	591	591	602
HLA-DRB1*01:01	HLA-DPA1*01:03/DPB1*11:01	HLA-DQA1*03:01/DQB1*03:02	4930	4925	4981	591	591	602
HLA-DRB1*01:01	HLA-DPA1*01:03/DPB1*11:01	HLA-DQA1*03:01/DQB1*06:01	4930	4925	4981	591	591	602
HLA-DRB1*01:01	HLA-DPA1*01:03/DPB1*11:01	HLA-DQA1*04:01/DQB1*02:01	4930	4925	4981	591	591	602
HLA-DRB1*01:01	HLA-DPA1*01:03/DPB1*11:01	HLA-DQA1*04:01/DQB1*03:01	4936	4931	4987	591	591	602
HLA-DRB1*01:01	HLA-DPA1*01:03/DPB1*11:01	HLA-DQA1*04:01/DQB1*03:02	4930	4925	4981	591	591	602
HLA-DRB1*01:01	HLA-DPA1*01:03/DPB1*11:01	HLA-DQA1*04:01/DQB1*03:03	4930	4925	4981	591	591	602
HLA-DRB1*01:01	HLA-DPA1*01:03/DPB1*11:01	HLA-DQA1*04:01/DQB1*04:02	4930	4925	4981	591	591	602
HLA-DRB1*01:01	HLA-DPA1*01:03/DPB1*11:01	HLA-DQA1*05:01/DQB1*02:01	4930	4925	4981	591	591	602
HLA-DRB1*01:01	HLA-DPA1*01:03/DPB1*11:01	HLA-DQA1*05:01/DQB1*03:01	5240	5235	5291	698	698	709
HLA-DRB1*01:01	HLA-DPA1*01:03/DPB1*11:01	HLA-DQA1*05:01/DQB1*03:02	4930	4925	4981	591	591	602
HLA-DRB1*01:01	HLA-DPA1*01:03/DPB1*11:01	HLA-DQA1*05:01/DQB1*06:01	4930	4925	4981	591	591	602
HLA-DRB1*01:01	HLA-DPA1*01:03/DPB1*11:01	HLA-DQA1*05:01/DQB1*06:02	4930	4925	4981	591	591	602
HLA-DRB1*01:01	HLA-DPA1*01:03/DPB1*11:01	HLA-DQA1*05:01/DQB1*06:03	4930	4925	4981	591	591	602
HLA-DRB1*01:01	HLA-DPA1*01:03/DPB1*11:01	HLA-DQA1*05:01/DQB1*06:04	4930	4925	4981	591	591	602
HLA-DRB1*01:01	HLA-DPA1*01:03/DPB1*11:01	HLA-DQA1*06:01/DQB1*02:01	4930	4925	4981	591	591	602
HLA-DRB1*01:01	HLA-DPA1*01:03/DPB1*11:01	HLA-DQA1*06:01/DQB1*03:01	5012	5007	5063	614	614	625
HLA-DRB1*01:01	HLA-DPA1*01:03/DPB1*11:01	HLA-DQA1*06:01/DQB1*03:03	4930	4925	4981	591	591	602
HLA-DRB1*01:01	HLA-DPA1*01:03/DPB1*11:01	HLA-DQA1*06:01/DQB1*04:02	4930	4925	4981	591	591	602
HLA-DRB1*01:01	HLA-DPA1*01:03/DPB1*11:01	HLA-DQA1*06:01/DQB1*06:01	4930	4925	4981	591	591	602
HLA-DRB1*01:01	HLA-DPA1*01:03/DPB1*11:01	HLA-DQA1*06:01/DQB1*06:03	4930	4925	4981	591	591	602
HLA-DRB1*01:01	HLA-DPA1*01:03/DPB1*17:01	HLA-DQA1*01:01/DQB1*02:01	4929	4924	4980	590	590	601
HLA-DRB1*01:01	HLA-DPA1*01:03/DPB1*17:01	HLA-DQA1*01:01/DQB1*05:01	4929	4924	4980	590	590	601
HLA-DRB1*01:01	HLA-DPA1*01:03/DPB1*17:01	HLA-DQA1*01:01/DQB1*05:02	4929	4924	4980	590	590	601
HLA-DRB1*01:01	HLA-DPA1*01:03/DPB1*17:01	HLA-DQA1*01:01/DQB1*05:03	4929	4924	4980	590	590	601
HLA-DRB1*01:01	HLA-DPA1*01:03/DPB1*17:01	HLA-DQA1*01:01/DQB1*06:01	4929	4924	4980	590	590	601
HLA-DRB1*01:01	HLA-DPA1*01:03/DPB1*17:01	HLA-DQA1*01:01/DQB1*06:02	4929	4924	4980	590	590	601
HLA-DRB1*01:01	HLA-DPA1*01:03/DPB1*17:01	HLA-DQA1*01:01/DQB1*06:04	4929	4924	4980	590	590	601
HLA-DRB1*01:01	HLA-DPA1*01:03/DPB1*17:01	HLA-DQA1*01:02/DQB1*02:01	4929	4924	4980	590	590	601
HLA-DRB1*01:01	HLA-DPA1*01:03/DPB1*17:01	HLA-DQA1*01:02/DQB1*05:01	6084	6080	6136	669	669	679
HLA-DRB1*01:01	HLA-DPA1*01:03/DPB1*17:01	HLA-DQA1*01:02/DQB1*05:02	4929	4924	4980	590	590	601
HLA-DRB1*01:01	HLA-DPA1*01:03/DPB1*17:01	HLA-DQA1*01:02/DQB1*05:03	4939	4934	4990	590	590	601
HLA-DRB1*01:01	HLA-DPA1*01:03/DPB1*17:01	HLA-DQA1*01:02/DQB1*06:01	4962	4957	5013	620	620	631
HLA-DRB1*01:01	HLA-DPA1*01:03/DPB1*17:01	HLA-DQA1*01:02/DQB1*06:02	5098	5094	5150	620	621	632
HLA-DRB1*01:01	HLA-DPA1*01:03/DPB1*17:01	HLA-DQA1*01:02/DQB1*06:03	4929	4924	4980	590	590	601
HLA-DRB1*01:01	HLA-DPA1*01:03/DPB1*17:01	HLA-DQA1*01:02/DQB1*06:04	4929	4924	4980	590	590	601
HLA-DRB1*01:01	HLA-DPA1*01:03/DPB1*17:01	HLA-DQA1*01:02/DQB1*06:09	4929	4924	4980	590	590	601
HLA-DRB1*01:01	HLA-DPA1*01:03/DPB1*17:01	HLA-DQA1*01:03/DQB1*03:03	4929	4924	4980	590	590	601
HLA-DRB1*01:01	HLA-DPA1*01:03/DPB1*17:01	HLA-DQA1*01:03/DQB1*05:02	4929	4924	4980	590	590	601
HLA-DRB1*01:01	HLA-DPA1*01:03/DPB1*17:01	HLA-DQA1*01:03/DQB1*05:03	4929	4924	4980	590	590	601
HLA-DRB1*01:01	HLA-DPA1*01:03/DPB1*17:01	HLA-DQA1*01:03/DQB1*06:01	4962	4957	5013	622	622	633
HLA-DRB1*01:01	HLA-DPA1*01:03/DPB1*17:01	HLA-DQA1*01:03/DQB1*06:02	4969	4964	5020	619	619	630
HLA-DRB1*01:01	HLA-DPA1*01:03/DPB1*17:01	HLA-DQA1*01:03/DQB1*06:03	4929	4924	4980	590	590	601
HLA-DRB1*01:01	HLA-DPA1*01:03/DPB1*17:01	HLA-DQA1*01:03/DQB1*06:09	4929	4924	4980	590	590	601
HLA-DRB1*01:01	HLA-DPA1*01:03/DPB1*17:01	HLA-DQA1*02:01/DQB1*02:01	4929	4924	4980	590	590	601
HLA-DRB1*01:01	HLA-DPA1*01:03/DPB1*17:01	HLA-DQA1*02:01/DQB1*02:02	4929	4924	4980	590	590	601
HLA-DRB1*01:01	HLA-DPA1*01:03/DPB1*17:01	HLA-DQA1*02:01/DQB1*03:03	4931	4926	4982	592	592	603
HLA-DRB1*01:01	HLA-DPA1*01:03/DPB1*17:01	HLA-DQA1*02:01/DQB1*04:02	4929	4924	4980	590	590	601
HLA-DRB1*01:01	HLA-DPA1*01:03/DPB1*17:01	HLA-DQA1*02:01/DQB1*06:04	4929	4924	4980	590	590	601
HLA-DRB1*01:01	HLA-DPA1*01:03/DPB1*17:01	HLA-DQA1*03:01/DQB1*03:02	4929	4924	4980	590	590	601
HLA-DRB1*01:01	HLA-DPA1*01:03/DPB1*17:01	HLA-DQA1*03:01/DQB1*06:01	4929	4924	4980	590	590	601
HLA-DRB1*01:01	HLA-DPA1*01:03/DPB1*17:01	HLA-DQA1*04:01/DQB1*02:01	4929	4924	4980	590	590	601
HLA-DRB1*01:01	HLA-DPA1*01:03/DPB1*17:01	HLA-DQA1*04:01/DQB1*03:01	4935	4930	4986	590	590	601
HLA-DRB1*01:01	HLA-DPA1*01:03/DPB1*17:01	HLA-DQA1*04:01/DQB1*03:02	4929	4924	4980	590	590	601
HLA-DRB1*01:01	HLA-DPA1*01:03/DPB1*17:01	HLA-DQA1*04:01/DQB1*03:03	4929	4924	4980	590	590	601
HLA-DRB1*01:01	HLA-DPA1*01:03/DPB1*17:01	HLA-DQA1*04:01/DQB1*04:02	4929	4924	4980	590	590	601
HLA-DRB1*01:01	HLA-DPA1*01:03/DPB1*17:01	HLA-DQA1*05:01/DQB1*02:01	4929	4924	4980	590	590	601
HLA-DRB1*01:01	HLA-DPA1*01:03/DPB1*17:01	HLA-DQA1*05:01/DQB1*03:01	5239	5234	5290	697	697	708
HLA-DRB1*01:01	HLA-DPA1*01:03/DPB1*17:01	HLA-DQA1*05:01/DQB1*03:02	4929	4924	4980	590	590	601
HLA-DRB1*01:01	HLA-DPA1*01:03/DPB1*17:01	HLA-DQA1*05:01/DQB1*06:01	4929	4924	4980	590	590	601
HLA-DRB1*01:01	HLA-DPA1*01:03/DPB1*17:01	HLA-DQA1*05:01/DQB1*06:02	4929	4924	4980	590	590	601
HLA-DRB1*01:01	HLA-DPA1*01:03/DPB1*17:01	HLA-DQA1*05:01/DQB1*06:03	4929	4924	4980	590	590	601
HLA-DRB1*01:01	HLA-DPA1*01:03/DPB1*17:01	HLA-DQA1*05:01/DQB1*06:04	4929	4924	4980	590	590	601
HLA-DRB1*01:01	HLA-DPA1*01:03/DPB1*17:01	HLA-DQA1*06:01/DQB1*02:01	4929	4924	4980	590	590	601
HLA-DRB1*01:01	HLA-DPA1*01:03/DPB1*17:01	HLA-DQA1*06:01/DQB1*03:01	5011	5006	5062	613	613	624
HLA-DRB1*01:01	HLA-DPA1*01:03/DPB1*17:01	HLA-DQA1*06:01/DQB1*03:03	4929	4924	4980	590	590	601
HLA-DRB1*01:01	HLA-DPA1*01:03/DPB1*17:01	HLA-DQA1*06:01/DQB1*04:02	4929	4924	4980	590	590	601
HLA-DRB1*01:01	HLA-DPA1*01:03/DPB1*17:01	HLA-DQA1*06:01/DQB1*06:01	4929	4924	4980	590	590	601
HLA-DRB1*01:01	HLA-DPA1*01:03/DPB1*17:01	HLA-DQA1*06:01/DQB1*06:03	4929	4924	4980	590	590	601
HLA-DRB1*01:01	HLA-DPA1*02:01/DPB1*01:01	HLA-DQA1*01:01/DQB1*02:01	5165	5160	5216	654	654	665
HLA-DRB1*01:01	HLA-DPA1*02:01/DPB1*01:01	HLA-DQA1*01:01/DQB1*05:01	5165	5160	5216	654	654	665
HLA-DRB1*01:01	HLA-DPA1*02:01/DPB1*01:01	HLA-DQA1*01:01/DQB1*05:02	5165	5160	5216	654	654	665
HLA-DRB1*01:01	HLA-DPA1*02:01/DPB1*01:01	HLA-DQA1*01:01/DQB1*05:03	5165	5160	5216	654	654	665
HLA-DRB1*01:01	HLA-DPA1*02:01/DPB1*01:01	HLA-DQA1*01:01/DQB1*06:01	5165	5160	5216	654	654	665
HLA-DRB1*01:01	HLA-DPA1*02:01/DPB1*01:01	HLA-DQA1*01:01/DQB1*06:02	5165	5160	5216	654	654	665
HLA-DRB1*01:01	HLA-DPA1*02:01/DPB1*01:01	HLA-DQA1*01:01/DQB1*06:04	5165	5160	5216	654	654	665
HLA-DRB1*01:01	HLA-DPA1*02:01/DPB1*01:01	HLA-DQA1*01:02/DQB1*02:01	5165	5160	5216	654	654	665
HLA-DRB1*01:01	HLA-DPA1*02:01/DPB1*01:01	HLA-DQA1*01:02/DQB1*05:01	6318	6314	6370	733	733	743
HLA-DRB1*01:01	HLA-DPA1*02:01/DPB1*01:01	HLA-DQA1*01:02/DQB1*05:02	5165	5160	5216	654	654	665
HLA-DRB1*01:01	HLA-DPA1*02:01/DPB1*01:01	HLA-DQA1*01:02/DQB1*05:03	5175	5170	5226	654	654	665
HLA-DRB1*01:01	HLA-DPA1*02:01/DPB1*01:01	HLA-DQA1*01:02/DQB1*06:01	5198	5193	5249	684	684	695
HLA-DRB1*01:01	HLA-DPA1*02:01/DPB1*01:01	HLA-DQA1*01:02/DQB1*06:02	5334	5330	5386	684	685	696
HLA-DRB1*01:01	HLA-DPA1*02:01/DPB1*01:01	HLA-DQA1*01:02/DQB1*06:03	5165	5160	5216	654	654	665
HLA-DRB1*01:01	HLA-DPA1*02:01/DPB1*01:01	HLA-DQA1*01:02/DQB1*06:04	5165	5160	5216	654	654	665
HLA-DRB1*01:01	HLA-DPA1*02:01/DPB1*01:01	HLA-DQA1*01:02/DQB1*06:09	5165	5160	5216	654	654	665
HLA-DRB1*01:01	HLA-DPA1*02:01/DPB1*01:01	HLA-DQA1*01:03/DQB1*03:03	5165	5160	5216	654	654	665
HLA-DRB1*01:01	HLA-DPA1*02:01/DPB1*01:01	HLA-DQA1*01:03/DQB1*05:02	5165	5160	5216	654	654	665
HLA-DRB1*01:01	HLA-DPA1*02:01/DPB1*01:01	HLA-DQA1*01:03/DQB1*05:03	5165	5160	5216	654	654	665
HLA-DRB1*01:01	HLA-DPA1*02:01/DPB1*01:01	HLA-DQA1*01:03/DQB1*06:01	5198	5193	5249	686	686	697
HLA-DRB1*01:01	HLA-DPA1*02:01/DPB1*01:01	HLA-DQA1*01:03/DQB1*06:02	5205	5200	5256	683	683	694
HLA-DRB1*01:01	HLA-DPA1*02:01/DPB1*01:01	HLA-DQA1*01:03/DQB1*06:03	5165	5160	5216	654	654	665
HLA-DRB1*01:01	HLA-DPA1*02:01/DPB1*01:01	HLA-DQA1*01:03/DQB1*06:09	5165	5160	5216	654	654	665
HLA-DRB1*01:01	HLA-DPA1*02:01/DPB1*01:01	HLA-DQA1*02:01/DQB1*02:01	5165	5160	5216	654	654	665
HLA-DRB1*01:01	HLA-DPA1*02:01/DPB1*01:01	HLA-DQA1*02:01/DQB1*02:02	5165	5160	5216	654	654	665
HLA-DRB1*01:01	HLA-DPA1*02:01/DPB1*01:01	HLA-DQA1*02:01/DQB1*03:03	5167	5162	5218	656	656	667
HLA-DRB1*01:01	HLA-DPA1*02:01/DPB1*01:01	HLA-DQA1*02:01/DQB1*04:02	5165	5160	5216	654	654	665
HLA-DRB1*01:01	HLA-DPA1*02:01/DPB1*01:01	HLA-DQA1*02:01/DQB1*06:04	5165	5160	5216	654	654	665
HLA-DRB1*01:01	HLA-DPA1*02:01/DPB1*01:01	HLA-DQA1*03:01/DQB1*03:02	5165	5160	5216	654	654	665
HLA-DRB1*01:01	HLA-DPA1*02:01/DPB1*01:01	HLA-DQA1*03:01/DQB1*06:01	5165	5160	5216	654	654	665
HLA-DRB1*01:01	HLA-DPA1*02:01/DPB1*01:01	HLA-DQA1*04:01/DQB1*02:01	5165	5160	5216	654	654	665
HLA-DRB1*01:01	HLA-DPA1*02:01/DPB1*01:01	HLA-DQA1*04:01/DQB1*03:01	5171	5166	5222	654	654	665
HLA-DRB1*01:01	HLA-DPA1*02:01/DPB1*01:01	HLA-DQA1*04:01/DQB1*03:02	5165	5160	5216	654	654	665
HLA-DRB1*01:01	HLA-DPA1*02:01/DPB1*01:01	HLA-DQA1*04:01/DQB1*03:03	5165	5160	5216	654	654	665
HLA-DRB1*01:01	HLA-DPA1*02:01/DPB1*01:01	HLA-DQA1*04:01/DQB1*04:02	5165	5160	5216	654	654	665
HLA-DRB1*01:01	HLA-DPA1*02:01/DPB1*01:01	HLA-DQA1*05:01/DQB1*02:01	5165	5160	5216	654	654	665
HLA-DRB1*01:01	HLA-DPA1*02:01/DPB1*01:01	HLA-DQA1*05:01/DQB1*03:01	5475	5470	5526	761	761	772
HLA-DRB1*01:01	HLA-DPA1*02:01/DPB1*01:01	HLA-DQA1*05:01/DQB1*03:02	5165	5160	5216	654	654	665
HLA-DRB1*01:01	HLA-DPA1*02:01/DPB1*01:01	HLA-DQA1*05:01/DQB1*06:01	5165	5160	5216	654	654	665
HLA-DRB1*01:01	HLA-DPA1*02:01/DPB1*01:01	HLA-DQA1*05:01/DQB1*06:02	5165	5160	5216	654	654	665
HLA-DRB1*01:01	HLA-DPA1*02:01/DPB1*01:01	HLA-DQA1*05:01/DQB1*06:03	5165	5160	5216	654	654	665
HLA-DRB1*01:01	HLA-DPA1*02:01/DPB1*01:01	HLA-DQA1*05:01/DQB1*06:04	5165	5160	5216	654	654	665
HLA-DRB1*01:01	HLA-DPA1*02:01/DPB1*01:01	HLA-DQA1*06:01/DQB1*02:01	5165	5160	5216	654	654	665
HLA-DRB1*01:01	HLA-DPA1*02:01/DPB1*01:01	HLA-DQA1*06:01/DQB1*03:01	5247	5242	5298	677	677	688
HLA-DRB1*01:01	HLA-DPA1*02:01/DPB1*01:01	HLA-DQA1*06:01/DQB1*03:03	5165	5160	5216	654	654	665
HLA-DRB1*01:01	HLA-DPA1*02:01/DPB1*01:01	HLA-DQA1*06:01/DQB1*04:02	5165	5160	5216	654	654	665
HLA-DRB1*01:01	HLA-DPA1*02:01/DPB1*01:01	HLA-DQA1*06:01/DQB1*06:01	5165	5160	5216	654	654	665
HLA-DRB1*01:01	HLA-DPA1*02:01/DPB1*01:01	HLA-DQA1*06:01/DQB1*06:03	5165	5160	5216	654	654	665
HLA-DRB1*01:01	HLA-DPA1*02:01/DPB1*05:01	HLA-DQA1*01:01/DQB1*02:01	4929	4924	4980	590	590	601
HLA-DRB1*01:01	HLA-DPA1*02:01/DPB1*05:01	HLA-DQA1*01:01/DQB1*05:01	4929	4924	4980	590	590	601
HLA-DRB1*01:01	HLA-DPA1*02:01/DPB1*05:01	HLA-DQA1*01:01/DQB1*05:02	4929	4924	4980	590	590	601
HLA-DRB1*01:01	HLA-DPA1*02:01/DPB1*05:01	HLA-DQA1*01:01/DQB1*05:03	4929	4924	4980	590	590	601
HLA-DRB1*01:01	HLA-DPA1*02:01/DPB1*05:01	HLA-DQA1*01:01/DQB1*06:01	4929	4924	4980	590	590	601
HLA-DRB1*01:01	HLA-DPA1*02:01/DPB1*05:01	HLA-DQA1*01:01/DQB1*06:02	4929	4924	4980	590	590	601
HLA-DRB1*01:01	HLA-DPA1*02:01/DPB1*05:01	HLA-DQA1*01:01/DQB1*06:04	4929	4924	4980	590	590	601
HLA-DRB1*01:01	HLA-DPA1*02:01/DPB1*05:01	HLA-DQA1*01:02/DQB1*02:01	4929	4924	4980	590	590	601
HLA-DRB1*01:01	HLA-DPA1*02:01/DPB1*05:01	HLA-DQA1*01:02/DQB1*05:01	6084	6080	6136	669	669	679
HLA-DRB1*01:01	HLA-DPA1*02:01/DPB1*05:01	HLA-DQA1*01:02/DQB1*05:02	4929	4924	4980	590	590	601
HLA-DRB1*01:01	HLA-DPA1*02:01/DPB1*05:01	HLA-DQA1*01:02/DQB1*05:03	4939	4934	4990	590	590	601
HLA-DRB1*01:01	HLA-DPA1*02:01/DPB1*05:01	HLA-DQA1*01:02/DQB1*06:01	4962	4957	5013	620	620	631
HLA-DRB1*01:01	HLA-DPA1*02:01/DPB1*05:01	HLA-DQA1*01:02/DQB1*06:02	5098	5094	5150	620	621	632
HLA-DRB1*01:01	HLA-DPA1*02:01/DPB1*05:01	HLA-DQA1*01:02/DQB1*06:03	4929	4924	4980	590	590	601
HLA-DRB1*01:01	HLA-DPA1*02:01/DPB1*05:01	HLA-DQA1*01:02/DQB1*06:04	4929	4924	4980	590	590	601
HLA-DRB1*01:01	HLA-DPA1*02:01/DPB1*05:01	HLA-DQA1*01:02/DQB1*06:09	4929	4924	4980	590	590	601
HLA-DRB1*01:01	HLA-DPA1*02:01/DPB1*05:01	HLA-DQA1*01:03/DQB1*03:03	4929	4924	4980	590	590	601
HLA-DRB1*01:01	HLA-DPA1*02:01/DPB1*05:01	HLA-DQA1*01:03/DQB1*05:02	4929	4924	4980	590	590	601
HLA-DRB1*01:01	HLA-DPA1*02:01/DPB1*05:01	HLA-DQA1*01:03/DQB1*05:03	4929	4924	4980	590	590	601
HLA-DRB1*01:01	HLA-DPA1*02:01/DPB1*05:01	HLA-DQA1*01:03/DQB1*06:01	4962	4957	5013	622	622	633
HLA-DRB1*01:01	HLA-DPA1*02:01/DPB1*05:01	HLA-DQA1*01:03/DQB1*06:02	4969	4964	5020	619	619	630
HLA-DRB1*01:01	HLA-DPA1*02:01/DPB1*05:01	HLA-DQA1*01:03/DQB1*06:03	4929	4924	4980	590	590	601
HLA-DRB1*01:01	HLA-DPA1*02:01/DPB1*05:01	HLA-DQA1*01:03/DQB1*06:09	4929	4924	4980	590	590	601
HLA-DRB1*01:01	HLA-DPA1*02:01/DPB1*05:01	HLA-DQA1*02:01/DQB1*02:01	4929	4924	4980	590	590	601
HLA-DRB1*01:01	HLA-DPA1*02:01/DPB1*05:01	HLA-DQA1*02:01/DQB1*02:02	4929	4924	4980	590	590	601
HLA-DRB1*01:01	HLA-DPA1*02:01/DPB1*05:01	HLA-DQA1*02:01/DQB1*03:03	4931	4926	4982	592	592	603
HLA-DRB1*01:01	HLA-DPA1*02:01/DPB1*05:01	HLA-DQA1*02:01/DQB1*04:02	4929	4924	4980	590	590	601
HLA-DRB1*01:01	HLA-DPA1*02:01/DPB1*05:01	HLA-DQA1*02:01/DQB1*06:04	4929	4924	4980	590	590	601
HLA-DRB1*01:01	HLA-DPA1*02:01/DPB1*05:01	HLA-DQA1*03:01/DQB1*03:02	4929	4924	4980	590	590	601
HLA-DRB1*01:01	HLA-DPA1*02:01/DPB1*05:01	HLA-DQA1*03:01/DQB1*06:01	4929	4924	4980	590	590	601
HLA-DRB1*01:01	HLA-DPA1*02:01/DPB1*05:01	HLA-DQA1*04:01/DQB1*02:01	4929	4924	4980	590	590	601
HLA-DRB1*01:01	HLA-DPA1*02:01/DPB1*05:01	HLA-DQA1*04:01/DQB1*03:01	4935	4930	4986	590	590	601
HLA-DRB1*01:01	HLA-DPA1*02:01/DPB1*05:01	HLA-DQA1*04:01/DQB1*03:02	4929	4924	4980	590	590	601
HLA-DRB1*01:01	HLA-DPA1*02:01/DPB1*05:01	HLA-DQA1*04:01/DQB1*03:03	4929	4924	4980	590	590	601
HLA-DRB1*01:01	HLA-DPA1*02:01/DPB1*05:01	HLA-DQA1*04:01/DQB1*04:02	4929	4924	4980	590	590	601
HLA-DRB1*01:01	HLA-DPA1*02:01/DPB1*05:01	HLA-DQA1*05:01/DQB1*02:01	4929	4924	4980	590	590	601
HLA-DRB1*01:01	HLA-DPA1*02:01/DPB1*05:01	HLA-DQA1*05:01/DQB1*03:01	5239	5234	5290	697	697	708
HLA-DRB1*01:01	HLA-DPA1*02:01/DPB1*05:01	HLA-DQA1*05:01/DQB1*03:02	4929	4924	4980	590	590	601
HLA-DRB1*01:01	HLA-DPA1*02:01/DPB1*05:01	HLA-DQA1*05:01/DQB1*06:01	4929	4924	4980	590	590	601
HLA-DRB1*01:01	HLA-DPA1*02:01/DPB1*05:01	HLA-DQA1*05:01/DQB1*06:02	4929	4924	4980	590	590	601
HLA-DRB1*01:01	HLA-DPA1*02:01/DPB1*05:01	HLA-DQA1*05:01/DQB1*06:03	4929	4924	4980	590	590	601
HLA-DRB1*01:01	HLA-DPA1*02:01/DPB1*05:01	HLA-DQA1*05:01/DQB1*06:04	4929	4924	4980	590	590	601
HLA-DRB1*01:01	HLA-DPA1*02:01/DPB1*05:01	HLA-DQA1*06:01/DQB1*02:01	4929	4924	4980	590	590	601
HLA-DRB1*01:01	HLA-DPA1*02:01/DPB1*05:01	HLA-DQA1*06:01/DQB1*03:01	5011	5006	5062	613	613	624
HLA-DRB1*01:01	HLA-DPA1*02:01/DPB1*05:01	HLA-DQA1*06:01/DQB1*03:03	4929	4924	4980	590	590	601
HLA-DRB1*01:01	HLA-DPA1*02:01/DPB1*05:01	HLA-DQA1*06:01/DQB1*04:02	4929	4924	4980	590	590	601
HLA-DRB1*01:01	HLA-DPA1*02:01/DPB1*05:01	HLA-DQA1*06:01/DQB1*06:01	4929	4924	4980	590	590	601
HLA-DRB1*01:01	HLA-DPA1*02:01/DPB1*05:01	HLA-DQA1*06:01/DQB1*06:03	4929	4924	4980	590	590	601
HLA-DRB1*01:01	HLA-DPA1*02:01/DPB1*09:01	HLA-DQA1*01:01/DQB1*02:01	4928	4923	4979	589	589	600
HLA-DRB1*01:01	HLA-DPA1*02:01/DPB1*09:01	HLA-DQA1*01:01/DQB1*05:01	4928	4923	4979	589	589	600
HLA-DRB1*01:01	HLA-DPA1*02:01/DPB1*09:01	HLA-DQA1*01:01/DQB1*05:02	4928	4923	4979	589	589	600
HLA-DRB1*01:01	HLA-DPA1*02:01/DPB1*09:01	HLA-DQA1*01:01/DQB1*05:03	4928	4923	4979	589	589	600
HLA-DRB1*01:01	HLA-DPA1*02:01/DPB1*09:01	HLA-DQA1*01:01/DQB1*06:01	4928	4923	4979	589	589	600
HLA-DRB1*01:01	HLA-DPA1*02:01/DPB1*09:01	HLA-DQA1*01:01/DQB1*06:02	4928	4923	4979	589	589	600
HLA-DRB1*01:01	HLA-DPA1*02:01/DPB1*09:01	HLA-DQA1*01:01/DQB1*06:04	4928	4923	4979	589	589	600
HLA-DRB1*01:01	HLA-DPA1*02:01/DPB1*09:01	HLA-DQA1*01:02/DQB1*02:01	4928	4923	4979	589	589	600
HLA-DRB1*01:01	HLA-DPA1*02:01/DPB1*09:01	HLA-DQA1*01:02/DQB1*05:01	6083	6079	6135	668	668	678
HLA-DRB1*01:01	HLA-DPA1*02:01/DPB1*09:01	HLA-DQA1*01:02/DQB1*05:02	4928	4923	4979	589	589	600
HLA-DRB1*01:01	HLA-DPA1*02:01/DPB1*09:01	HLA-DQA1*01:02/DQB1*05:03	4938	4933	4989	589	589	600
HLA-DRB1*01:01	HLA-DPA1*02:01/DPB1*09:01	HLA-DQA1*01:02/DQB1*06:01	4961	4956	5012	619	619	630
HLA-DRB1*01:01	HLA-DPA1*02:01/DPB1*09:01	HLA-DQA1*01:02/DQB1*06:02	5097	5093	5149	619	620	631
HLA-DRB1*01:01	HLA-DPA1*02:01/DPB1*09:01	HLA-DQA1*01:02/DQB1*06:03	4928	4923	4979	589	589	600
HLA-DRB1*01:01	HLA-DPA1*02:01/DPB1*09:01	HLA-DQA1*01:02/DQB1*06:04	4928	4923	4979	589	589	600
HLA-DRB1*01:01	HLA-DPA1*02:01/DPB1*09:01	HLA-DQA1*01:02/DQB1*06:09	4928	4923	4979	589	589	600
HLA-DRB1*01:01	HLA-DPA1*02:01/DPB1*09:01	HLA-DQA1*01:03/DQB1*03:03	4928	4923	4979	589	589	600
HLA-DRB1*01:01	HLA-DPA1*02:01/DPB1*09:01	HLA-DQA1*01:03/DQB1*05:02	4928	4923	4979	589	589	600
HLA-DRB1*01:01	HLA-DPA1*02:01/DPB1*09:01	HLA-DQA1*01:03/DQB1*05:03	4928	4923	4979	589	589	600
HLA-DRB1*01:01	HLA-DPA1*02:01/DPB1*09:01	HLA-DQA1*01:03/DQB1*06:01	4961	4956	5012	621	621	632
HLA-DRB1*01:01	HLA-DPA1*02:01/DPB1*09:01	HLA-DQA1*01:03/DQB1*06:02	4968	4963	5019	618	618	629
HLA-DRB1*01:01	HLA-DPA1*02:01/DPB1*09:01	HLA-DQA1*01:03/DQB1*06:03	4928	4923	4979	589	589	600
HLA-DRB1*01:01	HLA-DPA1*02:01/DPB1*09:01	HLA-DQA1*01:03/DQB1*06:09	4928	4923	4979	589	589	600
HLA-DRB1*01:01	HLA-DPA1*02:01/DPB1*09:01	HLA-DQA1*02:01/DQB1*02:01	4928	4923	4979	589	589	600
HLA-DRB1*01:01	HLA-DPA1*02:01/DPB1*09:01	HLA-DQA1*02:01/DQB1*02:02	4928	4923	4979	589	589	600
HLA-DRB1*01:01	HLA-DPA1*02:01/DPB1*09:01	HLA-DQA1*02:01/DQB1*03:03	4930	4925	4981	591	591	602
HLA-DRB1*01:01	HLA-DPA1*02:01/DPB1*09:01	HLA-DQA1*02:01/DQB1*04:02	4928	4923	4979	589	589	600
HLA-DRB1*01:01	HLA-DPA1*02:01/DPB1*09:01	HLA-DQA1*02:01/DQB1*06:04	4928	4923	4979	589	589	600
HLA-DRB1*01:01	HLA-DPA1*02:01/DPB1*09:01	HLA-DQA1*03:01/DQB1*03:02	4928	4923	4979	589	589	600
HLA-DRB1*01:01	HLA-DPA1*02:01/DPB1*09:01	HLA-DQA1*03:01/DQB1*06:01	4928	4923	4979	589	589	600
HLA-DRB1*01:01	HLA-DPA1*02:01/DPB1*09:01	HLA-DQA1*04:01/DQB1*02:01	4928	4923	4979	589	589	600
HLA-DRB1*01:01	HLA-DPA1*02:01/DPB1*09:01	HLA-DQA1*04:01/DQB1*03:01	4934	4929	4985	589	589	600
HLA-DRB1*01:01	HLA-DPA1*02:01/DPB1*09:01	HLA-DQA1*04:01/DQB1*03:02	4928	4923	4979	589	589	600
HLA-DRB1*01:01	HLA-DPA1*02:01/DPB1*09:01	HLA-DQA1*04:01/DQB1*03:03	4928	4923	4979	589	589	600
HLA-DRB1*01:01	HLA-DPA1*02:01/DPB1*09:01	HLA-DQA1*04:01/DQB1*04:02	4928	4923	4979	589	589	600
HLA-DRB1*01:01	HLA-DPA1*02:01/DPB1*09:01	HLA-DQA1*05:01/DQB1*02:01	4928	4923	4979	589	589	600
HLA-DRB1*01:01	HLA-DPA1*02:01/DPB1*09:01	HLA-DQA1*05:01/DQB1*03:01	5238	5233	5289	696	696	707
HLA-DRB1*01:01	HLA-DPA1*02:01/DPB1*09:01	HLA-DQA1*05:01/DQB1*03:02	4928	4923	4979	589	589	600
HLA-DRB1*01:01	HLA-DPA1*02:01/DPB1*09:01	HLA-DQA1*05:01/DQB1*06:01	4928	4923	4979	589	589	600
HLA-DRB1*01:01	HLA-DPA1*02:01/DPB1*09:01	HLA-DQA1*05:01/DQB1*06:02	4928	4923	4979	589	589	600
HLA-DRB1*01:01	HLA-DPA1*02:01/DPB1*09:01	HLA-DQA1*05:01/DQB1*06:03	4928	4923	4979	589	589	600
HLA-DRB1*01:01	HLA-DPA1*02:01/DPB1*09:01	HLA-DQA1*05:01/DQB1*06:04	4928	4923	4979	589	589	600
HLA-DRB1*01:01	HLA-DPA1*02:01/DPB1*09:01	HLA-DQA1*06:01/DQB1*02:01	4928	4923	4979	589	589	600
HLA-DRB1*01:01	HLA-DPA1*02:01/DPB1*09:01	HLA-DQA1*06:01/DQB1*03:01	5010	5005	5061	612	612	623
HLA-DRB1*01:01	HLA-DPA1*02:01/DPB1*09:01	HLA-DQA1*06:01/DQB1*03:03	4928	4923	4979	589	589	600
HLA-DRB1*01:01	HLA-DPA1*02:01/DPB1*09:01	HLA-DQA1*06:01/DQB1*04:02	4928	4923	4979	589	589	600
HLA-DRB1*01:01	HLA-DPA1*02:01/DPB1*09:01	HLA-DQA1*06:01/DQB1*06:01	4928	4923	4979	589	589	600
HLA-DRB1*01:01	HLA-DPA1*02:01/DPB1*09:01	HLA-DQA1*06:01/DQB1*06:03	4928	4923	4979	589	589	600
HLA-DRB1*01:01	HLA-DPA1*02:01/DPB1*10:01	HLA-DQA1*01:01/DQB1*02:01	4928	4923	4979	589	589	600
HLA-DRB1*01:01	HLA-DPA1*02:01/DPB1*10:01	HLA-DQA1*01:01/DQB1*05:01	4928	4923	4979	589	589	600
HLA-DRB1*01:01	HLA-DPA1*02:01/DPB1*10:01	HLA-DQA1*01:01/DQB1*05:02	4928	4923	4979	589	589	600
HLA-DRB1*01:01	HLA-DPA1*02:01/DPB1*10:01	HLA-DQA1*01:01/DQB1*05:03	4928	4923	4979	589	589	600
HLA-DRB1*01:01	HLA-DPA1*02:01/DPB1*10:01	HLA-DQA1*01:01/DQB1*06:01	4928	4923	4979	589	589	600
HLA-DRB1*01:01	HLA-DPA1*02:01/DPB1*10:01	HLA-DQA1*01:01/DQB1*06:02	4928	4923	4979	589	589	600
HLA-DRB1*01:01	HLA-DPA1*02:01/DPB1*10:01	HLA-DQA1*01:01/DQB1*06:04	4928	4923	4979	589	589	600
HLA-DRB1*01:01	HLA-DPA1*02:01/DPB1*10:01	HLA-DQA1*01:02/DQB1*02:01	4928	4923	4979	589	589	600
HLA-DRB1*01:01	HLA-DPA1*02:01/DPB1*10:01	HLA-DQA1*01:02/DQB1*05:01	6083	6079	6135	668	668	678
HLA-DRB1*01:01	HLA-DPA1*02:01/DPB1*10:01	HLA-DQA1*01:02/DQB1*05:02	4928	4923	4979	589	589	600
HLA-DRB1*01:01	HLA-DPA1*02:01/DPB1*10:01	HLA-DQA1*01:02/DQB1*05:03	4938	4933	4989	589	589	600
HLA-DRB1*01:01	HLA-DPA1*02:01/DPB1*10:01	HLA-DQA1*01:02/DQB1*06:01	4961	4956	5012	619	619	630
HLA-DRB1*01:01	HLA-DPA1*02:01/DPB1*10:01	HLA-DQA1*01:02/DQB1*06:02	5097	5093	5149	619	620	631
HLA-DRB1*01:01	HLA-DPA1*02:01/DPB1*10:01	HLA-DQA1*01:02/DQB1*06:03	4928	4923	4979	589	589	600
HLA-DRB1*01:01	HLA-DPA1*02:01/DPB1*10:01	HLA-DQA1*01:02/DQB1*06:04	4928	4923	4979	589	589	600
HLA-DRB1*01:01	HLA-DPA1*02:01/DPB1*10:01	HLA-DQA1*01:02/DQB1*06:09	4928	4923	4979	589	589	600
HLA-DRB1*01:01	HLA-DPA1*02:01/DPB1*10:01	HLA-DQA1*01:03/DQB1*03:03	4928	4923	4979	589	589	600
HLA-DRB1*01:01	HLA-DPA1*02:01/DPB1*10:01	HLA-DQA1*01:03/DQB1*05:02	4928	4923	4979	589	589	600
HLA-DRB1*01:01	HLA-DPA1*02:01/DPB1*10:01	HLA-DQA1*01:03/DQB1*05:03	4928	4923	4979	589	589	600
HLA-DRB1*01:01	HLA-DPA1*02:01/DPB1*10:01	HLA-DQA1*01:03/DQB1*06:01	4961	4956	5012	621	621	632
HLA-DRB1*01:01	HLA-DPA1*02:01/DPB1*10:01	HLA-DQA1*01:03/DQB1*06:02	4968	4963	5019	618	618	629
HLA-DRB1*01:01	HLA-DPA1*02:01/DPB1*10:01	HLA-DQA1*01:03/DQB1*06:03	4928	4923	4979	589	589	600
HLA-DRB1*01:01	HLA-DPA1*02:01/DPB1*10:01	HLA-DQA1*01:03/DQB1*06:09	4928	4923	4979	589	589	600
HLA-DRB1*01:01	HLA-DPA1*02:01/DPB1*10:01	HLA-DQA1*02:01/DQB1*02:01	4928	4923	4979	589	589	600
HLA-DRB1*01:01	HLA-DPA1*02:01/DPB1*10:01	HLA-DQA1*02:01/DQB1*02:02	4928	4923	4979	589	589	600
HLA-DRB1*01:01	HLA-DPA1*02:01/DPB1*10:01	HLA-DQA1*02:01/DQB1*03:03	4930	4925	4981	591	591	602
HLA-DRB1*01:01	HLA-DPA1*02:01/DPB1*10:01	HLA-DQA1*02:01/DQB1*04:02	4928	4923	4979	589	589	600
HLA-DRB1*01:01	HLA-DPA1*02:01/DPB1*10:01	HLA-DQA1*02:01/DQB1*06:04	4928	4923	4979	589	589	600
HLA-DRB1*01:01	HLA-DPA1*02:01/DPB1*10:01	HLA-DQA1*03:01/DQB1*03:02	4928	4923	4979	589	589	600
HLA-DRB1*01:01	HLA-DPA1*02:01/DPB1*10:01	HLA-DQA1*03:01/DQB1*06:01	4928	4923	4979	589	589	600
HLA-DRB1*01:01	HLA-DPA1*02:01/DPB1*10:01	HLA-DQA1*04:01/DQB1*02:01	4928	4923	4979	589	589	600
HLA-DRB1*01:01	HLA-DPA1*02:01/DPB1*10:01	HLA-DQA1*04:01/DQB1*03:01	4934	4929	4985	589	589	600
HLA-DRB1*01:01	HLA-DPA1*02:01/DPB1*10:01	HLA-DQA1*04:01/DQB1*03:02	4928	4923	4979	589	589	600
HLA-DRB1*01:01	HLA-DPA1*02:01/DPB1*10:01	HLA-DQA1*04:01/DQB1*03:03	4928	4923	4979	589	589	600
HLA-DRB1*01:01	HLA-DPA1*02:01/DPB1*10:01	HLA-DQA1*04:01/DQB1*04:02	4928	4923	4979	589	589	600
HLA-DRB1*01:01	HLA-DPA1*02:01/DPB1*10:01	HLA-DQA1*05:01/DQB1*02:01	4928	4923	4979	589	589	600
HLA-DRB1*01:01	HLA-DPA1*02:01/DPB1*10:01	HLA-DQA1*05:01/DQB1*03:01	5238	5233	5289	696	696	707
HLA-DRB1*01:01	HLA-DPA1*02:01/DPB1*10:01	HLA-DQA1*05:01/DQB1*03:02	4928	4923	4979	589	589	600
HLA-DRB1*01:01	HLA-DPA1*02:01/DPB1*10:01	HLA-DQA1*05:01/DQB1*06:01	4928	4923	4979	589	589	600
HLA-DRB1*01:01	HLA-DPA1*02:01/DPB1*10:01	HLA-DQA1*05:01/DQB1*06:02	4928	4923	4979	589	589	600
HLA-DRB1*01:01	HLA-DPA1*02:01/DPB1*10:01	HLA-DQA1*05:01/DQB1*06:03	4928	4923	4979	589	589	600
HLA-DRB1*01:01	HLA-DPA1*02:01/DPB1*10:01	HLA-DQA1*05:01/DQB1*06:04	4928	4923	4979	589	589	600
HLA-DRB1*01:01	HLA-DPA1*02:01/DPB1*10:01	HLA-DQA1*06:01/DQB1*02:01	4928	4923	4979	589	589	600
HLA-DRB1*01:01	HLA-DPA1*02:01/DPB1*10:01	HLA-DQA1*06:01/DQB1*03:01	5010	5005	5061	612	612	623
HLA-DRB1*01:01	HLA-DPA1*02:01/DPB1*10:01	HLA-DQA1*06:01/DQB1*03:03	4928	4923	4979	589	589	600
HLA-DRB1*01:01	HLA-DPA1*02:01/DPB1*10:01	HLA-DQA1*06:01/DQB1*04:02	4928	4923	4979	589	589	600
HLA-DRB1*01:01	HLA-DPA1*02:01/DPB1*10:01	HLA-DQA1*06:01/DQB1*06:01	4928	4923	4979	589	589	600
HLA-DRB1*01:01	HLA-DPA1*02:01/DPB1*10:01	HLA-DQA1*06:01/DQB1*06:03	4928	4923	4979	589	589	600
HLA-DRB1*01:01	HLA-DPA1*02:01/DPB1*11:01	HLA-DQA1*01:01/DQB1*02:01	4928	4923	4979	589	589	600
HLA-DRB1*01:01	HLA-DPA1*02:01/DPB1*11:01	HLA-DQA1*01:01/DQB1*05:01	4928	4923	4979	589	589	600
HLA-DRB1*01:01	HLA-DPA1*02:01/DPB1*11:01	HLA-DQA1*01:01/DQB1*05:02	4928	4923	4979	589	589	600
HLA-DRB1*01:01	HLA-DPA1*02:01/DPB1*11:01	HLA-DQA1*01:01/DQB1*05:03	4928	4923	4979	589	589	600
HLA-DRB1*01:01	HLA-DPA1*02:01/DPB1*11:01	HLA-DQA1*01:01/DQB1*06:01	4928	4923	4979	589	589	600
HLA-DRB1*01:01	HLA-DPA1*02:01/DPB1*11:01	HLA-DQA1*01:01/DQB1*06:02	4928	4923	4979	589	589	600
HLA-DRB1*01:01	HLA-DPA1*02:01/DPB1*11:01	HLA-DQA1*01:01/DQB1*06:04	4928	4923	4979	589	589	600
HLA-DRB1*01:01	HLA-DPA1*02:01/DPB1*11:01	HLA-DQA1*01:02/DQB1*02:01	4928	4923	4979	589	589	600
HLA-DRB1*01:01	HLA-DPA1*02:01/DPB1*11:01	HLA-DQA1*01:02/DQB1*05:01	6083	6079	6135	668	668	678
HLA-DRB1*01:01	HLA-DPA1*02:01/DPB1*11:01	HLA-DQA1*01:02/DQB1*05:02	4928	4923	4979	589	589	600
HLA-DRB1*01:01	HLA-DPA1*02:01/DPB1*11:01	HLA-DQA1*01:02/DQB1*05:03	4938	4933	4989	589	589	600
HLA-DRB1*01:01	HLA-DPA1*02:01/DPB1*11:01	HLA-DQA1*01:02/DQB1*06:01	4961	4956	5012	619	619	630
HLA-DRB1*01:01	HLA-DPA1*02:01/DPB1*11:01	HLA-DQA1*01:02/DQB1*06:02	5097	5093	5149	619	620	631
HLA-DRB1*01:01	HLA-DPA1*02:01/DPB1*11:01	HLA-DQA1*01:02/DQB1*06:03	4928	4923	4979	589	589	600
HLA-DRB1*01:01	HLA-DPA1*02:01/DPB1*11:01	HLA-DQA1*01:02/DQB1*06:04	4928	4923	4979	589	589	600
HLA-DRB1*01:01	HLA-DPA1*02:01/DPB1*11:01	HLA-DQA1*01:02/DQB1*06:09	4928	4923	4979	589	589	600
HLA-DRB1*01:01	HLA-DPA1*02:01/DPB1*11:01	HLA-DQA1*01:03/DQB1*03:03	4928	4923	4979	589	589	600
HLA-DRB1*01:01	HLA-DPA1*02:01/DPB1*11:01	HLA-DQA1*01:03/DQB1*05:02	4928	4923	4979	589	589	600
HLA-DRB1*01:01	HLA-DPA1*02:01/DPB1*11:01	HLA-DQA1*01:03/DQB1*05:03	4928	4923	4979	589	589	600
HLA-DRB1*01:01	HLA-DPA1*02:01/DPB1*11:01	HLA-DQA1*01:03/DQB1*06:01	4961	4956	5012	621	621	632
HLA-DRB1*01:01	HLA-DPA1*02:01/DPB1*11:01	HLA-DQA1*01:03/DQB1*06:02	4968	4963	5019	618	618	629
HLA-DRB1*01:01	HLA-DPA1*02:01/DPB1*11:01	HLA-DQA1*01:03/DQB1*06:03	4928	4923	4979	589	589	600
HLA-DRB1*01:01	HLA-DPA1*02:01/DPB1*11:01	HLA-DQA1*01:03/DQB1*06:09	4928	4923	4979	589	589	600
HLA-DRB1*01:01	HLA-DPA1*02:01/DPB1*11:01	HLA-DQA1*02:01/DQB1*02:01	4928	4923	4979	589	589	600
HLA-DRB1*01:01	HLA-DPA1*02:01/DPB1*11:01	HLA-DQA1*02:01/DQB1*02:02	4928	4923	4979	589	589	600
HLA-DRB1*01:01	HLA-DPA1*02:01/DPB1*11:01	HLA-DQA1*02:01/DQB1*03:03	4930	4925	4981	591	591	602
HLA-DRB1*01:01	HLA-DPA1*02:01/DPB1*11:01	HLA-DQA1*02:01/DQB1*04:02	4928	4923	4979	589	589	600
HLA-DRB1*01:01	HLA-DPA1*02:01/DPB1*11:01	HLA-DQA1*02:01/DQB1*06:04	4928	4923	4979	589	589	600
HLA-DRB1*01:01	HLA-DPA1*02:01/DPB1*11:01	HLA-DQA1*03:01/DQB1*03:02	4928	4923	4979	589	589	600
HLA-DRB1*01:01	HLA-DPA1*02:01/DPB1*11:01	HLA-DQA1*03:01/DQB1*06:01	4928	4923	4979	589	589	600
HLA-DRB1*01:01	HLA-DPA1*02:01/DPB1*11:01	HLA-DQA1*04:01/DQB1*02:01	4928	4923	4979	589	589	600
HLA-DRB1*01:01	HLA-DPA1*02:01/DPB1*11:01	HLA-DQA1*04:01/DQB1*03:01	4934	4929	4985	589	589	600
HLA-DRB1*01:01	HLA-DPA1*02:01/DPB1*11:01	HLA-DQA1*04:01/DQB1*03:02	4928	4923	4979	589	589	600
HLA-DRB1*01:01	HLA-DPA1*02:01/DPB1*11:01	HLA-DQA1*04:01/DQB1*03:03	4928	4923	4979	589	589	600
HLA-DRB1*01:01	HLA-DPA1*02:01/DPB1*11:01	HLA-DQA1*04:01/DQB1*04:02	4928	4923	4979	589	589	600
HLA-DRB1*01:01	HLA-DPA1*02:01/DPB1*11:01	HLA-DQA1*05:01/DQB1*02:01	4928	4923	4979	589	589	600
HLA-DRB1*01:01	HLA-DPA1*02:01/DPB1*11:01	HLA-DQA1*05:01/DQB1*03:01	5238	5233	5289	696	696	707
HLA-DRB1*01:01	HLA-DPA1*02:01/DPB1*11:01	HLA-DQA1*05:01/DQB1*03:02	4928	4923	4979	589	589	600
HLA-DRB1*01:01	HLA-DPA1*02:01/DPB1*11:01	HLA-DQA1*05:01/DQB1*06:01	4928	4923	4979	589	589	600
HLA-DRB1*01:01	HLA-DPA1*02:01/DPB1*11:01	HLA-DQA1*05:01/DQB1*06:02	4928	4923	4979	589	589	600
HLA-DRB1*01:01	HLA-DPA1*02:01/DPB1*11:01	HLA-DQA1*05:01/DQB1*06:03	4928	4923	4979	589	589	600
HLA-DRB1*01:01	HLA-DPA1*02:01/DPB1*11:01	HLA-DQA1*05:01/DQB1*06:04	4928	4923	4979	589	589	600
HLA-DRB1*01:01	HLA-DPA1*02:01/DPB1*11:01	HLA-DQA1*06:01/DQB1*02:01	4928	4923	4979	589	589	600
HLA-DRB1*01:01	HLA-DPA1*02:01/DPB1*11:01	HLA-DQA1*06:01/DQB1*03:01	5010	5005	5061	612	612	623
HLA-DRB1*01:01	HLA-DPA1*02:01/DPB1*11:01	HLA-DQA1*06:01/DQB1*03:03	4928	4923	4979	589	589	600
HLA-DRB1*01:01	HLA-DPA1*02:01/DPB1*11:01	HLA-DQA1*06:01/DQB1*04:02	4928	4923	4979	589	589	600
HLA-DRB1*01:01	HLA-DPA1*02:01/DPB1*11:01	HLA-DQA1*06:01/DQB1*06:01	4928	4923	4979	589	589	600
HLA-DRB1*01:01	HLA-DPA1*02:01/DPB1*11:01	HLA-DQA1*06:01/DQB1*06:03	4928	4923	4979	589	589	600
HLA-DRB1*01:01	HLA-DPA1*02:01/DPB1*13:01	HLA-DQA1*01:01/DQB1*02:01	4945	4940	4996	606	606	617
HLA-DRB1*01:01	HLA-DPA1*02:01/DPB1*13:01	HLA-DQA1*01:01/DQB1*05:01	4945	4940	4996	606	606	617
HLA-DRB1*01:01	HLA-DPA1*02:01/DPB1*13:01	HLA-DQA1*01:01/DQB1*05:02	4945	4940	4996	606	606	617
HLA-DRB1*01:01	HLA-DPA1*02:01/DPB1*13:01	HLA-DQA1*01:01/DQB1*05:03	4945	4940	4996	606	606	617
HLA-DRB1*01:01	HLA-DPA1*02:01/DPB1*13:01	HLA-DQA1*01:01/DQB1*06:01	4945	4940	4996	606	606	617
HLA-DRB1*01:01	HLA-DPA1*02:01/DPB1*13:01	HLA-DQA1*01:01/DQB1*06:02	4945	4940	4996	606	606	617
HLA-DRB1*01:01	HLA-DPA1*02:01/DPB1*13:01	HLA-DQA1*01:01/DQB1*06:04	4945	4940	4996	606	606	617
HLA-DRB1*01:01	HLA-DPA1*02:01/DPB1*13:01	HLA-DQA1*01:02/DQB1*02:01	4945	4940	4996	606	606	617
HLA-DRB1*01:01	HLA-DPA1*02:01/DPB1*13:01	HLA-DQA1*01:02/DQB1*05:01	6100	6096	6152	685	685	695
HLA-DRB1*01:01	HLA-DPA1*02:01/DPB1*13:01	HLA-DQA1*01:02/DQB1*05:02	4945	4940	4996	606	606	617
HLA-DRB1*01:01	HLA-DPA1*02:01/DPB1*13:01	HLA-DQA1*01:02/DQB1*05:03	4955	4950	5006	606	606	617
HLA-DRB1*01:01	HLA-DPA1*02:01/DPB1*13:01	HLA-DQA1*01:02/DQB1*06:01	4978	4973	5029	636	636	647
HLA-DRB1*01:01	HLA-DPA1*02:01/DPB1*13:01	HLA-DQA1*01:02/DQB1*06:02	5114	5110	5166	636	637	648
HLA-DRB1*01:01	HLA-DPA1*02:01/DPB1*13:01	HLA-DQA1*01:02/DQB1*06:03	4945	4940	4996	606	606	617
HLA-DRB1*01:01	HLA-DPA1*02:01/DPB1*13:01	HLA-DQA1*01:02/DQB1*06:04	4945	4940	4996	606	606	617
HLA-DRB1*01:01	HLA-DPA1*02:01/DPB1*13:01	HLA-DQA1*01:02/DQB1*06:09	4945	4940	4996	606	606	617
HLA-DRB1*01:01	HLA-DPA1*02:01/DPB1*13:01	HLA-DQA1*01:03/DQB1*03:03	4945	4940	4996	606	606	617
HLA-DRB1*01:01	HLA-DPA1*02:01/DPB1*13:01	HLA-DQA1*01:03/DQB1*05:02	4945	4940	4996	606	606	617
HLA-DRB1*01:01	HLA-DPA1*02:01/DPB1*13:01	HLA-DQA1*01:03/DQB1*05:03	4945	4940	4996	606	606	617
HLA-DRB1*01:01	HLA-DPA1*02:01/DPB1*13:01	HLA-DQA1*01:03/DQB1*06:01	4978	4973	5029	638	638	649
HLA-DRB1*01:01	HLA-DPA1*02:01/DPB1*13:01	HLA-DQA1*01:03/DQB1*06:02	4985	4980	5036	635	635	646
HLA-DRB1*01:01	HLA-DPA1*02:01/DPB1*13:01	HLA-DQA1*01:03/DQB1*06:03	4945	4940	4996	606	606	617
HLA-DRB1*01:01	HLA-DPA1*02:01/DPB1*13:01	HLA-DQA1*01:03/DQB1*06:09	4945	4940	4996	606	606	617
HLA-DRB1*01:01	HLA-DPA1*02:01/DPB1*13:01	HLA-DQA1*02:01/DQB1*02:01	4945	4940	4996	606	606	617
HLA-DRB1*01:01	HLA-DPA1*02:01/DPB1*13:01	HLA-DQA1*02:01/DQB1*02:02	4945	4940	4996	606	606	617
HLA-DRB1*01:01	HLA-DPA1*02:01/DPB1*13:01	HLA-DQA1*02:01/DQB1*03:03	4947	4942	4998	608	608	619
HLA-DRB1*01:01	HLA-DPA1*02:01/DPB1*13:01	HLA-DQA1*02:01/DQB1*04:02	4945	4940	4996	606	606	617
HLA-DRB1*01:01	HLA-DPA1*02:01/DPB1*13:01	HLA-DQA1*02:01/DQB1*06:04	4945	4940	4996	606	606	617
HLA-DRB1*01:01	HLA-DPA1*02:01/DPB1*13:01	HLA-DQA1*03:01/DQB1*03:02	4945	4940	4996	606	606	617
HLA-DRB1*01:01	HLA-DPA1*02:01/DPB1*13:01	HLA-DQA1*03:01/DQB1*06:01	4945	4940	4996	606	606	617
HLA-DRB1*01:01	HLA-DPA1*02:01/DPB1*13:01	HLA-DQA1*04:01/DQB1*02:01	4945	4940	4996	606	606	617
HLA-DRB1*01:01	HLA-DPA1*02:01/DPB1*13:01	HLA-DQA1*04:01/DQB1*03:01	4951	4946	5002	606	606	617
HLA-DRB1*01:01	HLA-DPA1*02:01/DPB1*13:01	HLA-DQA1*04:01/DQB1*03:02	4945	4940	4996	606	606	617
HLA-DRB1*01:01	HLA-DPA1*02:01/DPB1*13:01	HLA-DQA1*04:01/DQB1*03:03	4945	4940	4996	606	606	617
HLA-DRB1*01:01	HLA-DPA1*02:01/DPB1*13:01	HLA-DQA1*04:01/DQB1*04:02	4945	4940	4996	606	606	617
HLA-DRB1*01:01	HLA-DPA1*02:01/DPB1*13:01	HLA-DQA1*05:01/DQB1*02:01	4945	4940	4996	606	606	617
HLA-DRB1*01:01	HLA-DPA1*02:01/DPB1*13:01	HLA-DQA1*05:01/DQB1*03:01	5255	5250	5306	713	713	724
HLA-DRB1*01:01	HLA-DPA1*02:01/DPB1*13:01	HLA-DQA1*05:01/DQB1*03:02	4945	4940	4996	606	606	617
HLA-DRB1*01:01	HLA-DPA1*02:01/DPB1*13:01	HLA-DQA1*05:01/DQB1*06:01	4945	4940	4996	606	606	617
HLA-DRB1*01:01	HLA-DPA1*02:01/DPB1*13:01	HLA-DQA1*05:01/DQB1*06:02	4945	4940	4996	606	606	617
HLA-DRB1*01:01	HLA-DPA1*02:01/DPB1*13:01	HLA-DQA1*05:01/DQB1*06:03	4945	4940	4996	606	606	617
HLA-DRB1*01:01	HLA-DPA1*02:01/DPB1*13:01	HLA-DQA1*05:01/DQB1*06:04	4945	4940	4996	606	606	617
HLA-DRB1*01:01	HLA-DPA1*02:01/DPB1*13:01	HLA-DQA1*06:01/DQB1*02:01	4945	4940	4996	606	606	617
HLA-DRB1*01:01	HLA-DPA1*02:01/DPB1*13:01	HLA-DQA1*06:01/DQB1*03:01	5027	5022	5078	629	629	640
HLA-DRB1*01:01	HLA-DPA1*02:01/DPB1*13:01	HLA-DQA1*06:01/DQB1*03:03	4945	4940	4996	606	606	617
HLA-DRB1*01:01	HLA-DPA1*02:01/DPB1*13:01	HLA-DQA1*06:01/DQB1*04:02	4945	4940	4996	606	606	617
HLA-DRB1*01:01	HLA-DPA1*02:01/DPB1*13:01	HLA-DQA1*06:01/DQB1*06:01	4945	4940	4996	606	606	617
HLA-DRB1*01:01	HLA-DPA1*02:01/DPB1*13:01	HLA-DQA1*06:01/DQB1*06:03	4945	4940	4996	606	606	617
HLA-DRB1*01:01	HLA-DPA1*02:01/DPB1*14:01	HLA-DQA1*01:01/DQB1*02:01	4928	4923	4979	589	589	600
HLA-DRB1*01:01	HLA-DPA1*02:01/DPB1*14:01	HLA-DQA1*01:01/DQB1*05:01	4928	4923	4979	589	589	600
HLA-DRB1*01:01	HLA-DPA1*02:01/DPB1*14:01	HLA-DQA1*01:01/DQB1*05:02	4928	4923	4979	589	589	600
HLA-DRB1*01:01	HLA-DPA1*02:01/DPB1*14:01	HLA-DQA1*01:01/DQB1*05:03	4928	4923	4979	589	589	600
HLA-DRB1*01:01	HLA-DPA1*02:01/DPB1*14:01	HLA-DQA1*01:01/DQB1*06:01	4928	4923	4979	589	589	600
HLA-DRB1*01:01	HLA-DPA1*02:01/DPB1*14:01	HLA-DQA1*01:01/DQB1*06:02	4928	4923	4979	589	589	600
HLA-DRB1*01:01	HLA-DPA1*02:01/DPB1*14:01	HLA-DQA1*01:01/DQB1*06:04	4928	4923	4979	589	589	600
HLA-DRB1*01:01	HLA-DPA1*02:01/DPB1*14:01	HLA-DQA1*01:02/DQB1*02:01	4928	4923	4979	589	589	600
HLA-DRB1*01:01	HLA-DPA1*02:01/DPB1*14:01	HLA-DQA1*01:02/DQB1*05:01	6083	6079	6135	668	668	678
HLA-DRB1*01:01	HLA-DPA1*02:01/DPB1*14:01	HLA-DQA1*01:02/DQB1*05:02	4928	4923	4979	589	589	600
HLA-DRB1*01:01	HLA-DPA1*02:01/DPB1*14:01	HLA-DQA1*01:02/DQB1*05:03	4938	4933	4989	589	589	600
HLA-DRB1*01:01	HLA-DPA1*02:01/DPB1*14:01	HLA-DQA1*01:02/DQB1*06:01	4961	4956	5012	619	619	630
HLA-DRB1*01:01	HLA-DPA1*02:01/DPB1*14:01	HLA-DQA1*01:02/DQB1*06:02	5097	5093	5149	619	620	631
HLA-DRB1*01:01	HLA-DPA1*02:01/DPB1*14:01	HLA-DQA1*01:02/DQB1*06:03	4928	4923	4979	589	589	600
HLA-DRB1*01:01	HLA-DPA1*02:01/DPB1*14:01	HLA-DQA1*01:02/DQB1*06:04	4928	4923	4979	589	589	600
HLA-DRB1*01:01	HLA-DPA1*02:01/DPB1*14:01	HLA-DQA1*01:02/DQB1*06:09	4928	4923	4979	589	589	600
HLA-DRB1*01:01	HLA-DPA1*02:01/DPB1*14:01	HLA-DQA1*01:03/DQB1*03:03	4928	4923	4979	589	589	600
HLA-DRB1*01:01	HLA-DPA1*02:01/DPB1*14:01	HLA-DQA1*01:03/DQB1*05:02	4928	4923	4979	589	589	600
HLA-DRB1*01:01	HLA-DPA1*02:01/DPB1*14:01	HLA-DQA1*01:03/DQB1*05:03	4928	4923	4979	589	589	600
HLA-DRB1*01:01	HLA-DPA1*02:01/DPB1*14:01	HLA-DQA1*01:03/DQB1*06:01	4961	4956	5012	621	621	632
HLA-DRB1*01:01	HLA-DPA1*02:01/DPB1*14:01	HLA-DQA1*01:03/DQB1*06:02	4968	4963	5019	618	618	629
HLA-DRB1*01:01	HLA-DPA1*02:01/DPB1*14:01	HLA-DQA1*01:03/DQB1*06:03	4928	4923	4979	589	589	600
HLA-DRB1*01:01	HLA-DPA1*02:01/DPB1*14:01	HLA-DQA1*01:03/DQB1*06:09	4928	4923	4979	589	589	600
HLA-DRB1*01:01	HLA-DPA1*02:01/DPB1*14:01	HLA-DQA1*02:01/DQB1*02:01	4928	4923	4979	589	589	600
HLA-DRB1*01:01	HLA-DPA1*02:01/DPB1*14:01	HLA-DQA1*02:01/DQB1*02:02	4928	4923	4979	589	589	600
HLA-DRB1*01:01	HLA-DPA1*02:01/DPB1*14:01	HLA-DQA1*02:01/DQB1*03:03	4930	4925	4981	591	591	602
HLA-DRB1*01:01	HLA-DPA1*02:01/DPB1*14:01	HLA-DQA1*02:01/DQB1*04:02	4928	4923	4979	589	589	600
HLA-DRB1*01:01	HLA-DPA1*02:01/DPB1*14:01	HLA-DQA1*02:01/DQB1*06:04	4928	4923	4979	589	589	600
HLA-DRB1*01:01	HLA-DPA1*02:01/DPB1*14:01	HLA-DQA1*03:01/DQB1*03:02	4928	4923	4979	589	589	600
HLA-DRB1*01:01	HLA-DPA1*02:01/DPB1*14:01	HLA-DQA1*03:01/DQB1*06:01	4928	4923	4979	589	589	600
HLA-DRB1*01:01	HLA-DPA1*02:01/DPB1*14:01	HLA-DQA1*04:01/DQB1*02:01	4928	4923	4979	589	589	600
HLA-DRB1*01:01	HLA-DPA1*02:01/DPB1*14:01	HLA-DQA1*04:01/DQB1*03:01	4934	4929	4985	589	589	600
HLA-DRB1*01:01	HLA-DPA1*02:01/DPB1*14:01	HLA-DQA1*04:01/DQB1*03:02	4928	4923	4979	589	589	600
HLA-DRB1*01:01	HLA-DPA1*02:01/DPB1*14:01	HLA-DQA1*04:01/DQB1*03:03	4928	4923	4979	589	589	600
HLA-DRB1*01:01	HLA-DPA1*02:01/DPB1*14:01	HLA-DQA1*04:01/DQB1*04:02	4928	4923	4979	589	589	600
HLA-DRB1*01:01	HLA-DPA1*02:01/DPB1*14:01	HLA-DQA1*05:01/DQB1*02:01	4928	4923	4979	589	589	600
HLA-DRB1*01:01	HLA-DPA1*02:01/DPB1*14:01	HLA-DQA1*05:01/DQB1*03:01	5238	5233	5289	696	696	707
HLA-DRB1*01:01	HLA-DPA1*02:01/DPB1*14:01	HLA-DQA1*05:01/DQB1*03:02	4928	4923	4979	589	589	600
HLA-DRB1*01:01	HLA-DPA1*02:01/DPB1*14:01	HLA-DQA1*05:01/DQB1*06:01	4928	4923	4979	589	589	600
HLA-DRB1*01:01	HLA-DPA1*02:01/DPB1*14:01	HLA-DQA1*05:01/DQB1*06:02	4928	4923	4979	589	589	600
HLA-DRB1*01:01	HLA-DPA1*02:01/DPB1*14:01	HLA-DQA1*05:01/DQB1*06:03	4928	4923	4979	589	589	600
HLA-DRB1*01:01	HLA-DPA1*02:01/DPB1*14:01	HLA-DQA1*05:01/DQB1*06:04	4928	4923	4979	589	589	600
HLA-DRB1*01:01	HLA-DPA1*02:01/DPB1*14:01	HLA-DQA1*06:01/DQB1*02:01	4928	4923	4979	589	589	600
HLA-DRB1*01:01	HLA-DPA1*02:01/DPB1*14:01	HLA-DQA1*06:01/DQB1*03:01	5010	5005	5061	612	612	623
HLA-DRB1*01:01	HLA-DPA1*02:01/DPB1*14:01	HLA-DQA1*06:01/DQB1*03:03	4928	4923	4979	589	589	600
HLA-DRB1*01:01	HLA-DPA1*02:01/DPB1*14:01	HLA-DQA1*06:01/DQB1*04:02	4928	4923	4979	589	589	600
HLA-DRB1*01:01	HLA-DPA1*02:01/DPB1*14:01	HLA-DQA1*06:01/DQB1*06:01	4928	4923	4979	589	589	600
HLA-DRB1*01:01	HLA-DPA1*02:01/DPB1*14:01	HLA-DQA1*06:01/DQB1*06:03	4928	4923	4979	589	589	600
HLA-DRB1*01:01	HLA-DPA1*02:01/DPB1*17:01	HLA-DQA1*01:01/DQB1*02:01	4928	4923	4979	589	589	600
HLA-DRB1*01:01	HLA-DPA1*02:01/DPB1*17:01	HLA-DQA1*01:01/DQB1*05:01	4928	4923	4979	589	589	600
HLA-DRB1*01:01	HLA-DPA1*02:01/DPB1*17:01	HLA-DQA1*01:01/DQB1*05:02	4928	4923	4979	589	589	600
HLA-DRB1*01:01	HLA-DPA1*02:01/DPB1*17:01	HLA-DQA1*01:01/DQB1*05:03	4928	4923	4979	589	589	600
HLA-DRB1*01:01	HLA-DPA1*02:01/DPB1*17:01	HLA-DQA1*01:01/DQB1*06:01	4928	4923	4979	589	589	600
HLA-DRB1*01:01	HLA-DPA1*02:01/DPB1*17:01	HLA-DQA1*01:01/DQB1*06:02	4928	4923	4979	589	589	600
HLA-DRB1*01:01	HLA-DPA1*02:01/DPB1*17:01	HLA-DQA1*01:01/DQB1*06:04	4928	4923	4979	589	589	600
HLA-DRB1*01:01	HLA-DPA1*02:01/DPB1*17:01	HLA-DQA1*01:02/DQB1*02:01	4928	4923	4979	589	589	600
HLA-DRB1*01:01	HLA-DPA1*02:01/DPB1*17:01	HLA-DQA1*01:02/DQB1*05:01	6083	6079	6135	668	668	678
HLA-DRB1*01:01	HLA-DPA1*02:01/DPB1*17:01	HLA-DQA1*01:02/DQB1*05:02	4928	4923	4979	589	589	600
HLA-DRB1*01:01	HLA-DPA1*02:01/DPB1*17:01	HLA-DQA1*01:02/DQB1*05:03	4938	4933	4989	589	589	600
HLA-DRB1*01:01	HLA-DPA1*02:01/DPB1*17:01	HLA-DQA1*01:02/DQB1*06:01	4961	4956	5012	619	619	630
HLA-DRB1*01:01	HLA-DPA1*02:01/DPB1*17:01	HLA-DQA1*01:02/DQB1*06:02	5097	5093	5149	619	620	631
HLA-DRB1*01:01	HLA-DPA1*02:01/DPB1*17:01	HLA-DQA1*01:02/DQB1*06:03	4928	4923	4979	589	589	600
HLA-DRB1*01:01	HLA-DPA1*02:01/DPB1*17:01	HLA-DQA1*01:02/DQB1*06:04	4928	4923	4979	589	589	600
HLA-DRB1*01:01	HLA-DPA1*02:01/DPB1*17:01	HLA-DQA1*01:02/DQB1*06:09	4928	4923	4979	589	589	600
HLA-DRB1*01:01	HLA-DPA1*02:01/DPB1*17:01	HLA-DQA1*01:03/DQB1*03:03	4928	4923	4979	589	589	600
HLA-DRB1*01:01	HLA-DPA1*02:01/DPB1*17:01	HLA-DQA1*01:03/DQB1*05:02	4928	4923	4979	589	589	600
HLA-DRB1*01:01	HLA-DPA1*02:01/DPB1*17:01	HLA-DQA1*01:03/DQB1*05:03	4928	4923	4979	589	589	600
HLA-DRB1*01:01	HLA-DPA1*02:01/DPB1*17:01	HLA-DQA1*01:03/DQB1*06:01	4961	4956	5012	621	621	632
HLA-DRB1*01:01	HLA-DPA1*02:01/DPB1*17:01	HLA-DQA1*01:03/DQB1*06:02	4968	4963	5019	618	618	629
HLA-DRB1*01:01	HLA-DPA1*02:01/DPB1*17:01	HLA-DQA1*01:03/DQB1*06:03	4928	4923	4979	589	589	600
HLA-DRB1*01:01	HLA-DPA1*02:01/DPB1*17:01	HLA-DQA1*01:03/DQB1*06:09	4928	4923	4979	589	589	600
HLA-DRB1*01:01	HLA-DPA1*02:01/DPB1*17:01	HLA-DQA1*02:01/DQB1*02:01	4928	4923	4979	589	589	600
HLA-DRB1*01:01	HLA-DPA1*02:01/DPB1*17:01	HLA-DQA1*02:01/DQB1*02:02	4928	4923	4979	589	589	600
HLA-DRB1*01:01	HLA-DPA1*02:01/DPB1*17:01	HLA-DQA1*02:01/DQB1*03:03	4930	4925	4981	591	591	602
HLA-DRB1*01:01	HLA-DPA1*02:01/DPB1*17:01	HLA-DQA1*02:01/DQB1*04:02	4928	4923	4979	589	589	600
HLA-DRB1*01:01	HLA-DPA1*02:01/DPB1*17:01	HLA-DQA1*02:01/DQB1*06:04	4928	4923	4979	589	589	600
HLA-DRB1*01:01	HLA-DPA1*02:01/DPB1*17:01	HLA-DQA1*03:01/DQB1*03:02	4928	4923	4979	589	589	600
HLA-DRB1*01:01	HLA-DPA1*02:01/DPB1*17:01	HLA-DQA1*03:01/DQB1*06:01	4928	4923	4979	589	589	600
HLA-DRB1*01:01	HLA-DPA1*02:01/DPB1*17:01	HLA-DQA1*04:01/DQB1*02:01	4928	4923	4979	589	589	600
HLA-DRB1*01:01	HLA-DPA1*02:01/DPB1*17:01	HLA-DQA1*04:01/DQB1*03:01	4934	4929	4985	589	589	600
HLA-DRB1*01:01	HLA-DPA1*02:01/DPB1*17:01	HLA-DQA1*04:01/DQB1*03:02	4928	4923	4979	589	589	600
HLA-DRB1*01:01	HLA-DPA1*02:01/DPB1*17:01	HLA-DQA1*04:01/DQB1*03:03	4928	4923	4979	589	589	600
HLA-DRB1*01:01	HLA-DPA1*02:01/DPB1*17:01	HLA-DQA1*04:01/DQB1*04:02	4928	4923	4979	589	589	600
HLA-DRB1*01:01	HLA-DPA1*02:01/DPB1*17:01	HLA-DQA1*05:01/DQB1*02:01	4928	4923	4979	589	589	600
HLA-DRB1*01:01	HLA-DPA1*02:01/DPB1*17:01	HLA-DQA1*05:01/DQB1*03:01	5238	5233	5289	696	696	707
HLA-DRB1*01:01	HLA-DPA1*02:01/DPB1*17:01	HLA-DQA1*05:01/DQB1*03:02	4928	4923	4979	589	589	600
HLA-DRB1*01:01	HLA-DPA1*02:01/DPB1*17:01	HLA-DQA1*05:01/DQB1*06:01	4928	4923	4979	589	589	600
HLA-DRB1*01:01	HLA-DPA1*02:01/DPB1*17:01	HLA-DQA1*05:01/DQB1*06:02	4928	4923	4979	589	589	600
HLA-DRB1*01:01	HLA-DPA1*02:01/DPB1*17:01	HLA-DQA1*05:01/DQB1*06:03	4928	4923	4979	589	589	600
HLA-DRB1*01:01	HLA-DPA1*02:01/DPB1*17:01	HLA-DQA1*05:01/DQB1*06:04	4928	4923	4979	589	589	600
HLA-DRB1*01:01	HLA-DPA1*02:01/DPB1*17:01	HLA-DQA1*06:01/DQB1*02:01	4928	4923	4979	589	589	600
HLA-DRB1*01:01	HLA-DPA1*02:01/DPB1*17:01	HLA-DQA1*06:01/DQB1*03:01	5010	5005	5061	612	612	623
HLA-DRB1*01:01	HLA-DPA1*02:01/DPB1*17:01	HLA-DQA1*06:01/DQB1*03:03	4928	4923	4979	589	589	600
HLA-DRB1*01:01	HLA-DPA1*02:01/DPB1*17:01	HLA-DQA1*06:01/DQB1*04:02	4928	4923	4979	589	589	600
HLA-DRB1*01:01	HLA-DPA1*02:01/DPB1*17:01	HLA-DQA1*06:01/DQB1*06:01	4928	4923	4979	589	589	600
HLA-DRB1*01:01	HLA-DPA1*02:01/DPB1*17:01	HLA-DQA1*06:01/DQB1*06:03	4928	4923	4979	589	589	600
HLA-DRB1*01:01	HLA-DPA1*02:01/DPB1*26:01	HLA-DQA1*01:01/DQB1*02:01	4928	4923	4979	589	589	600
HLA-DRB1*01:01	HLA-DPA1*02:01/DPB1*26:01	HLA-DQA1*01:01/DQB1*05:01	4928	4923	4979	589	589	600
HLA-DRB1*01:01	HLA-DPA1*02:01/DPB1*26:01	HLA-DQA1*01:01/DQB1*05:02	4928	4923	4979	589	589	600
HLA-DRB1*01:01	HLA-DPA1*02:01/DPB1*26:01	HLA-DQA1*01:01/DQB1*05:03	4928	4923	4979	589	589	600
HLA-DRB1*01:01	HLA-DPA1*02:01/DPB1*26:01	HLA-DQA1*01:01/DQB1*06:01	4928	4923	4979	589	589	600
HLA-DRB1*01:01	HLA-DPA1*02:01/DPB1*26:01	HLA-DQA1*01:01/DQB1*06:02	4928	4923	4979	589	589	600
HLA-DRB1*01:01	HLA-DPA1*02:01/DPB1*26:01	HLA-DQA1*01:01/DQB1*06:04	4928	4923	4979	589	589	600
HLA-DRB1*01:01	HLA-DPA1*02:01/DPB1*26:01	HLA-DQA1*01:02/DQB1*02:01	4928	4923	4979	589	589	600
HLA-DRB1*01:01	HLA-DPA1*02:01/DPB1*26:01	HLA-DQA1*01:02/DQB1*05:01	6083	6079	6135	668	668	678
HLA-DRB1*01:01	HLA-DPA1*02:01/DPB1*26:01	HLA-DQA1*01:02/DQB1*05:02	4928	4923	4979	589	589	600
HLA-DRB1*01:01	HLA-DPA1*02:01/DPB1*26:01	HLA-DQA1*01:02/DQB1*05:03	4938	4933	4989	589	589	600
HLA-DRB1*01:01	HLA-DPA1*02:01/DPB1*26:01	HLA-DQA1*01:02/DQB1*06:01	4961	4956	5012	619	619	630
HLA-DRB1*01:01	HLA-DPA1*02:01/DPB1*26:01	HLA-DQA1*01:02/DQB1*06:02	5097	5093	5149	619	620	631
HLA-DRB1*01:01	HLA-DPA1*02:01/DPB1*26:01	HLA-DQA1*01:02/DQB1*06:03	4928	4923	4979	589	589	600
HLA-DRB1*01:01	HLA-DPA1*02:01/DPB1*26:01	HLA-DQA1*01:02/DQB1*06:04	4928	4923	4979	589	589	600
HLA-DRB1*01:01	HLA-DPA1*02:01/DPB1*26:01	HLA-DQA1*01:02/DQB1*06:09	4928	4923	4979	589	589	600
HLA-DRB1*01:01	HLA-DPA1*02:01/DPB1*26:01	HLA-DQA1*01:03/DQB1*03:03	4928	4923	4979	589	589	600
HLA-DRB1*01:01	HLA-DPA1*02:01/DPB1*26:01	HLA-DQA1*01:03/DQB1*05:02	4928	4923	4979	589	589	600
HLA-DRB1*01:01	HLA-DPA1*02:01/DPB1*26:01	HLA-DQA1*01:03/DQB1*05:03	4928	4923	4979	589	589	600
HLA-DRB1*01:01	HLA-DPA1*02:01/DPB1*26:01	HLA-DQA1*01:03/DQB1*06:01	4961	4956	5012	621	621	632
HLA-DRB1*01:01	HLA-DPA1*02:01/DPB1*26:01	HLA-DQA1*01:03/DQB1*06:02	4968	4963	5019	618	618	629
HLA-DRB1*01:01	HLA-DPA1*02:01/DPB1*26:01	HLA-DQA1*01:03/DQB1*06:03	4928	4923	4979	589	589	600
HLA-DRB1*01:01	HLA-DPA1*02:01/DPB1*26:01	HLA-DQA1*01:03/DQB1*06:09	4928	4923	4979	589	589	600
HLA-DRB1*01:01	HLA-DPA1*02:01/DPB1*26:01	HLA-DQA1*02:01/DQB1*02:01	4928	4923	4979	589	589	600
HLA-DRB1*01:01	HLA-DPA1*02:01/DPB1*26:01	HLA-DQA1*02:01/DQB1*02:02	4928	4923	4979	589	589	600
HLA-DRB1*01:01	HLA-DPA1*02:01/DPB1*26:01	HLA-DQA1*02:01/DQB1*03:03	4930	4925	4981	591	591	602
HLA-DRB1*01:01	HLA-DPA1*02:01/DPB1*26:01	HLA-DQA1*02:01/DQB1*04:02	4928	4923	4979	589	589	600
HLA-DRB1*01:01	HLA-DPA1*02:01/DPB1*26:01	HLA-DQA1*02:01/DQB1*06:04	4928	4923	4979	589	589	600
HLA-DRB1*01:01	HLA-DPA1*02:01/DPB1*26:01	HLA-DQA1*03:01/DQB1*03:02	4928	4923	4979	589	589	600
HLA-DRB1*01:01	HLA-DPA1*02:01/DPB1*26:01	HLA-DQA1*03:01/DQB1*06:01	4928	4923	4979	589	589	600
HLA-DRB1*01:01	HLA-DPA1*02:01/DPB1*26:01	HLA-DQA1*04:01/DQB1*02:01	4928	4923	4979	589	589	600
HLA-DRB1*01:01	HLA-DPA1*02:01/DPB1*26:01	HLA-DQA1*04:01/DQB1*03:01	4934	4929	4985	589	589	600
HLA-DRB1*01:01	HLA-DPA1*02:01/DPB1*26:01	HLA-DQA1*04:01/DQB1*03:02	4928	4923	4979	589	589	600
HLA-DRB1*01:01	HLA-DPA1*02:01/DPB1*26:01	HLA-DQA1*04:01/DQB1*03:03	4928	4923	4979	589	589	600
HLA-DRB1*01:01	HLA-DPA1*02:01/DPB1*26:01	HLA-DQA1*04:01/DQB1*04:02	4928	4923	4979	589	589	600
HLA-DRB1*01:01	HLA-DPA1*02:01/DPB1*26:01	HLA-DQA1*05:01/DQB1*02:01	4928	4923	4979	589	589	600
HLA-DRB1*01:01	HLA-DPA1*02:01/DPB1*26:01	HLA-DQA1*05:01/DQB1*03:01	5238	5233	5289	696	696	707
HLA-DRB1*01:01	HLA-DPA1*02:01/DPB1*26:01	HLA-DQA1*05:01/DQB1*03:02	4928	4923	4979	589	589	600
HLA-DRB1*01:01	HLA-DPA1*02:01/DPB1*26:01	HLA-DQA1*05:01/DQB1*06:01	4928	4923	4979	589	589	600
HLA-DRB1*01:01	HLA-DPA1*02:01/DPB1*26:01	HLA-DQA1*05:01/DQB1*06:02	4928	4923	4979	589	589	600
HLA-DRB1*01:01	HLA-DPA1*02:01/DPB1*26:01	HLA-DQA1*05:01/DQB1*06:03	4928	4923	4979	589	589	600
HLA-DRB1*01:01	HLA-DPA1*02:01/DPB1*26:01	HLA-DQA1*05:01/DQB1*06:04	4928	4923	4979	589	589	600
HLA-DRB1*01:01	HLA-DPA1*02:01/DPB1*26:01	HLA-DQA1*06:01/DQB1*02:01	4928	4923	4979	589	589	600
HLA-DRB1*01:01	HLA-DPA1*02:01/DPB1*26:01	HLA-DQA1*06:01/DQB1*03:01	5010	5005	5061	612	612	623
HLA-DRB1*01:01	HLA-DPA1*02:01/DPB1*26:01	HLA-DQA1*06:01/DQB1*03:03	4928	4923	4979	589	589	600
HLA-DRB1*01:01	HLA-DPA1*02:01/DPB1*26:01	HLA-DQA1*06:01/DQB1*04:02	4928	4923	4979	589	589	600
HLA-DRB1*01:01	HLA-DPA1*02:01/DPB1*26:01	HLA-DQA1*06:01/DQB1*06:01	4928	4923	4979	589	589	600
HLA-DRB1*01:01	HLA-DPA1*02:01/DPB1*26:01	HLA-DQA1*06:01/DQB1*06:03	4928	4923	4979	589	589	600
HLA-DRB1*01:01	HLA-DPA1*02:02/DPB1*01:01	HLA-DQA1*01:01/DQB1*02:01	5145	5140	5196	635	635	646
HLA-DRB1*01:01	HLA-DPA1*02:02/DPB1*01:01	HLA-DQA1*01:01/DQB1*05:01	5145	5140	5196	635	635	646
HLA-DRB1*01:01	HLA-DPA1*02:02/DPB1*01:01	HLA-DQA1*01:01/DQB1*05:02	5145	5140	5196	635	635	646
HLA-DRB1*01:01	HLA-DPA1*02:02/DPB1*01:01	HLA-DQA1*01:01/DQB1*05:03	5145	5140	5196	635	635	646
HLA-DRB1*01:01	HLA-DPA1*02:02/DPB1*01:01	HLA-DQA1*01:01/DQB1*06:01	5145	5140	5196	635	635	646
HLA-DRB1*01:01	HLA-DPA1*02:02/DPB1*01:01	HLA-DQA1*01:01/DQB1*06:02	5145	5140	5196	635	635	646
HLA-DRB1*01:01	HLA-DPA1*02:02/DPB1*01:01	HLA-DQA1*01:01/DQB1*06:04	5145	5140	5196	635	635	646
HLA-DRB1*01:01	HLA-DPA1*02:02/DPB1*01:01	HLA-DQA1*01:02/DQB1*02:01	5145	5140	5196	635	635	646
HLA-DRB1*01:01	HLA-DPA1*02:02/DPB1*01:01	HLA-DQA1*01:02/DQB1*05:01	6290	6286	6342	714	714	724
HLA-DRB1*01:01	HLA-DPA1*02:02/DPB1*01:01	HLA-DQA1*01:02/DQB1*05:02	5145	5140	5196	635	635	646
HLA-DRB1*01:01	HLA-DPA1*02:02/DPB1*01:01	HLA-DQA1*01:02/DQB1*05:03	5155	5150	5206	635	635	646
HLA-DRB1*01:01	HLA-DPA1*02:02/DPB1*01:01	HLA-DQA1*01:02/DQB1*06:01	5178	5173	5229	665	665	676
HLA-DRB1*01:01	HLA-DPA1*02:02/DPB1*01:01	HLA-DQA1*01:02/DQB1*06:02	5314	5310	5366	665	666	677
HLA-DRB1*01:01	HLA-DPA1*02:02/DPB1*01:01	HLA-DQA1*01:02/DQB1*06:03	5145	5140	5196	635	635	646
HLA-DRB1*01:01	HLA-DPA1*02:02/DPB1*01:01	HLA-DQA1*01:02/DQB1*06:04	5145	5140	5196	635	635	646
HLA-DRB1*01:01	HLA-DPA1*02:02/DPB1*01:01	HLA-DQA1*01:02/DQB1*06:09	5145	5140	5196	635	635	646
HLA-DRB1*01:01	HLA-DPA1*02:02/DPB1*01:01	HLA-DQA1*01:03/DQB1*03:03	5145	5140	5196	635	635	646
HLA-DRB1*01:01	HLA-DPA1*02:02/DPB1*01:01	HLA-DQA1*01:03/DQB1*05:02	5145	5140	5196	635	635	646
HLA-DRB1*01:01	HLA-DPA1*02:02/DPB1*01:01	HLA-DQA1*01:03/DQB1*05:03	5145	5140	5196	635	635	646
HLA-DRB1*01:01	HLA-DPA1*02:02/DPB1*01:01	HLA-DQA1*01:03/DQB1*06:01	5178	5173	5229	667	667	678
HLA-DRB1*01:01	HLA-DPA1*02:02/DPB1*01:01	HLA-DQA1*01:03/DQB1*06:02	5185	5180	5236	664	664	675
HLA-DRB1*01:01	HLA-DPA1*02:02/DPB1*01:01	HLA-DQA1*01:03/DQB1*06:03	5145	5140	5196	635	635	646
HLA-DRB1*01:01	HLA-DPA1*02:02/DPB1*01:01	HLA-DQA1*01:03/DQB1*06:09	5145	5140	5196	635	635	646
HLA-DRB1*01:01	HLA-DPA1*02:02/DPB1*01:01	HLA-DQA1*02:01/DQB1*02:01	5145	5140	5196	635	635	646
HLA-DRB1*01:01	HLA-DPA1*02:02/DPB1*01:01	HLA-DQA1*02:01/DQB1*02:02	5145	5140	5196	635	635	646
HLA-DRB1*01:01	HLA-DPA1*02:02/DPB1*01:01	HLA-DQA1*02:01/DQB1*03:03	5147	5142	5198	637	637	648
HLA-DRB1*01:01	HLA-DPA1*02:02/DPB1*01:01	HLA-DQA1*02:01/DQB1*04:02	5145	5140	5196	635	635	646
HLA-DRB1*01:01	HLA-DPA1*02:02/DPB1*01:01	HLA-DQA1*02:01/DQB1*06:04	5145	5140	5196	635	635	646
HLA-DRB1*01:01	HLA-DPA1*02:02/DPB1*01:01	HLA-DQA1*03:01/DQB1*03:02	5145	5140	5196	635	635	646
HLA-DRB1*01:01	HLA-DPA1*02:02/DPB1*01:01	HLA-DQA1*03:01/DQB1*06:01	5145	5140	5196	635	635	646
HLA-DRB1*01:01	HLA-DPA1*02:02/DPB1*01:01	HLA-DQA1*04:01/DQB1*02:01	5145	5140	5196	635	635	646
HLA-DRB1*01:01	HLA-DPA1*02:02/DPB1*01:01	HLA-DQA1*04:01/DQB1*03:01	5151	5146	5202	635	635	646
HLA-DRB1*01:01	HLA-DPA1*02:02/DPB1*01:01	HLA-DQA1*04:01/DQB1*03:02	5145	5140	5196	635	635	646
HLA-DRB1*01:01	HLA-DPA1*02:02/DPB1*01:01	HLA-DQA1*04:01/DQB1*03:03	5145	5140	5196	635	635	646
HLA-DRB1*01:01	HLA-DPA1*02:02/DPB1*01:01	HLA-DQA1*04:01/DQB1*04:02	5145	5140	5196	635	635	646
HLA-DRB1*01:01	HLA-DPA1*02:02/DPB1*01:01	HLA-DQA1*05:01/DQB1*02:01	5145	5140	5196	635	635	646
HLA-DRB1*01:01	HLA-DPA1*02:02/DPB1*01:01	HLA-DQA1*05:01/DQB1*03:01	5455	5450	5506	742	742	753
HLA-DRB1*01:01	HLA-DPA1*02:02/DPB1*01:01	HLA-DQA1*05:01/DQB1*03:02	5145	5140	5196	635	635	646
HLA-DRB1*01:01	HLA-DPA1*02:02/DPB1*01:01	HLA-DQA1*05:01/DQB1*06:01	5145	5140	5196	635	635	646
HLA-DRB1*01:01	HLA-DPA1*02:02/DPB1*01:01	HLA-DQA1*05:01/DQB1*06:02	5145	5140	5196	635	635	646
HLA-DRB1*01:01	HLA-DPA1*02:02/DPB1*01:01	HLA-DQA1*05:01/DQB1*06:03	5145	5140	5196	635	635	646
HLA-DRB1*01:01	HLA-DPA1*02:02/DPB1*01:01	HLA-DQA1*05:01/DQB1*06:04	5145	5140	5196	635	635	646
HLA-DRB1*01:01	HLA-DPA1*02:02/DPB1*01:01	HLA-DQA1*06:01/DQB1*02:01	5145	5140	5196	635	635	646
HLA-DRB1*01:01	HLA-DPA1*02:02/DPB1*01:01	HLA-DQA1*06:01/DQB1*03:01	5227	5222	5278	658	658	669
HLA-DRB1*01:01	HLA-DPA1*02:02/DPB1*01:01	HLA-DQA1*06:01/DQB1*03:03	5145	5140	5196	635	635	646
HLA-DRB1*01:01	HLA-DPA1*02:02/DPB1*01:01	HLA-DQA1*06:01/DQB1*04:02	5145	5140	5196	635	635	646
HLA-DRB1*01:01	HLA-DPA1*02:02/DPB1*01:01	HLA-DQA1*06:01/DQB1*06:01	5145	5140	5196	635	635	646
HLA-DRB1*01:01	HLA-DPA1*02:02/DPB1*01:01	HLA-DQA1*06:01/DQB1*06:03	5145	5140	5196	635	635	646
HLA-DRB1*01:01	HLA-DPA1*02:02/DPB1*02:01	HLA-DQA1*01:01/DQB1*02:01	4959	4954	5010	615	615	626
HLA-DRB1*01:01	HLA-DPA1*02:02/DPB1*02:01	HLA-DQA1*01:01/DQB1*05:01	4959	4954	5010	615	615	626
HLA-DRB1*01:01	HLA-DPA1*02:02/DPB1*02:01	HLA-DQA1*01:01/DQB1*05:02	4959	4954	5010	615	615	626
HLA-DRB1*01:01	HLA-DPA1*02:02/DPB1*02:01	HLA-DQA1*01:01/DQB1*05:03	4959	4954	5010	615	615	626
HLA-DRB1*01:01	HLA-DPA1*02:02/DPB1*02:01	HLA-DQA1*01:01/DQB1*06:01	4959	4954	5010	615	615	626
HLA-DRB1*01:01	HLA-DPA1*02:02/DPB1*02:01	HLA-DQA1*01:01/DQB1*06:02	4959	4954	5010	615	615	626
HLA-DRB1*01:01	HLA-DPA1*02:02/DPB1*02:01	HLA-DQA1*01:01/DQB1*06:04	4959	4954	5010	615	615	626
HLA-DRB1*01:01	HLA-DPA1*02:02/DPB1*02:01	HLA-DQA1*01:02/DQB1*02:01	4959	4954	5010	615	615	626
HLA-DRB1*01:01	HLA-DPA1*02:02/DPB1*02:01	HLA-DQA1*01:02/DQB1*05:01	6114	6110	6166	694	694	704
HLA-DRB1*01:01	HLA-DPA1*02:02/DPB1*02:01	HLA-DQA1*01:02/DQB1*05:02	4959	4954	5010	615	615	626
HLA-DRB1*01:01	HLA-DPA1*02:02/DPB1*02:01	HLA-DQA1*01:02/DQB1*05:03	4969	4964	5020	615	615	626
HLA-DRB1*01:01	HLA-DPA1*02:02/DPB1*02:01	HLA-DQA1*01:02/DQB1*06:01	4992	4987	5043	645	645	656
HLA-DRB1*01:01	HLA-DPA1*02:02/DPB1*02:01	HLA-DQA1*01:02/DQB1*06:02	5128	5124	5180	645	646	657
HLA-DRB1*01:01	HLA-DPA1*02:02/DPB1*02:01	HLA-DQA1*01:02/DQB1*06:03	4959	4954	5010	615	615	626
HLA-DRB1*01:01	HLA-DPA1*02:02/DPB1*02:01	HLA-DQA1*01:02/DQB1*06:04	4959	4954	5010	615	615	626
HLA-DRB1*01:01	HLA-DPA1*02:02/DPB1*02:01	HLA-DQA1*01:02/DQB1*06:09	4959	4954	5010	615	615	626
HLA-DRB1*01:01	HLA-DPA1*02:02/DPB1*02:01	HLA-DQA1*01:03/DQB1*03:03	4959	4954	5010	615	615	626
HLA-DRB1*01:01	HLA-DPA1*02:02/DPB1*02:01	HLA-DQA1*01:03/DQB1*05:02	4959	4954	5010	615	615	626
HLA-DRB1*01:01	HLA-DPA1*02:02/DPB1*02:01	HLA-DQA1*01:03/DQB1*05:03	4959	4954	5010	615	615	626
HLA-DRB1*01:01	HLA-DPA1*02:02/DPB1*02:01	HLA-DQA1*01:03/DQB1*06:01	4992	4987	5043	647	647	658
HLA-DRB1*01:01	HLA-DPA1*02:02/DPB1*02:01	HLA-DQA1*01:03/DQB1*06:02	4999	4994	5050	644	644	655
HLA-DRB1*01:01	HLA-DPA1*02:02/DPB1*02:01	HLA-DQA1*01:03/DQB1*06:03	4959	4954	5010	615	615	626
HLA-DRB1*01:01	HLA-DPA1*02:02/DPB1*02:01	HLA-DQA1*01:03/DQB1*06:09	4959	4954	5010	615	615	626
HLA-DRB1*01:01	HLA-DPA1*02:02/DPB1*02:01	HLA-DQA1*02:01/DQB1*02:01	4959	4954	5010	615	615	626
HLA-DRB1*01:01	HLA-DPA1*02:02/DPB1*02:01	HLA-DQA1*02:01/DQB1*02:02	4959	4954	5010	615	615	626
HLA-DRB1*01:01	HLA-DPA1*02:02/DPB1*02:01	HLA-DQA1*02:01/DQB1*03:03	4961	4956	5012	617	617	628
HLA-DRB1*01:01	HLA-DPA1*02:02/DPB1*02:01	HLA-DQA1*02:01/DQB1*04:02	4959	4954	5010	615	615	626
HLA-DRB1*01:01	HLA-DPA1*02:02/DPB1*02:01	HLA-DQA1*02:01/DQB1*06:04	4959	4954	5010	615	615	626
HLA-DRB1*01:01	HLA-DPA1*02:02/DPB1*02:01	HLA-DQA1*03:01/DQB1*03:02	4959	4954	5010	615	615	626
HLA-DRB1*01:01	HLA-DPA1*02:02/DPB1*02:01	HLA-DQA1*03:01/DQB1*06:01	4959	4954	5010	615	615	626
HLA-DRB1*01:01	HLA-DPA1*02:02/DPB1*02:01	HLA-DQA1*04:01/DQB1*02:01	4959	4954	5010	615	615	626
HLA-DRB1*01:01	HLA-DPA1*02:02/DPB1*02:01	HLA-DQA1*04:01/DQB1*03:01	4965	4960	5016	615	615	626
HLA-DRB1*01:01	HLA-DPA1*02:02/DPB1*02:01	HLA-DQA1*04:01/DQB1*03:02	4959	4954	5010	615	615	626
HLA-DRB1*01:01	HLA-DPA1*02:02/DPB1*02:01	HLA-DQA1*04:01/DQB1*03:03	4959	4954	5010	615	615	626
HLA-DRB1*01:01	HLA-DPA1*02:02/DPB1*02:01	HLA-DQA1*04:01/DQB1*04:02	4959	4954	5010	615	615	626
HLA-DRB1*01:01	HLA-DPA1*02:02/DPB1*02:01	HLA-DQA1*05:01/DQB1*02:01	4959	4954	5010	615	615	626
HLA-DRB1*01:01	HLA-DPA1*02:02/DPB1*02:01	HLA-DQA1*05:01/DQB1*03:01	5269	5264	5320	722	722	733
HLA-DRB1*01:01	HLA-DPA1*02:02/DPB1*02:01	HLA-DQA1*05:01/DQB1*03:02	4959	4954	5010	615	615	626
HLA-DRB1*01:01	HLA-DPA1*02:02/DPB1*02:01	HLA-DQA1*05:01/DQB1*06:01	4959	4954	5010	615	615	626
HLA-DRB1*01:01	HLA-DPA1*02:02/DPB1*02:01	HLA-DQA1*05:01/DQB1*06:02	4959	4954	5010	615	615	626
HLA-DRB1*01:01	HLA-DPA1*02:02/DPB1*02:01	HLA-DQA1*05:01/DQB1*06:03	4959	4954	5010	615	615	626
HLA-DRB1*01:01	HLA-DPA1*02:02/DPB1*02:01	HLA-DQA1*05:01/DQB1*06:04	4959	4954	5010	615	615	626
HLA-DRB1*01:01	HLA-DPA1*02:02/DPB1*02:01	HLA-DQA1*06:01/DQB1*02:01	4959	4954	5010	615	615	626
HLA-DRB1*01:01	HLA-DPA1*02:02/DPB1*02:01	HLA-DQA1*06:01/DQB1*03:01	5041	5036	5092	638	638	649
HLA-DRB1*01:01	HLA-DPA1*02:02/DPB1*02:01	HLA-DQA1*06:01/DQB1*03:03	4959	4954	5010	615	615	626
HLA-DRB1*01:01	HLA-DPA1*02:02/DPB1*02:01	HLA-DQA1*06:01/DQB1*04:02	4959	4954	5010	615	615	626
HLA-DRB1*01:01	HLA-DPA1*02:02/DPB1*02:01	HLA-DQA1*06:01/DQB1*06:01	4959	4954	5010	615	615	626
HLA-DRB1*01:01	HLA-DPA1*02:02/DPB1*02:01	HLA-DQA1*06:01/DQB1*06:03	4959	4954	5010	615	615	626
HLA-DRB1*01:01	HLA-DPA1*02:02/DPB1*03:01	HLA-DQA1*01:01/DQB1*02:01	4928	4923	4979	589	589	600
HLA-DRB1*01:01	HLA-DPA1*02:02/DPB1*03:01	HLA-DQA1*01:01/DQB1*05:01	4928	4923	4979	589	589	600
HLA-DRB1*01:01	HLA-DPA1*02:02/DPB1*03:01	HLA-DQA1*01:01/DQB1*05:02	4928	4923	4979	589	589	600
HLA-DRB1*01:01	HLA-DPA1*02:02/DPB1*03:01	HLA-DQA1*01:01/DQB1*05:03	4928	4923	4979	589	589	600
HLA-DRB1*01:01	HLA-DPA1*02:02/DPB1*03:01	HLA-DQA1*01:01/DQB1*06:01	4928	4923	4979	589	589	600
HLA-DRB1*01:01	HLA-DPA1*02:02/DPB1*03:01	HLA-DQA1*01:01/DQB1*06:02	4928	4923	4979	589	589	600
HLA-DRB1*01:01	HLA-DPA1*02:02/DPB1*03:01	HLA-DQA1*01:01/DQB1*06:04	4928	4923	4979	589	589	600
HLA-DRB1*01:01	HLA-DPA1*02:02/DPB1*03:01	HLA-DQA1*01:02/DQB1*02:01	4928	4923	4979	589	589	600
HLA-DRB1*01:01	HLA-DPA1*02:02/DPB1*03:01	HLA-DQA1*01:02/DQB1*05:01	6083	6079	6135	668	668	678
HLA-DRB1*01:01	HLA-DPA1*02:02/DPB1*03:01	HLA-DQA1*01:02/DQB1*05:02	4928	4923	4979	589	589	600
HLA-DRB1*01:01	HLA-DPA1*02:02/DPB1*03:01	HLA-DQA1*01:02/DQB1*05:03	4938	4933	4989	589	589	600
HLA-DRB1*01:01	HLA-DPA1*02:02/DPB1*03:01	HLA-DQA1*01:02/DQB1*06:01	4961	4956	5012	619	619	630
HLA-DRB1*01:01	HLA-DPA1*02:02/DPB1*03:01	HLA-DQA1*01:02/DQB1*06:02	5097	5093	5149	619	620	631
HLA-DRB1*01:01	HLA-DPA1*02:02/DPB1*03:01	HLA-DQA1*01:02/DQB1*06:03	4928	4923	4979	589	589	600
HLA-DRB1*01:01	HLA-DPA1*02:02/DPB1*03:01	HLA-DQA1*01:02/DQB1*06:04	4928	4923	4979	589	589	600
HLA-DRB1*01:01	HLA-DPA1*02:02/DPB1*03:01	HLA-DQA1*01:02/DQB1*06:09	4928	4923	4979	589	589	600
HLA-DRB1*01:01	HLA-DPA1*02:02/DPB1*03:01	HLA-DQA1*01:03/DQB1*03:03	4928	4923	4979	589	589	600
HLA-DRB1*01:01	HLA-DPA1*02:02/DPB1*03:01	HLA-DQA1*01:03/DQB1*05:02	4928	4923	4979	589	589	600
HLA-DRB1*01:01	HLA-DPA1*02:02/DPB1*03:01	HLA-DQA1*01:03/DQB1*05:03	4928	4923	4979	589	589	600
HLA-DRB1*01:01	HLA-DPA1*02:02/DPB1*03:01	HLA-DQA1*01:03/DQB1*06:01	4961	4956	5012	621	621	632
HLA-DRB1*01:01	HLA-DPA1*02:02/DPB1*03:01	HLA-DQA1*01:03/DQB1*06:02	4968	4963	5019	618	618	629
HLA-DRB1*01:01	HLA-DPA1*02:02/DPB1*03:01	HLA-DQA1*01:03/DQB1*06:03	4928	4923	4979	589	589	600
HLA-DRB1*01:01	HLA-DPA1*02:02/DPB1*03:01	HLA-DQA1*01:03/DQB1*06:09	4928	4923	4979	589	589	600
HLA-DRB1*01:01	HLA-DPA1*02:02/DPB1*03:01	HLA-DQA1*02:01/DQB1*02:01	4928	4923	4979	589	589	600
HLA-DRB1*01:01	HLA-DPA1*02:02/DPB1*03:01	HLA-DQA1*02:01/DQB1*02:02	4928	4923	4979	589	589	600
HLA-DRB1*01:01	HLA-DPA1*02:02/DPB1*03:01	HLA-DQA1*02:01/DQB1*03:03	4930	4925	4981	591	591	602
HLA-DRB1*01:01	HLA-DPA1*02:02/DPB1*03:01	HLA-DQA1*02:01/DQB1*04:02	4928	4923	4979	589	589	600
HLA-DRB1*01:01	HLA-DPA1*02:02/DPB1*03:01	HLA-DQA1*02:01/DQB1*06:04	4928	4923	4979	589	589	600
HLA-DRB1*01:01	HLA-DPA1*02:02/DPB1*03:01	HLA-DQA1*03:01/DQB1*03:02	4928	4923	4979	589	589	600
HLA-DRB1*01:01	HLA-DPA1*02:02/DPB1*03:01	HLA-DQA1*03:01/DQB1*06:01	4928	4923	4979	589	589	600
HLA-DRB1*01:01	HLA-DPA1*02:02/DPB1*03:01	HLA-DQA1*04:01/DQB1*02:01	4928	4923	4979	589	589	600
HLA-DRB1*01:01	HLA-DPA1*02:02/DPB1*03:01	HLA-DQA1*04:01/DQB1*03:01	4934	4929	4985	589	589	600
HLA-DRB1*01:01	HLA-DPA1*02:02/DPB1*03:01	HLA-DQA1*04:01/DQB1*03:02	4928	4923	4979	589	589	600
HLA-DRB1*01:01	HLA-DPA1*02:02/DPB1*03:01	HLA-DQA1*04:01/DQB1*03:03	4928	4923	4979	589	589	600
HLA-DRB1*01:01	HLA-DPA1*02:02/DPB1*03:01	HLA-DQA1*04:01/DQB1*04:02	4928	4923	4979	589	589	600
HLA-DRB1*01:01	HLA-DPA1*02:02/DPB1*03:01	HLA-DQA1*05:01/DQB1*02:01	4928	4923	4979	589	589	600
HLA-DRB1*01:01	HLA-DPA1*02:02/DPB1*03:01	HLA-DQA1*05:01/DQB1*03:01	5238	5233	5289	696	696	707
HLA-DRB1*01:01	HLA-DPA1*02:02/DPB1*03:01	HLA-DQA1*05:01/DQB1*03:02	4928	4923	4979	589	589	600
HLA-DRB1*01:01	HLA-DPA1*02:02/DPB1*03:01	HLA-DQA1*05:01/DQB1*06:01	4928	4923	4979	589	589	600
HLA-DRB1*01:01	HLA-DPA1*02:02/DPB1*03:01	HLA-DQA1*05:01/DQB1*06:02	4928	4923	4979	589	589	600
HLA-DRB1*01:01	HLA-DPA1*02:02/DPB1*03:01	HLA-DQA1*05:01/DQB1*06:03	4928	4923	4979	589	589	600
HLA-DRB1*01:01	HLA-DPA1*02:02/DPB1*03:01	HLA-DQA1*05:01/DQB1*06:04	4928	4923	4979	589	589	600
HLA-DRB1*01:01	HLA-DPA1*02:02/DPB1*03:01	HLA-DQA1*06:01/DQB1*02:01	4928	4923	4979	589	589	600
HLA-DRB1*01:01	HLA-DPA1*02:02/DPB1*03:01	HLA-DQA1*06:01/DQB1*03:01	5010	5005	5061	612	612	623
HLA-DRB1*01:01	HLA-DPA1*02:02/DPB1*03:01	HLA-DQA1*06:01/DQB1*03:03	4928	4923	4979	589	589	600
HLA-DRB1*01:01	HLA-DPA1*02:02/DPB1*03:01	HLA-DQA1*06:01/DQB1*04:02	4928	4923	4979	589	589	600
HLA-DRB1*01:01	HLA-DPA1*02:02/DPB1*03:01	HLA-DQA1*06:01/DQB1*06:01	4928	4923	4979	589	589	600
HLA-DRB1*01:01	HLA-DPA1*02:02/DPB1*03:01	HLA-DQA1*06:01/DQB1*06:03	4928	4923	4979	589	589	600
HLA-DRB1*01:01	HLA-DPA1*02:02/DPB1*04:01	HLA-DQA1*01:01/DQB1*02:01	4951	4946	5002	612	612	623
HLA-DRB1*01:01	HLA-DPA1*02:02/DPB1*04:01	HLA-DQA1*01:01/DQB1*05:01	4951	4946	5002	612	612	623
HLA-DRB1*01:01	HLA-DPA1*02:02/DPB1*04:01	HLA-DQA1*01:01/DQB1*05:02	4951	4946	5002	612	612	623
HLA-DRB1*01:01	HLA-DPA1*02:02/DPB1*04:01	HLA-DQA1*01:01/DQB1*05:03	4951	4946	5002	612	612	623
HLA-DRB1*01:01	HLA-DPA1*02:02/DPB1*04:01	HLA-DQA1*01:01/DQB1*06:01	4951	4946	5002	612	612	623
HLA-DRB1*01:01	HLA-DPA1*02:02/DPB1*04:01	HLA-DQA1*01:01/DQB1*06:02	4951	4946	5002	612	612	623
HLA-DRB1*01:01	HLA-DPA1*02:02/DPB1*04:01	HLA-DQA1*01:01/DQB1*06:04	4951	4946	5002	612	612	623
HLA-DRB1*01:01	HLA-DPA1*02:02/DPB1*04:01	HLA-DQA1*01:02/DQB1*02:01	4951	4946	5002	612	612	623
HLA-DRB1*01:01	HLA-DPA1*02:02/DPB1*04:01	HLA-DQA1*01:02/DQB1*05:01	6106	6102	6158	691	691	701
HLA-DRB1*01:01	HLA-DPA1*02:02/DPB1*04:01	HLA-DQA1*01:02/DQB1*05:02	4951	4946	5002	612	612	623
HLA-DRB1*01:01	HLA-DPA1*02:02/DPB1*04:01	HLA-DQA1*01:02/DQB1*05:03	4961	4956	5012	612	612	623
HLA-DRB1*01:01	HLA-DPA1*02:02/DPB1*04:01	HLA-DQA1*01:02/DQB1*06:01	4984	4979	5035	642	642	653
HLA-DRB1*01:01	HLA-DPA1*02:02/DPB1*04:01	HLA-DQA1*01:02/DQB1*06:02	5120	5116	5172	642	643	654
HLA-DRB1*01:01	HLA-DPA1*02:02/DPB1*04:01	HLA-DQA1*01:02/DQB1*06:03	4951	4946	5002	612	612	623
HLA-DRB1*01:01	HLA-DPA1*02:02/DPB1*04:01	HLA-DQA1*01:02/DQB1*06:04	4951	4946	5002	612	612	623
HLA-DRB1*01:01	HLA-DPA1*02:02/DPB1*04:01	HLA-DQA1*01:02/DQB1*06:09	4951	4946	5002	612	612	623
HLA-DRB1*01:01	HLA-DPA1*02:02/DPB1*04:01	HLA-DQA1*01:03/DQB1*03:03	4951	4946	5002	612	612	623
HLA-DRB1*01:01	HLA-DPA1*02:02/DPB1*04:01	HLA-DQA1*01:03/DQB1*05:02	4951	4946	5002	612	612	623
HLA-DRB1*01:01	HLA-DPA1*02:02/DPB1*04:01	HLA-DQA1*01:03/DQB1*05:03	4951	4946	5002	612	612	623
HLA-DRB1*01:01	HLA-DPA1*02:02/DPB1*04:01	HLA-DQA1*01:03/DQB1*06:01	4984	4979	5035	644	644	655
HLA-DRB1*01:01	HLA-DPA1*02:02/DPB1*04:01	HLA-DQA1*01:03/DQB1*06:02	4991	4986	5042	641	641	652
HLA-DRB1*01:01	HLA-DPA1*02:02/DPB1*04:01	HLA-DQA1*01:03/DQB1*06:03	4951	4946	5002	612	612	623
HLA-DRB1*01:01	HLA-DPA1*02:02/DPB1*04:01	HLA-DQA1*01:03/DQB1*06:09	4951	4946	5002	612	612	623
HLA-DRB1*01:01	HLA-DPA1*02:02/DPB1*04:01	HLA-DQA1*02:01/DQB1*02:01	4951	4946	5002	612	612	623
HLA-DRB1*01:01	HLA-DPA1*02:02/DPB1*04:01	HLA-DQA1*02:01/DQB1*02:02	4951	4946	5002	612	612	623
HLA-DRB1*01:01	HLA-DPA1*02:02/DPB1*04:01	HLA-DQA1*02:01/DQB1*03:03	4953	4948	5004	614	614	625
HLA-DRB1*01:01	HLA-DPA1*02:02/DPB1*04:01	HLA-DQA1*02:01/DQB1*04:02	4951	4946	5002	612	612	623
HLA-DRB1*01:01	HLA-DPA1*02:02/DPB1*04:01	HLA-DQA1*02:01/DQB1*06:04	4951	4946	5002	612	612	623
HLA-DRB1*01:01	HLA-DPA1*02:02/DPB1*04:01	HLA-DQA1*03:01/DQB1*03:02	4951	4946	5002	612	612	623
HLA-DRB1*01:01	HLA-DPA1*02:02/DPB1*04:01	HLA-DQA1*03:01/DQB1*06:01	4951	4946	5002	612	612	623
HLA-DRB1*01:01	HLA-DPA1*02:02/DPB1*04:01	HLA-DQA1*04:01/DQB1*02:01	4951	4946	5002	612	612	623
HLA-DRB1*01:01	HLA-DPA1*02:02/DPB1*04:01	HLA-DQA1*04:01/DQB1*03:01	4957	4952	5008	612	612	623
HLA-DRB1*01:01	HLA-DPA1*02:02/DPB1*04:01	HLA-DQA1*04:01/DQB1*03:02	4951	4946	5002	612	612	623
HLA-DRB1*01:01	HLA-DPA1*02:02/DPB1*04:01	HLA-DQA1*04:01/DQB1*03:03	4951	4946	5002	612	612	623
HLA-DRB1*01:01	HLA-DPA1*02:02/DPB1*04:01	HLA-DQA1*04:01/DQB1*04:02	4951	4946	5002	612	612	623
HLA-DRB1*01:01	HLA-DPA1*02:02/DPB1*04:01	HLA-DQA1*05:01/DQB1*02:01	4951	4946	5002	612	612	623
HLA-DRB1*01:01	HLA-DPA1*02:02/DPB1*04:01	HLA-DQA1*05:01/DQB1*03:01	5261	5256	5312	719	719	730
HLA-DRB1*01:01	HLA-DPA1*02:02/DPB1*04:01	HLA-DQA1*05:01/DQB1*03:02	4951	4946	5002	612	612	623
HLA-DRB1*01:01	HLA-DPA1*02:02/DPB1*04:01	HLA-DQA1*05:01/DQB1*06:01	4951	4946	5002	612	612	623
HLA-DRB1*01:01	HLA-DPA1*02:02/DPB1*04:01	HLA-DQA1*05:01/DQB1*06:02	4951	4946	5002	612	612	623
HLA-DRB1*01:01	HLA-DPA1*02:02/DPB1*04:01	HLA-DQA1*05:01/DQB1*06:03	4951	4946	5002	612	612	623
HLA-DRB1*01:01	HLA-DPA1*02:02/DPB1*04:01	HLA-DQA1*05:01/DQB1*06:04	4951	4946	5002	612	612	623
HLA-DRB1*01:01	HLA-DPA1*02:02/DPB1*04:01	HLA-DQA1*06:01/DQB1*02:01	4951	4946	5002	612	612	623
HLA-DRB1*01:01	HLA-DPA1*02:02/DPB1*04:01	HLA-DQA1*06:01/DQB1*03:01	5033	5028	5084	635	635	646
HLA-DRB1*01:01	HLA-DPA1*02:02/DPB1*04:01	HLA-DQA1*06:01/DQB1*03:03	4951	4946	5002	612	612	623
HLA-DRB1*01:01	HLA-DPA1*02:02/DPB1*04:01	HLA-DQA1*06:01/DQB1*04:02	4951	4946	5002	612	612	623
HLA-DRB1*01:01	HLA-DPA1*02:02/DPB1*04:01	HLA-DQA1*06:01/DQB1*06:01	4951	4946	5002	612	612	623
HLA-DRB1*01:01	HLA-DPA1*02:02/DPB1*04:01	HLA-DQA1*06:01/DQB1*06:03	4951	4946	5002	612	612	623
HLA-DRB1*01:01	HLA-DPA1*02:02/DPB1*04:02	HLA-DQA1*01:01/DQB1*02:01	4928	4923	4979	589	589	600
HLA-DRB1*01:01	HLA-DPA1*02:02/DPB1*04:02	HLA-DQA1*01:01/DQB1*05:01	4928	4923	4979	589	589	600
HLA-DRB1*01:01	HLA-DPA1*02:02/DPB1*04:02	HLA-DQA1*01:01/DQB1*05:02	4928	4923	4979	589	589	600
HLA-DRB1*01:01	HLA-DPA1*02:02/DPB1*04:02	HLA-DQA1*01:01/DQB1*05:03	4928	4923	4979	589	589	600
HLA-DRB1*01:01	HLA-DPA1*02:02/DPB1*04:02	HLA-DQA1*01:01/DQB1*06:01	4928	4923	4979	589	589	600
HLA-DRB1*01:01	HLA-DPA1*02:02/DPB1*04:02	HLA-DQA1*01:01/DQB1*06:02	4928	4923	4979	589	589	600
HLA-DRB1*01:01	HLA-DPA1*02:02/DPB1*04:02	HLA-DQA1*01:01/DQB1*06:04	4928	4923	4979	589	589	600
HLA-DRB1*01:01	HLA-DPA1*02:02/DPB1*04:02	HLA-DQA1*01:02/DQB1*02:01	4928	4923	4979	589	589	600
HLA-DRB1*01:01	HLA-DPA1*02:02/DPB1*04:02	HLA-DQA1*01:02/DQB1*05:01	6083	6079	6135	668	668	678
HLA-DRB1*01:01	HLA-DPA1*02:02/DPB1*04:02	HLA-DQA1*01:02/DQB1*05:02	4928	4923	4979	589	589	600
HLA-DRB1*01:01	HLA-DPA1*02:02/DPB1*04:02	HLA-DQA1*01:02/DQB1*05:03	4938	4933	4989	589	589	600
HLA-DRB1*01:01	HLA-DPA1*02:02/DPB1*04:02	HLA-DQA1*01:02/DQB1*06:01	4961	4956	5012	619	619	630
HLA-DRB1*01:01	HLA-DPA1*02:02/DPB1*04:02	HLA-DQA1*01:02/DQB1*06:02	5097	5093	5149	619	620	631
HLA-DRB1*01:01	HLA-DPA1*02:02/DPB1*04:02	HLA-DQA1*01:02/DQB1*06:03	4928	4923	4979	589	589	600
HLA-DRB1*01:01	HLA-DPA1*02:02/DPB1*04:02	HLA-DQA1*01:02/DQB1*06:04	4928	4923	4979	589	589	600
HLA-DRB1*01:01	HLA-DPA1*02:02/DPB1*04:02	HLA-DQA1*01:02/DQB1*06:09	4928	4923	4979	589	589	600
HLA-DRB1*01:01	HLA-DPA1*02:02/DPB1*04:02	HLA-DQA1*01:03/DQB1*03:03	4928	4923	4979	589	589	600
HLA-DRB1*01:01	HLA-DPA1*02:02/DPB1*04:02	HLA-DQA1*01:03/DQB1*05:02	4928	4923	4979	589	589	600
HLA-DRB1*01:01	HLA-DPA1*02:02/DPB1*04:02	HLA-DQA1*01:03/DQB1*05:03	4928	4923	4979	589	589	600
HLA-DRB1*01:01	HLA-DPA1*02:02/DPB1*04:02	HLA-DQA1*01:03/DQB1*06:01	4961	4956	5012	621	621	632
HLA-DRB1*01:01	HLA-DPA1*02:02/DPB1*04:02	HLA-DQA1*01:03/DQB1*06:02	4968	4963	5019	618	618	629
HLA-DRB1*01:01	HLA-DPA1*02:02/DPB1*04:02	HLA-DQA1*01:03/DQB1*06:03	4928	4923	4979	589	589	600
HLA-DRB1*01:01	HLA-DPA1*02:02/DPB1*04:02	HLA-DQA1*01:03/DQB1*06:09	4928	4923	4979	589	589	600
HLA-DRB1*01:01	HLA-DPA1*02:02/DPB1*04:02	HLA-DQA1*02:01/DQB1*02:01	4928	4923	4979	589	589	600
HLA-DRB1*01:01	HLA-DPA1*02:02/DPB1*04:02	HLA-DQA1*02:01/DQB1*02:02	4928	4923	4979	589	589	600
HLA-DRB1*01:01	HLA-DPA1*02:02/DPB1*04:02	HLA-DQA1*02:01/DQB1*03:03	4930	4925	4981	591	591	602
HLA-DRB1*01:01	HLA-DPA1*02:02/DPB1*04:02	HLA-DQA1*02:01/DQB1*04:02	4928	4923	4979	589	589	600
HLA-DRB1*01:01	HLA-DPA1*02:02/DPB1*04:02	HLA-DQA1*02:01/DQB1*06:04	4928	4923	4979	589	589	600
HLA-DRB1*01:01	HLA-DPA1*02:02/DPB1*04:02	HLA-DQA1*03:01/DQB1*03:02	4928	4923	4979	589	589	600
HLA-DRB1*01:01	HLA-DPA1*02:02/DPB1*04:02	HLA-DQA1*03:01/DQB1*06:01	4928	4923	4979	589	589	600
HLA-DRB1*01:01	HLA-DPA1*02:02/DPB1*04:02	HLA-DQA1*04:01/DQB1*02:01	4928	4923	4979	589	589	600
HLA-DRB1*01:01	HLA-DPA1*02:02/DPB1*04:02	HLA-DQA1*04:01/DQB1*03:01	4934	4929	4985	589	589	600
HLA-DRB1*01:01	HLA-DPA1*02:02/DPB1*04:02	HLA-DQA1*04:01/DQB1*03:02	4928	4923	4979	589	589	600
HLA-DRB1*01:01	HLA-DPA1*02:02/DPB1*04:02	HLA-DQA1*04:01/DQB1*03:03	4928	4923	4979	589	589	600
HLA-DRB1*01:01	HLA-DPA1*02:02/DPB1*04:02	HLA-DQA1*04:01/DQB1*04:02	4928	4923	4979	589	589	600
HLA-DRB1*01:01	HLA-DPA1*02:02/DPB1*04:02	HLA-DQA1*05:01/DQB1*02:01	4928	4923	4979	589	589	600
HLA-DRB1*01:01	HLA-DPA1*02:02/DPB1*04:02	HLA-DQA1*05:01/DQB1*03:01	5238	5233	5289	696	696	707
HLA-DRB1*01:01	HLA-DPA1*02:02/DPB1*04:02	HLA-DQA1*05:01/DQB1*03:02	4928	4923	4979	589	589	600
HLA-DRB1*01:01	HLA-DPA1*02:02/DPB1*04:02	HLA-DQA1*05:01/DQB1*06:01	4928	4923	4979	589	589	600
HLA-DRB1*01:01	HLA-DPA1*02:02/DPB1*04:02	HLA-DQA1*05:01/DQB1*06:02	4928	4923	4979	589	589	600
HLA-DRB1*01:01	HLA-DPA1*02:02/DPB1*04:02	HLA-DQA1*05:01/DQB1*06:03	4928	4923	4979	589	589	600
HLA-DRB1*01:01	HLA-DPA1*02:02/DPB1*04:02	HLA-DQA1*05:01/DQB1*06:04	4928	4923	4979	589	589	600
HLA-DRB1*01:01	HLA-DPA1*02:02/DPB1*04:02	HLA-DQA1*06:01/DQB1*02:01	4928	4923	4979	589	589	600
HLA-DRB1*01:01	HLA-DPA1*02:02/DPB1*04:02	HLA-DQA1*06:01/DQB1*03:01	5010	5005	5061	612	612	623
HLA-DRB1*01:01	HLA-DPA1*02:02/DPB1*04:02	HLA-DQA1*06:01/DQB1*03:03	4928	4923	4979	589	589	600
HLA-DRB1*01:01	HLA-DPA1*02:02/DPB1*04:02	HLA-DQA1*06:01/DQB1*04:02	4928	4923	4979	589	589	600
HLA-DRB1*01:01	HLA-DPA1*02:02/DPB1*04:02	HLA-DQA1*06:01/DQB1*06:01	4928	4923	4979	589	589	600
HLA-DRB1*01:01	HLA-DPA1*02:02/DPB1*04:02	HLA-DQA1*06:01/DQB1*06:03	4928	4923	4979	589	589	600
HLA-DRB1*01:01	HLA-DPA1*02:02/DPB1*05:01	HLA-DQA1*01:01/DQB1*02:01	4928	4923	4979	589	589	600
HLA-DRB1*01:01	HLA-DPA1*02:02/DPB1*05:01	HLA-DQA1*01:01/DQB1*05:01	4928	4923	4979	589	589	600
HLA-DRB1*01:01	HLA-DPA1*02:02/DPB1*05:01	HLA-DQA1*01:01/DQB1*05:02	4928	4923	4979	589	589	600
HLA-DRB1*01:01	HLA-DPA1*02:02/DPB1*05:01	HLA-DQA1*01:01/DQB1*05:03	4928	4923	4979	589	589	600
HLA-DRB1*01:01	HLA-DPA1*02:02/DPB1*05:01	HLA-DQA1*01:01/DQB1*06:01	4928	4923	4979	589	589	600
HLA-DRB1*01:01	HLA-DPA1*02:02/DPB1*05:01	HLA-DQA1*01:01/DQB1*06:02	4928	4923	4979	589	589	600
HLA-DRB1*01:01	HLA-DPA1*02:02/DPB1*05:01	HLA-DQA1*01:01/DQB1*06:04	4928	4923	4979	589	589	600
HLA-DRB1*01:01	HLA-DPA1*02:02/DPB1*05:01	HLA-DQA1*01:02/DQB1*02:01	4928	4923	4979	589	589	600
HLA-DRB1*01:01	HLA-DPA1*02:02/DPB1*05:01	HLA-DQA1*01:02/DQB1*05:01	6083	6079	6135	668	668	678
HLA-DRB1*01:01	HLA-DPA1*02:02/DPB1*05:01	HLA-DQA1*01:02/DQB1*05:02	4928	4923	4979	589	589	600
HLA-DRB1*01:01	HLA-DPA1*02:02/DPB1*05:01	HLA-DQA1*01:02/DQB1*05:03	4938	4933	4989	589	589	600
HLA-DRB1*01:01	HLA-DPA1*02:02/DPB1*05:01	HLA-DQA1*01:02/DQB1*06:01	4961	4956	5012	619	619	630
HLA-DRB1*01:01	HLA-DPA1*02:02/DPB1*05:01	HLA-DQA1*01:02/DQB1*06:02	5097	5093	5149	619	620	631
HLA-DRB1*01:01	HLA-DPA1*02:02/DPB1*05:01	HLA-DQA1*01:02/DQB1*06:03	4928	4923	4979	589	589	600
HLA-DRB1*01:01	HLA-DPA1*02:02/DPB1*05:01	HLA-DQA1*01:02/DQB1*06:04	4928	4923	4979	589	589	600
HLA-DRB1*01:01	HLA-DPA1*02:02/DPB1*05:01	HLA-DQA1*01:02/DQB1*06:09	4928	4923	4979	589	589	600
HLA-DRB1*01:01	HLA-DPA1*02:02/DPB1*05:01	HLA-DQA1*01:03/DQB1*03:03	4928	4923	4979	589	589	600
HLA-DRB1*01:01	HLA-DPA1*02:02/DPB1*05:01	HLA-DQA1*01:03/DQB1*05:02	4928	4923	4979	589	589	600
HLA-DRB1*01:01	HLA-DPA1*02:02/DPB1*05:01	HLA-DQA1*01:03/DQB1*05:03	4928	4923	4979	589	589	600
HLA-DRB1*01:01	HLA-DPA1*02:02/DPB1*05:01	HLA-DQA1*01:03/DQB1*06:01	4961	4956	5012	621	621	632
HLA-DRB1*01:01	HLA-DPA1*02:02/DPB1*05:01	HLA-DQA1*01:03/DQB1*06:02	4968	4963	5019	618	618	629
HLA-DRB1*01:01	HLA-DPA1*02:02/DPB1*05:01	HLA-DQA1*01:03/DQB1*06:03	4928	4923	4979	589	589	600
HLA-DRB1*01:01	HLA-DPA1*02:02/DPB1*05:01	HLA-DQA1*01:03/DQB1*06:09	4928	4923	4979	589	589	600
HLA-DRB1*01:01	HLA-DPA1*02:02/DPB1*05:01	HLA-DQA1*02:01/DQB1*02:01	4928	4923	4979	589	589	600
HLA-DRB1*01:01	HLA-DPA1*02:02/DPB1*05:01	HLA-DQA1*02:01/DQB1*02:02	4928	4923	4979	589	589	600
HLA-DRB1*01:01	HLA-DPA1*02:02/DPB1*05:01	HLA-DQA1*02:01/DQB1*03:03	4930	4925	4981	591	591	602
HLA-DRB1*01:01	HLA-DPA1*02:02/DPB1*05:01	HLA-DQA1*02:01/DQB1*04:02	4928	4923	4979	589	589	600
HLA-DRB1*01:01	HLA-DPA1*02:02/DPB1*05:01	HLA-DQA1*02:01/DQB1*06:04	4928	4923	4979	589	589	600
HLA-DRB1*01:01	HLA-DPA1*02:02/DPB1*05:01	HLA-DQA1*03:01/DQB1*03:02	4928	4923	4979	589	589	600
HLA-DRB1*01:01	HLA-DPA1*02:02/DPB1*05:01	HLA-DQA1*03:01/DQB1*06:01	4928	4923	4979	589	589	600
HLA-DRB1*01:01	HLA-DPA1*02:02/DPB1*05:01	HLA-DQA1*04:01/DQB1*02:01	4928	4923	4979	589	589	600
HLA-DRB1*01:01	HLA-DPA1*02:02/DPB1*05:01	HLA-DQA1*04:01/DQB1*03:01	4934	4929	4985	589	589	600
HLA-DRB1*01:01	HLA-DPA1*02:02/DPB1*05:01	HLA-DQA1*04:01/DQB1*03:02	4928	4923	4979	589	589	600
HLA-DRB1*01:01	HLA-DPA1*02:02/DPB1*05:01	HLA-DQA1*04:01/DQB1*03:03	4928	4923	4979	589	589	600
HLA-DRB1*01:01	HLA-DPA1*02:02/DPB1*05:01	HLA-DQA1*04:01/DQB1*04:02	4928	4923	4979	589	589	600
HLA-DRB1*01:01	HLA-DPA1*02:02/DPB1*05:01	HLA-DQA1*05:01/DQB1*02:01	4928	4923	4979	589	589	600
HLA-DRB1*01:01	HLA-DPA1*02:02/DPB1*05:01	HLA-DQA1*05:01/DQB1*03:01	5238	5233	5289	696	696	707
HLA-DRB1*01:01	HLA-DPA1*02:02/DPB1*05:01	HLA-DQA1*05:01/DQB1*03:02	4928	4923	4979	589	589	600
HLA-DRB1*01:01	HLA-DPA1*02:02/DPB1*05:01	HLA-DQA1*05:01/DQB1*06:01	4928	4923	4979	589	589	600
HLA-DRB1*01:01	HLA-DPA1*02:02/DPB1*05:01	HLA-DQA1*05:01/DQB1*06:02	4928	4923	4979	589	589	600
HLA-DRB1*01:01	HLA-DPA1*02:02/DPB1*05:01	HLA-DQA1*05:01/DQB1*06:03	4928	4923	4979	589	589	600
HLA-DRB1*01:01	HLA-DPA1*02:02/DPB1*05:01	HLA-DQA1*05:01/DQB1*06:04	4928	4923	4979	589	589	600
HLA-DRB1*01:01	HLA-DPA1*02:02/DPB1*05:01	HLA-DQA1*06:01/DQB1*02:01	4928	4923	4979	589	589	600
HLA-DRB1*01:01	HLA-DPA1*02:02/DPB1*05:01	HLA-DQA1*06:01/DQB1*03:01	5010	5005	5061	612	612	623
HLA-DRB1*01:01	HLA-DPA1*02:02/DPB1*05:01	HLA-DQA1*06:01/DQB1*03:03	4928	4923	4979	589	589	600
HLA-DRB1*01:01	HLA-DPA1*02:02/DPB1*05:01	HLA-DQA1*06:01/DQB1*04:02	4928	4923	4979	589	589	600
HLA-DRB1*01:01	HLA-DPA1*02:02/DPB1*05:01	HLA-DQA1*06:01/DQB1*06:01	4928	4923	4979	589	589	600
HLA-DRB1*01:01	HLA-DPA1*02:02/DPB1*05:01	HLA-DQA1*06:01/DQB1*06:03	4928	4923	4979	589	589	600
HLA-DRB1*01:01	HLA-DPA1*02:02/DPB1*14:01	HLA-DQA1*01:01/DQB1*02:01	4928	4923	4979	589	589	600
HLA-DRB1*01:01	HLA-DPA1*02:02/DPB1*14:01	HLA-DQA1*01:01/DQB1*05:01	4928	4923	4979	589	589	600
HLA-DRB1*01:01	HLA-DPA1*02:02/DPB1*14:01	HLA-DQA1*01:01/DQB1*05:02	4928	4923	4979	589	589	600
HLA-DRB1*01:01	HLA-DPA1*02:02/DPB1*14:01	HLA-DQA1*01:01/DQB1*05:03	4928	4923	4979	589	589	600
HLA-DRB1*01:01	HLA-DPA1*02:02/DPB1*14:01	HLA-DQA1*01:01/DQB1*06:01	4928	4923	4979	589	589	600
HLA-DRB1*01:01	HLA-DPA1*02:02/DPB1*14:01	HLA-DQA1*01:01/DQB1*06:02	4928	4923	4979	589	589	600
HLA-DRB1*01:01	HLA-DPA1*02:02/DPB1*14:01	HLA-DQA1*01:01/DQB1*06:04	4928	4923	4979	589	589	600
HLA-DRB1*01:01	HLA-DPA1*02:02/DPB1*14:01	HLA-DQA1*01:02/DQB1*02:01	4928	4923	4979	589	589	600
HLA-DRB1*01:01	HLA-DPA1*02:02/DPB1*14:01	HLA-DQA1*01:02/DQB1*05:01	6083	6079	6135	668	668	678
HLA-DRB1*01:01	HLA-DPA1*02:02/DPB1*14:01	HLA-DQA1*01:02/DQB1*05:02	4928	4923	4979	589	589	600
HLA-DRB1*01:01	HLA-DPA1*02:02/DPB1*14:01	HLA-DQA1*01:02/DQB1*05:03	4938	4933	4989	589	589	600
HLA-DRB1*01:01	HLA-DPA1*02:02/DPB1*14:01	HLA-DQA1*01:02/DQB1*06:01	4961	4956	5012	619	619	630
HLA-DRB1*01:01	HLA-DPA1*02:02/DPB1*14:01	HLA-DQA1*01:02/DQB1*06:02	5097	5093	5149	619	620	631
HLA-DRB1*01:01	HLA-DPA1*02:02/DPB1*14:01	HLA-DQA1*01:02/DQB1*06:03	4928	4923	4979	589	589	600
HLA-DRB1*01:01	HLA-DPA1*02:02/DPB1*14:01	HLA-DQA1*01:02/DQB1*06:04	4928	4923	4979	589	589	600
HLA-DRB1*01:01	HLA-DPA1*02:02/DPB1*14:01	HLA-DQA1*01:02/DQB1*06:09	4928	4923	4979	589	589	600
HLA-DRB1*01:01	HLA-DPA1*02:02/DPB1*14:01	HLA-DQA1*01:03/DQB1*03:03	4928	4923	4979	589	589	600
HLA-DRB1*01:01	HLA-DPA1*02:02/DPB1*14:01	HLA-DQA1*01:03/DQB1*05:02	4928	4923	4979	589	589	600
HLA-DRB1*01:01	HLA-DPA1*02:02/DPB1*14:01	HLA-DQA1*01:03/DQB1*05:03	4928	4923	4979	589	589	600
HLA-DRB1*01:01	HLA-DPA1*02:02/DPB1*14:01	HLA-DQA1*01:03/DQB1*06:01	4961	4956	5012	621	621	632
HLA-DRB1*01:01	HLA-DPA1*02:02/DPB1*14:01	HLA-DQA1*01:03/DQB1*06:02	4968	4963	5019	618	618	629
HLA-DRB1*01:01	HLA-DPA1*02:02/DPB1*14:01	HLA-DQA1*01:03/DQB1*06:03	4928	4923	4979	589	589	600
HLA-DRB1*01:01	HLA-DPA1*02:02/DPB1*14:01	HLA-DQA1*01:03/DQB1*06:09	4928	4923	4979	589	589	600
HLA-DRB1*01:01	HLA-DPA1*02:02/DPB1*14:01	HLA-DQA1*02:01/DQB1*02:01	4928	4923	4979	589	589	600
HLA-DRB1*01:01	HLA-DPA1*02:02/DPB1*14:01	HLA-DQA1*02:01/DQB1*02:02	4928	4923	4979	589	589	600
HLA-DRB1*01:01	HLA-DPA1*02:02/DPB1*14:01	HLA-DQA1*02:01/DQB1*03:03	4930	4925	4981	591	591	602
HLA-DRB1*01:01	HLA-DPA1*02:02/DPB1*14:01	HLA-DQA1*02:01/DQB1*04:02	4928	4923	4979	589	589	600
HLA-DRB1*01:01	HLA-DPA1*02:02/DPB1*14:01	HLA-DQA1*02:01/DQB1*06:04	4928	4923	4979	589	589	600
HLA-DRB1*01:01	HLA-DPA1*02:02/DPB1*14:01	HLA-DQA1*03:01/DQB1*03:02	4928	4923	4979	589	589	600
HLA-DRB1*01:01	HLA-DPA1*02:02/DPB1*14:01	HLA-DQA1*03:01/DQB1*06:01	4928	4923	4979	589	589	600
HLA-DRB1*01:01	HLA-DPA1*02:02/DPB1*14:01	HLA-DQA1*04:01/DQB1*02:01	4928	4923	4979	589	589	600
HLA-DRB1*01:01	HLA-DPA1*02:02/DPB1*14:01	HLA-DQA1*04:01/DQB1*03:01	4934	4929	4985	589	589	600
HLA-DRB1*01:01	HLA-DPA1*02:02/DPB1*14:01	HLA-DQA1*04:01/DQB1*03:02	4928	4923	4979	589	589	600
HLA-DRB1*01:01	HLA-DPA1*02:02/DPB1*14:01	HLA-DQA1*04:01/DQB1*03:03	4928	4923	4979	589	589	600
HLA-DRB1*01:01	HLA-DPA1*02:02/DPB1*14:01	HLA-DQA1*04:01/DQB1*04:02	4928	4923	4979	589	589	600
HLA-DRB1*01:01	HLA-DPA1*02:02/DPB1*14:01	HLA-DQA1*05:01/DQB1*02:01	4928	4923	4979	589	589	600
HLA-DRB1*01:01	HLA-DPA1*02:02/DPB1*14:01	HLA-DQA1*05:01/DQB1*03:01	5238	5233	5289	696	696	707
HLA-DRB1*01:01	HLA-DPA1*02:02/DPB1*14:01	HLA-DQA1*05:01/DQB1*03:02	4928	4923	4979	589	589	600
HLA-DRB1*01:01	HLA-DPA1*02:02/DPB1*14:01	HLA-DQA1*05:01/DQB1*06:01	4928	4923	4979	589	589	600
HLA-DRB1*01:01	HLA-DPA1*02:02/DPB1*14:01	HLA-DQA1*05:01/DQB1*06:02	4928	4923	4979	589	589	600
HLA-DRB1*01:01	HLA-DPA1*02:02/DPB1*14:01	HLA-DQA1*05:01/DQB1*06:03	4928	4923	4979	589	589	600
HLA-DRB1*01:01	HLA-DPA1*02:02/DPB1*14:01	HLA-DQA1*05:01/DQB1*06:04	4928	4923	4979	589	589	600
HLA-DRB1*01:01	HLA-DPA1*02:02/DPB1*14:01	HLA-DQA1*06:01/DQB1*02:01	4928	4923	4979	589	589	600
HLA-DRB1*01:01	HLA-DPA1*02:02/DPB1*14:01	HLA-DQA1*06:01/DQB1*03:01	5010	5005	5061	612	612	623
HLA-DRB1*01:01	HLA-DPA1*02:02/DPB1*14:01	HLA-DQA1*06:01/DQB1*03:03	4928	4923	4979	589	589	600
HLA-DRB1*01:01	HLA-DPA1*02:02/DPB1*14:01	HLA-DQA1*06:01/DQB1*04:02	4928	4923	4979	589	589	600
HLA-DRB1*01:01	HLA-DPA1*02:02/DPB1*14:01	HLA-DQA1*06:01/DQB1*06:01	4928	4923	4979	589	589	600
HLA-DRB1*01:01	HLA-DPA1*02:02/DPB1*14:01	HLA-DQA1*06:01/DQB1*06:03	4928	4923	4979	589	589	600
HLA-DRB1*01:01	HLA-DPA1*03:01/DPB1*01:01	HLA-DQA1*01:01/DQB1*02:01	6099	6105	6151	765	765	776
HLA-DRB1*01:01	HLA-DPA1*03:01/DPB1*01:01	HLA-DQA1*01:01/DQB1*05:01	6099	6105	6151	765	765	776
HLA-DRB1*01:01	HLA-DPA1*03:01/DPB1*01:01	HLA-DQA1*01:01/DQB1*05:02	6099	6105	6151	765	765	776
HLA-DRB1*01:01	HLA-DPA1*03:01/DPB1*01:01	HLA-DQA1*01:01/DQB1*05:03	6099	6105	6151	765	765	776
HLA-DRB1*01:01	HLA-DPA1*03:01/DPB1*01:01	HLA-DQA1*01:01/DQB1*06:01	6099	6105	6151	765	765	776
HLA-DRB1*01:01	HLA-DPA1*03:01/DPB1*01:01	HLA-DQA1*01:01/DQB1*06:02	6099	6105	6151	765	765	776
HLA-DRB1*01:01	HLA-DPA1*03:01/DPB1*01:01	HLA-DQA1*01:01/DQB1*06:04	6099	6105	6151	765	765	776
HLA-DRB1*01:01	HLA-DPA1*03:01/DPB1*01:01	HLA-DQA1*01:02/DQB1*02:01	6099	6105	6151	765	765	776
HLA-DRB1*01:01	HLA-DPA1*03:01/DPB1*01:01	HLA-DQA1*01:02/DQB1*05:01	6997	7004	7050	842	842	852
HLA-DRB1*01:01	HLA-DPA1*03:01/DPB1*01:01	HLA-DQA1*01:02/DQB1*05:02	6099	6105	6151	765	765	776
HLA-DRB1*01:01	HLA-DPA1*03:01/DPB1*01:01	HLA-DQA1*01:02/DQB1*05:03	6109	6115	6161	765	765	776
HLA-DRB1*01:01	HLA-DPA1*03:01/DPB1*01:01	HLA-DQA1*01:02/DQB1*06:01	6132	6138	6184	795	795	806
HLA-DRB1*01:01	HLA-DPA1*03:01/DPB1*01:01	HLA-DQA1*01:02/DQB1*06:02	6268	6275	6321	795	796	807
HLA-DRB1*01:01	HLA-DPA1*03:01/DPB1*01:01	HLA-DQA1*01:02/DQB1*06:03	6099	6105	6151	765	765	776
HLA-DRB1*01:01	HLA-DPA1*03:01/DPB1*01:01	HLA-DQA1*01:02/DQB1*06:04	6099	6105	6151	765	765	776
HLA-DRB1*01:01	HLA-DPA1*03:01/DPB1*01:01	HLA-DQA1*01:02/DQB1*06:09	6099	6105	6151	765	765	776
HLA-DRB1*01:01	HLA-DPA1*03:01/DPB1*01:01	HLA-DQA1*01:03/DQB1*03:03	6099	6105	6151	765	765	776
HLA-DRB1*01:01	HLA-DPA1*03:01/DPB1*01:01	HLA-DQA1*01:03/DQB1*05:02	6099	6105	6151	765	765	776
HLA-DRB1*01:01	HLA-DPA1*03:01/DPB1*01:01	HLA-DQA1*01:03/DQB1*05:03	6099	6105	6151	765	765	776
HLA-DRB1*01:01	HLA-DPA1*03:01/DPB1*01:01	HLA-DQA1*01:03/DQB1*06:01	6132	6138	6184	797	797	808
HLA-DRB1*01:01	HLA-DPA1*03:01/DPB1*01:01	HLA-DQA1*01:03/DQB1*06:02	6139	6145	6191	794	794	805
HLA-DRB1*01:01	HLA-DPA1*03:01/DPB1*01:01	HLA-DQA1*01:03/DQB1*06:03	6099	6105	6151	765	765	776
HLA-DRB1*01:01	HLA-DPA1*03:01/DPB1*01:01	HLA-DQA1*01:03/DQB1*06:09	6099	6105	6151	765	765	776
HLA-DRB1*01:01	HLA-DPA1*03:01/DPB1*01:01	HLA-DQA1*02:01/DQB1*02:01	6099	6105	6151	765	765	776
HLA-DRB1*01:01	HLA-DPA1*03:01/DPB1*01:01	HLA-DQA1*02:01/DQB1*02:02	6099	6105	6151	765	765	776
HLA-DRB1*01:01	HLA-DPA1*03:01/DPB1*01:01	HLA-DQA1*02:01/DQB1*03:03	6101	6107	6153	767	767	778
HLA-DRB1*01:01	HLA-DPA1*03:01/DPB1*01:01	HLA-DQA1*02:01/DQB1*04:02	6099	6105	6151	765	765	776
HLA-DRB1*01:01	HLA-DPA1*03:01/DPB1*01:01	HLA-DQA1*02:01/DQB1*06:04	6099	6105	6151	765	765	776
HLA-DRB1*01:01	HLA-DPA1*03:01/DPB1*01:01	HLA-DQA1*03:01/DQB1*03:02	6099	6105	6151	765	765	776
HLA-DRB1*01:01	HLA-DPA1*03:01/DPB1*01:01	HLA-DQA1*03:01/DQB1*06:01	6099	6105	6151	765	765	776
HLA-DRB1*01:01	HLA-DPA1*03:01/DPB1*01:01	HLA-DQA1*04:01/DQB1*02:01	6099	6105	6151	765	765	776
HLA-DRB1*01:01	HLA-DPA1*03:01/DPB1*01:01	HLA-DQA1*04:01/DQB1*03:01	6105	6111	6157	765	765	776
HLA-DRB1*01:01	HLA-DPA1*03:01/DPB1*01:01	HLA-DQA1*04:01/DQB1*03:02	6099	6105	6151	765	765	776
HLA-DRB1*01:01	HLA-DPA1*03:01/DPB1*01:01	HLA-DQA1*04:01/DQB1*03:03	6099	6105	6151	765	765	776
HLA-DRB1*01:01	HLA-DPA1*03:01/DPB1*01:01	HLA-DQA1*04:01/DQB1*04:02	6099	6105	6151	765	765	776
HLA-DRB1*01:01	HLA-DPA1*03:01/DPB1*01:01	HLA-DQA1*05:01/DQB1*02:01	6099	6105	6151	765	765	776
HLA-DRB1*01:01	HLA-DPA1*03:01/DPB1*01:01	HLA-DQA1*05:01/DQB1*03:01	6409	6415	6461	872	872	883
HLA-DRB1*01:01	HLA-DPA1*03:01/DPB1*01:01	HLA-DQA1*05:01/DQB1*03:02	6099	6105	6151	765	765	776
HLA-DRB1*01:01	HLA-DPA1*03:01/DPB1*01:01	HLA-DQA1*05:01/DQB1*06:01	6099	6105	6151	765	765	776
HLA-DRB1*01:01	HLA-DPA1*03:01/DPB1*01:01	HLA-DQA1*05:01/DQB1*06:02	6099	6105	6151	765	765	776
HLA-DRB1*01:01	HLA-DPA1*03:01/DPB1*01:01	HLA-DQA1*05:01/DQB1*06:03	6099	6105	6151	765	765	776
HLA-DRB1*01:01	HLA-DPA1*03:01/DPB1*01:01	HLA-DQA1*05:01/DQB1*06:04	6099	6105	6151	765	765	776
HLA-DRB1*01:01	HLA-DPA1*03:01/DPB1*01:01	HLA-DQA1*06:01/DQB1*02:01	6099	6105	6151	765	765	776
HLA-DRB1*01:01	HLA-DPA1*03:01/DPB1*01:01	HLA-DQA1*06:01/DQB1*03:01	6181	6187	6233	788	788	799
HLA-DRB1*01:01	HLA-DPA1*03:01/DPB1*01:01	HLA-DQA1*06:01/DQB1*03:03	6099	6105	6151	765	765	776
HLA-DRB1*01:01	HLA-DPA1*03:01/DPB1*01:01	HLA-DQA1*06:01/DQB1*04:02	6099	6105	6151	765	765	776
HLA-DRB1*01:01	HLA-DPA1*03:01/DPB1*01:01	HLA-DQA1*06:01/DQB1*06:01	6099	6105	6151	765	765	776
HLA-DRB1*01:01	HLA-DPA1*03:01/DPB1*01:01	HLA-DQA1*06:01/DQB1*06:03	6099	6105	6151	765	765	776
HLA-DRB1*01:01	HLA-DPA1*03:01/DPB1*02:01	HLA-DQA1*01:01/DQB1*02:01	8161	8195	8265	1051	1051	1094
HLA-DRB1*01:01	HLA-DPA1*03:01/DPB1*02:01	HLA-DQA1*01:01/DQB1*05:01	8161	8195	8265	1051	1051	1094
HLA-DRB1*01:01	HLA-DPA1*03:01/DPB1*02:01	HLA-DQA1*01:01/DQB1*05:02	8161	8195	8265	1051	1051	1094
HLA-DRB1*01:01	HLA-DPA1*03:01/DPB1*02:01	HLA-DQA1*01:01/DQB1*05:03	8161	8195	8265	1051	1051	1094
HLA-DRB1*01:01	HLA-DPA1*03:01/DPB1*02:01	HLA-DQA1*01:01/DQB1*06:01	8161	8195	8265	1051	1051	1094
HLA-DRB1*01:01	HLA-DPA1*03:01/DPB1*02:01	HLA-DQA1*01:01/DQB1*06:02	8161	8195	8265	1051	1051	1094
HLA-DRB1*01:01	HLA-DPA1*03:01/DPB1*02:01	HLA-DQA1*01:01/DQB1*06:04	8161	8195	8265	1051	1051	1094
HLA-DRB1*01:01	HLA-DPA1*03:01/DPB1*02:01	HLA-DQA1*01:02/DQB1*02:01	8161	8195	8265	1051	1051	1094
HLA-DRB1*01:01	HLA-DPA1*03:01/DPB1*02:01	HLA-DQA1*01:02/DQB1*05:01	8944	8978	9049	1121	1121	1163
HLA-DRB1*01:01	HLA-DPA1*03:01/DPB1*02:01	HLA-DQA1*01:02/DQB1*05:02	8161	8195	8265	1051	1051	1094
HLA-DRB1*01:01	HLA-DPA1*03:01/DPB1*02:01	HLA-DQA1*01:02/DQB1*05:03	8170	8204	8274	1051	1051	1094
HLA-DRB1*01:01	HLA-DPA1*03:01/DPB1*02:01	HLA-DQA1*01:02/DQB1*06:01	8194	8228	8298	1081	1081	1124
HLA-DRB1*01:01	HLA-DPA1*03:01/DPB1*02:01	HLA-DQA1*01:02/DQB1*06:02	8326	8361	8431	1081	1082	1125
HLA-DRB1*01:01	HLA-DPA1*03:01/DPB1*02:01	HLA-DQA1*01:02/DQB1*06:03	8161	8195	8265	1051	1051	1094
HLA-DRB1*01:01	HLA-DPA1*03:01/DPB1*02:01	HLA-DQA1*01:02/DQB1*06:04	8161	8195	8265	1051	1051	1094
HLA-DRB1*01:01	HLA-DPA1*03:01/DPB1*02:01	HLA-DQA1*01:02/DQB1*06:09	8161	8195	8265	1051	1051	1094
HLA-DRB1*01:01	HLA-DPA1*03:01/DPB1*02:01	HLA-DQA1*01:03/DQB1*03:03	8161	8195	8265	1051	1051	1094
HLA-DRB1*01:01	HLA-DPA1*03:01/DPB1*02:01	HLA-DQA1*01:03/DQB1*05:02	8161	8195	8265	1051	1051	1094
HLA-DRB1*01:01	HLA-DPA1*03:01/DPB1*02:01	HLA-DQA1*01:03/DQB1*05:03	8161	8195	8265	1051	1051	1094
HLA-DRB1*01:01	HLA-DPA1*03:01/DPB1*02:01	HLA-DQA1*01:03/DQB1*06:01	8194	8228	8298	1083	1083	1126
HLA-DRB1*01:01	HLA-DPA1*03:01/DPB1*02:01	HLA-DQA1*01:03/DQB1*06:02	8199	8233	8303	1080	1080	1123
HLA-DRB1*01:01	HLA-DPA1*03:01/DPB1*02:01	HLA-DQA1*01:03/DQB1*06:03	8161	8195	8265	1051	1051	1094
HLA-DRB1*01:01	HLA-DPA1*03:01/DPB1*02:01	HLA-DQA1*01:03/DQB1*06:09	8161	8195	8265	1051	1051	1094
HLA-DRB1*01:01	HLA-DPA1*03:01/DPB1*02:01	HLA-DQA1*02:01/DQB1*02:01	8161	8195	8265	1051	1051	1094
HLA-DRB1*01:01	HLA-DPA1*03:01/DPB1*02:01	HLA-DQA1*02:01/DQB1*02:02	8161	8195	8265	1051	1051	1094
HLA-DRB1*01:01	HLA-DPA1*03:01/DPB1*02:01	HLA-DQA1*02:01/DQB1*03:03	8163	8197	8267	1053	1053	1096
HLA-DRB1*01:01	HLA-DPA1*03:01/DPB1*02:01	HLA-DQA1*02:01/DQB1*04:02	8161	8195	8265	1051	1051	1094
HLA-DRB1*01:01	HLA-DPA1*03:01/DPB1*02:01	HLA-DQA1*02:01/DQB1*06:04	8161	8195	8265	1051	1051	1094
HLA-DRB1*01:01	HLA-DPA1*03:01/DPB1*02:01	HLA-DQA1*03:01/DQB1*03:02	8161	8195	8265	1051	1051	1094
HLA-DRB1*01:01	HLA-DPA1*03:01/DPB1*02:01	HLA-DQA1*03:01/DQB1*06:01	8161	8195	8265	1051	1051	1094
HLA-DRB1*01:01	HLA-DPA1*03:01/DPB1*02:01	HLA-DQA1*04:01/DQB1*02:01	8161	8195	8265	1051	1051	1094
HLA-DRB1*01:01	HLA-DPA1*03:01/DPB1*02:01	HLA-DQA1*04:01/DQB1*03:01	8167	8201	8271	1051	1051	1094
HLA-DRB1*01:01	HLA-DPA1*03:01/DPB1*02:01	HLA-DQA1*04:01/DQB1*03:02	8161	8195	8265	1051	1051	1094
HLA-DRB1*01:01	HLA-DPA1*03:01/DPB1*02:01	HLA-DQA1*04:01/DQB1*03:03	8161	8195	8265	1051	1051	1094
HLA-DRB1*01:01	HLA-DPA1*03:01/DPB1*02:01	HLA-DQA1*04:01/DQB1*04:02	8161	8195	8265	1051	1051	1094
HLA-DRB1*01:01	HLA-DPA1*03:01/DPB1*02:01	HLA-DQA1*05:01/DQB1*02:01	8161	8195	8265	1051	1051	1094
HLA-DRB1*01:01	HLA-DPA1*03:01/DPB1*02:01	HLA-DQA1*05:01/DQB1*03:01	8468	8502	8572	1158	1158	1201
HLA-DRB1*01:01	HLA-DPA1*03:01/DPB1*02:01	HLA-DQA1*05:01/DQB1*03:02	8161	8195	8265	1051	1051	1094
HLA-DRB1*01:01	HLA-DPA1*03:01/DPB1*02:01	HLA-DQA1*05:01/DQB1*06:01	8161	8195	8265	1051	1051	1094
HLA-DRB1*01:01	HLA-DPA1*03:01/DPB1*02:01	HLA-DQA1*05:01/DQB1*06:02	8161	8195	8265	1051	1051	1094
HLA-DRB1*01:01	HLA-DPA1*03:01/DPB1*02:01	HLA-DQA1*05:01/DQB1*06:03	8161	8195	8265	1051	1051	1094
HLA-DRB1*01:01	HLA-DPA1*03:01/DPB1*02:01	HLA-DQA1*05:01/DQB1*06:04	8161	8195	8265	1051	1051	1094
HLA-DRB1*01:01	HLA-DPA1*03:01/DPB1*02:01	HLA-DQA1*06:01/DQB1*02:01	8161	8195	8265	1051	1051	1094
HLA-DRB1*01:01	HLA-DPA1*03:01/DPB1*02:01	HLA-DQA1*06:01/DQB1*03:01	8243	8277	8347	1074	1074	1117
HLA-DRB1*01:01	HLA-DPA1*03:01/DPB1*02:01	HLA-DQA1*06:01/DQB1*03:03	8161	8195	8265	1051	1051	1094
HLA-DRB1*01:01	HLA-DPA1*03:01/DPB1*02:01	HLA-DQA1*06:01/DQB1*04:02	8161	8195	8265	1051	1051	1094
HLA-DRB1*01:01	HLA-DPA1*03:01/DPB1*02:01	HLA-DQA1*06:01/DQB1*06:01	8161	8195	8265	1051	1051	1094
HLA-DRB1*01:01	HLA-DPA1*03:01/DPB1*02:01	HLA-DQA1*06:01/DQB1*06:03	8161	8195	8265	1051	1051	1094
HLA-DRB1*01:01	HLA-DPA1*03:01/DPB1*04:01	HLA-DQA1*01:01/DQB1*02:01	6880	6908	6970	821	821	851
HLA-DRB1*01:01	HLA-DPA1*03:01/DPB1*04:01	HLA-DQA1*01:01/DQB1*05:01	6880	6908	6970	821	821	851
HLA-DRB1*01:01	HLA-DPA1*03:01/DPB1*04:01	HLA-DQA1*01:01/DQB1*05:02	6880	6908	6970	821	821	851
HLA-DRB1*01:01	HLA-DPA1*03:01/DPB1*04:01	HLA-DQA1*01:01/DQB1*05:03	6880	6908	6970	821	821	851
HLA-DRB1*01:01	HLA-DPA1*03:01/DPB1*04:01	HLA-DQA1*01:01/DQB1*06:01	6880	6908	6970	821	821	851
HLA-DRB1*01:01	HLA-DPA1*03:01/DPB1*04:01	HLA-DQA1*01:01/DQB1*06:02	6880	6908	6970	821	821	851
HLA-DRB1*01:01	HLA-DPA1*03:01/DPB1*04:01	HLA-DQA1*01:01/DQB1*06:04	6880	6908	6970	821	821	851
HLA-DRB1*01:01	HLA-DPA1*03:01/DPB1*04:01	HLA-DQA1*01:02/DQB1*02:01	6880	6908	6970	821	821	851
HLA-DRB1*01:01	HLA-DPA1*03:01/DPB1*04:01	HLA-DQA1*01:02/DQB1*05:01	7789	7818	7879	896	896	924
HLA-DRB1*01:01	HLA-DPA1*03:01/DPB1*04:01	HLA-DQA1*01:02/DQB1*05:02	6880	6908	6970	821	821	851
HLA-DRB1*01:01	HLA-DPA1*03:01/DPB1*04:01	HLA-DQA1*01:02/DQB1*05:03	6890	6918	6980	821	821	851
HLA-DRB1*01:01	HLA-DPA1*03:01/DPB1*04:01	HLA-DQA1*01:02/DQB1*06:01	6913	6941	7003	851	851	881
HLA-DRB1*01:01	HLA-DPA1*03:01/DPB1*04:01	HLA-DQA1*01:02/DQB1*06:02	7049	7078	7140	851	852	882
HLA-DRB1*01:01	HLA-DPA1*03:01/DPB1*04:01	HLA-DQA1*01:02/DQB1*06:03	6880	6908	6970	821	821	851
HLA-DRB1*01:01	HLA-DPA1*03:01/DPB1*04:01	HLA-DQA1*01:02/DQB1*06:04	6880	6908	6970	821	821	851
HLA-DRB1*01:01	HLA-DPA1*03:01/DPB1*04:01	HLA-DQA1*01:02/DQB1*06:09	6880	6908	6970	821	821	851
HLA-DRB1*01:01	HLA-DPA1*03:01/DPB1*04:01	HLA-DQA1*01:03/DQB1*03:03	6880	6908	6970	821	821	851
HLA-DRB1*01:01	HLA-DPA1*03:01/DPB1*04:01	HLA-DQA1*01:03/DQB1*05:02	6880	6908	6970	821	821	851
HLA-DRB1*01:01	HLA-DPA1*03:01/DPB1*04:01	HLA-DQA1*01:03/DQB1*05:03	6880	6908	6970	821	821	851
HLA-DRB1*01:01	HLA-DPA1*03:01/DPB1*04:01	HLA-DQA1*01:03/DQB1*06:01	6913	6941	7003	853	853	883
HLA-DRB1*01:01	HLA-DPA1*03:01/DPB1*04:01	HLA-DQA1*01:03/DQB1*06:02	6920	6948	7010	850	850	880
HLA-DRB1*01:01	HLA-DPA1*03:01/DPB1*04:01	HLA-DQA1*01:03/DQB1*06:03	6880	6908	6970	821	821	851
HLA-DRB1*01:01	HLA-DPA1*03:01/DPB1*04:01	HLA-DQA1*01:03/DQB1*06:09	6880	6908	6970	821	821	851
HLA-DRB1*01:01	HLA-DPA1*03:01/DPB1*04:01	HLA-DQA1*02:01/DQB1*02:01	6880	6908	6970	821	821	851
HLA-DRB1*01:01	HLA-DPA1*03:01/DPB1*04:01	HLA-DQA1*02:01/DQB1*02:02	6880	6908	6970	821	821	851
HLA-DRB1*01:01	HLA-DPA1*03:01/DPB1*04:01	HLA-DQA1*02:01/DQB1*03:03	6882	6910	6972	823	823	853
HLA-DRB1*01:01	HLA-DPA1*03:01/DPB1*04:01	HLA-DQA1*02:01/DQB1*04:02	6880	6908	6970	821	821	851
HLA-DRB1*01:01	HLA-DPA1*03:01/DPB1*04:01	HLA-DQA1*02:01/DQB1*06:04	6880	6908	6970	821	821	851
HLA-DRB1*01:01	HLA-DPA1*03:01/DPB1*04:01	HLA-DQA1*03:01/DQB1*03:02	6880	6908	6970	821	821	851
HLA-DRB1*01:01	HLA-DPA1*03:01/DPB1*04:01	HLA-DQA1*03:01/DQB1*06:01	6880	6908	6970	821	821	851
HLA-DRB1*01:01	HLA-DPA1*03:01/DPB1*04:01	HLA-DQA1*04:01/DQB1*02:01	6880	6908	6970	821	821	851
HLA-DRB1*01:01	HLA-DPA1*03:01/DPB1*04:01	HLA-DQA1*04:01/DQB1*03:01	6886	6914	6976	821	821	851
HLA-DRB1*01:01	HLA-DPA1*03:01/DPB1*04:01	HLA-DQA1*04:01/DQB1*03:02	6880	6908	6970	821	821	851
HLA-DRB1*01:01	HLA-DPA1*03:01/DPB1*04:01	HLA-DQA1*04:01/DQB1*03:03	6880	6908	6970	821	821	851
HLA-DRB1*01:01	HLA-DPA1*03:01/DPB1*04:01	HLA-DQA1*04:01/DQB1*04:02	6880	6908	6970	821	821	851
HLA-DRB1*01:01	HLA-DPA1*03:01/DPB1*04:01	HLA-DQA1*05:01/DQB1*02:01	6880	6908	6970	821	821	851
HLA-DRB1*01:01	HLA-DPA1*03:01/DPB1*04:01	HLA-DQA1*05:01/DQB1*03:01	7190	7218	7280	928	928	958
HLA-DRB1*01:01	HLA-DPA1*03:01/DPB1*04:01	HLA-DQA1*05:01/DQB1*03:02	6880	6908	6970	821	821	851
HLA-DRB1*01:01	HLA-DPA1*03:01/DPB1*04:01	HLA-DQA1*05:01/DQB1*06:01	6880	6908	6970	821	821	851
HLA-DRB1*01:01	HLA-DPA1*03:01/DPB1*04:01	HLA-DQA1*05:01/DQB1*06:02	6880	6908	6970	821	821	851
HLA-DRB1*01:01	HLA-DPA1*03:01/DPB1*04:01	HLA-DQA1*05:01/DQB1*06:03	6880	6908	6970	821	821	851
HLA-DRB1*01:01	HLA-DPA1*03:01/DPB1*04:01	HLA-DQA1*05:01/DQB1*06:04	6880	6908	6970	821	821	851
HLA-DRB1*01:01	HLA-DPA1*03:01/DPB1*04:01	HLA-DQA1*06:01/DQB1*02:01	6880	6908	6970	821	821	851
HLA-DRB1*01:01	HLA-DPA1*03:01/DPB1*04:01	HLA-DQA1*06:01/DQB1*03:01	6962	6990	7052	844	844	874
HLA-DRB1*01:01	HLA-DPA1*03:01/DPB1*04:01	HLA-DQA1*06:01/DQB1*03:03	6880	6908	6970	821	821	851
HLA-DRB1*01:01	HLA-DPA1*03:01/DPB1*04:01	HLA-DQA1*06:01/DQB1*04:02	6880	6908	6970	821	821	851
HLA-DRB1*01:01	HLA-DPA1*03:01/DPB1*04:01	HLA-DQA1*06:01/DQB1*06:01	6880	6908	6970	821	821	851
HLA-DRB1*01:01	HLA-DPA1*03:01/DPB1*04:01	HLA-DQA1*06:01/DQB1*06:03	6880	6908	6970	821	821	851
HLA-DRB1*01:01	HLA-DPA1*03:01/DPB1*04:02	HLA-DQA1*01:01/DQB1*02:01	5358	5353	5410	680	680	691
HLA-DRB1*01:01	HLA-DPA1*03:01/DPB1*04:02	HLA-DQA1*01:01/DQB1*05:01	5358	5353	5410	680	680	691
HLA-DRB1*01:01	HLA-DPA1*03:01/DPB1*04:02	HLA-DQA1*01:01/DQB1*05:02	5358	5353	5410	680	680	691
HLA-DRB1*01:01	HLA-DPA1*03:01/DPB1*04:02	HLA-DQA1*01:01/DQB1*05:03	5358	5353	5410	680	680	691
HLA-DRB1*01:01	HLA-DPA1*03:01/DPB1*04:02	HLA-DQA1*01:01/DQB1*06:01	5358	5353	5410	680	680	691
HLA-DRB1*01:01	HLA-DPA1*03:01/DPB1*04:02	HLA-DQA1*01:01/DQB1*06:02	5358	5353	5410	680	680	691
HLA-DRB1*01:01	HLA-DPA1*03:01/DPB1*04:02	HLA-DQA1*01:01/DQB1*06:04	5358	5353	5410	680	680	691
HLA-DRB1*01:01	HLA-DPA1*03:01/DPB1*04:02	HLA-DQA1*01:02/DQB1*02:01	5358	5353	5410	680	680	691
HLA-DRB1*01:01	HLA-DPA1*03:01/DPB1*04:02	HLA-DQA1*01:02/DQB1*05:01	6453	6449	6506	759	759	769
HLA-DRB1*01:01	HLA-DPA1*03:01/DPB1*04:02	HLA-DQA1*01:02/DQB1*05:02	5358	5353	5410	680	680	691
HLA-DRB1*01:01	HLA-DPA1*03:01/DPB1*04:02	HLA-DQA1*01:02/DQB1*05:03	5368	5363	5420	680	680	691
HLA-DRB1*01:01	HLA-DPA1*03:01/DPB1*04:02	HLA-DQA1*01:02/DQB1*06:01	5391	5386	5443	710	710	721
HLA-DRB1*01:01	HLA-DPA1*03:01/DPB1*04:02	HLA-DQA1*01:02/DQB1*06:02	5527	5523	5580	710	711	722
HLA-DRB1*01:01	HLA-DPA1*03:01/DPB1*04:02	HLA-DQA1*01:02/DQB1*06:03	5358	5353	5410	680	680	691
HLA-DRB1*01:01	HLA-DPA1*03:01/DPB1*04:02	HLA-DQA1*01:02/DQB1*06:04	5358	5353	5410	680	680	691
HLA-DRB1*01:01	HLA-DPA1*03:01/DPB1*04:02	HLA-DQA1*01:02/DQB1*06:09	5358	5353	5410	680	680	691
HLA-DRB1*01:01	HLA-DPA1*03:01/DPB1*04:02	HLA-DQA1*01:03/DQB1*03:03	5358	5353	5410	680	680	691
HLA-DRB1*01:01	HLA-DPA1*03:01/DPB1*04:02	HLA-DQA1*01:03/DQB1*05:02	5358	5353	5410	680	680	691
HLA-DRB1*01:01	HLA-DPA1*03:01/DPB1*04:02	HLA-DQA1*01:03/DQB1*05:03	5358	5353	5410	680	680	691
HLA-DRB1*01:01	HLA-DPA1*03:01/DPB1*04:02	HLA-DQA1*01:03/DQB1*06:01	5391	5386	5443	712	712	723
HLA-DRB1*01:01	HLA-DPA1*03:01/DPB1*04:02	HLA-DQA1*01:03/DQB1*06:02	5398	5393	5450	709	709	720
HLA-DRB1*01:01	HLA-DPA1*03:01/DPB1*04:02	HLA-DQA1*01:03/DQB1*06:03	5358	5353	5410	680	680	691
HLA-DRB1*01:01	HLA-DPA1*03:01/DPB1*04:02	HLA-DQA1*01:03/DQB1*06:09	5358	5353	5410	680	680	691
HLA-DRB1*01:01	HLA-DPA1*03:01/DPB1*04:02	HLA-DQA1*02:01/DQB1*02:01	5358	5353	5410	680	680	691
HLA-DRB1*01:01	HLA-DPA1*03:01/DPB1*04:02	HLA-DQA1*02:01/DQB1*02:02	5358	5353	5410	680	680	691
HLA-DRB1*01:01	HLA-DPA1*03:01/DPB1*04:02	HLA-DQA1*02:01/DQB1*03:03	5360	5355	5412	682	682	693
HLA-DRB1*01:01	HLA-DPA1*03:01/DPB1*04:02	HLA-DQA1*02:01/DQB1*04:02	5358	5353	5410	680	680	691
HLA-DRB1*01:01	HLA-DPA1*03:01/DPB1*04:02	HLA-DQA1*02:01/DQB1*06:04	5358	5353	5410	680	680	691
HLA-DRB1*01:01	HLA-DPA1*03:01/DPB1*04:02	HLA-DQA1*03:01/DQB1*03:02	5358	5353	5410	680	680	691
HLA-DRB1*01:01	HLA-DPA1*03:01/DPB1*04:02	HLA-DQA1*03:01/DQB1*06:01	5358	5353	5410	680	680	691
HLA-DRB1*01:01	HLA-DPA1*03:01/DPB1*04:02	HLA-DQA1*04:01/DQB1*02:01	5358	5353	5410	680	680	691
HLA-DRB1*01:01	HLA-DPA1*03:01/DPB1*04:02	HLA-DQA1*04:01/DQB1*03:01	5364	5359	5416	680	680	691
HLA-DRB1*01:01	HLA-DPA1*03:01/DPB1*04:02	HLA-DQA1*04:01/DQB1*03:02	5358	5353	5410	680	680	691
HLA-DRB1*01:01	HLA-DPA1*03:01/DPB1*04:02	HLA-DQA1*04:01/DQB1*03:03	5358	5353	5410	680	680	691
HLA-DRB1*01:01	HLA-DPA1*03:01/DPB1*04:02	HLA-DQA1*04:01/DQB1*04:02	5358	5353	5410	680	680	691
HLA-DRB1*01:01	HLA-DPA1*03:01/DPB1*04:02	HLA-DQA1*05:01/DQB1*02:01	5358	5353	5410	680	680	691
HLA-DRB1*01:01	HLA-DPA1*03:01/DPB1*04:02	HLA-DQA1*05:01/DQB1*03:01	5668	5663	5720	787	787	798
HLA-DRB1*01:01	HLA-DPA1*03:01/DPB1*04:02	HLA-DQA1*05:01/DQB1*03:02	5358	5353	5410	680	680	691
HLA-DRB1*01:01	HLA-DPA1*03:01/DPB1*04:02	HLA-DQA1*05:01/DQB1*06:01	5358	5353	5410	680	680	691
HLA-DRB1*01:01	HLA-DPA1*03:01/DPB1*04:02	HLA-DQA1*05:01/DQB1*06:02	5358	5353	5410	680	680	691
HLA-DRB1*01:01	HLA-DPA1*03:01/DPB1*04:02	HLA-DQA1*05:01/DQB1*06:03	5358	5353	5410	680	680	691
HLA-DRB1*01:01	HLA-DPA1*03:01/DPB1*04:02	HLA-DQA1*05:01/DQB1*06:04	5358	5353	5410	680	680	691
HLA-DRB1*01:01	HLA-DPA1*03:01/DPB1*04:02	HLA-DQA1*06:01/DQB1*02:01	5358	5353	5410	680	680	691
HLA-DRB1*01:01	HLA-DPA1*03:01/DPB1*04:02	HLA-DQA1*06:01/DQB1*03:01	5440	5435	5492	703	703	714
HLA-DRB1*01:01	HLA-DPA1*03:01/DPB1*04:02	HLA-DQA1*06:01/DQB1*03:03	5358	5353	5410	680	680	691
HLA-DRB1*01:01	HLA-DPA1*03:01/DPB1*04:02	HLA-DQA1*06:01/DQB1*04:02	5358	5353	5410	680	680	691
HLA-DRB1*01:01	HLA-DPA1*03:01/DPB1*04:02	HLA-DQA1*06:01/DQB1*06:01	5358	5353	5410	680	680	691
HLA-DRB1*01:01	HLA-DPA1*03:01/DPB1*04:02	HLA-DQA1*06:01/DQB1*06:03	5358	5353	5410	680	680	691
HLA-DRB1*01:01	HLA-DPA1*04:01/DPB1*04:01	HLA-DQA1*01:01/DQB1*02:01	5616	5613	5667	701	701	712
HLA-DRB1*01:01	HLA-DPA1*04:01/DPB1*04:01	HLA-DQA1*01:01/DQB1*05:01	5616	5613	5667	701	701	712
HLA-DRB1*01:01	HLA-DPA1*04:01/DPB1*04:01	HLA-DQA1*01:01/DQB1*05:02	5616	5613	5667	701	701	712
HLA-DRB1*01:01	HLA-DPA1*04:01/DPB1*04:01	HLA-DQA1*01:01/DQB1*05:03	5616	5613	5667	701	701	712
HLA-DRB1*01:01	HLA-DPA1*04:01/DPB1*04:01	HLA-DQA1*01:01/DQB1*06:01	5616	5613	5667	701	701	712
HLA-DRB1*01:01	HLA-DPA1*04:01/DPB1*04:01	HLA-DQA1*01:01/DQB1*06:02	5616	5613	5667	701	701	712
HLA-DRB1*01:01	HLA-DPA1*04:01/DPB1*04:01	HLA-DQA1*01:01/DQB1*06:04	5616	5613	5667	701	701	712
HLA-DRB1*01:01	HLA-DPA1*04:01/DPB1*04:01	HLA-DQA1*01:02/DQB1*02:01	5616	5613	5667	701	701	712
HLA-DRB1*01:01	HLA-DPA1*04:01/DPB1*04:01	HLA-DQA1*01:02/DQB1*05:01	6698	6696	6750	780	780	790
HLA-DRB1*01:01	HLA-DPA1*04:01/DPB1*04:01	HLA-DQA1*01:02/DQB1*05:02	5616	5613	5667	701	701	712
HLA-DRB1*01:01	HLA-DPA1*04:01/DPB1*04:01	HLA-DQA1*01:02/DQB1*05:03	5626	5623	5677	701	701	712
HLA-DRB1*01:01	HLA-DPA1*04:01/DPB1*04:01	HLA-DQA1*01:02/DQB1*06:01	5649	5646	5700	731	731	742
HLA-DRB1*01:01	HLA-DPA1*04:01/DPB1*04:01	HLA-DQA1*01:02/DQB1*06:02	5785	5783	5837	731	732	743
HLA-DRB1*01:01	HLA-DPA1*04:01/DPB1*04:01	HLA-DQA1*01:02/DQB1*06:03	5616	5613	5667	701	701	712
HLA-DRB1*01:01	HLA-DPA1*04:01/DPB1*04:01	HLA-DQA1*01:02/DQB1*06:04	5616	5613	5667	701	701	712
HLA-DRB1*01:01	HLA-DPA1*04:01/DPB1*04:01	HLA-DQA1*01:02/DQB1*06:09	5616	5613	5667	701	701	712
HLA-DRB1*01:01	HLA-DPA1*04:01/DPB1*04:01	HLA-DQA1*01:03/DQB1*03:03	5616	5613	5667	701	701	712
HLA-DRB1*01:01	HLA-DPA1*04:01/DPB1*04:01	HLA-DQA1*01:03/DQB1*05:02	5616	5613	5667	701	701	712
HLA-DRB1*01:01	HLA-DPA1*04:01/DPB1*04:01	HLA-DQA1*01:03/DQB1*05:03	5616	5613	5667	701	701	712
HLA-DRB1*01:01	HLA-DPA1*04:01/DPB1*04:01	HLA-DQA1*01:03/DQB1*06:01	5649	5646	5700	733	733	744
HLA-DRB1*01:01	HLA-DPA1*04:01/DPB1*04:01	HLA-DQA1*01:03/DQB1*06:02	5656	5653	5707	730	730	741
HLA-DRB1*01:01	HLA-DPA1*04:01/DPB1*04:01	HLA-DQA1*01:03/DQB1*06:03	5616	5613	5667	701	701	712
HLA-DRB1*01:01	HLA-DPA1*04:01/DPB1*04:01	HLA-DQA1*01:03/DQB1*06:09	5616	5613	5667	701	701	712
HLA-DRB1*01:01	HLA-DPA1*04:01/DPB1*04:01	HLA-DQA1*02:01/DQB1*02:01	5616	5613	5667	701	701	712
HLA-DRB1*01:01	HLA-DPA1*04:01/DPB1*04:01	HLA-DQA1*02:01/DQB1*02:02	5616	5613	5667	701	701	712
HLA-DRB1*01:01	HLA-DPA1*04:01/DPB1*04:01	HLA-DQA1*02:01/DQB1*03:03	5618	5615	5669	703	703	714
HLA-DRB1*01:01	HLA-DPA1*04:01/DPB1*04:01	HLA-DQA1*02:01/DQB1*04:02	5616	5613	5667	701	701	712
HLA-DRB1*01:01	HLA-DPA1*04:01/DPB1*04:01	HLA-DQA1*02:01/DQB1*06:04	5616	5613	5667	701	701	712
HLA-DRB1*01:01	HLA-DPA1*04:01/DPB1*04:01	HLA-DQA1*03:01/DQB1*03:02	5616	5613	5667	701	701	712
HLA-DRB1*01:01	HLA-DPA1*04:01/DPB1*04:01	HLA-DQA1*03:01/DQB1*06:01	5616	5613	5667	701	701	712
HLA-DRB1*01:01	HLA-DPA1*04:01/DPB1*04:01	HLA-DQA1*04:01/DQB1*02:01	5616	5613	5667	701	701	712
HLA-DRB1*01:01	HLA-DPA1*04:01/DPB1*04:01	HLA-DQA1*04:01/DQB1*03:01	5622	5619	5673	701	701	712
HLA-DRB1*01:01	HLA-DPA1*04:01/DPB1*04:01	HLA-DQA1*04:01/DQB1*03:02	5616	5613	5667	701	701	712
HLA-DRB1*01:01	HLA-DPA1*04:01/DPB1*04:01	HLA-DQA1*04:01/DQB1*03:03	5616	5613	5667	701	701	712
HLA-DRB1*01:01	HLA-DPA1*04:01/DPB1*04:01	HLA-DQA1*04:01/DQB1*04:02	5616	5613	5667	701	701	712
HLA-DRB1*01:01	HLA-DPA1*04:01/DPB1*04:01	HLA-DQA1*05:01/DQB1*02:01	5616	5613	5667	701	701	712
HLA-DRB1*01:01	HLA-DPA1*04:01/DPB1*04:01	HLA-DQA1*05:01/DQB1*03:01	5926	5923	5977	808	808	819
HLA-DRB1*01:01	HLA-DPA1*04:01/DPB1*04:01	HLA-DQA1*05:01/DQB1*03:02	5616	5613	5667	701	701	712
HLA-DRB1*01:01	HLA-DPA1*04:01/DPB1*04:01	HLA-DQA1*05:01/DQB1*06:01	5616	5613	5667	701	701	712
HLA-DRB1*01:01	HLA-DPA1*04:01/DPB1*04:01	HLA-DQA1*05:01/DQB1*06:02	5616	5613	5667	701	701	712
HLA-DRB1*01:01	HLA-DPA1*04:01/DPB1*04:01	HLA-DQA1*05:01/DQB1*06:03	5616	5613	5667	701	701	712
HLA-DRB1*01:01	HLA-DPA1*04:01/DPB1*04:01	HLA-DQA1*05:01/DQB1*06:04	5616	5613	5667	701	701	712
HLA-DRB1*01:01	HLA-DPA1*04:01/DPB1*04:01	HLA-DQA1*06:01/DQB1*02:01	5616	5613	5667	701	701	712
HLA-DRB1*01:01	HLA-DPA1*04:01/DPB1*04:01	HLA-DQA1*06:01/DQB1*03:01	5698	5695	5749	724	724	735
HLA-DRB1*01:01	HLA-DPA1*04:01/DPB1*04:01	HLA-DQA1*06:01/DQB1*03:03	5616	5613	5667	701	701	712
HLA-DRB1*01:01	HLA-DPA1*04:01/DPB1*04:01	HLA-DQA1*06:01/DQB1*04:02	5616	5613	5667	701	701	712
HLA-DRB1*01:01	HLA-DPA1*04:01/DPB1*04:01	HLA-DQA1*06:01/DQB1*06:01	5616	5613	5667	701	701	712
HLA-DRB1*01:01	HLA-DPA1*04:01/DPB1*04:01	HLA-DQA1*06:01/DQB1*06:03	5616	5613	5667	701	701	712
HLA-DRB1*01:01	HLA-DPA1*04:01/DPB1*04:02	HLA-DQA1*01:01/DQB1*02:01	4959	4954	5010	619	619	630
HLA-DRB1*01:01	HLA-DPA1*04:01/DPB1*04:02	HLA-DQA1*01:01/DQB1*05:01	4959	4954	5010	619	619	630
HLA-DRB1*01:01	HLA-DPA1*04:01/DPB1*04:02	HLA-DQA1*01:01/DQB1*05:02	4959	4954	5010	619	619	630
HLA-DRB1*01:01	HLA-DPA1*04:01/DPB1*04:02	HLA-DQA1*01:01/DQB1*05:03	4959	4954	5010	619	619	630
HLA-DRB1*01:01	HLA-DPA1*04:01/DPB1*04:02	HLA-DQA1*01:01/DQB1*06:01	4959	4954	5010	619	619	630
HLA-DRB1*01:01	HLA-DPA1*04:01/DPB1*04:02	HLA-DQA1*01:01/DQB1*06:02	4959	4954	5010	619	619	630
HLA-DRB1*01:01	HLA-DPA1*04:01/DPB1*04:02	HLA-DQA1*01:01/DQB1*06:04	4959	4954	5010	619	619	630
HLA-DRB1*01:01	HLA-DPA1*04:01/DPB1*04:02	HLA-DQA1*01:02/DQB1*02:01	4959	4954	5010	619	619	630
HLA-DRB1*01:01	HLA-DPA1*04:01/DPB1*04:02	HLA-DQA1*01:02/DQB1*05:01	6114	6110	6166	698	698	708
HLA-DRB1*01:01	HLA-DPA1*04:01/DPB1*04:02	HLA-DQA1*01:02/DQB1*05:02	4959	4954	5010	619	619	630
HLA-DRB1*01:01	HLA-DPA1*04:01/DPB1*04:02	HLA-DQA1*01:02/DQB1*05:03	4969	4964	5020	619	619	630
HLA-DRB1*01:01	HLA-DPA1*04:01/DPB1*04:02	HLA-DQA1*01:02/DQB1*06:01	4992	4987	5043	649	649	660
HLA-DRB1*01:01	HLA-DPA1*04:01/DPB1*04:02	HLA-DQA1*01:02/DQB1*06:02	5128	5124	5180	649	650	661
HLA-DRB1*01:01	HLA-DPA1*04:01/DPB1*04:02	HLA-DQA1*01:02/DQB1*06:03	4959	4954	5010	619	619	630
HLA-DRB1*01:01	HLA-DPA1*04:01/DPB1*04:02	HLA-DQA1*01:02/DQB1*06:04	4959	4954	5010	619	619	630
HLA-DRB1*01:01	HLA-DPA1*04:01/DPB1*04:02	HLA-DQA1*01:02/DQB1*06:09	4959	4954	5010	619	619	630
HLA-DRB1*01:01	HLA-DPA1*04:01/DPB1*04:02	HLA-DQA1*01:03/DQB1*03:03	4959	4954	5010	619	619	630
HLA-DRB1*01:01	HLA-DPA1*04:01/DPB1*04:02	HLA-DQA1*01:03/DQB1*05:02	4959	4954	5010	619	619	630
HLA-DRB1*01:01	HLA-DPA1*04:01/DPB1*04:02	HLA-DQA1*01:03/DQB1*05:03	4959	4954	5010	619	619	630
HLA-DRB1*01:01	HLA-DPA1*04:01/DPB1*04:02	HLA-DQA1*01:03/DQB1*06:01	4992	4987	5043	651	651	662
HLA-DRB1*01:01	HLA-DPA1*04:01/DPB1*04:02	HLA-DQA1*01:03/DQB1*06:02	4999	4994	5050	648	648	659
HLA-DRB1*01:01	HLA-DPA1*04:01/DPB1*04:02	HLA-DQA1*01:03/DQB1*06:03	4959	4954	5010	619	619	630
HLA-DRB1*01:01	HLA-DPA1*04:01/DPB1*04:02	HLA-DQA1*01:03/DQB1*06:09	4959	4954	5010	619	619	630
HLA-DRB1*01:01	HLA-DPA1*04:01/DPB1*04:02	HLA-DQA1*02:01/DQB1*02:01	4959	4954	5010	619	619	630
HLA-DRB1*01:01	HLA-DPA1*04:01/DPB1*04:02	HLA-DQA1*02:01/DQB1*02:02	4959	4954	5010	619	619	630
HLA-DRB1*01:01	HLA-DPA1*04:01/DPB1*04:02	HLA-DQA1*02:01/DQB1*03:03	4961	4956	5012	621	621	632
HLA-DRB1*01:01	HLA-DPA1*04:01/DPB1*04:02	HLA-DQA1*02:01/DQB1*04:02	4959	4954	5010	619	619	630
HLA-DRB1*01:01	HLA-DPA1*04:01/DPB1*04:02	HLA-DQA1*02:01/DQB1*06:04	4959	4954	5010	619	619	630
HLA-DRB1*01:01	HLA-DPA1*04:01/DPB1*04:02	HLA-DQA1*03:01/DQB1*03:02	4959	4954	5010	619	619	630
HLA-DRB1*01:01	HLA-DPA1*04:01/DPB1*04:02	HLA-DQA1*03:01/DQB1*06:01	4959	4954	5010	619	619	630
HLA-DRB1*01:01	HLA-DPA1*04:01/DPB1*04:02	HLA-DQA1*04:01/DQB1*02:01	4959	4954	5010	619	619	630
HLA-DRB1*01:01	HLA-DPA1*04:01/DPB1*04:02	HLA-DQA1*04:01/DQB1*03:01	4965	4960	5016	619	619	630
HLA-DRB1*01:01	HLA-DPA1*04:01/DPB1*04:02	HLA-DQA1*04:01/DQB1*03:02	4959	4954	5010	619	619	630
HLA-DRB1*01:01	HLA-DPA1*04:01/DPB1*04:02	HLA-DQA1*04:01/DQB1*03:03	4959	4954	5010	619	619	630
HLA-DRB1*01:01	HLA-DPA1*04:01/DPB1*04:02	HLA-DQA1*04:01/DQB1*04:02	4959	4954	5010	619	619	630
HLA-DRB1*01:01	HLA-DPA1*04:01/DPB1*04:02	HLA-DQA1*05:01/DQB1*02:01	4959	4954	5010	619	619	630
HLA-DRB1*01:01	HLA-DPA1*04:01/DPB1*04:02	HLA-DQA1*05:01/DQB1*03:01	5269	5264	5320	726	726	737
HLA-DRB1*01:01	HLA-DPA1*04:01/DPB1*04:02	HLA-DQA1*05:01/DQB1*03:02	4959	4954	5010	619	619	630
HLA-DRB1*01:01	HLA-DPA1*04:01/DPB1*04:02	HLA-DQA1*05:01/DQB1*06:01	4959	4954	5010	619	619	630
HLA-DRB1*01:01	HLA-DPA1*04:01/DPB1*04:02	HLA-DQA1*05:01/DQB1*06:02	4959	4954	5010	619	619	630
HLA-DRB1*01:01	HLA-DPA1*04:01/DPB1*04:02	HLA-DQA1*05:01/DQB1*06:03	4959	4954	5010	619	619	630
HLA-DRB1*01:01	HLA-DPA1*04:01/DPB1*04:02	HLA-DQA1*05:01/DQB1*06:04	4959	4954	5010	619	619	630
HLA-DRB1*01:01	HLA-DPA1*04:01/DPB1*04:02	HLA-DQA1*06:01/DQB1*02:01	4959	4954	5010	619	619	630
HLA-DRB1*01:01	HLA-DPA1*04:01/DPB1*04:02	HLA-DQA1*06:01/DQB1*03:01	5041	5036	5092	642	642	653
HLA-DRB1*01:01	HLA-DPA1*04:01/DPB1*04:02	HLA-DQA1*06:01/DQB1*03:03	4959	4954	5010	619	619	630
HLA-DRB1*01:01	HLA-DPA1*04:01/DPB1*04:02	HLA-DQA1*06:01/DQB1*04:02	4959	4954	5010	619	619	630
HLA-DRB1*01:01	HLA-DPA1*04:01/DPB1*04:02	HLA-DQA1*06:01/DQB1*06:01	4959	4954	5010	619	619	630
HLA-DRB1*01:01	HLA-DPA1*04:01/DPB1*04:02	HLA-DQA1*06:01/DQB1*06:03	4959	4954	5010	619	619	630
HLA-DRB1*01:01	HLA-DPA1*04:01/DPB1*13:01	HLA-DQA1*01:01/DQB1*02:01	4949	4944	5000	610	610	621
HLA-DRB1*01:01	HLA-DPA1*04:01/DPB1*13:01	HLA-DQA1*01:01/DQB1*05:01	4949	4944	5000	610	610	621
HLA-DRB1*01:01	HLA-DPA1*04:01/DPB1*13:01	HLA-DQA1*01:01/DQB1*05:02	4949	4944	5000	610	610	621
HLA-DRB1*01:01	HLA-DPA1*04:01/DPB1*13:01	HLA-DQA1*01:01/DQB1*05:03	4949	4944	5000	610	610	621
HLA-DRB1*01:01	HLA-DPA1*04:01/DPB1*13:01	HLA-DQA1*01:01/DQB1*06:01	4949	4944	5000	610	610	621
HLA-DRB1*01:01	HLA-DPA1*04:01/DPB1*13:01	HLA-DQA1*01:01/DQB1*06:02	4949	4944	5000	610	610	621
HLA-DRB1*01:01	HLA-DPA1*04:01/DPB1*13:01	HLA-DQA1*01:01/DQB1*06:04	4949	4944	5000	610	610	621
HLA-DRB1*01:01	HLA-DPA1*04:01/DPB1*13:01	HLA-DQA1*01:02/DQB1*02:01	4949	4944	5000	610	610	621
HLA-DRB1*01:01	HLA-DPA1*04:01/DPB1*13:01	HLA-DQA1*01:02/DQB1*05:01	6104	6100	6156	689	689	699
HLA-DRB1*01:01	HLA-DPA1*04:01/DPB1*13:01	HLA-DQA1*01:02/DQB1*05:02	4949	4944	5000	610	610	621
HLA-DRB1*01:01	HLA-DPA1*04:01/DPB1*13:01	HLA-DQA1*01:02/DQB1*05:03	4959	4954	5010	610	610	621
HLA-DRB1*01:01	HLA-DPA1*04:01/DPB1*13:01	HLA-DQA1*01:02/DQB1*06:01	4982	4977	5033	640	640	651
HLA-DRB1*01:01	HLA-DPA1*04:01/DPB1*13:01	HLA-DQA1*01:02/DQB1*06:02	5118	5114	5170	640	641	652
HLA-DRB1*01:01	HLA-DPA1*04:01/DPB1*13:01	HLA-DQA1*01:02/DQB1*06:03	4949	4944	5000	610	610	621
HLA-DRB1*01:01	HLA-DPA1*04:01/DPB1*13:01	HLA-DQA1*01:02/DQB1*06:04	4949	4944	5000	610	610	621
HLA-DRB1*01:01	HLA-DPA1*04:01/DPB1*13:01	HLA-DQA1*01:02/DQB1*06:09	4949	4944	5000	610	610	621
HLA-DRB1*01:01	HLA-DPA1*04:01/DPB1*13:01	HLA-DQA1*01:03/DQB1*03:03	4949	4944	5000	610	610	621
HLA-DRB1*01:01	HLA-DPA1*04:01/DPB1*13:01	HLA-DQA1*01:03/DQB1*05:02	4949	4944	5000	610	610	621
HLA-DRB1*01:01	HLA-DPA1*04:01/DPB1*13:01	HLA-DQA1*01:03/DQB1*05:03	4949	4944	5000	610	610	621
HLA-DRB1*01:01	HLA-DPA1*04:01/DPB1*13:01	HLA-DQA1*01:03/DQB1*06:01	4982	4977	5033	642	642	653
HLA-DRB1*01:01	HLA-DPA1*04:01/DPB1*13:01	HLA-DQA1*01:03/DQB1*06:02	4989	4984	5040	639	639	650
HLA-DRB1*01:01	HLA-DPA1*04:01/DPB1*13:01	HLA-DQA1*01:03/DQB1*06:03	4949	4944	5000	610	610	621
HLA-DRB1*01:01	HLA-DPA1*04:01/DPB1*13:01	HLA-DQA1*01:03/DQB1*06:09	4949	4944	5000	610	610	621
HLA-DRB1*01:01	HLA-DPA1*04:01/DPB1*13:01	HLA-DQA1*02:01/DQB1*02:01	4949	4944	5000	610	610	621
HLA-DRB1*01:01	HLA-DPA1*04:01/DPB1*13:01	HLA-DQA1*02:01/DQB1*02:02	4949	4944	5000	610	610	621
HLA-DRB1*01:01	HLA-DPA1*04:01/DPB1*13:01	HLA-DQA1*02:01/DQB1*03:03	4951	4946	5002	612	612	623
HLA-DRB1*01:01	HLA-DPA1*04:01/DPB1*13:01	HLA-DQA1*02:01/DQB1*04:02	4949	4944	5000	610	610	621
HLA-DRB1*01:01	HLA-DPA1*04:01/DPB1*13:01	HLA-DQA1*02:01/DQB1*06:04	4949	4944	5000	610	610	621
HLA-DRB1*01:01	HLA-DPA1*04:01/DPB1*13:01	HLA-DQA1*03:01/DQB1*03:02	4949	4944	5000	610	610	621
HLA-DRB1*01:01	HLA-DPA1*04:01/DPB1*13:01	HLA-DQA1*03:01/DQB1*06:01	4949	4944	5000	610	610	621
HLA-DRB1*01:01	HLA-DPA1*04:01/DPB1*13:01	HLA-DQA1*04:01/DQB1*02:01	4949	4944	5000	610	610	621
HLA-DRB1*01:01	HLA-DPA1*04:01/DPB1*13:01	HLA-DQA1*04:01/DQB1*03:01	4955	4950	5006	610	610	621
HLA-DRB1*01:01	HLA-DPA1*04:01/DPB1*13:01	HLA-DQA1*04:01/DQB1*03:02	4949	4944	5000	610	610	621
HLA-DRB1*01:01	HLA-DPA1*04:01/DPB1*13:01	HLA-DQA1*04:01/DQB1*03:03	4949	4944	5000	610	610	621
HLA-DRB1*01:01	HLA-DPA1*04:01/DPB1*13:01	HLA-DQA1*04:01/DQB1*04:02	4949	4944	5000	610	610	621
HLA-DRB1*01:01	HLA-DPA1*04:01/DPB1*13:01	HLA-DQA1*05:01/DQB1*02:01	4949	4944	5000	610	610	621
HLA-DRB1*01:01	HLA-DPA1*04:01/DPB1*13:01	HLA-DQA1*05:01/DQB1*03:01	5259	5254	5310	717	717	728
HLA-DRB1*01:01	HLA-DPA1*04:01/DPB1*13:01	HLA-DQA1*05:01/DQB1*03:02	4949	4944	5000	610	610	621
HLA-DRB1*01:01	HLA-DPA1*04:01/DPB1*13:01	HLA-DQA1*05:01/DQB1*06:01	4949	4944	5000	610	610	621
HLA-DRB1*01:01	HLA-DPA1*04:01/DPB1*13:01	HLA-DQA1*05:01/DQB1*06:02	4949	4944	5000	610	610	621
HLA-DRB1*01:01	HLA-DPA1*04:01/DPB1*13:01	HLA-DQA1*05:01/DQB1*06:03	4949	4944	5000	610	610	621
HLA-DRB1*01:01	HLA-DPA1*04:01/DPB1*13:01	HLA-DQA1*05:01/DQB1*06:04	4949	4944	5000	610	610	621
HLA-DRB1*01:01	HLA-DPA1*04:01/DPB1*13:01	HLA-DQA1*06:01/DQB1*02:01	4949	4944	5000	610	610	621
HLA-DRB1*01:01	HLA-DPA1*04:01/DPB1*13:01	HLA-DQA1*06:01/DQB1*03:01	5031	5026	5082	633	633	644
HLA-DRB1*01:01	HLA-DPA1*04:01/DPB1*13:01	HLA-DQA1*06:01/DQB1*03:03	4949	4944	5000	610	610	621
HLA-DRB1*01:01	HLA-DPA1*04:01/DPB1*13:01	HLA-DQA1*06:01/DQB1*04:02	4949	4944	5000	610	610	621
HLA-DRB1*01:01	HLA-DPA1*04:01/DPB1*13:01	HLA-DQA1*06:01/DQB1*06:01	4949	4944	5000	610	610	621
HLA-DRB1*01:01	HLA-DPA1*04:01/DPB1*13:01	HLA-DQA1*06:01/DQB1*06:03	4949	4944	5000	610	610	621
HLA-DRB1*01:01	HLA-DPA1*04:01/DPB1*14:01	HLA-DQA1*01:01/DQB1*02:01	4928	4923	4979	589	589	600
HLA-DRB1*01:01	HLA-DPA1*04:01/DPB1*14:01	HLA-DQA1*01:01/DQB1*05:01	4928	4923	4979	589	589	600
HLA-DRB1*01:01	HLA-DPA1*04:01/DPB1*14:01	HLA-DQA1*01:01/DQB1*05:02	4928	4923	4979	589	589	600
HLA-DRB1*01:01	HLA-DPA1*04:01/DPB1*14:01	HLA-DQA1*01:01/DQB1*05:03	4928	4923	4979	589	589	600
HLA-DRB1*01:01	HLA-DPA1*04:01/DPB1*14:01	HLA-DQA1*01:01/DQB1*06:01	4928	4923	4979	589	589	600
HLA-DRB1*01:01	HLA-DPA1*04:01/DPB1*14:01	HLA-DQA1*01:01/DQB1*06:02	4928	4923	4979	589	589	600
HLA-DRB1*01:01	HLA-DPA1*04:01/DPB1*14:01	HLA-DQA1*01:01/DQB1*06:04	4928	4923	4979	589	589	600
HLA-DRB1*01:01	HLA-DPA1*04:01/DPB1*14:01	HLA-DQA1*01:02/DQB1*02:01	4928	4923	4979	589	589	600
HLA-DRB1*01:01	HLA-DPA1*04:01/DPB1*14:01	HLA-DQA1*01:02/DQB1*05:01	6083	6079	6135	668	668	678
HLA-DRB1*01:01	HLA-DPA1*04:01/DPB1*14:01	HLA-DQA1*01:02/DQB1*05:02	4928	4923	4979	589	589	600
HLA-DRB1*01:01	HLA-DPA1*04:01/DPB1*14:01	HLA-DQA1*01:02/DQB1*05:03	4938	4933	4989	589	589	600
HLA-DRB1*01:01	HLA-DPA1*04:01/DPB1*14:01	HLA-DQA1*01:02/DQB1*06:01	4961	4956	5012	619	619	630
HLA-DRB1*01:01	HLA-DPA1*04:01/DPB1*14:01	HLA-DQA1*01:02/DQB1*06:02	5097	5093	5149	619	620	631
HLA-DRB1*01:01	HLA-DPA1*04:01/DPB1*14:01	HLA-DQA1*01:02/DQB1*06:03	4928	4923	4979	589	589	600
HLA-DRB1*01:01	HLA-DPA1*04:01/DPB1*14:01	HLA-DQA1*01:02/DQB1*06:04	4928	4923	4979	589	589	600
HLA-DRB1*01:01	HLA-DPA1*04:01/DPB1*14:01	HLA-DQA1*01:02/DQB1*06:09	4928	4923	4979	589	589	600
HLA-DRB1*01:01	HLA-DPA1*04:01/DPB1*14:01	HLA-DQA1*01:03/DQB1*03:03	4928	4923	4979	589	589	600
HLA-DRB1*01:01	HLA-DPA1*04:01/DPB1*14:01	HLA-DQA1*01:03/DQB1*05:02	4928	4923	4979	589	589	600
HLA-DRB1*01:01	HLA-DPA1*04:01/DPB1*14:01	HLA-DQA1*01:03/DQB1*05:03	4928	4923	4979	589	589	600
HLA-DRB1*01:01	HLA-DPA1*04:01/DPB1*14:01	HLA-DQA1*01:03/DQB1*06:01	4961	4956	5012	621	621	632
HLA-DRB1*01:01	HLA-DPA1*04:01/DPB1*14:01	HLA-DQA1*01:03/DQB1*06:02	4968	4963	5019	618	618	629
HLA-DRB1*01:01	HLA-DPA1*04:01/DPB1*14:01	HLA-DQA1*01:03/DQB1*06:03	4928	4923	4979	589	589	600
HLA-DRB1*01:01	HLA-DPA1*04:01/DPB1*14:01	HLA-DQA1*01:03/DQB1*06:09	4928	4923	4979	589	589	600
HLA-DRB1*01:01	HLA-DPA1*04:01/DPB1*14:01	HLA-DQA1*02:01/DQB1*02:01	4928	4923	4979	589	589	600
HLA-DRB1*01:01	HLA-DPA1*04:01/DPB1*14:01	HLA-DQA1*02:01/DQB1*02:02	4928	4923	4979	589	589	600
HLA-DRB1*01:01	HLA-DPA1*04:01/DPB1*14:01	HLA-DQA1*02:01/DQB1*03:03	4930	4925	4981	591	591	602
HLA-DRB1*01:01	HLA-DPA1*04:01/DPB1*14:01	HLA-DQA1*02:01/DQB1*04:02	4928	4923	4979	589	589	600
HLA-DRB1*01:01	HLA-DPA1*04:01/DPB1*14:01	HLA-DQA1*02:01/DQB1*06:04	4928	4923	4979	589	589	600
HLA-DRB1*01:01	HLA-DPA1*04:01/DPB1*14:01	HLA-DQA1*03:01/DQB1*03:02	4928	4923	4979	589	589	600
HLA-DRB1*01:01	HLA-DPA1*04:01/DPB1*14:01	HLA-DQA1*03:01/DQB1*06:01	4928	4923	4979	589	589	600
HLA-DRB1*01:01	HLA-DPA1*04:01/DPB1*14:01	HLA-DQA1*04:01/DQB1*02:01	4928	4923	4979	589	589	600
HLA-DRB1*01:01	HLA-DPA1*04:01/DPB1*14:01	HLA-DQA1*04:01/DQB1*03:01	4934	4929	4985	589	589	600
HLA-DRB1*01:01	HLA-DPA1*04:01/DPB1*14:01	HLA-DQA1*04:01/DQB1*03:02	4928	4923	4979	589	589	600
HLA-DRB1*01:01	HLA-DPA1*04:01/DPB1*14:01	HLA-DQA1*04:01/DQB1*03:03	4928	4923	4979	589	589	600
HLA-DRB1*01:01	HLA-DPA1*04:01/DPB1*14:01	HLA-DQA1*04:01/DQB1*04:02	4928	4923	4979	589	589	600
HLA-DRB1*01:01	HLA-DPA1*04:01/DPB1*14:01	HLA-DQA1*05:01/DQB1*02:01	4928	4923	4979	589	589	600
HLA-DRB1*01:01	HLA-DPA1*04:01/DPB1*14:01	HLA-DQA1*05:01/DQB1*03:01	5238	5233	5289	696	696	707
HLA-DRB1*01:01	HLA-DPA1*04:01/DPB1*14:01	HLA-DQA1*05:01/DQB1*03:02	4928	4923	4979	589	589	600
HLA-DRB1*01:01	HLA-DPA1*04:01/DPB1*14:01	HLA-DQA1*05:01/DQB1*06:01	4928	4923	4979	589	589	600
HLA-DRB1*01:01	HLA-DPA1*04:01/DPB1*14:01	HLA-DQA1*05:01/DQB1*06:02	4928	4923	4979	589	589	600
HLA-DRB1*01:01	HLA-DPA1*04:01/DPB1*14:01	HLA-DQA1*05:01/DQB1*06:03	4928	4923	4979	589	589	600
HLA-DRB1*01:01	HLA-DPA1*04:01/DPB1*14:01	HLA-DQA1*05:01/DQB1*06:04	4928	4923	4979	589	589	600
HLA-DRB1*01:01	HLA-DPA1*04:01/DPB1*14:01	HLA-DQA1*06:01/DQB1*02:01	4928	4923	4979	589	589	600
HLA-DRB1*01:01	HLA-DPA1*04:01/DPB1*14:01	HLA-DQA1*06:01/DQB1*03:01	5010	5005	5061	612	612	623
HLA-DRB1*01:01	HLA-DPA1*04:01/DPB1*14:01	HLA-DQA1*06:01/DQB1*03:03	4928	4923	4979	589	589	600
HLA-DRB1*01:01	HLA-DPA1*04:01/DPB1*14:01	HLA-DQA1*06:01/DQB1*04:02	4928	4923	4979	589	589	600
HLA-DRB1*01:01	HLA-DPA1*04:01/DPB1*14:01	HLA-DQA1*06:01/DQB1*06:01	4928	4923	4979	589	589	600
HLA-DRB1*01:01	HLA-DPA1*04:01/DPB1*14:01	HLA-DQA1*06:01/DQB1*06:03	4928	4923	4979	589	589	600
HLA-DRB1*01:02	HLA-DPA1*01:03/DPB1*02:01	HLA-DQA1*01:01/DQB1*02:01	1450	1443	1448	219	219	218
HLA-DRB1*01:02	HLA-DPA1*01:03/DPB1*02:01	HLA-DQA1*01:01/DQB1*05:01	1450	1443	1448	219	219	218
HLA-DRB1*01:02	HLA-DPA1*01:03/DPB1*02:01	HLA-DQA1*01:01/DQB1*05:02	1450	1443	1448	219	219	218
HLA-DRB1*01:02	HLA-DPA1*01:03/DPB1*02:01	HLA-DQA1*01:01/DQB1*05:03	1450	1443	1448	219	219	218
HLA-DRB1*01:02	HLA-DPA1*01:03/DPB1*02:01	HLA-DQA1*01:01/DQB1*06:01	1451	1444	1449	220	220	219
HLA-DRB1*01:02	HLA-DPA1*01:03/DPB1*02:01	HLA-DQA1*01:01/DQB1*06:02	1450	1443	1448	219	219	218
HLA-DRB1*01:02	HLA-DPA1*01:03/DPB1*02:01	HLA-DQA1*01:01/DQB1*06:04	1450	1443	1448	219	219	218
HLA-DRB1*01:02	HLA-DPA1*01:03/DPB1*02:01	HLA-DQA1*01:02/DQB1*02:01	1450	1443	1448	219	219	218
HLA-DRB1*01:02	HLA-DPA1*01:03/DPB1*02:01	HLA-DQA1*01:02/DQB1*05:01	3254	3248	3257	396	396	393
HLA-DRB1*01:02	HLA-DPA1*01:03/DPB1*02:01	HLA-DQA1*01:02/DQB1*05:02	1450	1443	1448	219	219	218
HLA-DRB1*01:02	HLA-DPA1*01:03/DPB1*02:01	HLA-DQA1*01:02/DQB1*05:03	1479	1472	1477	221	221	220
HLA-DRB1*01:02	HLA-DPA1*01:03/DPB1*02:01	HLA-DQA1*01:02/DQB1*06:01	1536	1529	1534	275	275	274
HLA-DRB1*01:02	HLA-DPA1*01:03/DPB1*02:01	HLA-DQA1*01:02/DQB1*06:02	1700	1694	1699	273	274	273
HLA-DRB1*01:02	HLA-DPA1*01:03/DPB1*02:01	HLA-DQA1*01:02/DQB1*06:03	1450	1443	1448	219	219	218
HLA-DRB1*01:02	HLA-DPA1*01:03/DPB1*02:01	HLA-DQA1*01:02/DQB1*06:04	1450	1443	1448	219	219	218
HLA-DRB1*01:02	HLA-DPA1*01:03/DPB1*02:01	HLA-DQA1*01:02/DQB1*06:09	1450	1443	1448	219	219	218
HLA-DRB1*01:02	HLA-DPA1*01:03/DPB1*02:01	HLA-DQA1*01:03/DQB1*03:03	1450	1443	1448	219	219	218
HLA-DRB1*01:02	HLA-DPA1*01:03/DPB1*02:01	HLA-DQA1*01:03/DQB1*05:02	1450	1443	1448	219	219	218
HLA-DRB1*01:02	HLA-DPA1*01:03/DPB1*02:01	HLA-DQA1*01:03/DQB1*05:03	1450	1443	1448	219	219	218
HLA-DRB1*01:02	HLA-DPA1*01:03/DPB1*02:01	HLA-DQA1*01:03/DQB1*06:01	1543	1536	1541	285	285	284
HLA-DRB1*01:02	HLA-DPA1*01:03/DPB1*02:01	HLA-DQA1*01:03/DQB1*06:02	1549	1542	1547	273	273	272
HLA-DRB1*01:02	HLA-DPA1*01:03/DPB1*02:01	HLA-DQA1*01:03/DQB1*06:03	1450	1443	1448	219	219	218
HLA-DRB1*01:02	HLA-DPA1*01:03/DPB1*02:01	HLA-DQA1*01:03/DQB1*06:09	1454	1447	1452	223	223	222
HLA-DRB1*01:02	HLA-DPA1*01:03/DPB1*02:01	HLA-DQA1*02:01/DQB1*02:01	1450	1443	1448	219	219	218
HLA-DRB1*01:02	HLA-DPA1*01:03/DPB1*02:01	HLA-DQA1*02:01/DQB1*02:02	1450	1443	1448	219	219	218
HLA-DRB1*01:02	HLA-DPA1*01:03/DPB1*02:01	HLA-DQA1*02:01/DQB1*03:03	1461	1454	1459	228	228	227
HLA-DRB1*01:02	HLA-DPA1*01:03/DPB1*02:01	HLA-DQA1*02:01/DQB1*04:02	1452	1445	1450	221	221	220
HLA-DRB1*01:02	HLA-DPA1*01:03/DPB1*02:01	HLA-DQA1*02:01/DQB1*06:04	1450	1443	1448	219	219	218
HLA-DRB1*01:02	HLA-DPA1*01:03/DPB1*02:01	HLA-DQA1*03:01/DQB1*03:02	1450	1443	1448	219	219	218
HLA-DRB1*01:02	HLA-DPA1*01:03/DPB1*02:01	HLA-DQA1*03:01/DQB1*06:01	1450	1443	1448	219	219	218
HLA-DRB1*01:02	HLA-DPA1*01:03/DPB1*02:01	HLA-DQA1*04:01/DQB1*02:01	1450	1443	1448	219	219	218
HLA-DRB1*01:02	HLA-DPA1*01:03/DPB1*02:01	HLA-DQA1*04:01/DQB1*03:01	1456	1449	1454	219	219	218
HLA-DRB1*01:02	HLA-DPA1*01:03/DPB1*02:01	HLA-DQA1*04:01/DQB1*03:02	1450	1443	1448	219	219	218
HLA-DRB1*01:02	HLA-DPA1*01:03/DPB1*02:01	HLA-DQA1*04:01/DQB1*03:03	1450	1443	1448	219	219	218
HLA-DRB1*01:02	HLA-DPA1*01:03/DPB1*02:01	HLA-DQA1*04:01/DQB1*04:02	1450	1443	1448	219	219	218
HLA-DRB1*01:02	HLA-DPA1*01:03/DPB1*02:01	HLA-DQA1*05:01/DQB1*02:01	1450	1443	1448	219	219	218
HLA-DRB1*01:02	HLA-DPA1*01:03/DPB1*02:01	HLA-DQA1*05:01/DQB1*03:01	1923	1916	1921	372	372	371
HLA-DRB1*01:02	HLA-DPA1*01:03/DPB1*02:01	HLA-DQA1*05:01/DQB1*03:02	1450	1443	1448	219	219	218
HLA-DRB1*01:02	HLA-DPA1*01:03/DPB1*02:01	HLA-DQA1*05:01/DQB1*06:01	1450	1443	1448	219	219	218
HLA-DRB1*01:02	HLA-DPA1*01:03/DPB1*02:01	HLA-DQA1*05:01/DQB1*06:02	1450	1443	1448	219	219	218
HLA-DRB1*01:02	HLA-DPA1*01:03/DPB1*02:01	HLA-DQA1*05:01/DQB1*06:03	1450	1443	1448	219	219	218
HLA-DRB1*01:02	HLA-DPA1*01:03/DPB1*02:01	HLA-DQA1*05:01/DQB1*06:04	1450	1443	1448	219	219	218
HLA-DRB1*01:02	HLA-DPA1*01:03/DPB1*02:01	HLA-DQA1*06:01/DQB1*02:01	1450	1443	1448	219	219	218
HLA-DRB1*01:02	HLA-DPA1*01:03/DPB1*02:01	HLA-DQA1*06:01/DQB1*03:01	1577	1570	1575	259	259	258
HLA-DRB1*01:02	HLA-DPA1*01:03/DPB1*02:01	HLA-DQA1*06:01/DQB1*03:03	1450	1443	1448	219	219	218
HLA-DRB1*01:02	HLA-DPA1*01:03/DPB1*02:01	HLA-DQA1*06:01/DQB1*04:02	1450	1443	1448	219	219	218
HLA-DRB1*01:02	HLA-DPA1*01:03/DPB1*02:01	HLA-DQA1*06:01/DQB1*06:01	1450	1443	1448	219	219	218
HLA-DRB1*01:02	HLA-DPA1*01:03/DPB1*02:01	HLA-DQA1*06:01/DQB1*06:03	1450	1443	1448	219	219	218
HLA-DRB1*01:02	HLA-DPA1*01:03/DPB1*03:01	HLA-DQA1*01:01/DQB1*02:01	437	439	443	24	26	24
HLA-DRB1*01:02	HLA-DPA1*01:03/DPB1*03:01	HLA-DQA1*01:01/DQB1*05:01	437	439	443	24	26	24
HLA-DRB1*01:02	HLA-DPA1*01:03/DPB1*03:01	HLA-DQA1*01:01/DQB1*05:02	437	439	443	24	26	24
HLA-DRB1*01:02	HLA-DPA1*01:03/DPB1*03:01	HLA-DQA1*01:01/DQB1*05:03	437	439	443	24	26	24
HLA-DRB1*01:02	HLA-DPA1*01:03/DPB1*03:01	HLA-DQA1*01:01/DQB1*06:01	438	440	444	25	27	25
HLA-DRB1*01:02	HLA-DPA1*01:03/DPB1*03:01	HLA-DQA1*01:01/DQB1*06:02	437	439	443	24	26	24
HLA-DRB1*01:02	HLA-DPA1*01:03/DPB1*03:01	HLA-DQA1*01:01/DQB1*06:04	437	439	443	24	26	24
HLA-DRB1*01:02	HLA-DPA1*01:03/DPB1*03:01	HLA-DQA1*01:02/DQB1*02:01	437	439	443	24	26	24
HLA-DRB1*01:02	HLA-DPA1*01:03/DPB1*03:01	HLA-DQA1*01:02/DQB1*05:01	2328	2331	2339	204	206	202
HLA-DRB1*01:02	HLA-DPA1*01:03/DPB1*03:01	HLA-DQA1*01:02/DQB1*05:02	437	439	443	24	26	24
HLA-DRB1*01:02	HLA-DPA1*01:03/DPB1*03:01	HLA-DQA1*01:02/DQB1*05:03	465	467	471	25	27	25
HLA-DRB1*01:02	HLA-DPA1*01:03/DPB1*03:01	HLA-DQA1*01:02/DQB1*06:01	520	522	526	77	79	77
HLA-DRB1*01:02	HLA-DPA1*01:03/DPB1*03:01	HLA-DQA1*01:02/DQB1*06:02	684	687	691	75	78	76
HLA-DRB1*01:02	HLA-DPA1*01:03/DPB1*03:01	HLA-DQA1*01:02/DQB1*06:03	437	439	443	24	26	24
HLA-DRB1*01:02	HLA-DPA1*01:03/DPB1*03:01	HLA-DQA1*01:02/DQB1*06:04	437	439	443	24	26	24
HLA-DRB1*01:02	HLA-DPA1*01:03/DPB1*03:01	HLA-DQA1*01:02/DQB1*06:09	437	439	443	24	26	24
HLA-DRB1*01:02	HLA-DPA1*01:03/DPB1*03:01	HLA-DQA1*01:03/DQB1*03:03	437	439	443	24	26	24
HLA-DRB1*01:02	HLA-DPA1*01:03/DPB1*03:01	HLA-DQA1*01:03/DQB1*05:02	437	439	443	24	26	24
HLA-DRB1*01:02	HLA-DPA1*01:03/DPB1*03:01	HLA-DQA1*01:03/DQB1*05:03	437	439	443	24	26	24
HLA-DRB1*01:02	HLA-DPA1*01:03/DPB1*03:01	HLA-DQA1*01:03/DQB1*06:01	527	529	533	87	89	87
HLA-DRB1*01:02	HLA-DPA1*01:03/DPB1*03:01	HLA-DQA1*01:03/DQB1*06:02	533	535	539	75	77	75
HLA-DRB1*01:02	HLA-DPA1*01:03/DPB1*03:01	HLA-DQA1*01:03/DQB1*06:03	437	439	443	24	26	24
HLA-DRB1*01:02	HLA-DPA1*01:03/DPB1*03:01	HLA-DQA1*01:03/DQB1*06:09	440	442	446	27	29	27
HLA-DRB1*01:02	HLA-DPA1*01:03/DPB1*03:01	HLA-DQA1*02:01/DQB1*02:01	437	439	443	24	26	24
HLA-DRB1*01:02	HLA-DPA1*01:03/DPB1*03:01	HLA-DQA1*02:01/DQB1*02:02	437	439	443	24	26	24
HLA-DRB1*01:02	HLA-DPA1*01:03/DPB1*03:01	HLA-DQA1*02:01/DQB1*03:03	447	449	453	32	34	32
HLA-DRB1*01:02	HLA-DPA1*01:03/DPB1*03:01	HLA-DQA1*02:01/DQB1*04:02	439	441	445	26	28	26
HLA-DRB1*01:02	HLA-DPA1*01:03/DPB1*03:01	HLA-DQA1*02:01/DQB1*06:04	437	439	443	24	26	24
HLA-DRB1*01:02	HLA-DPA1*01:03/DPB1*03:01	HLA-DQA1*03:01/DQB1*03:02	437	439	443	24	26	24
HLA-DRB1*01:02	HLA-DPA1*01:03/DPB1*03:01	HLA-DQA1*03:01/DQB1*06:01	437	439	443	24	26	24
HLA-DRB1*01:02	HLA-DPA1*01:03/DPB1*03:01	HLA-DQA1*04:01/DQB1*02:01	437	439	443	24	26	24
HLA-DRB1*01:02	HLA-DPA1*01:03/DPB1*03:01	HLA-DQA1*04:01/DQB1*03:01	443	445	449	24	26	24
HLA-DRB1*01:02	HLA-DPA1*01:03/DPB1*03:01	HLA-DQA1*04:01/DQB1*03:02	437	439	443	24	26	24
HLA-DRB1*01:02	HLA-DPA1*01:03/DPB1*03:01	HLA-DQA1*04:01/DQB1*03:03	437	439	443	24	26	24
HLA-DRB1*01:02	HLA-DPA1*01:03/DPB1*03:01	HLA-DQA1*04:01/DQB1*04:02	437	439	443	24	26	24
HLA-DRB1*01:02	HLA-DPA1*01:03/DPB1*03:01	HLA-DQA1*05:01/DQB1*02:01	437	439	443	24	26	24
HLA-DRB1*01:02	HLA-DPA1*01:03/DPB1*03:01	HLA-DQA1*05:01/DQB1*03:01	907	909	913	174	176	174
HLA-DRB1*01:02	HLA-DPA1*01:03/DPB1*03:01	HLA-DQA1*05:01/DQB1*03:02	437	439	443	24	26	24
HLA-DRB1*01:02	HLA-DPA1*01:03/DPB1*03:01	HLA-DQA1*05:01/DQB1*06:01	437	439	443	24	26	24
HLA-DRB1*01:02	HLA-DPA1*01:03/DPB1*03:01	HLA-DQA1*05:01/DQB1*06:02	437	439	443	24	26	24
HLA-DRB1*01:02	HLA-DPA1*01:03/DPB1*03:01	HLA-DQA1*05:01/DQB1*06:03	437	439	443	24	26	24
HLA-DRB1*01:02	HLA-DPA1*01:03/DPB1*03:01	HLA-DQA1*05:01/DQB1*06:04	437	439	443	24	26	24
HLA-DRB1*01:02	HLA-DPA1*01:03/DPB1*03:01	HLA-DQA1*06:01/DQB1*02:01	437	439	443	24	26	24
HLA-DRB1*01:02	HLA-DPA1*01:03/DPB1*03:01	HLA-DQA1*06:01/DQB1*03:01	563	565	569	63	65	63
HLA-DRB1*01:02	HLA-DPA1*01:03/DPB1*03:01	HLA-DQA1*06:01/DQB1*03:03	437	439	443	24	26	24
HLA-DRB1*01:02	HLA-DPA1*01:03/DPB1*03:01	HLA-DQA1*06:01/DQB1*04:02	437	439	443	24	26	24
HLA-DRB1*01:02	HLA-DPA1*01:03/DPB1*03:01	HLA-DQA1*06:01/DQB1*06:01	437	439	443	24	26	24
HLA-DRB1*01:02	HLA-DPA1*01:03/DPB1*03:01	HLA-DQA1*06:01/DQB1*06:03	437	439	443	24	26	24
HLA-DRB1*01:02	HLA-DPA1*01:03/DPB1*04:01	HLA-DQA1*01:01/DQB1*02:01	1184	1184	1191	159	159	160
HLA-DRB1*01:02	HLA-DPA1*01:03/DPB1*04:01	HLA-DQA1*01:01/DQB1*05:01	1184	1184	1191	159	159	160
HLA-DRB1*01:02	HLA-DPA1*01:03/DPB1*04:01	HLA-DQA1*01:01/DQB1*05:02	1184	1184	1191	159	159	160
HLA-DRB1*01:02	HLA-DPA1*01:03/DPB1*04:01	HLA-DQA1*01:01/DQB1*05:03	1184	1184	1191	159	159	160
HLA-DRB1*01:02	HLA-DPA1*01:03/DPB1*04:01	HLA-DQA1*01:01/DQB1*06:01	1185	1185	1192	160	160	161
HLA-DRB1*01:02	HLA-DPA1*01:03/DPB1*04:01	HLA-DQA1*01:01/DQB1*06:02	1184	1184	1191	159	159	160
HLA-DRB1*01:02	HLA-DPA1*01:03/DPB1*04:01	HLA-DQA1*01:01/DQB1*06:04	1184	1184	1191	159	159	160
HLA-DRB1*01:02	HLA-DPA1*01:03/DPB1*04:01	HLA-DQA1*01:02/DQB1*02:01	1184	1184	1191	159	159	160
HLA-DRB1*01:02	HLA-DPA1*01:03/DPB1*04:01	HLA-DQA1*01:02/DQB1*05:01	3000	3001	3012	341	341	340
HLA-DRB1*01:02	HLA-DPA1*01:03/DPB1*04:01	HLA-DQA1*01:02/DQB1*05:02	1184	1184	1191	159	159	160
HLA-DRB1*01:02	HLA-DPA1*01:03/DPB1*04:01	HLA-DQA1*01:02/DQB1*05:03	1213	1213	1220	161	161	162
HLA-DRB1*01:02	HLA-DPA1*01:03/DPB1*04:01	HLA-DQA1*01:02/DQB1*06:01	1270	1270	1277	215	215	216
HLA-DRB1*01:02	HLA-DPA1*01:03/DPB1*04:01	HLA-DQA1*01:02/DQB1*06:02	1434	1435	1442	213	214	215
HLA-DRB1*01:02	HLA-DPA1*01:03/DPB1*04:01	HLA-DQA1*01:02/DQB1*06:03	1184	1184	1191	159	159	160
HLA-DRB1*01:02	HLA-DPA1*01:03/DPB1*04:01	HLA-DQA1*01:02/DQB1*06:04	1184	1184	1191	159	159	160
HLA-DRB1*01:02	HLA-DPA1*01:03/DPB1*04:01	HLA-DQA1*01:02/DQB1*06:09	1184	1184	1191	159	159	160
HLA-DRB1*01:02	HLA-DPA1*01:03/DPB1*04:01	HLA-DQA1*01:03/DQB1*03:03	1184	1184	1191	159	159	160
HLA-DRB1*01:02	HLA-DPA1*01:03/DPB1*04:01	HLA-DQA1*01:03/DQB1*05:02	1184	1184	1191	159	159	160
HLA-DRB1*01:02	HLA-DPA1*01:03/DPB1*04:01	HLA-DQA1*01:03/DQB1*05:03	1184	1184	1191	159	159	160
HLA-DRB1*01:02	HLA-DPA1*01:03/DPB1*04:01	HLA-DQA1*01:03/DQB1*06:01	1277	1277	1284	225	225	226
HLA-DRB1*01:02	HLA-DPA1*01:03/DPB1*04:01	HLA-DQA1*01:03/DQB1*06:02	1283	1283	1290	213	213	214
HLA-DRB1*01:02	HLA-DPA1*01:03/DPB1*04:01	HLA-DQA1*01:03/DQB1*06:03	1184	1184	1191	159	159	160
HLA-DRB1*01:02	HLA-DPA1*01:03/DPB1*04:01	HLA-DQA1*01:03/DQB1*06:09	1188	1188	1195	163	163	164
HLA-DRB1*01:02	HLA-DPA1*01:03/DPB1*04:01	HLA-DQA1*02:01/DQB1*02:01	1184	1184	1191	159	159	160
HLA-DRB1*01:02	HLA-DPA1*01:03/DPB1*04:01	HLA-DQA1*02:01/DQB1*02:02	1184	1184	1191	159	159	160
HLA-DRB1*01:02	HLA-DPA1*01:03/DPB1*04:01	HLA-DQA1*02:01/DQB1*03:03	1195	1195	1202	168	168	169
HLA-DRB1*01:02	HLA-DPA1*01:03/DPB1*04:01	HLA-DQA1*02:01/DQB1*04:02	1186	1186	1193	161	161	162
HLA-DRB1*01:02	HLA-DPA1*01:03/DPB1*04:01	HLA-DQA1*02:01/DQB1*06:04	1184	1184	1191	159	159	160
HLA-DRB1*01:02	HLA-DPA1*01:03/DPB1*04:01	HLA-DQA1*03:01/DQB1*03:02	1184	1184	1191	159	159	160
HLA-DRB1*01:02	HLA-DPA1*01:03/DPB1*04:01	HLA-DQA1*03:01/DQB1*06:01	1184	1184	1191	159	159	160
HLA-DRB1*01:02	HLA-DPA1*01:03/DPB1*04:01	HLA-DQA1*04:01/DQB1*02:01	1184	1184	1191	159	159	160
HLA-DRB1*01:02	HLA-DPA1*01:03/DPB1*04:01	HLA-DQA1*04:01/DQB1*03:01	1190	1190	1197	159	159	160
HLA-DRB1*01:02	HLA-DPA1*01:03/DPB1*04:01	HLA-DQA1*04:01/DQB1*03:02	1184	1184	1191	159	159	160
HLA-DRB1*01:02	HLA-DPA1*01:03/DPB1*04:01	HLA-DQA1*04:01/DQB1*03:03	1184	1184	1191	159	159	160
HLA-DRB1*01:02	HLA-DPA1*01:03/DPB1*04:01	HLA-DQA1*04:01/DQB1*04:02	1184	1184	1191	159	159	160
HLA-DRB1*01:02	HLA-DPA1*01:03/DPB1*04:01	HLA-DQA1*05:01/DQB1*02:01	1184	1184	1191	159	159	160
HLA-DRB1*01:02	HLA-DPA1*01:03/DPB1*04:01	HLA-DQA1*05:01/DQB1*03:01	1657	1657	1664	312	312	313
HLA-DRB1*01:02	HLA-DPA1*01:03/DPB1*04:01	HLA-DQA1*05:01/DQB1*03:02	1184	1184	1191	159	159	160
HLA-DRB1*01:02	HLA-DPA1*01:03/DPB1*04:01	HLA-DQA1*05:01/DQB1*06:01	1184	1184	1191	159	159	160
HLA-DRB1*01:02	HLA-DPA1*01:03/DPB1*04:01	HLA-DQA1*05:01/DQB1*06:02	1184	1184	1191	159	159	160
HLA-DRB1*01:02	HLA-DPA1*01:03/DPB1*04:01	HLA-DQA1*05:01/DQB1*06:03	1184	1184	1191	159	159	160
HLA-DRB1*01:02	HLA-DPA1*01:03/DPB1*04:01	HLA-DQA1*05:01/DQB1*06:04	1184	1184	1191	159	159	160
HLA-DRB1*01:02	HLA-DPA1*01:03/DPB1*04:01	HLA-DQA1*06:01/DQB1*02:01	1184	1184	1191	159	159	160
HLA-DRB1*01:02	HLA-DPA1*01:03/DPB1*04:01	HLA-DQA1*06:01/DQB1*03:01	1311	1311	1318	199	199	200
HLA-DRB1*01:02	HLA-DPA1*01:03/DPB1*04:01	HLA-DQA1*06:01/DQB1*03:03	1184	1184	1191	159	159	160
HLA-DRB1*01:02	HLA-DPA1*01:03/DPB1*04:01	HLA-DQA1*06:01/DQB1*04:02	1184	1184	1191	159	159	160
HLA-DRB1*01:02	HLA-DPA1*01:03/DPB1*04:01	HLA-DQA1*06:01/DQB1*06:01	1184	1184	1191	159	159	160
HLA-DRB1*01:02	HLA-DPA1*01:03/DPB1*04:01	HLA-DQA1*06:01/DQB1*06:03	1184	1184	1191	159	159	160
HLA-DRB1*01:02	HLA-DPA1*01:03/DPB1*04:02	HLA-DQA1*01:01/DQB1*02:01	445	445	451	57	57	57
HLA-DRB1*01:02	HLA-DPA1*01:03/DPB1*04:02	HLA-DQA1*01:01/DQB1*05:01	445	445	451	57	57	57
HLA-DRB1*01:02	HLA-DPA1*01:03/DPB1*04:02	HLA-DQA1*01:01/DQB1*05:02	445	445	451	57	57	57
HLA-DRB1*01:02	HLA-DPA1*01:03/DPB1*04:02	HLA-DQA1*01:01/DQB1*05:03	445	445	451	57	57	57
HLA-DRB1*01:02	HLA-DPA1*01:03/DPB1*04:02	HLA-DQA1*01:01/DQB1*06:01	446	446	452	58	58	58
HLA-DRB1*01:02	HLA-DPA1*01:03/DPB1*04:02	HLA-DQA1*01:01/DQB1*06:02	445	445	451	57	57	57
HLA-DRB1*01:02	HLA-DPA1*01:03/DPB1*04:02	HLA-DQA1*01:01/DQB1*06:04	445	445	451	57	57	57
HLA-DRB1*01:02	HLA-DPA1*01:03/DPB1*04:02	HLA-DQA1*01:02/DQB1*02:01	445	445	451	57	57	57
HLA-DRB1*01:02	HLA-DPA1*01:03/DPB1*04:02	HLA-DQA1*01:02/DQB1*05:01	2339	2340	2350	240	240	238
HLA-DRB1*01:02	HLA-DPA1*01:03/DPB1*04:02	HLA-DQA1*01:02/DQB1*05:02	445	445	451	57	57	57
HLA-DRB1*01:02	HLA-DPA1*01:03/DPB1*04:02	HLA-DQA1*01:02/DQB1*05:03	474	474	480	59	59	59
HLA-DRB1*01:02	HLA-DPA1*01:03/DPB1*04:02	HLA-DQA1*01:02/DQB1*06:01	531	531	537	113	113	113
HLA-DRB1*01:02	HLA-DPA1*01:03/DPB1*04:02	HLA-DQA1*01:02/DQB1*06:02	695	696	702	111	112	112
HLA-DRB1*01:02	HLA-DPA1*01:03/DPB1*04:02	HLA-DQA1*01:02/DQB1*06:03	445	445	451	57	57	57
HLA-DRB1*01:02	HLA-DPA1*01:03/DPB1*04:02	HLA-DQA1*01:02/DQB1*06:04	445	445	451	57	57	57
HLA-DRB1*01:02	HLA-DPA1*01:03/DPB1*04:02	HLA-DQA1*01:02/DQB1*06:09	445	445	451	57	57	57
HLA-DRB1*01:02	HLA-DPA1*01:03/DPB1*04:02	HLA-DQA1*01:03/DQB1*03:03	445	445	451	57	57	57
HLA-DRB1*01:02	HLA-DPA1*01:03/DPB1*04:02	HLA-DQA1*01:03/DQB1*05:02	445	445	451	57	57	57
HLA-DRB1*01:02	HLA-DPA1*01:03/DPB1*04:02	HLA-DQA1*01:03/DQB1*05:03	445	445	451	57	57	57
HLA-DRB1*01:02	HLA-DPA1*01:03/DPB1*04:02	HLA-DQA1*01:03/DQB1*06:01	538	538	544	123	123	123
HLA-DRB1*01:02	HLA-DPA1*01:03/DPB1*04:02	HLA-DQA1*01:03/DQB1*06:02	544	544	550	111	111	111
HLA-DRB1*01:02	HLA-DPA1*01:03/DPB1*04:02	HLA-DQA1*01:03/DQB1*06:03	445	445	451	57	57	57
HLA-DRB1*01:02	HLA-DPA1*01:03/DPB1*04:02	HLA-DQA1*01:03/DQB1*06:09	449	449	455	61	61	61
HLA-DRB1*01:02	HLA-DPA1*01:03/DPB1*04:02	HLA-DQA1*02:01/DQB1*02:01	445	445	451	57	57	57
HLA-DRB1*01:02	HLA-DPA1*01:03/DPB1*04:02	HLA-DQA1*02:01/DQB1*02:02	445	445	451	57	57	57
HLA-DRB1*01:02	HLA-DPA1*01:03/DPB1*04:02	HLA-DQA1*02:01/DQB1*03:03	456	456	462	66	66	66
HLA-DRB1*01:02	HLA-DPA1*01:03/DPB1*04:02	HLA-DQA1*02:01/DQB1*04:02	447	447	453	59	59	59
HLA-DRB1*01:02	HLA-DPA1*01:03/DPB1*04:02	HLA-DQA1*02:01/DQB1*06:04	445	445	451	57	57	57
HLA-DRB1*01:02	HLA-DPA1*01:03/DPB1*04:02	HLA-DQA1*03:01/DQB1*03:02	445	445	451	57	57	57
HLA-DRB1*01:02	HLA-DPA1*01:03/DPB1*04:02	HLA-DQA1*03:01/DQB1*06:01	445	445	451	57	57	57
HLA-DRB1*01:02	HLA-DPA1*01:03/DPB1*04:02	HLA-DQA1*04:01/DQB1*02:01	445	445	451	57	57	57
HLA-DRB1*01:02	HLA-DPA1*01:03/DPB1*04:02	HLA-DQA1*04:01/DQB1*03:01	451	451	457	57	57	57
HLA-DRB1*01:02	HLA-DPA1*01:03/DPB1*04:02	HLA-DQA1*04:01/DQB1*03:02	445	445	451	57	57	57
HLA-DRB1*01:02	HLA-DPA1*01:03/DPB1*04:02	HLA-DQA1*04:01/DQB1*03:03	445	445	451	57	57	57
HLA-DRB1*01:02	HLA-DPA1*01:03/DPB1*04:02	HLA-DQA1*04:01/DQB1*04:02	445	445	451	57	57	57
HLA-DRB1*01:02	HLA-DPA1*01:03/DPB1*04:02	HLA-DQA1*05:01/DQB1*02:01	445	445	451	57	57	57
HLA-DRB1*01:02	HLA-DPA1*01:03/DPB1*04:02	HLA-DQA1*05:01/DQB1*03:01	918	918	924	210	210	210
HLA-DRB1*01:02	HLA-DPA1*01:03/DPB1*04:02	HLA-DQA1*05:01/DQB1*03:02	445	445	451	57	57	57
HLA-DRB1*01:02	HLA-DPA1*01:03/DPB1*04:02	HLA-DQA1*05:01/DQB1*06:01	445	445	451	57	57	57
HLA-DRB1*01:02	HLA-DPA1*01:03/DPB1*04:02	HLA-DQA1*05:01/DQB1*06:02	445	445	451	57	57	57
HLA-DRB1*01:02	HLA-DPA1*01:03/DPB1*04:02	HLA-DQA1*05:01/DQB1*06:03	445	445	451	57	57	57
HLA-DRB1*01:02	HLA-DPA1*01:03/DPB1*04:02	HLA-DQA1*05:01/DQB1*06:04	445	445	451	57	57	57
HLA-DRB1*01:02	HLA-DPA1*01:03/DPB1*04:02	HLA-DQA1*06:01/DQB1*02:01	445	445	451	57	57	57
HLA-DRB1*01:02	HLA-DPA1*01:03/DPB1*04:02	HLA-DQA1*06:01/DQB1*03:01	572	572	578	97	97	97
HLA-DRB1*01:02	HLA-DPA1*01:03/DPB1*04:02	HLA-DQA1*06:01/DQB1*03:03	445	445	451	57	57	57
HLA-DRB1*01:02	HLA-DPA1*01:03/DPB1*04:02	HLA-DQA1*06:01/DQB1*04:02	445	445	451	57	57	57
HLA-DRB1*01:02	HLA-DPA1*01:03/DPB1*04:02	HLA-DQA1*06:01/DQB1*06:01	445	445	451	57	57	57
HLA-DRB1*01:02	HLA-DPA1*01:03/DPB1*04:02	HLA-DQA1*06:01/DQB1*06:03	445	445	451	57	57	57
HLA-DRB1*01:02	HLA-DPA1*01:03/DPB1*05:01	HLA-DQA1*01:01/DQB1*02:01	413	413	419	26	26	26
HLA-DRB1*01:02	HLA-DPA1*01:03/DPB1*05:01	HLA-DQA1*01:01/DQB1*05:01	413	413	419	26	26	26
HLA-DRB1*01:02	HLA-DPA1*01:03/DPB1*05:01	HLA-DQA1*01:01/DQB1*05:02	413	413	419	26	26	26
HLA-DRB1*01:02	HLA-DPA1*01:03/DPB1*05:01	HLA-DQA1*01:01/DQB1*05:03	413	413	419	26	26	26
HLA-DRB1*01:02	HLA-DPA1*01:03/DPB1*05:01	HLA-DQA1*01:01/DQB1*06:01	414	414	420	27	27	27
HLA-DRB1*01:02	HLA-DPA1*01:03/DPB1*05:01	HLA-DQA1*01:01/DQB1*06:02	413	413	419	26	26	26
HLA-DRB1*01:02	HLA-DPA1*01:03/DPB1*05:01	HLA-DQA1*01:01/DQB1*06:04	413	413	419	26	26	26
HLA-DRB1*01:02	HLA-DPA1*01:03/DPB1*05:01	HLA-DQA1*01:02/DQB1*02:01	413	413	419	26	26	26
HLA-DRB1*01:02	HLA-DPA1*01:03/DPB1*05:01	HLA-DQA1*01:02/DQB1*05:01	2307	2308	2318	209	209	207
HLA-DRB1*01:02	HLA-DPA1*01:03/DPB1*05:01	HLA-DQA1*01:02/DQB1*05:02	413	413	419	26	26	26
HLA-DRB1*01:02	HLA-DPA1*01:03/DPB1*05:01	HLA-DQA1*01:02/DQB1*05:03	442	442	448	28	28	28
HLA-DRB1*01:02	HLA-DPA1*01:03/DPB1*05:01	HLA-DQA1*01:02/DQB1*06:01	499	499	505	82	82	82
HLA-DRB1*01:02	HLA-DPA1*01:03/DPB1*05:01	HLA-DQA1*01:02/DQB1*06:02	663	664	670	80	81	81
HLA-DRB1*01:02	HLA-DPA1*01:03/DPB1*05:01	HLA-DQA1*01:02/DQB1*06:03	413	413	419	26	26	26
HLA-DRB1*01:02	HLA-DPA1*01:03/DPB1*05:01	HLA-DQA1*01:02/DQB1*06:04	413	413	419	26	26	26
HLA-DRB1*01:02	HLA-DPA1*01:03/DPB1*05:01	HLA-DQA1*01:02/DQB1*06:09	413	413	419	26	26	26
HLA-DRB1*01:02	HLA-DPA1*01:03/DPB1*05:01	HLA-DQA1*01:03/DQB1*03:03	413	413	419	26	26	26
HLA-DRB1*01:02	HLA-DPA1*01:03/DPB1*05:01	HLA-DQA1*01:03/DQB1*05:02	413	413	419	26	26	26
HLA-DRB1*01:02	HLA-DPA1*01:03/DPB1*05:01	HLA-DQA1*01:03/DQB1*05:03	413	413	419	26	26	26
HLA-DRB1*01:02	HLA-DPA1*01:03/DPB1*05:01	HLA-DQA1*01:03/DQB1*06:01	506	506	512	92	92	92
HLA-DRB1*01:02	HLA-DPA1*01:03/DPB1*05:01	HLA-DQA1*01:03/DQB1*06:02	512	512	518	80	80	80
HLA-DRB1*01:02	HLA-DPA1*01:03/DPB1*05:01	HLA-DQA1*01:03/DQB1*06:03	413	413	419	26	26	26
HLA-DRB1*01:02	HLA-DPA1*01:03/DPB1*05:01	HLA-DQA1*01:03/DQB1*06:09	417	417	423	30	30	30
HLA-DRB1*01:02	HLA-DPA1*01:03/DPB1*05:01	HLA-DQA1*02:01/DQB1*02:01	413	413	419	26	26	26
HLA-DRB1*01:02	HLA-DPA1*01:03/DPB1*05:01	HLA-DQA1*02:01/DQB1*02:02	413	413	419	26	26	26
HLA-DRB1*01:02	HLA-DPA1*01:03/DPB1*05:01	HLA-DQA1*02:01/DQB1*03:03	424	424	430	35	35	35
HLA-DRB1*01:02	HLA-DPA1*01:03/DPB1*05:01	HLA-DQA1*02:01/DQB1*04:02	415	415	421	28	28	28
HLA-DRB1*01:02	HLA-DPA1*01:03/DPB1*05:01	HLA-DQA1*02:01/DQB1*06:04	413	413	419	26	26	26
HLA-DRB1*01:02	HLA-DPA1*01:03/DPB1*05:01	HLA-DQA1*03:01/DQB1*03:02	413	413	419	26	26	26
HLA-DRB1*01:02	HLA-DPA1*01:03/DPB1*05:01	HLA-DQA1*03:01/DQB1*06:01	413	413	419	26	26	26
HLA-DRB1*01:02	HLA-DPA1*01:03/DPB1*05:01	HLA-DQA1*04:01/DQB1*02:01	413	413	419	26	26	26
HLA-DRB1*01:02	HLA-DPA1*01:03/DPB1*05:01	HLA-DQA1*04:01/DQB1*03:01	419	419	425	26	26	26
HLA-DRB1*01:02	HLA-DPA1*01:03/DPB1*05:01	HLA-DQA1*04:01/DQB1*03:02	413	413	419	26	26	26
HLA-DRB1*01:02	HLA-DPA1*01:03/DPB1*05:01	HLA-DQA1*04:01/DQB1*03:03	413	413	419	26	26	26
HLA-DRB1*01:02	HLA-DPA1*01:03/DPB1*05:01	HLA-DQA1*04:01/DQB1*04:02	413	413	419	26	26	26
HLA-DRB1*01:02	HLA-DPA1*01:03/DPB1*05:01	HLA-DQA1*05:01/DQB1*02:01	413	413	419	26	26	26
HLA-DRB1*01:02	HLA-DPA1*01:03/DPB1*05:01	HLA-DQA1*05:01/DQB1*03:01	886	886	892	179	179	179
HLA-DRB1*01:02	HLA-DPA1*01:03/DPB1*05:01	HLA-DQA1*05:01/DQB1*03:02	413	413	419	26	26	26
HLA-DRB1*01:02	HLA-DPA1*01:03/DPB1*05:01	HLA-DQA1*05:01/DQB1*06:01	413	413	419	26	26	26
HLA-DRB1*01:02	HLA-DPA1*01:03/DPB1*05:01	HLA-DQA1*05:01/DQB1*06:02	413	413	419	26	26	26
HLA-DRB1*01:02	HLA-DPA1*01:03/DPB1*05:01	HLA-DQA1*05:01/DQB1*06:03	413	413	419	26	26	26
HLA-DRB1*01:02	HLA-DPA1*01:03/DPB1*05:01	HLA-DQA1*05:01/DQB1*06:04	413	413	419	26	26	26
HLA-DRB1*01:02	HLA-DPA1*01:03/DPB1*05:01	HLA-DQA1*06:01/DQB1*02:01	413	413	419	26	26	26
HLA-DRB1*01:02	HLA-DPA1*01:03/DPB1*05:01	HLA-DQA1*06:01/DQB1*03:01	540	540	546	66	66	66
HLA-DRB1*01:02	HLA-DPA1*01:03/DPB1*05:01	HLA-DQA1*06:01/DQB1*03:03	413	413	419	26	26	26
HLA-DRB1*01:02	HLA-DPA1*01:03/DPB1*05:01	HLA-DQA1*06:01/DQB1*04:02	413	413	419	26	26	26
HLA-DRB1*01:02	HLA-DPA1*01:03/DPB1*05:01	HLA-DQA1*06:01/DQB1*06:01	413	413	419	26	26	26
HLA-DRB1*01:02	HLA-DPA1*01:03/DPB1*05:01	HLA-DQA1*06:01/DQB1*06:03	413	413	419	26	26	26
HLA-DRB1*01:02	HLA-DPA1*01:03/DPB1*06:01	HLA-DQA1*01:01/DQB1*02:01	439	439	445	52	52	52
HLA-DRB1*01:02	HLA-DPA1*01:03/DPB1*06:01	HLA-DQA1*01:01/DQB1*05:01	439	439	445	52	52	52
HLA-DRB1*01:02	HLA-DPA1*01:03/DPB1*06:01	HLA-DQA1*01:01/DQB1*05:02	439	439	445	52	52	52
HLA-DRB1*01:02	HLA-DPA1*01:03/DPB1*06:01	HLA-DQA1*01:01/DQB1*05:03	439	439	445	52	52	52
HLA-DRB1*01:02	HLA-DPA1*01:03/DPB1*06:01	HLA-DQA1*01:01/DQB1*06:01	440	440	446	53	53	53
HLA-DRB1*01:02	HLA-DPA1*01:03/DPB1*06:01	HLA-DQA1*01:01/DQB1*06:02	439	439	445	52	52	52
HLA-DRB1*01:02	HLA-DPA1*01:03/DPB1*06:01	HLA-DQA1*01:01/DQB1*06:04	439	439	445	52	52	52
HLA-DRB1*01:02	HLA-DPA1*01:03/DPB1*06:01	HLA-DQA1*01:02/DQB1*02:01	439	439	445	52	52	52
HLA-DRB1*01:02	HLA-DPA1*01:03/DPB1*06:01	HLA-DQA1*01:02/DQB1*05:01	2333	2334	2344	235	235	233
HLA-DRB1*01:02	HLA-DPA1*01:03/DPB1*06:01	HLA-DQA1*01:02/DQB1*05:02	439	439	445	52	52	52
HLA-DRB1*01:02	HLA-DPA1*01:03/DPB1*06:01	HLA-DQA1*01:02/DQB1*05:03	468	468	474	54	54	54
HLA-DRB1*01:02	HLA-DPA1*01:03/DPB1*06:01	HLA-DQA1*01:02/DQB1*06:01	525	525	531	108	108	108
HLA-DRB1*01:02	HLA-DPA1*01:03/DPB1*06:01	HLA-DQA1*01:02/DQB1*06:02	689	690	696	106	107	107
HLA-DRB1*01:02	HLA-DPA1*01:03/DPB1*06:01	HLA-DQA1*01:02/DQB1*06:03	439	439	445	52	52	52
HLA-DRB1*01:02	HLA-DPA1*01:03/DPB1*06:01	HLA-DQA1*01:02/DQB1*06:04	439	439	445	52	52	52
HLA-DRB1*01:02	HLA-DPA1*01:03/DPB1*06:01	HLA-DQA1*01:02/DQB1*06:09	439	439	445	52	52	52
HLA-DRB1*01:02	HLA-DPA1*01:03/DPB1*06:01	HLA-DQA1*01:03/DQB1*03:03	439	439	445	52	52	52
HLA-DRB1*01:02	HLA-DPA1*01:03/DPB1*06:01	HLA-DQA1*01:03/DQB1*05:02	439	439	445	52	52	52
HLA-DRB1*01:02	HLA-DPA1*01:03/DPB1*06:01	HLA-DQA1*01:03/DQB1*05:03	439	439	445	52	52	52
HLA-DRB1*01:02	HLA-DPA1*01:03/DPB1*06:01	HLA-DQA1*01:03/DQB1*06:01	532	532	538	118	118	118
HLA-DRB1*01:02	HLA-DPA1*01:03/DPB1*06:01	HLA-DQA1*01:03/DQB1*06:02	538	538	544	106	106	106
HLA-DRB1*01:02	HLA-DPA1*01:03/DPB1*06:01	HLA-DQA1*01:03/DQB1*06:03	439	439	445	52	52	52
HLA-DRB1*01:02	HLA-DPA1*01:03/DPB1*06:01	HLA-DQA1*01:03/DQB1*06:09	443	443	449	56	56	56
HLA-DRB1*01:02	HLA-DPA1*01:03/DPB1*06:01	HLA-DQA1*02:01/DQB1*02:01	439	439	445	52	52	52
HLA-DRB1*01:02	HLA-DPA1*01:03/DPB1*06:01	HLA-DQA1*02:01/DQB1*02:02	439	439	445	52	52	52
HLA-DRB1*01:02	HLA-DPA1*01:03/DPB1*06:01	HLA-DQA1*02:01/DQB1*03:03	450	450	456	61	61	61
HLA-DRB1*01:02	HLA-DPA1*01:03/DPB1*06:01	HLA-DQA1*02:01/DQB1*04:02	441	441	447	54	54	54
HLA-DRB1*01:02	HLA-DPA1*01:03/DPB1*06:01	HLA-DQA1*02:01/DQB1*06:04	439	439	445	52	52	52
HLA-DRB1*01:02	HLA-DPA1*01:03/DPB1*06:01	HLA-DQA1*03:01/DQB1*03:02	439	439	445	52	52	52
HLA-DRB1*01:02	HLA-DPA1*01:03/DPB1*06:01	HLA-DQA1*03:01/DQB1*06:01	439	439	445	52	52	52
HLA-DRB1*01:02	HLA-DPA1*01:03/DPB1*06:01	HLA-DQA1*04:01/DQB1*02:01	439	439	445	52	52	52
HLA-DRB1*01:02	HLA-DPA1*01:03/DPB1*06:01	HLA-DQA1*04:01/DQB1*03:01	445	445	451	52	52	52
HLA-DRB1*01:02	HLA-DPA1*01:03/DPB1*06:01	HLA-DQA1*04:01/DQB1*03:02	439	439	445	52	52	52
HLA-DRB1*01:02	HLA-DPA1*01:03/DPB1*06:01	HLA-DQA1*04:01/DQB1*03:03	439	439	445	52	52	52
HLA-DRB1*01:02	HLA-DPA1*01:03/DPB1*06:01	HLA-DQA1*04:01/DQB1*04:02	439	439	445	52	52	52
HLA-DRB1*01:02	HLA-DPA1*01:03/DPB1*06:01	HLA-DQA1*05:01/DQB1*02:01	439	439	445	52	52	52
HLA-DRB1*01:02	HLA-DPA1*01:03/DPB1*06:01	HLA-DQA1*05:01/DQB1*03:01	912	912	918	205	205	205
HLA-DRB1*01:02	HLA-DPA1*01:03/DPB1*06:01	HLA-DQA1*05:01/DQB1*03:02	439	439	445	52	52	52
HLA-DRB1*01:02	HLA-DPA1*01:03/DPB1*06:01	HLA-DQA1*05:01/DQB1*06:01	439	439	445	52	52	52
HLA-DRB1*01:02	HLA-DPA1*01:03/DPB1*06:01	HLA-DQA1*05:01/DQB1*06:02	439	439	445	52	52	52
HLA-DRB1*01:02	HLA-DPA1*01:03/DPB1*06:01	HLA-DQA1*05:01/DQB1*06:03	439	439	445	52	52	52
HLA-DRB1*01:02	HLA-DPA1*01:03/DPB1*06:01	HLA-DQA1*05:01/DQB1*06:04	439	439	445	52	52	52
HLA-DRB1*01:02	HLA-DPA1*01:03/DPB1*06:01	HLA-DQA1*06:01/DQB1*02:01	439	439	445	52	52	52
HLA-DRB1*01:02	HLA-DPA1*01:03/DPB1*06:01	HLA-DQA1*06:01/DQB1*03:01	566	566	572	92	92	92
HLA-DRB1*01:02	HLA-DPA1*01:03/DPB1*06:01	HLA-DQA1*06:01/DQB1*03:03	439	439	445	52	52	52
HLA-DRB1*01:02	HLA-DPA1*01:03/DPB1*06:01	HLA-DQA1*06:01/DQB1*04:02	439	439	445	52	52	52
HLA-DRB1*01:02	HLA-DPA1*01:03/DPB1*06:01	HLA-DQA1*06:01/DQB1*06:01	439	439	445	52	52	52
HLA-DRB1*01:02	HLA-DPA1*01:03/DPB1*06:01	HLA-DQA1*06:01/DQB1*06:03	439	439	445	52	52	52
HLA-DRB1*01:02	HLA-DPA1*01:03/DPB1*11:01	HLA-DQA1*01:01/DQB1*02:01	413	413	419	26	26	26
HLA-DRB1*01:02	HLA-DPA1*01:03/DPB1*11:01	HLA-DQA1*01:01/DQB1*05:01	413	413	419	26	26	26
HLA-DRB1*01:02	HLA-DPA1*01:03/DPB1*11:01	HLA-DQA1*01:01/DQB1*05:02	413	413	419	26	26	26
HLA-DRB1*01:02	HLA-DPA1*01:03/DPB1*11:01	HLA-DQA1*01:01/DQB1*05:03	413	413	419	26	26	26
HLA-DRB1*01:02	HLA-DPA1*01:03/DPB1*11:01	HLA-DQA1*01:01/DQB1*06:01	414	414	420	27	27	27
HLA-DRB1*01:02	HLA-DPA1*01:03/DPB1*11:01	HLA-DQA1*01:01/DQB1*06:02	413	413	419	26	26	26
HLA-DRB1*01:02	HLA-DPA1*01:03/DPB1*11:01	HLA-DQA1*01:01/DQB1*06:04	413	413	419	26	26	26
HLA-DRB1*01:02	HLA-DPA1*01:03/DPB1*11:01	HLA-DQA1*01:02/DQB1*02:01	413	413	419	26	26	26
HLA-DRB1*01:02	HLA-DPA1*01:03/DPB1*11:01	HLA-DQA1*01:02/DQB1*05:01	2307	2308	2318	209	209	207
HLA-DRB1*01:02	HLA-DPA1*01:03/DPB1*11:01	HLA-DQA1*01:02/DQB1*05:02	413	413	419	26	26	26
HLA-DRB1*01:02	HLA-DPA1*01:03/DPB1*11:01	HLA-DQA1*01:02/DQB1*05:03	442	442	448	28	28	28
HLA-DRB1*01:02	HLA-DPA1*01:03/DPB1*11:01	HLA-DQA1*01:02/DQB1*06:01	499	499	505	82	82	82
HLA-DRB1*01:02	HLA-DPA1*01:03/DPB1*11:01	HLA-DQA1*01:02/DQB1*06:02	663	664	670	80	81	81
HLA-DRB1*01:02	HLA-DPA1*01:03/DPB1*11:01	HLA-DQA1*01:02/DQB1*06:03	413	413	419	26	26	26
HLA-DRB1*01:02	HLA-DPA1*01:03/DPB1*11:01	HLA-DQA1*01:02/DQB1*06:04	413	413	419	26	26	26
HLA-DRB1*01:02	HLA-DPA1*01:03/DPB1*11:01	HLA-DQA1*01:02/DQB1*06:09	413	413	419	26	26	26
HLA-DRB1*01:02	HLA-DPA1*01:03/DPB1*11:01	HLA-DQA1*01:03/DQB1*03:03	413	413	419	26	26	26
HLA-DRB1*01:02	HLA-DPA1*01:03/DPB1*11:01	HLA-DQA1*01:03/DQB1*05:02	413	413	419	26	26	26
HLA-DRB1*01:02	HLA-DPA1*01:03/DPB1*11:01	HLA-DQA1*01:03/DQB1*05:03	413	413	419	26	26	26
HLA-DRB1*01:02	HLA-DPA1*01:03/DPB1*11:01	HLA-DQA1*01:03/DQB1*06:01	506	506	512	92	92	92
HLA-DRB1*01:02	HLA-DPA1*01:03/DPB1*11:01	HLA-DQA1*01:03/DQB1*06:02	512	512	518	80	80	80
HLA-DRB1*01:02	HLA-DPA1*01:03/DPB1*11:01	HLA-DQA1*01:03/DQB1*06:03	413	413	419	26	26	26
HLA-DRB1*01:02	HLA-DPA1*01:03/DPB1*11:01	HLA-DQA1*01:03/DQB1*06:09	417	417	423	30	30	30
HLA-DRB1*01:02	HLA-DPA1*01:03/DPB1*11:01	HLA-DQA1*02:01/DQB1*02:01	413	413	419	26	26	26
HLA-DRB1*01:02	HLA-DPA1*01:03/DPB1*11:01	HLA-DQA1*02:01/DQB1*02:02	413	413	419	26	26	26
HLA-DRB1*01:02	HLA-DPA1*01:03/DPB1*11:01	HLA-DQA1*02:01/DQB1*03:03	424	424	430	35	35	35
HLA-DRB1*01:02	HLA-DPA1*01:03/DPB1*11:01	HLA-DQA1*02:01/DQB1*04:02	415	415	421	28	28	28
HLA-DRB1*01:02	HLA-DPA1*01:03/DPB1*11:01	HLA-DQA1*02:01/DQB1*06:04	413	413	419	26	26	26
HLA-DRB1*01:02	HLA-DPA1*01:03/DPB1*11:01	HLA-DQA1*03:01/DQB1*03:02	413	413	419	26	26	26
HLA-DRB1*01:02	HLA-DPA1*01:03/DPB1*11:01	HLA-DQA1*03:01/DQB1*06:01	413	413	419	26	26	26
HLA-DRB1*01:02	HLA-DPA1*01:03/DPB1*11:01	HLA-DQA1*04:01/DQB1*02:01	413	413	419	26	26	26
HLA-DRB1*01:02	HLA-DPA1*01:03/DPB1*11:01	HLA-DQA1*04:01/DQB1*03:01	419	419	425	26	26	26
HLA-DRB1*01:02	HLA-DPA1*01:03/DPB1*11:01	HLA-DQA1*04:01/DQB1*03:02	413	413	419	26	26	26
HLA-DRB1*01:02	HLA-DPA1*01:03/DPB1*11:01	HLA-DQA1*04:01/DQB1*03:03	413	413	419	26	26	26
HLA-DRB1*01:02	HLA-DPA1*01:03/DPB1*11:01	HLA-DQA1*04:01/DQB1*04:02	413	413	419	26	26	26
HLA-DRB1*01:02	HLA-DPA1*01:03/DPB1*11:01	HLA-DQA1*05:01/DQB1*02:01	413	413	419	26	26	26
HLA-DRB1*01:02	HLA-DPA1*01:03/DPB1*11:01	HLA-DQA1*05:01/DQB1*03:01	886	886	892	179	179	179
HLA-DRB1*01:02	HLA-DPA1*01:03/DPB1*11:01	HLA-DQA1*05:01/DQB1*03:02	413	413	419	26	26	26
HLA-DRB1*01:02	HLA-DPA1*01:03/DPB1*11:01	HLA-DQA1*05:01/DQB1*06:01	413	413	419	26	26	26
HLA-DRB1*01:02	HLA-DPA1*01:03/DPB1*11:01	HLA-DQA1*05:01/DQB1*06:02	413	413	419	26	26	26
HLA-DRB1*01:02	HLA-DPA1*01:03/DPB1*11:01	HLA-DQA1*05:01/DQB1*06:03	413	413	419	26	26	26
HLA-DRB1*01:02	HLA-DPA1*01:03/DPB1*11:01	HLA-DQA1*05:01/DQB1*06:04	413	413	419	26	26	26
HLA-DRB1*01:02	HLA-DPA1*01:03/DPB1*11:01	HLA-DQA1*06:01/DQB1*02:01	413	413	419	26	26	26
HLA-DRB1*01:02	HLA-DPA1*01:03/DPB1*11:01	HLA-DQA1*06:01/DQB1*03:01	540	540	546	66	66	66
HLA-DRB1*01:02	HLA-DPA1*01:03/DPB1*11:01	HLA-DQA1*06:01/DQB1*03:03	413	413	419	26	26	26
HLA-DRB1*01:02	HLA-DPA1*01:03/DPB1*11:01	HLA-DQA1*06:01/DQB1*04:02	413	413	419	26	26	26
HLA-DRB1*01:02	HLA-DPA1*01:03/DPB1*11:01	HLA-DQA1*06:01/DQB1*06:01	413	413	419	26	26	26
HLA-DRB1*01:02	HLA-DPA1*01:03/DPB1*11:01	HLA-DQA1*06:01/DQB1*06:03	413	413	419	26	26	26
HLA-DRB1*01:02	HLA-DPA1*01:03/DPB1*17:01	HLA-DQA1*01:01/DQB1*02:01	413	413	419	26	26	26
HLA-DRB1*01:02	HLA-DPA1*01:03/DPB1*17:01	HLA-DQA1*01:01/DQB1*05:01	413	413	419	26	26	26
HLA-DRB1*01:02	HLA-DPA1*01:03/DPB1*17:01	HLA-DQA1*01:01/DQB1*05:02	413	413	419	26	26	26
HLA-DRB1*01:02	HLA-DPA1*01:03/DPB1*17:01	HLA-DQA1*01:01/DQB1*05:03	413	413	419	26	26	26
HLA-DRB1*01:02	HLA-DPA1*01:03/DPB1*17:01	HLA-DQA1*01:01/DQB1*06:01	414	414	420	27	27	27
HLA-DRB1*01:02	HLA-DPA1*01:03/DPB1*17:01	HLA-DQA1*01:01/DQB1*06:02	413	413	419	26	26	26
HLA-DRB1*01:02	HLA-DPA1*01:03/DPB1*17:01	HLA-DQA1*01:01/DQB1*06:04	413	413	419	26	26	26
HLA-DRB1*01:02	HLA-DPA1*01:03/DPB1*17:01	HLA-DQA1*01:02/DQB1*02:01	413	413	419	26	26	26
HLA-DRB1*01:02	HLA-DPA1*01:03/DPB1*17:01	HLA-DQA1*01:02/DQB1*05:01	2307	2308	2318	209	209	207
HLA-DRB1*01:02	HLA-DPA1*01:03/DPB1*17:01	HLA-DQA1*01:02/DQB1*05:02	413	413	419	26	26	26
HLA-DRB1*01:02	HLA-DPA1*01:03/DPB1*17:01	HLA-DQA1*01:02/DQB1*05:03	442	442	448	28	28	28
HLA-DRB1*01:02	HLA-DPA1*01:03/DPB1*17:01	HLA-DQA1*01:02/DQB1*06:01	499	499	505	82	82	82
HLA-DRB1*01:02	HLA-DPA1*01:03/DPB1*17:01	HLA-DQA1*01:02/DQB1*06:02	663	664	670	80	81	81
HLA-DRB1*01:02	HLA-DPA1*01:03/DPB1*17:01	HLA-DQA1*01:02/DQB1*06:03	413	413	419	26	26	26
HLA-DRB1*01:02	HLA-DPA1*01:03/DPB1*17:01	HLA-DQA1*01:02/DQB1*06:04	413	413	419	26	26	26
HLA-DRB1*01:02	HLA-DPA1*01:03/DPB1*17:01	HLA-DQA1*01:02/DQB1*06:09	413	413	419	26	26	26
HLA-DRB1*01:02	HLA-DPA1*01:03/DPB1*17:01	HLA-DQA1*01:03/DQB1*03:03	413	413	419	26	26	26
HLA-DRB1*01:02	HLA-DPA1*01:03/DPB1*17:01	HLA-DQA1*01:03/DQB1*05:02	413	413	419	26	26	26
HLA-DRB1*01:02	HLA-DPA1*01:03/DPB1*17:01	HLA-DQA1*01:03/DQB1*05:03	413	413	419	26	26	26
HLA-DRB1*01:02	HLA-DPA1*01:03/DPB1*17:01	HLA-DQA1*01:03/DQB1*06:01	506	506	512	92	92	92
HLA-DRB1*01:02	HLA-DPA1*01:03/DPB1*17:01	HLA-DQA1*01:03/DQB1*06:02	512	512	518	80	80	80
HLA-DRB1*01:02	HLA-DPA1*01:03/DPB1*17:01	HLA-DQA1*01:03/DQB1*06:03	413	413	419	26	26	26
HLA-DRB1*01:02	HLA-DPA1*01:03/DPB1*17:01	HLA-DQA1*01:03/DQB1*06:09	417	417	423	30	30	30
HLA-DRB1*01:02	HLA-DPA1*01:03/DPB1*17:01	HLA-DQA1*02:01/DQB1*02:01	413	413	419	26	26	26
HLA-DRB1*01:02	HLA-DPA1*01:03/DPB1*17:01	HLA-DQA1*02:01/DQB1*02:02	413	413	419	26	26	26
HLA-DRB1*01:02	HLA-DPA1*01:03/DPB1*17:01	HLA-DQA1*02:01/DQB1*03:03	424	424	430	35	35	35
HLA-DRB1*01:02	HLA-DPA1*01:03/DPB1*17:01	HLA-DQA1*02:01/DQB1*04:02	415	415	421	28	28	28
HLA-DRB1*01:02	HLA-DPA1*01:03/DPB1*17:01	HLA-DQA1*02:01/DQB1*06:04	413	413	419	26	26	26
HLA-DRB1*01:02	HLA-DPA1*01:03/DPB1*17:01	HLA-DQA1*03:01/DQB1*03:02	413	413	419	26	26	26
HLA-DRB1*01:02	HLA-DPA1*01:03/DPB1*17:01	HLA-DQA1*03:01/DQB1*06:01	413	413	419	26	26	26
HLA-DRB1*01:02	HLA-DPA1*01:03/DPB1*17:01	HLA-DQA1*04:01/DQB1*02:01	413	413	419	26	26	26
HLA-DRB1*01:02	HLA-DPA1*01:03/DPB1*17:01	HLA-DQA1*04:01/DQB1*03:01	419	419	425	26	26	26
HLA-DRB1*01:02	HLA-DPA1*01:03/DPB1*17:01	HLA-DQA1*04:01/DQB1*03:02	413	413	419	26	26	26
HLA-DRB1*01:02	HLA-DPA1*01:03/DPB1*17:01	HLA-DQA1*04:01/DQB1*03:03	413	413	419	26	26	26
HLA-DRB1*01:02	HLA-DPA1*01:03/DPB1*17:01	HLA-DQA1*04:01/DQB1*04:02	413	413	419	26	26	26
HLA-DRB1*01:02	HLA-DPA1*01:03/DPB1*17:01	HLA-DQA1*05:01/DQB1*02:01	413	413	419	26	26	26
HLA-DRB1*01:02	HLA-DPA1*01:03/DPB1*17:01	HLA-DQA1*05:01/DQB1*03:01	886	886	892	179	179	179
HLA-DRB1*01:02	HLA-DPA1*01:03/DPB1*17:01	HLA-DQA1*05:01/DQB1*03:02	413	413	419	26	26	26
HLA-DRB1*01:02	HLA-DPA1*01:03/DPB1*17:01	HLA-DQA1*05:01/DQB1*06:01	413	413	419	26	26	26
HLA-DRB1*01:02	HLA-DPA1*01:03/DPB1*17:01	HLA-DQA1*05:01/DQB1*06:02	413	413	419	26	26	26
HLA-DRB1*01:02	HLA-DPA1*01:03/DPB1*17:01	HLA-DQA1*05:01/DQB1*06:03	413	413	419	26	26	26
HLA-DRB1*01:02	HLA-DPA1*01:03/DPB1*17:01	HLA-DQA1*05:01/DQB1*06:04	413	413	419	26	26	26
HLA-DRB1*01:02	HLA-DPA1*01:03/DPB1*17:01	HLA-DQA1*06:01/DQB1*02:01	413	413	419	26	26	26
HLA-DRB1*01:02	HLA-DPA1*01:03/DPB1*17:01	HLA-DQA1*06:01/DQB1*03:01	540	540	546	66	66	66
HLA-DRB1*01:02	HLA-DPA1*01:03/DPB1*17:01	HLA-DQA1*06:01/DQB1*03:03	413	413	419	26	26	26
HLA-DRB1*01:02	HLA-DPA1*01:03/DPB1*17:01	HLA-DQA1*06:01/DQB1*04:02	413	413	419	26	26	26
HLA-DRB1*01:02	HLA-DPA1*01:03/DPB1*17:01	HLA-DQA1*06:01/DQB1*06:01	413	413	419	26	26	26
HLA-DRB1*01:02	HLA-DPA1*01:03/DPB1*17:01	HLA-DQA1*06:01/DQB1*06:03	413	413	419	26	26	26
HLA-DRB1*01:02	HLA-DPA1*02:01/DPB1*01:01	HLA-DQA1*01:01/DQB1*02:01	666	666	672	95	95	95
HLA-DRB1*01:02	HLA-DPA1*02:01/DPB1*01:01	HLA-DQA1*01:01/DQB1*05:01	666	666	672	95	95	95
HLA-DRB1*01:02	HLA-DPA1*02:01/DPB1*01:01	HLA-DQA1*01:01/DQB1*05:02	666	666	672	95	95	95
HLA-DRB1*01:02	HLA-DPA1*02:01/DPB1*01:01	HLA-DQA1*01:01/DQB1*05:03	666	666	672	95	95	95
HLA-DRB1*01:02	HLA-DPA1*02:01/DPB1*01:01	HLA-DQA1*01:01/DQB1*06:01	667	667	673	96	96	96
HLA-DRB1*01:02	HLA-DPA1*02:01/DPB1*01:01	HLA-DQA1*01:01/DQB1*06:02	666	666	672	95	95	95
HLA-DRB1*01:02	HLA-DPA1*02:01/DPB1*01:01	HLA-DQA1*01:01/DQB1*06:04	666	666	672	95	95	95
HLA-DRB1*01:02	HLA-DPA1*02:01/DPB1*01:01	HLA-DQA1*01:02/DQB1*02:01	666	666	672	95	95	95
HLA-DRB1*01:02	HLA-DPA1*02:01/DPB1*01:01	HLA-DQA1*01:02/DQB1*05:01	2557	2558	2568	278	278	276
HLA-DRB1*01:02	HLA-DPA1*02:01/DPB1*01:01	HLA-DQA1*01:02/DQB1*05:02	666	666	672	95	95	95
HLA-DRB1*01:02	HLA-DPA1*02:01/DPB1*01:01	HLA-DQA1*01:02/DQB1*05:03	695	695	701	97	97	97
HLA-DRB1*01:02	HLA-DPA1*02:01/DPB1*01:01	HLA-DQA1*01:02/DQB1*06:01	752	752	758	151	151	151
HLA-DRB1*01:02	HLA-DPA1*02:01/DPB1*01:01	HLA-DQA1*01:02/DQB1*06:02	916	917	923	149	150	150
HLA-DRB1*01:02	HLA-DPA1*02:01/DPB1*01:01	HLA-DQA1*01:02/DQB1*06:03	666	666	672	95	95	95
HLA-DRB1*01:02	HLA-DPA1*02:01/DPB1*01:01	HLA-DQA1*01:02/DQB1*06:04	666	666	672	95	95	95
HLA-DRB1*01:02	HLA-DPA1*02:01/DPB1*01:01	HLA-DQA1*01:02/DQB1*06:09	666	666	672	95	95	95
HLA-DRB1*01:02	HLA-DPA1*02:01/DPB1*01:01	HLA-DQA1*01:03/DQB1*03:03	666	666	672	95	95	95
HLA-DRB1*01:02	HLA-DPA1*02:01/DPB1*01:01	HLA-DQA1*01:03/DQB1*05:02	666	666	672	95	95	95
HLA-DRB1*01:02	HLA-DPA1*02:01/DPB1*01:01	HLA-DQA1*01:03/DQB1*05:03	666	666	672	95	95	95
HLA-DRB1*01:02	HLA-DPA1*02:01/DPB1*01:01	HLA-DQA1*01:03/DQB1*06:01	759	759	765	161	161	161
HLA-DRB1*01:02	HLA-DPA1*02:01/DPB1*01:01	HLA-DQA1*01:03/DQB1*06:02	765	765	771	149	149	149
HLA-DRB1*01:02	HLA-DPA1*02:01/DPB1*01:01	HLA-DQA1*01:03/DQB1*06:03	666	666	672	95	95	95
HLA-DRB1*01:02	HLA-DPA1*02:01/DPB1*01:01	HLA-DQA1*01:03/DQB1*06:09	670	670	676	99	99	99
HLA-DRB1*01:02	HLA-DPA1*02:01/DPB1*01:01	HLA-DQA1*02:01/DQB1*02:01	666	666	672	95	95	95
HLA-DRB1*01:02	HLA-DPA1*02:01/DPB1*01:01	HLA-DQA1*02:01/DQB1*02:02	666	666	672	95	95	95
HLA-DRB1*01:02	HLA-DPA1*02:01/DPB1*01:01	HLA-DQA1*02:01/DQB1*03:03	677	677	683	104	104	104
HLA-DRB1*01:02	HLA-DPA1*02:01/DPB1*01:01	HLA-DQA1*02:01/DQB1*04:02	668	668	674	97	97	97
HLA-DRB1*01:02	HLA-DPA1*02:01/DPB1*01:01	HLA-DQA1*02:01/DQB1*06:04	666	666	672	95	95	95
HLA-DRB1*01:02	HLA-DPA1*02:01/DPB1*01:01	HLA-DQA1*03:01/DQB1*03:02	666	666	672	95	95	95
HLA-DRB1*01:02	HLA-DPA1*02:01/DPB1*01:01	HLA-DQA1*03:01/DQB1*06:01	666	666	672	95	95	95
HLA-DRB1*01:02	HLA-DPA1*02:01/DPB1*01:01	HLA-DQA1*04:01/DQB1*02:01	666	666	672	95	95	95
HLA-DRB1*01:02	HLA-DPA1*02:01/DPB1*01:01	HLA-DQA1*04:01/DQB1*03:01	672	672	678	95	95	95
HLA-DRB1*01:02	HLA-DPA1*02:01/DPB1*01:01	HLA-DQA1*04:01/DQB1*03:02	666	666	672	95	95	95
HLA-DRB1*01:02	HLA-DPA1*02:01/DPB1*01:01	HLA-DQA1*04:01/DQB1*03:03	666	666	672	95	95	95
HLA-DRB1*01:02	HLA-DPA1*02:01/DPB1*01:01	HLA-DQA1*04:01/DQB1*04:02	666	666	672	95	95	95
HLA-DRB1*01:02	HLA-DPA1*02:01/DPB1*01:01	HLA-DQA1*05:01/DQB1*02:01	666	666	672	95	95	95
HLA-DRB1*01:02	HLA-DPA1*02:01/DPB1*01:01	HLA-DQA1*05:01/DQB1*03:01	1139	1139	1145	248	248	248
HLA-DRB1*01:02	HLA-DPA1*02:01/DPB1*01:01	HLA-DQA1*05:01/DQB1*03:02	666	666	672	95	95	95
HLA-DRB1*01:02	HLA-DPA1*02:01/DPB1*01:01	HLA-DQA1*05:01/DQB1*06:01	666	666	672	95	95	95
HLA-DRB1*01:02	HLA-DPA1*02:01/DPB1*01:01	HLA-DQA1*05:01/DQB1*06:02	666	666	672	95	95	95
HLA-DRB1*01:02	HLA-DPA1*02:01/DPB1*01:01	HLA-DQA1*05:01/DQB1*06:03	666	666	672	95	95	95
HLA-DRB1*01:02	HLA-DPA1*02:01/DPB1*01:01	HLA-DQA1*05:01/DQB1*06:04	666	666	672	95	95	95
HLA-DRB1*01:02	HLA-DPA1*02:01/DPB1*01:01	HLA-DQA1*06:01/DQB1*02:01	666	666	672	95	95	95
HLA-DRB1*01:02	HLA-DPA1*02:01/DPB1*01:01	HLA-DQA1*06:01/DQB1*03:01	793	793	799	135	135	135
HLA-DRB1*01:02	HLA-DPA1*02:01/DPB1*01:01	HLA-DQA1*06:01/DQB1*03:03	666	666	672	95	95	95
HLA-DRB1*01:02	HLA-DPA1*02:01/DPB1*01:01	HLA-DQA1*06:01/DQB1*04:02	666	666	672	95	95	95
HLA-DRB1*01:02	HLA-DPA1*02:01/DPB1*01:01	HLA-DQA1*06:01/DQB1*06:01	666	666	672	95	95	95
HLA-DRB1*01:02	HLA-DPA1*02:01/DPB1*01:01	HLA-DQA1*06:01/DQB1*06:03	666	666	672	95	95	95
HLA-DRB1*01:02	HLA-DPA1*02:01/DPB1*05:01	HLA-DQA1*01:01/DQB1*02:01	412	412	418	25	25	25
HLA-DRB1*01:02	HLA-DPA1*02:01/DPB1*05:01	HLA-DQA1*01:01/DQB1*05:01	412	412	418	25	25	25
HLA-DRB1*01:02	HLA-DPA1*02:01/DPB1*05:01	HLA-DQA1*01:01/DQB1*05:02	412	412	418	25	25	25
HLA-DRB1*01:02	HLA-DPA1*02:01/DPB1*05:01	HLA-DQA1*01:01/DQB1*05:03	412	412	418	25	25	25
HLA-DRB1*01:02	HLA-DPA1*02:01/DPB1*05:01	HLA-DQA1*01:01/DQB1*06:01	413	413	419	26	26	26
HLA-DRB1*01:02	HLA-DPA1*02:01/DPB1*05:01	HLA-DQA1*01:01/DQB1*06:02	412	412	418	25	25	25
HLA-DRB1*01:02	HLA-DPA1*02:01/DPB1*05:01	HLA-DQA1*01:01/DQB1*06:04	412	412	418	25	25	25
HLA-DRB1*01:02	HLA-DPA1*02:01/DPB1*05:01	HLA-DQA1*01:02/DQB1*02:01	412	412	418	25	25	25
HLA-DRB1*01:02	HLA-DPA1*02:01/DPB1*05:01	HLA-DQA1*01:02/DQB1*05:01	2306	2307	2317	208	208	206
HLA-DRB1*01:02	HLA-DPA1*02:01/DPB1*05:01	HLA-DQA1*01:02/DQB1*05:02	412	412	418	25	25	25
HLA-DRB1*01:02	HLA-DPA1*02:01/DPB1*05:01	HLA-DQA1*01:02/DQB1*05:03	441	441	447	27	27	27
HLA-DRB1*01:02	HLA-DPA1*02:01/DPB1*05:01	HLA-DQA1*01:02/DQB1*06:01	498	498	504	81	81	81
HLA-DRB1*01:02	HLA-DPA1*02:01/DPB1*05:01	HLA-DQA1*01:02/DQB1*06:02	662	663	669	79	80	80
HLA-DRB1*01:02	HLA-DPA1*02:01/DPB1*05:01	HLA-DQA1*01:02/DQB1*06:03	412	412	418	25	25	25
HLA-DRB1*01:02	HLA-DPA1*02:01/DPB1*05:01	HLA-DQA1*01:02/DQB1*06:04	412	412	418	25	25	25
HLA-DRB1*01:02	HLA-DPA1*02:01/DPB1*05:01	HLA-DQA1*01:02/DQB1*06:09	412	412	418	25	25	25
HLA-DRB1*01:02	HLA-DPA1*02:01/DPB1*05:01	HLA-DQA1*01:03/DQB1*03:03	412	412	418	25	25	25
HLA-DRB1*01:02	HLA-DPA1*02:01/DPB1*05:01	HLA-DQA1*01:03/DQB1*05:02	412	412	418	25	25	25
HLA-DRB1*01:02	HLA-DPA1*02:01/DPB1*05:01	HLA-DQA1*01:03/DQB1*05:03	412	412	418	25	25	25
HLA-DRB1*01:02	HLA-DPA1*02:01/DPB1*05:01	HLA-DQA1*01:03/DQB1*06:01	505	505	511	91	91	91
HLA-DRB1*01:02	HLA-DPA1*02:01/DPB1*05:01	HLA-DQA1*01:03/DQB1*06:02	511	511	517	79	79	79
HLA-DRB1*01:02	HLA-DPA1*02:01/DPB1*05:01	HLA-DQA1*01:03/DQB1*06:03	412	412	418	25	25	25
HLA-DRB1*01:02	HLA-DPA1*02:01/DPB1*05:01	HLA-DQA1*01:03/DQB1*06:09	416	416	422	29	29	29
HLA-DRB1*01:02	HLA-DPA1*02:01/DPB1*05:01	HLA-DQA1*02:01/DQB1*02:01	412	412	418	25	25	25
HLA-DRB1*01:02	HLA-DPA1*02:01/DPB1*05:01	HLA-DQA1*02:01/DQB1*02:02	412	412	418	25	25	25
HLA-DRB1*01:02	HLA-DPA1*02:01/DPB1*05:01	HLA-DQA1*02:01/DQB1*03:03	423	423	429	34	34	34
HLA-DRB1*01:02	HLA-DPA1*02:01/DPB1*05:01	HLA-DQA1*02:01/DQB1*04:02	414	414	420	27	27	27
HLA-DRB1*01:02	HLA-DPA1*02:01/DPB1*05:01	HLA-DQA1*02:01/DQB1*06:04	412	412	418	25	25	25
HLA-DRB1*01:02	HLA-DPA1*02:01/DPB1*05:01	HLA-DQA1*03:01/DQB1*03:02	412	412	418	25	25	25
HLA-DRB1*01:02	HLA-DPA1*02:01/DPB1*05:01	HLA-DQA1*03:01/DQB1*06:01	412	412	418	25	25	25
HLA-DRB1*01:02	HLA-DPA1*02:01/DPB1*05:01	HLA-DQA1*04:01/DQB1*02:01	412	412	418	25	25	25
[truncated: 36,401 more rows]
